# Supplementary material
Source: publisher figshare collection journal article supplement (https://gsapubs.figshare.com/articles/dataset/_/23200769)

Chen, M., et al., 2023, Boninitic melt percolation makes depleted mantle wedges rich in silica: Geology, <https://doi.org/10.1130/G51050.1>

## Supplemental Material

**Supplemental Text.**

**Figures S1–S11.**

**Tables S1–S7.**

**Spot Locations for Electron Microprobe Analyses.**

## Supplementary Material

### Boninitic melt percolation makes depleted mantle wedges rich in silica

Ming Chen <sup>1,\*</sup>, Jianping Zheng <sup>1,\*</sup>, Hong-Kun Dai <sup>1</sup>, Qing Xiong <sup>1</sup>, Min Sun <sup>2</sup>, Mikhail M. Buslov <sup>3</sup>, Xiang Zhou <sup>1</sup> and Jingao Liu <sup>4</sup>

<sup>1</sup> State Key Laboratory of Geological Processes and Mineral Resources, School of Earth Sciences, China University of Geosciences, Wuhan 430074, China

<sup>2</sup> Department of Earth Sciences, The University of Hong Kong, Hong Kong, China

<sup>3</sup> V.S. Sobolev Institute of Geology and Mineralogy, Siberian Branch, Russian Academy of Sciences, Novosibirsk 630090, Russia

<sup>4</sup> State Key Laboratory of Geological Processes and Mineral Resources, China University of Geosciences, Beijing 100083, China

\* Corresponding authors: Ming Chen ([chenming@cug.edu.cn](mailto:chenming@cug.edu.cn)), Jianping Zheng ([jpzheng@cug.edu.cn](mailto:jpzheng@cug.edu.cn))

#### **This file includes:**

Supplemental Text

Supplementary Figures S1-S11

Supplementary Reference List

## Supplemental Text

### 1. Samples and petrography

Seventeen peridotites were collected from the Chagan-Uzun ophiolite (Fig. S2 & S3A; Table S1). They underwent weak to moderate serpentinization and are exclusively porphyroblastic in texture (Fig. S3B-C). The porphyroblasts, being mainly about 2-5 mm in diameter, are comprised predominantly of orthopyroxenes (Opx) and, to a much lesser extent, olivines (Ol). These coarse-grained minerals always show kink banding, undulatory extinction and other signs of deformation. Ol and spinel (Sp) inclusions are common within Opx porphyroblasts (Fig. S3B-C) and, occasionally, needle-like Sp exsolutions can be observed along cleavages of these coarse-grained minerals. The matrix consists mainly of finer-grained Ol, Opx, clinopyroxene (Cpx), amphibole (Amp) and Sp (Fig. S3D-F). Some of these Ol form embayments along the lobate grain boundaries of Opx porphyroblasts. In contrast to the porphyroblasts, nearly none Sp exsolutions are identified in matrix Opx. When present, Cpx always show irregular morphology with variable sizes (Fig. S3D, F) and, less commonly, they are found as relicts within Amp (Fig. S3E). Amp mostly show euhedral to subhedral morphology and, in some samples (e.g., C17-18), reaction rims of this type of mineral after primary Cpx (Fig. S3E) are well preserved, suggesting hydrous metamorphism or metasomatism. Sp are generally < 150  $\mu\text{m}$  in diameter with variable crystal shapes. They occur as discrete grains along boundaries of, or inclusions (as isolated grains or crystal clusters) within, other silicate minerals (Fig. S3D-F, S4). Point counting shows that the original mineral assemblages of the Chagan-Uzun peridotites are comprised of variable Ol (63.4-78.1 vol%), Opx (10.8-26.0 vol%), Cpx (0-4.2 vol%) and Amp (< 1.0 to 7.8 vol%)

(Table S1). Sp in most of these samples are less than 1.0 vol% but can reach up to ~ 1.5 vol% in a few samples. As such, most of the Chagan-Uzun peridotites can be classified as harzburgites (Streckeisen, 1976). For a few samples with relatively high Amp contents, this classification scheme is not applied because the contents of primary Cpx are uncertain.

## **2. Analytical procedures**

Whole-rock major elements were measured on fused glass disks through wavelength dispersive X-ray fluorescence (XRF) spectrometry using a Shimadzu XRF-1800 instrument in the State Key Laboratory of Geological Processes and Mineral Resources, China University of Geosciences, Wuhan (GPRM-CUGW). The loss-on-ignition values were calculated by measuring the percentage of weight loss after heating dried rock powders in a pre-heated corundum crucible to 1000 °C for 90 minutes. During the analysis, both the two Chinese national standards of ultramafic rocks (i.e., GBW07101 and GBW07102) and two duplicates of our own samples were inserted to monitor the data quality. Overall, the results show well reproducibility and, except for those elements with extremely low concentrations (e.g., TiO<sub>2</sub>, Na<sub>2</sub>O, K<sub>2</sub>O and P<sub>2</sub>O<sub>5</sub>, which can be actually treated as minor or trace elements in the ultramafic standards), others mostly show accuracies better than 4%. The major-element data are presented in Table S2.

Whole-rock trace elements, except for the element Ti, were determined via high-resolution inductively coupled plasma mass spectrometry (HR-ICP-MS) on a Thermo® ELEMENT XR instrument in the Radiogenic Isotope Geochemistry-RIG lab of the State Key Laboratory of Geological Processes and Mineral Resources, China University of Geosciences,



Beijing (GPRM-CUGB). About 50 mg powders (200 mesh) for each sample were digested in a mixture of 1 mL HNO<sub>3</sub> and 1 mL HF within the Teflon bombs, which were placed in a stainless-steel pressure jacket and heated to 190 °C in an oven for more than 48 hours. After cooling, the Teflon bombs were opened and placed on a hotplate at 140 °C till they dried. 1 mL HNO<sub>3</sub> was then added to each bomb. After drying by the same hotplate, 1 mL HNO<sub>3</sub>, 1mL MQ water and 1mL internal standard solution containing 1 ppm In were added into the bombs. They were then resealed and placed in the oven at 190 °C for more than 24 hours. The final solutions were transferred to polyethylene bottles and diluted to 100 g by addition of 2% HNO<sub>3</sub> for further analyses by HR-ICP-MS. Three international standards (diabase W-2, basalt BHVO-2 and peridotite JP-1; the recommended values are from GERM database) were used to monitor the analytical quality, showing that the accuracies for most trace elements are better than 5%. The element Ti of our samples was analyzed on a quadrupole inductively coupled plasma mass spectrometer (ICP-MS; Agilent 770e) in Wuhan Sample Solution Analytical Technology Co., LTD using similar procedures. Four international standards, including AGV-2, BHVO-2, BCR-2 and RGM-2, were used to monitor the analytical quality and the data show good accuracies. The trace-element data are presented in Table S3.

Thin sections (ca. 120 μm in thickness) of our samples were carefully examined using a Zeiss Sigma 300 field emission scanning electron microprobe in the GPRM-CUGW, during which backscattered electron images and compositional mapping of representative mineral phases were captured or made by a high-definition backscattered electron detector and a X-MaxN energy-dispersive X-ray spectrometer connected to this instrument, respectively. The detailed operation conditions can be referred to Dai et al. (2019) and Zhou et al. (2021).

With referring to the petrographic examinations, in-situ mineral major-element compositions of twelve representative samples (the locations are marked in a file named as “Spot locations for electron microprobe analyses” in the Supplementary Material) were analyzed on thin sections through a four-spectrometer JEOL JXA-8100 electron microprobe in the Key Laboratory of Submarine Geosciences, Second Institute of Oceanography, Ministry of Natural Administration and Wuhan Sample Solution Analytical Technology Co., LTD. The accelerating voltage, current and beam diameter are 15 kV, 20 nA and 1-5  $\mu\text{m}$ , respectively, with a counting time of 20 s (10 s for peaks and 5 s for both prior- and post-peak backgrounds) for each spectrometer. Data were corrected using a modified ZAF (atomic number, absorption, fluorescence) correction procedure. The in-situ mineral major-element data are presented in Table S4.

In-situ mineral trace-element analyses of nine representative samples on thin sections by laser ablation inductively coupled plasma mass spectrometry (LA-ICP-MS; GeoLas 2005 + Agilent 7500a) were further conducted in GPMR-CUGW and Wuhan Sample Solution Analytical Technology Co., LTD following the method from Liu et al. (2008). The diameters of ablation spots vary in the interval 90-130  $\mu\text{m}$  on the basis of the mineral sizes with frequencies of 8-10 Hz and energy densities of 4.8-5.9  $\text{J}/\text{cm}^2$  during multiple rounds of experiments. In each round, the same spot size, frequency and energy density were used to analyze samples and standards. Helium was used as carrier gas and nitrogen was added into the central gas flow (He + Ar) of the Ar plasma to increase the sensitivity (Hu et al., 2008). Each analysis consists of 20-30 s background acquisition and 50 s data acquisition from the sample. NIST SRM 612 was applied in GPMR-CUGW and NIST SRM 610 in Wuhan Sample

Solution Analytical Technology Co., LTD to correct the time-dependent drift of sensitivity. Before this correction, all count rates were firstly normalized by Si. The trace-element concentrations of our samples were calibrated using multiple external standards (i.e., USGS reference glasses BCR-2G, BIR-1G and BHVO-2G) without applying internal standard (Liu et al., 2008). All oxides are normalized to 100 wt% for nominal anhydrous minerals (i.e., clinopyroxenes and orthopyroxenes). Off-line signal selection, quantitative calibration, and time-drift correction were processed by software ICPMSDataCal (Liu et al., 2008). During data reduction, the ablation yield correction factor ( $AYCF = 100 / \sum_{j=1}^N (cps_{sam}^j \times l^j)$ ,  $l^j = C_{rm}^j / cps_{rm}^j$ ) was applied to correct the matrix-dependent absolute amount of materials ablated in each run. In this formula,  $cps_{sam}^j$  and  $cps_{rm}^j$  represent net count rates of analyte element  $j$  of the sample and reference material for calibration, and  $C_{rm}^j$  represents concentrations of element  $j$  in the reference material.  $N$  denotes the number of elements that analyzed and they include  $Li^7$ ,  $B^{11}$ ,  $Na^{23}$ ,  $Mg^{25}$ ,  $Al^{27}$ ,  $Si^{29}$ ,  $K^{39}$ ,  $Ca^{42}$ ,  $Sc^{45}$ ,  $Ti^{47}$ ,  $V^{51}$ ,  $Cr^{53}$ ,  $Mn^{55}$ ,  $Fe^{57}$ ,  $Co^{59}$ ,  $Ni^{60}$ ,  $Rb^{85}$ ,  $Sr^{88}$ ,  $Y^{89}$ ,  $Zr^{90}$ ,  $Nb^{93}$ ,  $Ba^{137}$ ,  $La^{139}$ ,  $Ce^{140}$ ,  $Pr^{141}$ ,  $Nd^{146}$ ,  $Sm^{147}$ ,  $Eu^{153}$ ,  $Gd^{157}$ ,  $Tb^{159}$ ,  $Dy^{163}$ ,  $Ho^{165}$ ,  $Er^{166}$ ,  $Tm^{169}$ ,  $Yb^{173}$ ,  $Lu^{175}$ ,  $Hf^{178}$ ,  $Ta^{181}$ ,  $Pb^{208}$ ,  $Th^{232}$  and  $U^{238}$  in this study.  $l$  value can be calculated using regression statistics on the basis of the used multiple reference materials. The in-situ mineral trace-element data are presented in Tables S5.

### 3. Major-element compositions of silicate minerals

Ol within peridotites from the Chagan-Uzun ophiolite show  $Mg^\#$ , NiO and MnO in the ranges of 90.2-91.8, 0.29-0.52 wt% and 0.03-0.21 wt% (Fig. S5A-B), respectively. Opx from these peridotites all belong to clinoenstatites, and they yield quite low  $Al_2O_3$  (0.37-2.43 wt%)

and CaO (0.14-0.44 wt%), with  $Mg^{\#}$  varying from 90.6 to 92.1 (Fig. S5C-D). Cpx from the peridotite samples are exclusively diopsides. They show elevated  $Mg^{\#}$  (93.6-95.7) and CaO (23.6-25.0 wt%) but low  $Al_2O_3$  (0.68-1.79 wt%; Fig. S5E-F) and  $TiO_2$  ( $< 0.08$  wt%). All Amp grains belong to the calcic species. They are dominated by magnesiohornblendes and only a small proportion belongs to tremolites (Leake et al., 1997; Fig. S6). Two types of Amp were identified in sample C17-68. The first type yields un-zoned internal structures and these Amp belong to magnesiohornblendes (Fig. S6). The second type is characterized by core-rim structures with sharp compositional boundaries. While the cores yield nearly identical compositions to those of the first type, the rims are all tremolites as envisaged by their elevated Si in formula.

#### 4. Trace-element modeling procedures on partial melting

Melting curves of a depleted mid-ocean-ridge basalt (MORB) mantle source (Salters and Stracke, 2004) are constructed for both bulk residues and residual clinopyroxene applying incongruent dynamic melting (Zou and Reid, 2001), a common process in the mantle (Walter, 1998). The mineral mode in the Sp-facies mantle is assumed to be  $0.53 \text{ Ol} + 0.27 \text{ Opx} + 0.17 \text{ Cpx} + 0.03 \text{ Sp}$  (Kinzler, 1997) and the anhydrous and hydrous Sp-facies melt modes are further assumed to be  $0.28 \text{ Opx} + 0.67 \text{ Cpx} + 0.11 \text{ Sp} = 0.06 \text{ Ol} + 1.00 \text{ melt}$  (Kinzler, 1997) and  $0.51 \text{ Opx} + 0.62 \text{ Cpx} + 0.12 \text{ Sp} = 0.25 \text{ Ol} + 1.00 \text{ melt}$  (Gaetani and Grove, 1998), respectively. Hydrous partitioning coefficients of Cpx and Opx from McDade et al. (2003a) and anhydrous ones of these two minerals from the same research group (McDade et al., 2003b) are applied in the modeling to make comparison between anhydrous and hydrous

melting as meaningful as possible. Only anhydrous partitioning coefficients are available for Ol and these values are referenced from McDade et al. (2003b). As to Sp, the partitioning coefficient of Yb is assumed to be zero and a value of 0.176 is used for Ti (McDade et al., 2003a) in both hydrous and anhydrous conditions. Furthermore, the porosity is assumed to be 0.001, which is regarded as the threshold to allow melt migration (Faul, 2001). The modeled Yb and Ti concentrations in Cpx and bulk rocks of residual peridotites after Sp-facies hydrous and anhydrous melting are shown in Figure S9.

## **5. Procedures in modeling hydrous fluxing melting and peridotite-melt interaction**

These processes are modelled using `Adiabat_1ph`, a text-based front-end of the (pH)MELTS family of algorithms (Smith and Asimow, 2005) that are solved for thermodynamic equilibrium between solid phases and silicate liquid.

Following the common thermal structures of mantle wedges of intra-oceanic arcs (Syracuse et al., 2010), the mantle peridotites are set to keep at 1250 °C and 1.25 GPa during hydrous fluxing melting with initial major-element compositions of depleted MORB mantle (Salters and Stracke, 2004; Table S6) and an initial oxygen fugacity of QFM-1.0. The melting degrees increase through incremental addition of slab-derived hydrous fluid (Bénard et al., 2021) produced during the transition from amphibolite- to eclogite-facies metamorphism (ca. 550 °C at 1.75 GPa; Manning, 2004; Table S6). The initial mantle peridotite is set to be 100 gram in mass and 0.1 gram of the fluxing agent is added at each step to get equilibrium with the peridotite. The modeling runs in a near-fractional mode with melt extraction threshold of 0.5%, the melt fraction beyond which will be extracted. The residual system after the

177 extraction, normally consisting of peridotite and  $< 0.5\%$  instantaneous melt, will undergo  
178 another round of fluid invasion, equilibration/melting and possible melt extraction. The  
179 bulk-rock major-element compositions of the melting residues are presented in Table S7 and  
180 Figure S11.

181 Melting residua after  $\sim 20\%$  and  $25\%$  fluxing melting are then used as initial solid  
182 reactants to react with two kinds of percolating boninitic melts, a high-Si one from Cape  
183 Vogel of Papua New Guinea (Kamenetsky et al., 2002) and a low-Si one from Northern Tonga  
184 (Sobolev and Danyushevsky, 1994; Table S6). The former has an estimated liquidus  
185 temperature of  $1440^\circ\text{C}$  (Kamenetsky et al., 2002), while the latter is assumed to be at  $1400^\circ\text{C}$ .  
186 The melt-rock interactions run at an isenthalpic mode and the threshold for instantaneous melt  
187 extraction remains at  $0.5\%$ . The initial solid mass is 100 gram and melt parcel of 1 gram is  
188 added interactively to react with the solid. The net melt consumption is the mass increase of  
189 the solid or the remains between the total melt addition and the sum of the melt mass  
190 extracted at each step. The mineral abundances and bulk-rock major-element compositions of  
191 the percolated peridotites are shown in Table S7 and Figure 4.

## 192 193 **6. Compiled data sources**

194 The data of abyssal peridotites in figures 1 and 3 of this manuscript are compiled from  
195 Niu (2004) and Warren (2016) and references therein. The data of modern forearc peridotites  
196 are sourced from Ishii (1992), Ohara and Ishii (1998), Parkinson and Pearce (1998), Pearce et  
197 al. (2000), Okamura et al. (2006), Birner et al. (2017), B  nard et al. (2021) and Day and  
198 Brown (2021), and those of arc peridotite xenoliths are from McInnes et al. (2001), Ishimaru

et al. (2007), Ionov (2010), B  nard et al. (2017) and Tollan et al. (2017). The data of  
peridotites of supra-subduction zone ophiolites are collected from Uysal et al. (2007, 2012,  
2014), Choi et al. (2008), Pag   et al. (2008, 2009), Shi et al. (2008), Aldanmaz et al. (2009,  
2020), Song et al. (2009), Jean et al. (2010), Ulrich et al. (2010), Batanova et al. (2011), Dai  
et al. (2011), Liu et al. (2012, 2016a, b, 2018), Pirard et al. (2013), Huang et al. et al. (2015),  
Kaczmarek et al. (2015), Niu et al. (2015), Xiong et al. (2015, 2016, 2017), Chen et al. (2020),  
Secchiari et al. (2020), Zhang et al. (2020), Zhou et al. (2021) and Barrett et al. (2022). The  
data of spinels within boninites from the Izu-Bonin-Mariana arc are collected from Umino  
(1986), Bloomer and Hawkins (1987), van der Laan et al. (1992), Yajima and Fujimaki (2001),  
Maehara and Maeda (2004), Dobson et al. (2006), Whattam et al. (2020) and Scholpp et al.  
(2022).

## Supplementary Figures

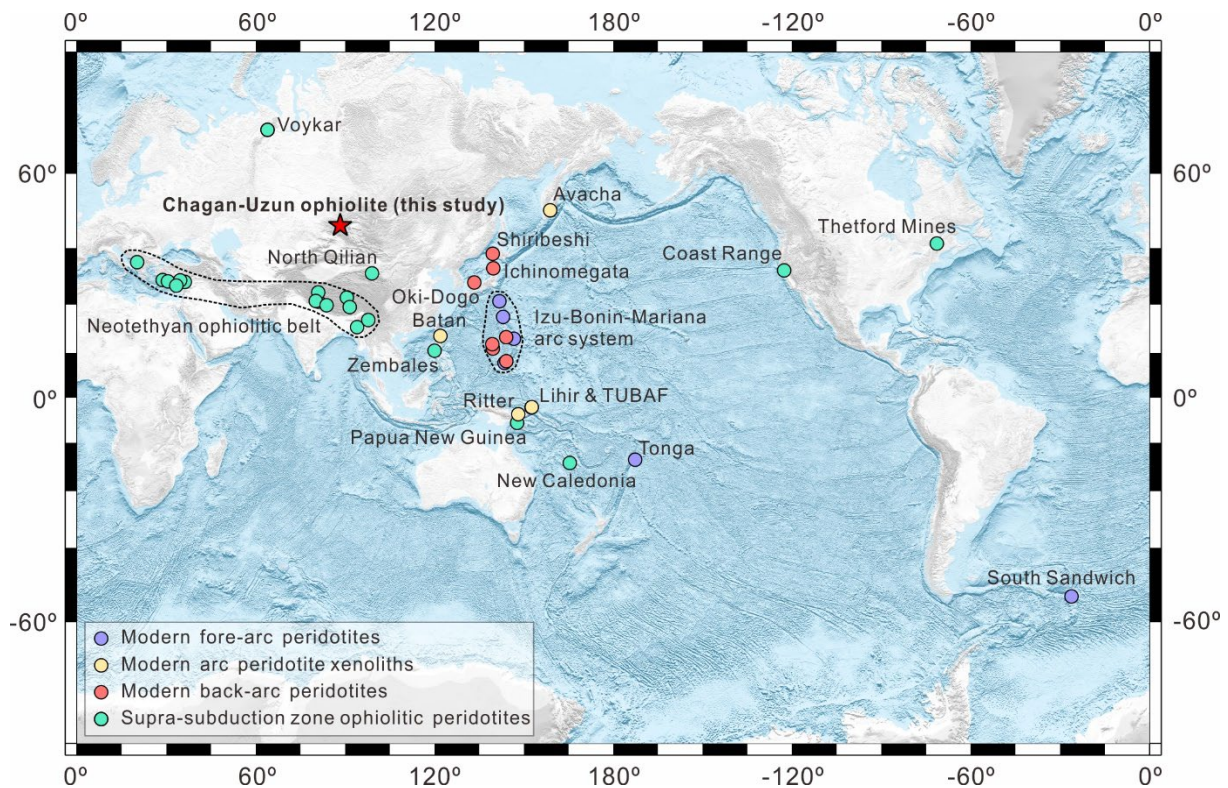

Figure S1 Global distribution of modern fore-arc, sub-arc and back-arc peridotites and typical supra-subduction zone ophiolitic peridotites. The data sources are summarized in the supplemental text. Also shown includes the late Neoproterozoic Chagan-Uzun ophiolite in this study.



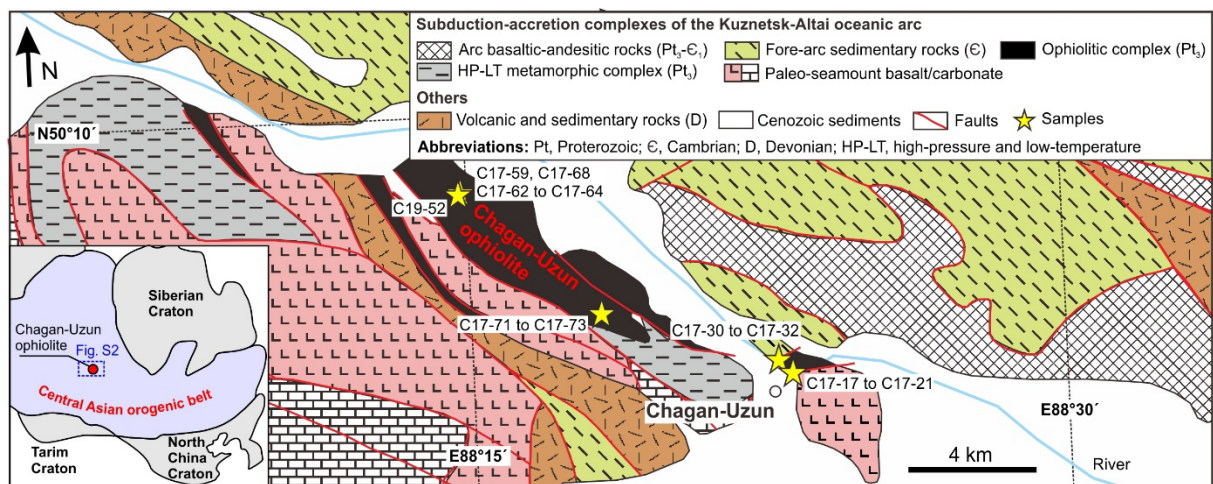

Figure S2 Geological units surrounding the Chagan-Uzun ophiolite (modified after Ota et al. (2007)). Inset shows the location of this ophiolite within the Central Asian orogenic belt.

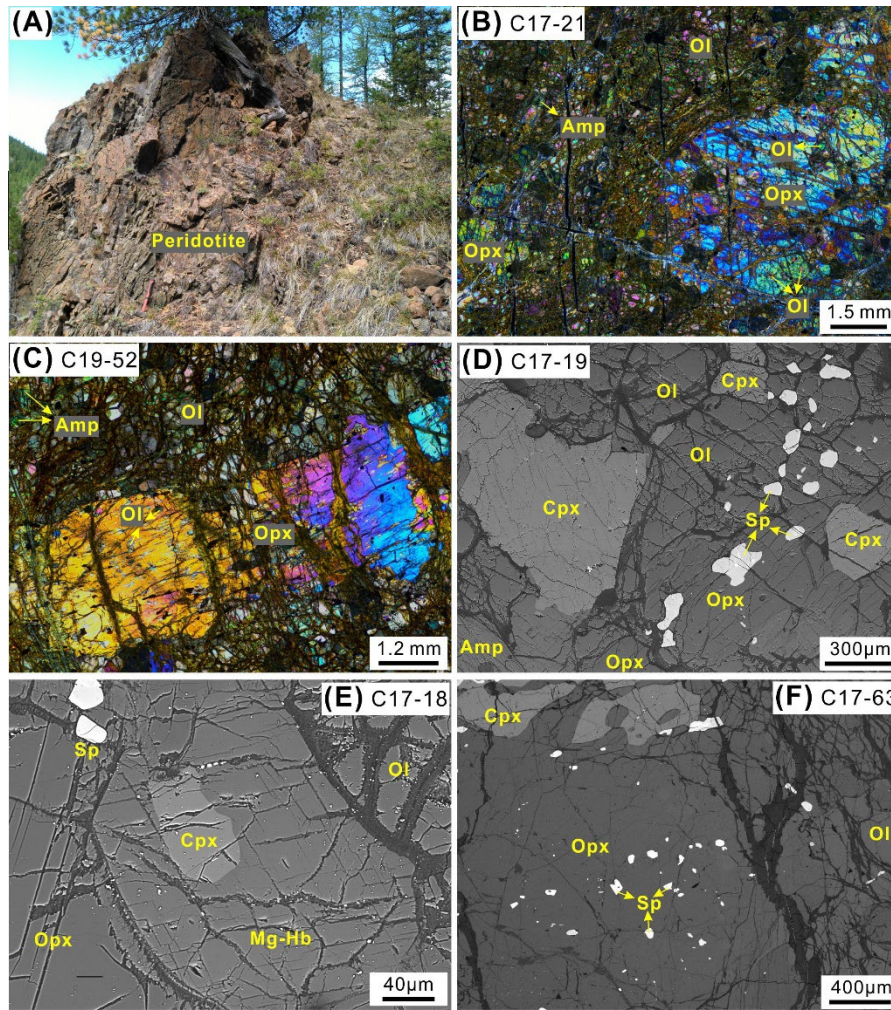

Figure S3 The field occurrence (A) and petrography (B-F) of representative peridotites from the Chagan-Uzun ophiolite. (A) The outcrop showing relatively fresh peridotites. (B-C) Samples C17-21 and C19-52 exhibiting porphyroblastic textures, in which abundant olivine (Ol) inclusions are preserved in association with tiny spinel (Sp) grains within orthopyroxene (Opx) porphyroblasts. (D) Backscattered electron image revealing the mineral assemblage mainly of Ol, Opx, clinopyroxene (Cpx), amphiboles (Amp) and Sp in sample C17-19. (E) Backscattered electron image showing that a Cpx grain is partially transformed into Amp. (F) Backscattered electron image exhibiting that the Opx porphyroblast in sample C17-63 contains abundant Sp inclusions with variable crystal morphologies. Some Ol inclusions are also identified within this porphyroblast (see compositional mapping in figure 2A).



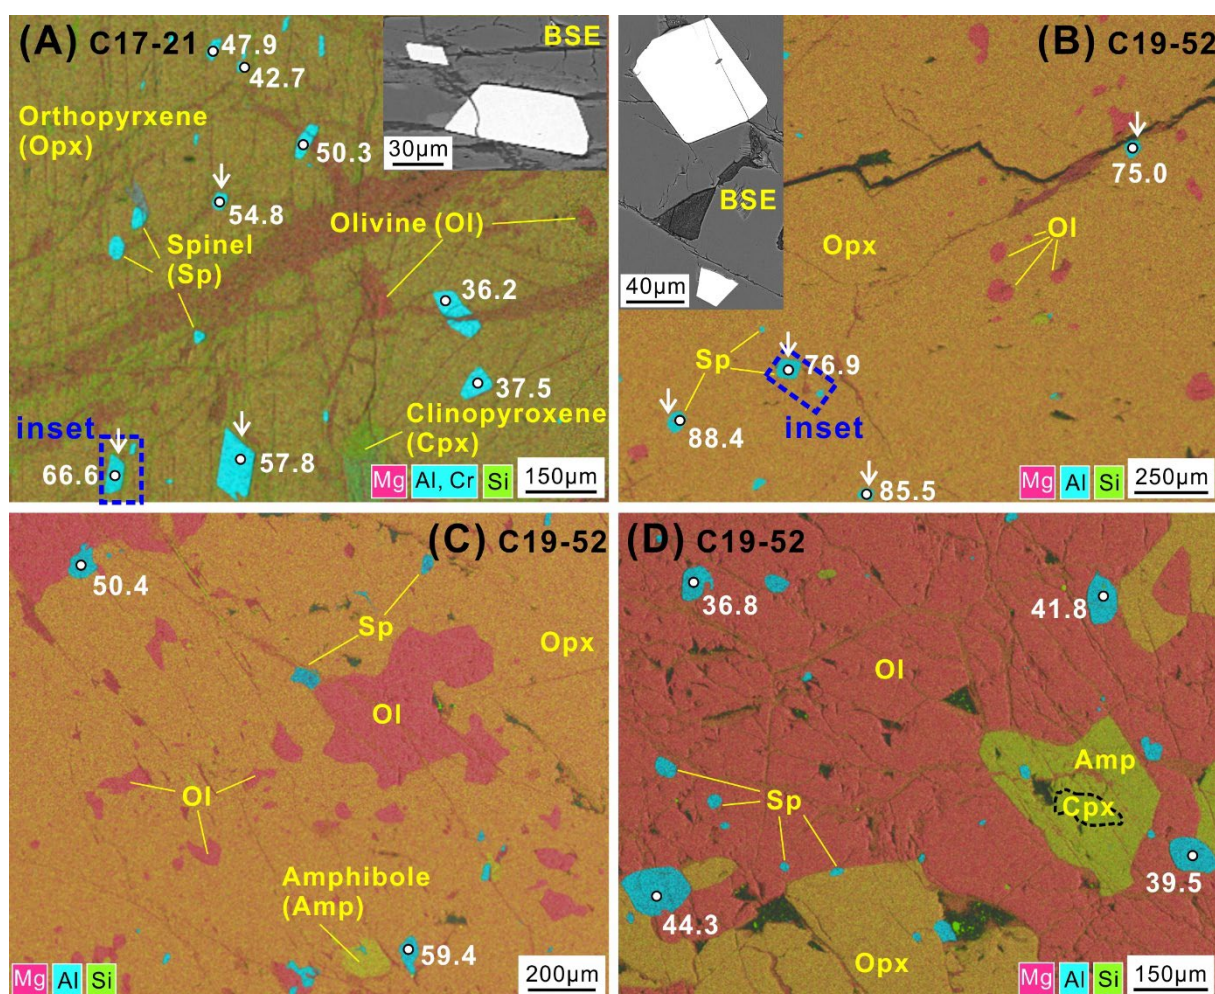

Figure S4 (A-C) Compositional maps showing resorbed olivines and variable-shaped spinels (Sp) within orthopyroxene porphyroblasts from peridotite samples C17-21 and C19-52. Insets in (A) and (B) show close-up views of representative euhedral Sp inclusions in backscattered electron (BSE) images. White arrows indicate euhedral Sp inclusions. (D) Interstitial Sp in sample C19-52. Numbers labeling Sp are Cr# ( $100 \times \text{Cr}/[\text{Cr} + \text{Al}]$ , atomic ratios).

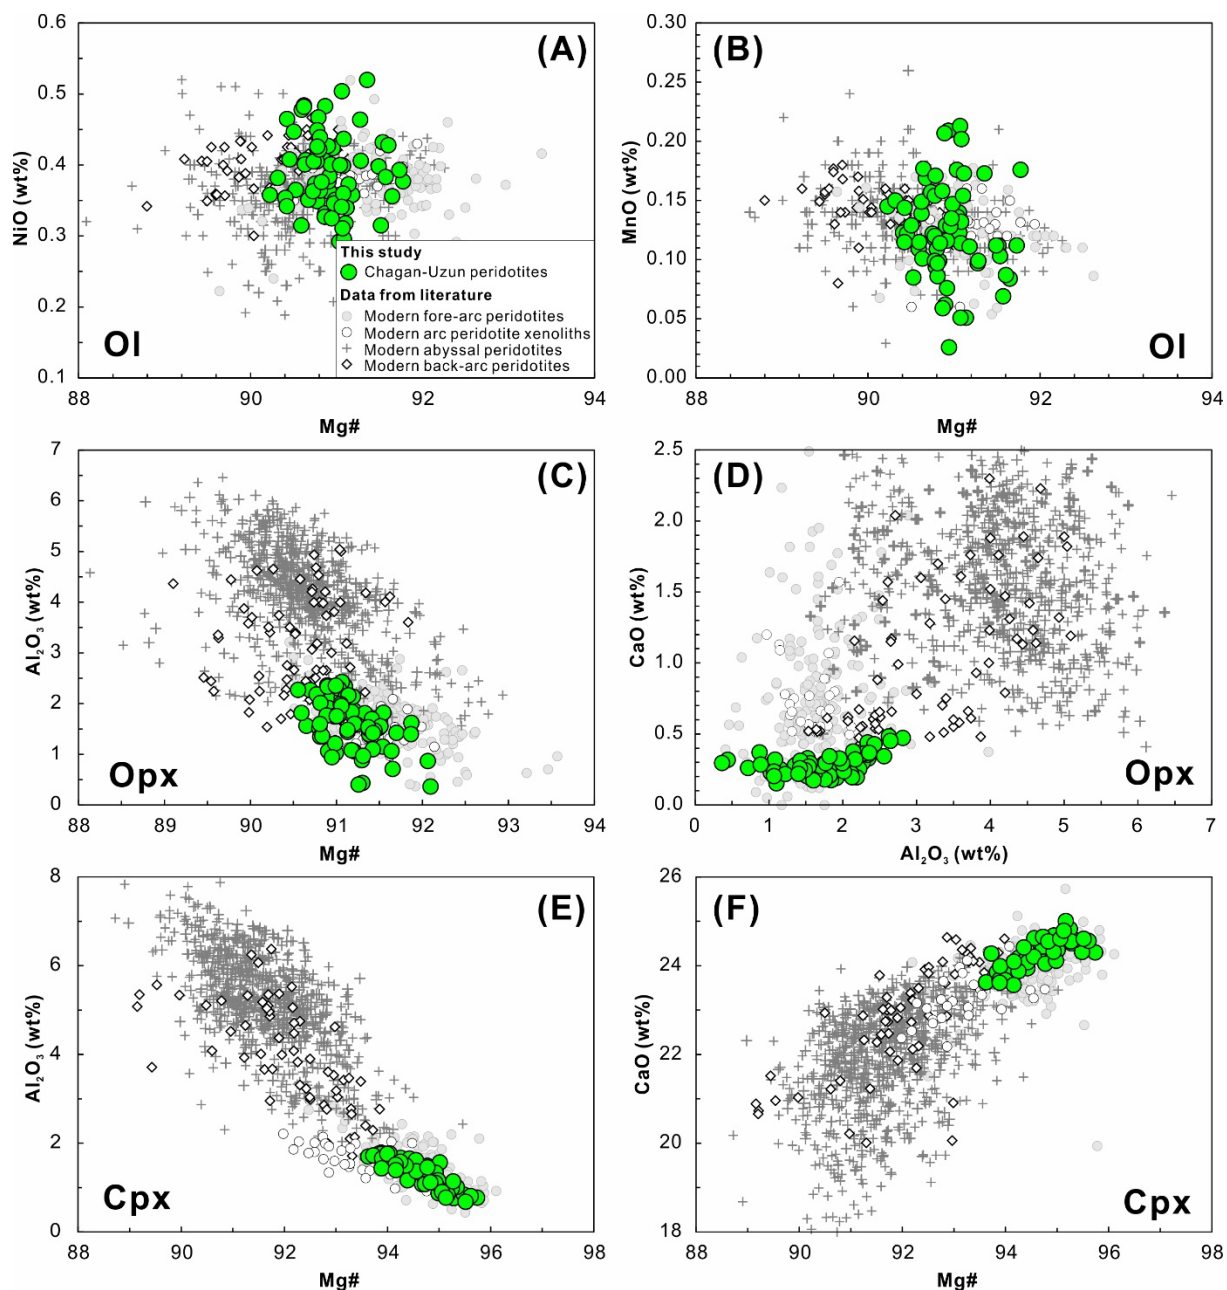

Figure S5 Major-element compositions of olivines (Ol), orthopyroxenes (Opx) and clinopyroxenes (Cpx) in peridotites from the Chagan-Uzun ophiolite.  $Mg\# = 100 \times MgO / (MgO + FeO^{total})$ , molar ratios. Reference data for those minerals in abyssal, fore-arc, arc and back-arc peridotites (see data sources in the supplemental text) are shown for comparison.

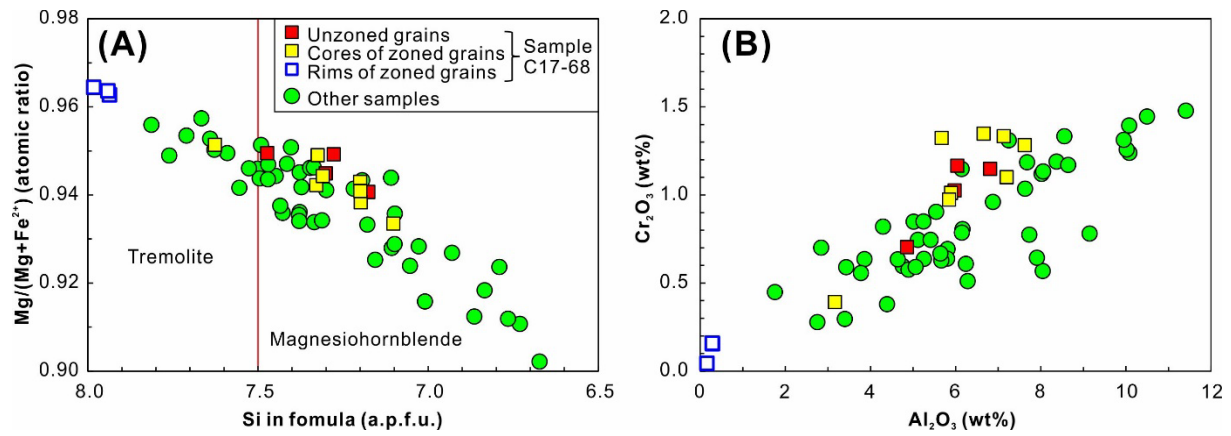

Figure S6 Compositional variations of amphiboles in peridotites from the Chagan-Uzun ophiolite. The formula was calculated using a machine learning method on the basis of principle components regression (Li et al., 2020).

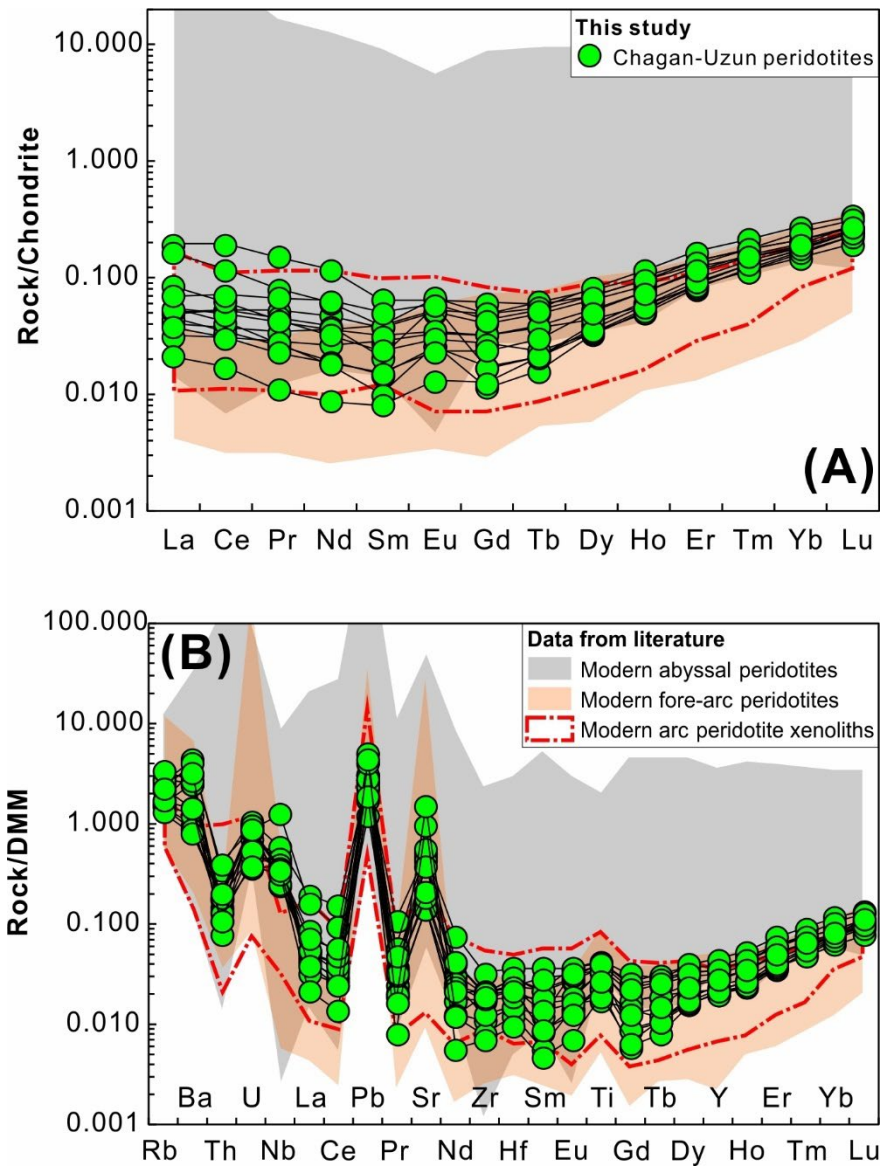

Figure S7 Whole-rock trace-element compositions of peridotites from the Chagan-Uzun ophiolite that are normalized to chondrite (Sun and McDonough, 1989) and depleted mid-ocean-ridge basalt (MORB) mantle (DMM; Salters and Stracke, 2004). Reference data for abyssal peridotites (Niu, 2004), fore-arc peridotites (Parkinson and Pearce, 1998) and arc peridotites (Ionov, 2010; Ishimaru et al., 2007) are shown for comparison.



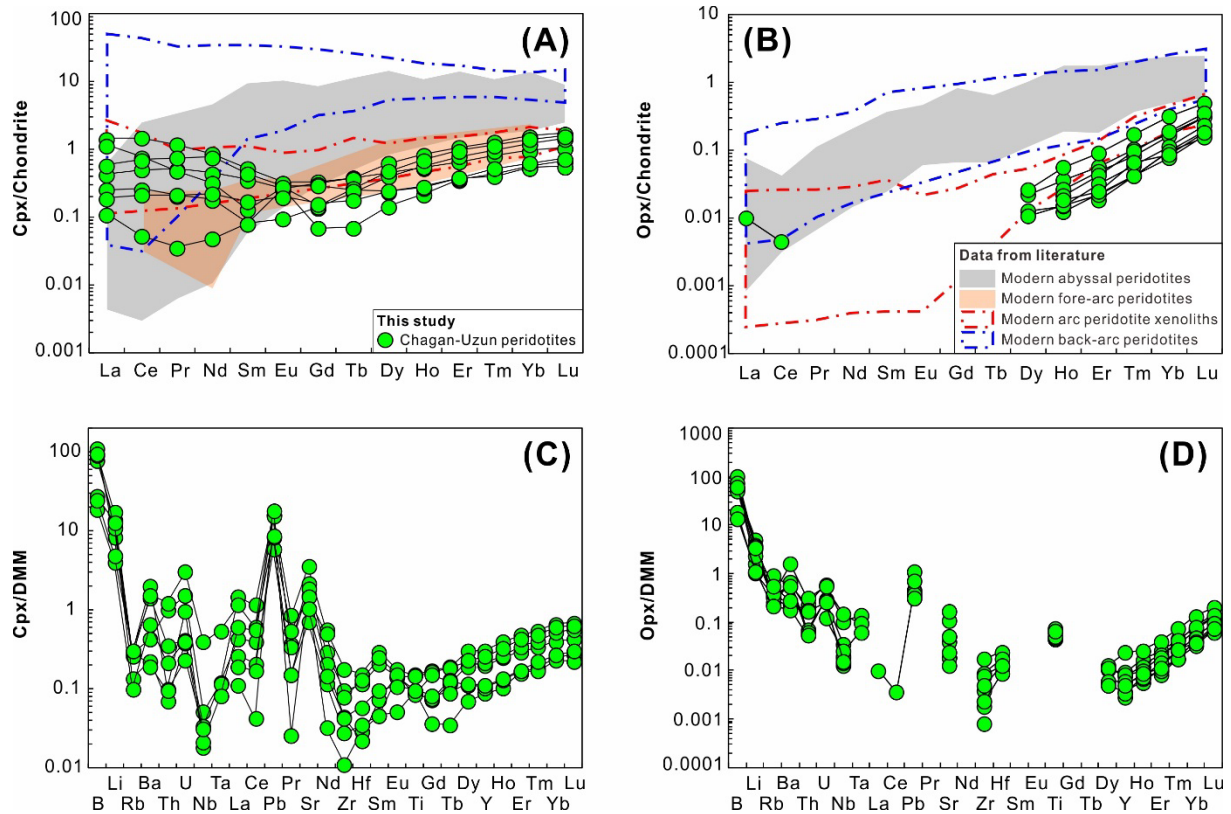

Figure S8 Chondrite-normalized rare earth element patterns and depleted mid-ocean-ridge basalt (MORB) mantle (DMM)-normalized trace-element patterns of clinopyroxenes (Cpx) and orthopyroxenes (Opx) within peridotites from the Chagan-Uzun ophiolite. Reference data for the same types of minerals from abyssal, fore-arc, arc and back-arc peridotites (see data sources in the supplemental text) are shown for comparison. The normalizing values of chondrite and DMM are from Sun and McDonough (1989) and Salters and Stracke (2004), respectively.

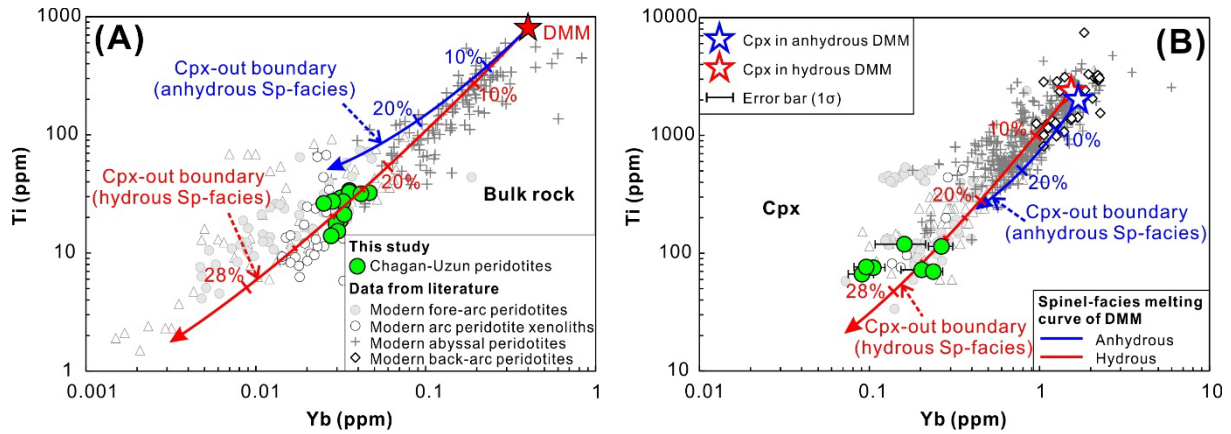

Figure S9 Bulk-rock/clinopyroxene (Cpx) Yb-Ti variations of the Chagan-Uzun peridotites in comparison with spinel (Sp)-facies melting curves of depleted mid-ocean-ridge basalt (MORB) mantle (DMM; Salters and Stracke, 2004). The data sources of fore-arc, arc, back-arc, abyssal and supra-subduction zone ophiolitic peridotites and detailed modeling procedures can be referred to the supplemental text.



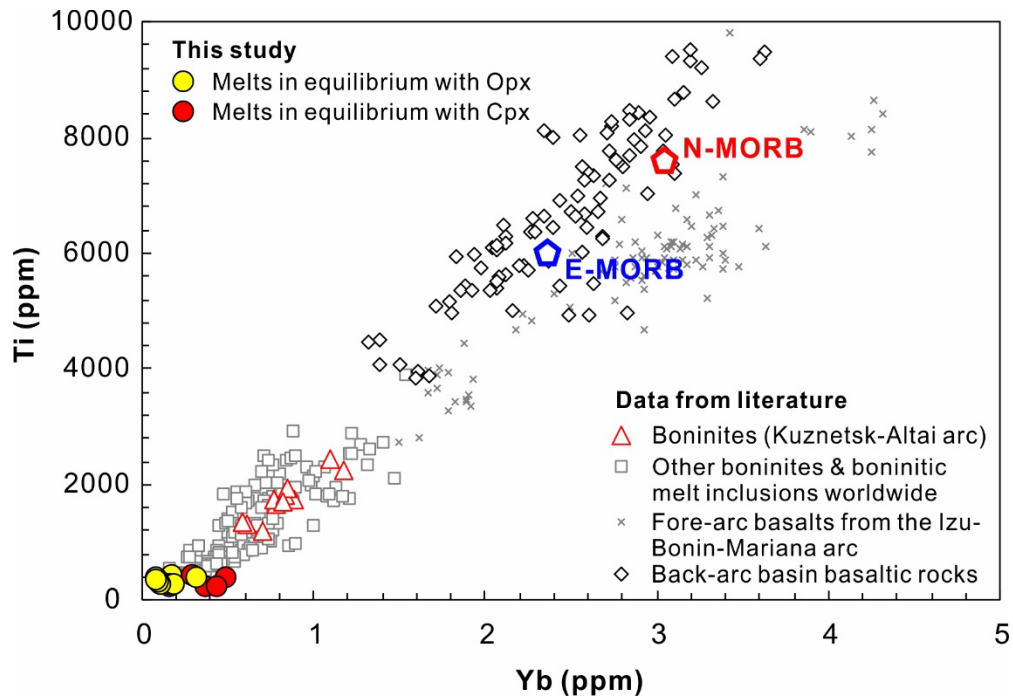

Figure S10 Estimated melts in equilibrium with Chagan-Uzun peridotitic clinopyroxenes (Cpx) and orthopyroxenes (Opx) using partition coefficients from McDade et al. (2003a, b). Boninites from the Kuznetsk-Altai oceanic arc (Chen et al., 2018), other boninites and boninitic melt inclusions worldwide (Bénard et al., 2016; Kamenetsky et al., 2002; König et al., 2008, 2010; Li et al., 2013, 2019; Osozawa et al., 2012; Reagan et al., 2010; Shervais et al., 2021; Taylor et al., 1994; Woodland et al., 2002), fore-arc basalts from the Izu-Bonin-Mariana arc (Li et al., 2019; Reagan et al., 2010; Shervais et al., 2019), and back-arc basin basaltic rocks (Fretzdorff et al., 2006; Gribble et al., 1996, 1998; Pearce et al., 2005) are shown for comparison. The data of average normal and enriched mid-ocean-ridge basalt (N-MORB and E-MORB) are from Sun and McDonough (1989).

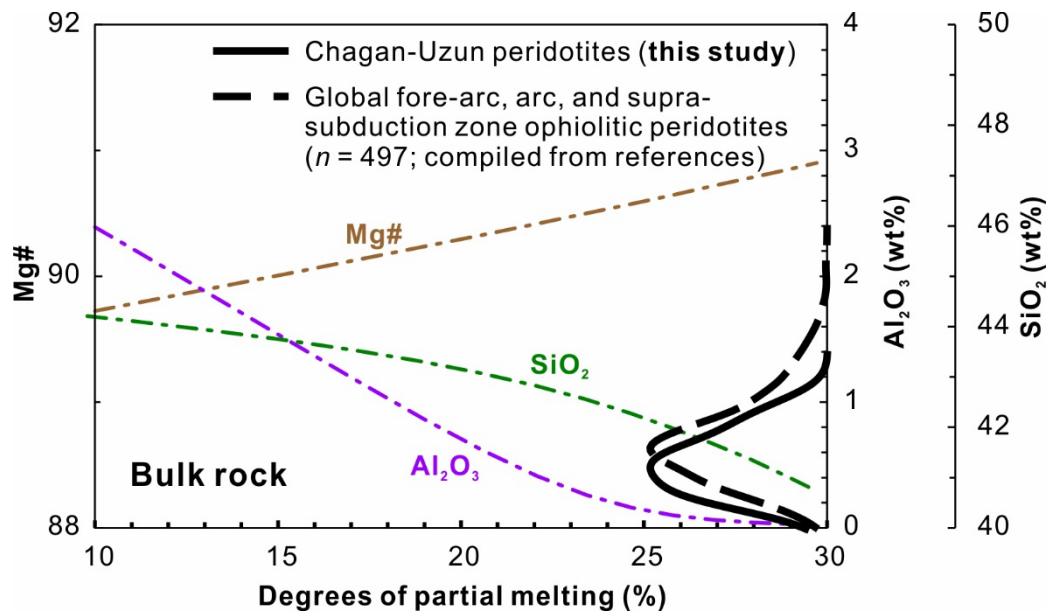

Figure S11 Bulk-rock major elements of residues after isothermal fluxing melting of depleted MORB mantle (Salters and Stracke, 2004) at 1.25 GPa and 1250 °C.  $Mg\# = 100 \times \frac{MgO}{MgO + FeO^{total}}$ , molar ratios. Kernel density plots of  $Al_2O_3$  for the Chagan-Uzun peridotites and global fore-arc, arc and supra-subduction zone (SSZ) ophiolitic counterparts are shown for comparison. The detailed modeling procedures and conditions can be referred to the supplemental text.

347

348

### Supplementary Reference List

349 Aldanmaz, E., Schmidt, M. W., Gourgaud, A., and Meisel, T., 2009, Mid-ocean ridge and

350 supra-subduction geochemical signatures in spinel–peridotites from the Neotethyan

351 ophiolites in SW Turkey: Implications for upper mantle melting processes: *Lithos*, v. 113,

352 no. 3, p. 691-708.

353 Aldanmaz, E., van Hinsbergen, D. J. J., Yıldız-Yüksekol, Ö., Schmidt, M. W., McPhee, P. J.,

354 Meisel, T., Güçtekin, A., and Mason, P. R. D., 2020, Effects of reactive dissolution of

355 orthopyroxene in producing incompatible element depleted melts and refractory mantle

356 residues during early fore-arc spreading: constraints from ophiolites in eastern

357 Mediterranean: *Lithos*, v. 360-361, p. 105438.

358 Barrett, N., Jaques, A. L., González-Álvarez, I., Walter, M. J., and Pearson, D. G., 2022,

359 Ultra-Refractory Peridotites of Phanerozoic Mantle Origin: the Papua New Guinea

360 Ophiolite Mantle Tectonites: *Journal of Petrology*, v. 63, no. 3, p. egac014.

361 Batanova, V. G., Belousov, I. A., Savelieva, G. N., and Sobolev, A. V., 2011, Consequences of

362 Channelized and Diffuse Melt Transport in Supra-subduction Zone Mantle: Evidence

363 from the Voykar Ophiolite (Polar Urals): *Journal of Petrology*, v. 52, no. 12, p.

364 2483-2521.

365 Bénard, A., Arculus, R. J., Nebel, O., Ionov, D. A., and McAlpine, S. R. B., 2017,

366 Silica-enriched mantle sources of subalkaline picrite-boninite-andesite island arc

367 magmas: *Geochimica et Cosmochimica Acta*, v. 199, p. 287-303.

368 Bénard, A., Müntener, O., Pilet, S., Arculus, R. J., and Nebel, O., 2021, Silica-rich spinel

369 harzburgite residues formed by fractional hybridization-melting of the intra-oceanic  
370 supra-subduction zone mantle: New evidence from TUBAF seamount peridotites:  
371 *Geochimica et Cosmochimica Acta*, v. 293, p. 477-506.

372 Bénard, A., Nebel, O., Ionov, D. A., Arculus, R. J., Shimizu, N., and Métrich, N., 2016,  
373 Primary Silica-rich Picrite and High-Ca Boninite Melt Inclusions in Pyroxenite Veins  
374 from the Kamchatka Sub-arc Mantle: *Journal of Petrology*, v. 57, no. 10, p. 1955-1982.

375 Birner, S. K., Warren, J. M., Cottrell, E., Davis, F. A., Kelley, K. A., and Falloon, T. J., 2017,  
376 Forearc Peridotites from Tonga Record Heterogeneous Oxidation of the Mantle  
377 following Subduction Initiation: *Journal of Petrology*, v. 58, no. 9, p. 1755-1780.

378 Bloomer, S. H., and Hawkins, J. W., 1987, Petrology and geochemistry of boninite series  
379 volcanic rocks from the Mariana trench: *Contributions to Mineralogy and Petrology*, v.  
380 97, no. 3, p. 361-377.

381 Chen, C., Su, B.-X., Xiao, Y., Uysal, İ., Lin, W., Chu, Y., Jing, J.-J., and Sakyi, P. A., 2020,  
382 Highly siderophile elements and Os isotope constraints on the genesis of peridotites from  
383 the Kızıldağ ophiolite, southern Turkey: *Lithos*, v. 368-369, p. 105583.

384 Choi, S. H., Shervais, J. W., and Mukasa, S. B., 2008, Supra-subduction and abyssal mantle  
385 peridotites of the Coast Range ophiolite, California: *Contributions to Mineralogy and*  
386 *Petrology*, v. 156, no. 5, p. 551.

387 Dai, H.-K., Zheng, J.-P., Xiong, Q., Su, Y.-P., Pan, S.-K., Ping, X.-Q., and Zhou, X., 2019,  
388 Fertile lithospheric mantle underlying ancient continental crust beneath the northwestern  
389 North China craton: Significant effect from the southward subduction of the Paleo–Asian  
390 Ocean: *GSA Bulletin*, v. 131, no. 1-2, p. 3-20.

391 Dai, J.-G., Wang, C.-S., Hébert, R., Santosh, M., Li, Y.-L., and Xu, J.-Y., 2011, Petrology and  
392 geochemistry of peridotites in the Zhongba ophiolite, Yarlung Zangbo Suture Zone:  
393 Implications for the Early Cretaceous intra-oceanic subduction zone within the  
394 Neo-Tethys: *Chemical Geology*, v. 288, no. 3, p. 133-148.

395 Day, J. M. D., and Brown, D. B., 2021, Ancient Melt-Depletion in Fresh to Strongly  
396 Serpentinized Tonga Trench Peridotites: *Journal of Petrology*, v. 62, no. 12, p. egab088.

397 Dobson, P. F., Blank, J. G., Maruyama, S., and Liou, J. G., 2006, Petrology and Geochemistry  
398 of Boninite-Series Volcanic Rocks, Chichi-Jima, Bonin Islands, Japan: *International*  
399 *Geology Review*, v. 48, no. 8, p. 669-701.

400 Faul, U. H., 2001, Melt retention and segregation beneath mid-ocean ridges: *Nature*, v. 410,  
401 no. 6831, p. 920-923.

402 Fretzdorff, S., Schwarz-Schampera, U., Gibson, H. L., Garbe-Schönberg, C. D., Hauff, F., and  
403 Stoffers, P., 2006, Hydrothermal activity and magma genesis along a propagating  
404 back-arc basin: Valu Fa Ridge (southern Lau Basin): *Journal of Geophysical Research:*  
405 *Solid Earth*, v. 111, no. B8.

406 Gaetani, G. A., and Grove, T. L., 1998, The influence of water on melting of mantle peridotite:  
407 *Contributions to Mineralogy and Petrology*, v. 131, no. 4, p. 323-346.

408 Gribble, R. F., Stern, R. J., Bloomer, S. H., Stüben, D., O'Hearn, T., and Newman, S., 1996,  
409 MORB mantle and subduction components interact to generate basalts in the southern  
410 Mariana Trough back-arc basin: *Geochimica et Cosmochimica Acta*, v. 60, no. 12, p.  
411 2153-2166.

412 Gribble, R. F., Stern, R. J., Newman, S., Bloomer, S. H., and O'Hearn, T., 1998, Chemical and

413 Isotopic Composition of Lavas from the Northern Mariana Trough: Implications for  
414 Magmagenesis in Back-arc Basins: *Journal of Petrology*, v. 39, no. 1, p. 125-154.

415 Hu, Z., Gao, S., Liu, Y., Hu, S., Chen, H., and Yuan, H., 2008, Signal enhancement in laser  
416 ablation ICP-MS by addition of nitrogen in the central channel gas: *Journal of Analytical*  
417 *Atomic Spectrometry*, v. 23, no. 8, p. 1093-1101.

418 Huang, Q.-S., Shi, R.-D., O'Reilly, S. Y., Griffin, W. L., Zhang, M., Liu, D.-L., and Zhang,  
419 X.-R., 2015, Re-Os isotopic constraints on the evolution of the Bangong-Nujiang  
420 Tethyan oceanic mantle, Central Tibet: *Lithos*, v. 224-225, p. 32-45.

421 Ionov, D. A., 2010, Petrology of Mantle Wedge Lithosphere: New Data on Supra-Subduction  
422 Zone Peridotite Xenoliths from the Andesitic Avacha Volcano, Kamchatka: *Journal of*  
423 *Petrology*, v. 51, no. 1-2, p. 327-361.

424 Ishii, T., Petrological studies of peridotites from diapiric serpentinite seamounts in the  
425 Izu-Ogasawara-Mariana forearc, Leg 125, in *Proceedings of the ocean*  
426 *drilling program, scientific results 1992*, Volume 125, Ocean Drilling Program, p.  
427 401-414.

428 Ishimaru, S., Arai, S., Ishida, Y., Shirasaka, M., and Okrugin, V. M., 2007, Melting and  
429 Multi-stage Metasomatism in the Mantle Wedge beneath a Frontal Arc Inferred from  
430 Highly Depleted Peridotite Xenoliths from the Avacha Volcano, Southern Kamchatka:  
431 *Journal of Petrology*, v. 48, no. 2, p. 395-433.

432 Jean, M. M., Shervais, J. W., Choi, S.-H., and Mukasa, S. B., 2010, Melt extraction and melt  
433 refertilization in mantle peridotite of the Coast Range ophiolite: an LA-ICP-MS study:  
434 *Contributions to Mineralogy and Petrology*, v. 159, no. 1, p. 113-116.

435 Kaczmarek, M.-A., Jonda, L., and Davies, H. L., 2015, Evidence of melting, melt percolation  
436 and deformation in a supra-subduction zone (Marum ophiolite complex, Papua New  
437 Guinea): *Contributions to Mineralogy and Petrology*, v. 170, no. 2, p. 19.

438 Kamenetsky, V. S., Sobolev, A. V., Eggins, S. M., Crawford, A. J., and Arculus, R. J., 2002,  
439 Olivine-enriched melt inclusions in chromites from low-Ca boninites, Cape Vogel, Papua  
440 New Guinea: evidence for ultramafic primary magma, refractory mantle source and  
441 enriched components: *Chemical Geology*, v. 183, no. 1, p. 287-303.

442 Kinzler, R. J., 1997, Melting of mantle peridotite at pressures approaching the spinel to garnet  
443 transition: Application to mid-ocean ridge basalt petrogenesis: *Journal of Geophysical*  
444 *Research: Solid Earth*, v. 102, no. B1, p. 853-874.

445 König, S., Münker, C., Schuth, S., and Garbe-Schönberg, D., 2008, Mobility of tungsten in  
446 subduction zones: *Earth and Planetary Science Letters*, v. 274, no. 1, p. 82-92.

447 König, S., Münker, C., Schuth, S., Luguet, A., Hoffmann, J. E., and Kuduon, J., 2010,  
448 Boninites as windows into trace element mobility in subduction zones: *Geochimica et*  
449 *Cosmochimica Acta*, v. 74, no. 2, p. 684-704.

450 Leake, B. E., Woolley, A. R., Arps, C. E. S., Birch, W. D., Gilbert, M. C., Grice, J. D.,  
451 Hawthorne, F. C., Kato, A., Kisch, H. J., Krivovichev, V. G., Linthout, K., Laird, J.,  
452 Mandarino, J. A., Maresch, W. V., Nickel, E. H., Rock, N. M. S., Schumacher, J. C.,  
453 Smith, D. C., Stephenson, N. C. N., Ungaretti, L., Whittaker, E. J. W., and Youzhi, G.,  
454 1997, Nomenclature of amphiboles: report of the subcommittee on amphiboles of the  
455 International Mineralogical Association, Commission on New Minerals and Mineral  
456 Names: *The Canadian Mineralogist*, v. 35, no. 1, p. 219-246.

457 Li, H.-Y., Taylor, R. N., Prytulak, J., Kirchenbaur, M., Shervais, J. W., Ryan, J. G., Godard,  
458 M., Reagan, M. K., and Pearce, J. A., 2019, Radiogenic isotopes document the start of  
459 subduction in the Western Pacific: *Earth and Planetary Science Letters*, v. 518, p.  
460 197-210.

461 Li, X., Zhang, C., Behrens, H., and Holtz, F., 2020, Calculating amphibole formula from  
462 electron microprobe analysis data using a machine learning method based on principal  
463 components regression: *Lithos*, v. 362-363, p. 105469.

464 Li, Y.-B., Kimura, J.-I., Machida, S., Ishii, T., Ishiwatari, A., Maruyama, S., Qiu, H.-N.,  
465 Ishikawa, T., Kato, Y., Haraguchi, S., Takahata, N., Hirahara, Y., and Miyazaki, T., 2013,  
466 High-Mg Adakite and Low-Ca Boninite from a Bonin Fore-arc Seamount: Implications  
467 for the Reaction between Slab Melts and Depleted Mantle: *Journal of Petrology*, v. 54, no.  
468 6, p. 1149-1175.

469 Liu, C.-Z., Wu, F.-Y., Chu, Z.-Y., Ji, W.-Q., Yu, L.-J., and Li, J.-L., 2012, Preservation of  
470 ancient Os isotope signatures in the Yungbwa ophiolite (southwestern Tibet) after  
471 subduction modification: *Journal of Asian Earth Sciences*, v. 53, p. 38-50.

472 Liu, C.-Z., Xu, Y., and Wu, F.-Y., 2018, Limited recycling of crustal osmium in forearc mantle  
473 during slab dehydration: *Geology*, v. 46, no. 3, p. 239-242.

474 Liu, C.-Z., Zhang, C., Xu, Y., Wang, J.-G., Chen, Y., Guo, S., Wu, F.-Y., and Sein, K., 2016a,  
475 Petrology and geochemistry of mantle peridotites from the Kalaymyo and Myitkyina  
476 ophiolites (Myanmar): Implications for tectonic settings: *Lithos*, v. 264, p. 495-508.

477 Liu, T., Zhai, Q.-g., Wang, J., Bao, P.-s., Qiangba, Z., Tang, S.-h., and Tang, Y., 2016b,  
478 Tectonic significance of the Dongqiao ophiolite in the north-central Tibetan plateau:



479 Evidence from zircon dating, petrological, geochemical and Sr–Nd–Hf isotopic  
480 characterization: *Journal of Asian Earth Sciences*, v. 116, p. 139-154.

481 Liu, Y., Hu, Z., Gao, S., Günther, D., Xu, J., Gao, C., and Chen, H., 2008, In situ analysis of  
482 major and trace elements of anhydrous minerals by LA-ICP-MS without applying an  
483 internal standard: *Chemical Geology*, v. 257, no. 1, p. 34-43.

484 Maehara, K., and Maeda, J., 2004, Evidence for high-Ca boninite magmatism from Paleogene  
485 primitive low-K tholeiite, Mukoojima, Hahajima Island group, southern Bonin  
486 (Ogasawara) forearc, Japan: *Island Arc*, v. 13, no. 3, p. 452-465.

487 Manning, C. E., 2004, The chemistry of subduction-zone fluids: *Earth and Planetary Science*  
488 *Letters*, v. 223, no. 1, p. 1-16.

489 McDade, P., Blundy, J. D., and Wood, B. J., 2003a, Trace element partitioning between mantle  
490 wedge peridotite and hydrous MgO-rich melt: *American Mineralogist*, v. 88, no. 11-12, p.  
491 1825-1831.

492 McDade, P., Blundy, J. D., and Wood, B. J., 2003b, Trace element partitioning on the  
493 Tinaquillo Lherzolite solidus at 1.5GPa: *Physics of the Earth and Planetary Interiors*, v.  
494 139, no. 1, p. 129-147.

495 McInnes, B. I. A., Gregoire, M., Binns, R. A., Herzig, P. M., and Hannington, M. D., 2001,  
496 Hydrous metasomatism of oceanic sub-arc mantle, Lihir, Papua New Guinea: petrology  
497 and geochemistry of fluid-metasomatised mantle wedge xenoliths: *Earth and Planetary*  
498 *Science Letters*, v. 188, no. 1, p. 169-183.

499 Niu, X., Yang, J., Dilek, Y., Xu, J., Li, J., Chen, S., Feng, G., Liu, F., Xiong, F., and Liu, Z.,  
500 2015, Petrological and Os isotopic constraints on the origin of the Dongbo peridotite

501        massif, Yarlung Zangbo Suture Zone, Western Tibet: *Journal of Asian Earth Sciences*, v.  
502        110, p. 72-84.

503    Niu, Y., 2004, Bulk-rock major and trace element compositions of abyssal peridotites:  
504        implications for mantle melting, melt extraction and post-melting processes beneath  
505        mid-ocean ridges: *Journal of Petrology*, v. 45, no. 12, p. 2423-2458.

506    Ohara, Y., and Ishii, T., 1998, Peridotites from the southern Mariana forearc: Heterogeneous  
507        fluid supply in mantle wedge: *Island Arc*, v. 7, no. 3, p. 541-558.

508    Okamura, H., Arai, S., and Kim, Y.-U., 2006, Petrology of forearc peridotite from the  
509        Hahajima Seamount, the Izu-Bonin arc, with special reference to chemical characteristics  
510        of chromian spinel: *Mineralogical Magazine*, v. 70, no. 1, p. 15-26.

511    Osozawa, S., Shinjo, R., Lo, C.-H., Jahn, B.-m., Hoang, N., Sasaki, M., Ishikawa, K. i., Kano,  
512        H., Hoshi, H., Xenophontos, C., and Wakabayashi, J., 2012, Geochemistry and  
513        geochronology of the Troodos ophiolite: An SSZ ophiolite generated by subduction  
514        initiation and an extended episode of ridge subduction?: *Lithosphere*, v. 4, no. 6, p.  
515        497-510.

516    Ota, T., Utsunomiya, A., Uchio, Y., Isozaki, Y., Buslov, M. M., Ishikawa, A., Maruyama, S.,  
517        Kitajima, K., Kaneko, Y., Yamamoto, H., and Katayama, I., 2007, Geology of the Gorny  
518        Altai subduction–accretion complex, southern Siberia: Tectonic evolution of an  
519        Ediacaran–Cambrian intra-oceanic arc-trench system: *Journal of Asian Earth Sciences*, v.  
520        30, no. 5, p. 666-695.

521    Pagé, P., Bédard, J. H., Schroetter, J.-M., and Tremblay, A., 2008, Mantle petrology and  
522        mineralogy of the Thetford Mines Ophiolite Complex: *Lithos*, v. 100, no. 1, p. 255-292.

523 Pagé, P., Bédard, J. H., and Tremblay, A., 2009, Geochemical variations in a depleted fore-arc  
524 mantle: The Ordovician Thetford Mines Ophiolite: *Lithos*, v. 113, no. 1, p. 21-47.

525 Parkinson, I. J., and Pearce, J. A., 1998, Peridotites from the Izu–Bonin–Mariana Forearc  
526 (ODP Leg 125): Evidence for Mantle Melting and Melt–Mantle Interaction in a  
527 Supra-Subduction Zone Setting: *Journal of Petrology*, v. 39, no. 9, p. 1577-1618.

528 Pearce, J. A., Barker, P., Edwards, S., Parkinson, I. J., and Leat, P., 2000, Geochemistry and  
529 tectonic significance of peridotites from the South Sandwich arc–basin system, South  
530 Atlantic: *Contributions to Mineralogy and Petrology*, v. 139, no. 1, p. 36-53.

531 Pearce, J. A., Stern, R. J., Bloomer, S. H., and Fryer, P., 2005, Geochemical mapping of the  
532 Mariana arc-basin system: Implications for the nature and distribution of subduction  
533 components: *Geochemistry, Geophysics, Geosystems*, v. 6, no. 7.

534 Pirard, C., Hermann, J., and O'Neill, H. S. T. C., 2013, Petrology and Geochemistry of the  
535 Crust–Mantle Boundary in a Nascent Arc, Massif du Sud Ophiolite, New Caledonia, SW  
536 Pacific: *Journal of Petrology*, v. 54, no. 9, p. 1759-1792.

537 Reagan, M. K., Ishizuka, O., Stern, R. J., Kelley, K. A., Ohara, Y., Blichert-Toft, J., Bloomer,  
538 S. H., Cash, J., Fryer, P., Hanan, B. B., Hickey-Vargas, R., Ishii, T., Kimura, J.-I., Peate,  
539 D. W., Rowe, M. C., and Woods, M., 2010, Fore-arc basalts and subduction initiation in  
540 the Izu-Bonin-Mariana system: *Geochemistry, Geophysics, Geosystems*, v. 11, no. 3.

541 Salters, V. J. M., and Stracke, A., 2004, Composition of the depleted mantle: *Geochemistry,*  
542 *Geophysics, Geosystems*, v. 5, no. 5.

543 Scholpp, J. L., Ryan, J. G., Shervais, J. W., Stremtan, C., Rittner, M., Luna, A., Hill, S. A.,  
544 Atlas, Z. D., and Mack, B. C., 2022, Petrologic evolution of boninite lavas from the IBM

545 Fore-arc, IODP Expedition 352: Evidence for open-system processes during early  
546 subduction zone magmatism: *American Mineralogist*, v. 107, no. 4, p. 572-586.

547 Secchiari, A., Montanini, A., Bosch, D., Macera, P., and Cluzel, D., 2020, Sr, Nd, Pb and trace  
548 element systematics of the New Caledonia harzburgites: Tracking source depletion and  
549 contamination processes in a SSZ setting: *Geoscience Frontiers*, v. 11, no. 1, p. 37-55.

550 Shervais, J. W., Reagan, M. K., Godard, M., Prytulak, J., Ryan, J. G., Pearce, J. A., Almeev, R.  
551 R., Li, H., Haugen, E., Chapman, T., Kurz, W., Nelson, W. R., Heaton, D. E.,  
552 Kirchenbaur, M., Shimizu, K., Sakuyama, T., Vetter, S. K., Li, Y., and Whattam, S., 2021,  
553 Magmatic Response to Subduction Initiation, Part II: Boninites and Related Rocks of the  
554 Izu-Bonin Arc From IODP Expedition 352: *Geochemistry, Geophysics, Geosystems*, v.  
555 22, no. 1, p. e2020GC009093.

556 Shervais, J. W., Reagan, M., Haugen, E., Almeev, R. R., Pearce, J. A., Prytulak, J., Ryan, J. G.,  
557 Whattam, S. A., Godard, M., Chapman, T., Li, H., Kurz, W., Nelson, W. R., Heaton, D.,  
558 Kirchenbaur, M., Shimizu, K., Sakuyama, T., Li, Y., and Vetter, S. K., 2019, Magmatic  
559 Response to Subduction Initiation: Part 1. Fore-arc Basalts of the Izu-Bonin Arc From  
560 IODP Expedition 352: *Geochemistry, Geophysics, Geosystems*, v. 20, no. 1, p. 314-338.

561 Shi, R., Yang, J., Xu, Z., and Qi, X., 2008, The Bangong Lake ophiolite (NW Tibet) and its  
562 bearing on the tectonic evolution of the Bangong–Nujiang suture zone: *Journal of Asian*  
563 *Earth Sciences*, v. 32, no. 5, p. 438-457.

564 Smith, P. M., and Asimow, P. D., 2005, *Adiabat\_1ph*: A new public front-end to the MELTS,  
565 *pMELTS*, and *pHMEELTS* models: *Geochemistry, Geophysics, Geosystems*, v. 6, no. 2.

566 Sobolev, A. V., and Danyushevsky, L. V., 1994, Petrology and Geochemistry of Boninites

567 from the North Termination of the Tonga Trench: Constraints on the Generation  
568 Conditions of Primary High-Ca Boninite Magmas: *Journal of Petrology*, v. 35, no. 5, p.  
569 1183-1211.

570 Song, S., Su, L., Niu, Y., Lai, Y., and Zhang, L., 2009, CH<sub>4</sub> inclusions in orogenic harzburgite:  
571 Evidence for reduced slab fluids and implication for redox melting in mantle wedge:  
572 *Geochimica et Cosmochimica Acta*, v. 73, no. 6, p. 1737-1754.

573 Streckeisen, A., 1976, To each plutonic rock its proper name: *Earth-Science Reviews*, v. 12,  
574 no. 1, p. 1-33.

575 Sun, S. S., and McDonough, W. F., 1989, Chemical and isotopic systematics of oceanic basalts:  
576 Implications for mantle composition and source processes: *Geological Society of*  
577 *London, Special Publication*, v. 42, no. 1, p. 313-345.

578 Syracuse, E. M., van Keken, P. E., and Abers, G. A., 2010, The global range of subduction  
579 zone thermal models: *Physics of the Earth and Planetary Interiors*, v. 183, no. 1, p. 73-90.

580 Taylor, R. N., Nesbitt, R. W., Vidal, P., Harmon, R. S., Auvray, B., and Croudace, I. W., 1994,  
581 Mineralogy, Chemistry, and Genesis of the Boninite Series Volcanics, Chichijima, Bonin  
582 Islands, Japan: *Journal of Petrology*, v. 35, no. 3, p. 577-617.

583 Tollan, P. M. E., Dale, C., Hermann, J., Davidson, J., and Arculus, R., 2017, Generation and  
584 modification of the mantle wedge and lithosphere beneath the West Bismarck island arc:  
585 melting, metasomatism and thermal history of peridotite xenoliths from Ritter island:  
586 *Journal of petrology*, v. 58, no. 8, p. 1475-1510.

587 Ulrich, M., Picard, C., Guillot, S., Chauvel, C., Cluzel, D., and Meffre, S., 2010, Multiple  
588 melting stages and refertilization as indicators for ridge to subduction formation: The

589 New Caledonia ophiolite: *Lithos*, v. 115, no. 1-4, p. 223-236.

590 Umino, S., 1986, Magma mixing in boninite sequence of Chichijima, Bonin Islands: *Journal*  
591 *of Volcanology and Geothermal Research*, v. 29, no. 1, p. 125-157.

592 Uysal, İ., Ersoy, E. Y., Karşlı, O., Dilek, Y., Sadıklar, M. B., Ottley, C. J., Tiepolo, M., and  
593 Meisel, T., 2012, Coexistence of abyssal and ultra-depleted SSZ type mantle peridotites  
594 in a Neo-Tethyan Ophiolite in SW Turkey: Constraints from mineral composition,  
595 whole-rock geochemistry (major–trace–REE–PGE), and Re–Os isotope systematics:  
596 *Lithos*, v. 132-133, p. 50-69.

597 Uysal, İ., Şen, A. D., Ersoy, E. Y., Dilek, Y., Saka, S., Zaccarini, F., Escayola, M., and Karşlı,  
598 O., 2014, Geochemical make-up of oceanic peridotites from NW Turkey and the  
599 multi-stage melting history of the Tethyan upper mantle: *Mineralogy and Petrology*, v.  
600 108, no. 1, p. 49-69.

601 Uysal, I. b. m., Kaliwoda, M., Karşlı, O., Tarkian, M., Sadıklar, M. B., and Ottley, C. J., 2007,  
602 Compositional variations as a result of partial melting and melt-peridotite interaction in  
603 an upper mantle section from the Ortaca area, southwestern Turkey: *The Canadian*  
604 *Mineralogist*, v. 45, no. 6, p. 1471-1493.

605 Van der Laan, S. R., Arculus, R., Pearce, J., Murton, B., and Fryer, P., Petrography, mineral  
606 chemistry, and phase relations of the basement boninite series of Site 786, Izu-Bonin  
607 forearc, in *Proceedings of the ocean drilling program, scientific results 1992*,  
608 Volume 125, College Station: Texas, p. 171-201.

609 Walter, M. J., 1998, Melting of Garnet Peridotite and the Origin of Komatiite and Depleted  
610 Lithosphere: *Journal of Petrology*, v. 39, no. 1, p. 29-60.

611 Warren, J. M., 2016, Global variations in abyssal peridotite compositions: *Lithos*, v. 248-251,  
612 p. 193-219.

613 Whattam, S. A., Shervais, J. W., Reagan, M. K., Coulthard, D. A., Pearce, J. A., Jones, P., Seo,  
614 J., Putirka, K., Chapman, T., Heaton, D., Li, H., Nelson, W. R., Shimizu, K., and Stern, R.  
615 J., 2020, Mineral compositions and thermobarometry of basalts and boninites recovered  
616 during IODP Expedition 352 to the Bonin forearc, v. 105, no. 10, p. 1490-1507.

617 Woodland, S. J., Pearson, D. G., and Thirlwall, M. F., 2002, A Platinum Group Element and  
618 Re–Os Isotope Investigation of Siderophile Element Recycling in Subduction Zones:  
619 Comparison of Grenada, Lesser Antilles Arc, and the Izu–Bonin Arc: *Journal of*  
620 *Petrology*, v. 43, no. 1, p. 171-198.

621 Xiong, F., Yang, J., Robinson, P. T., Dilek, Y., Milushi, I., Xu, X., Chen, Y., Zhou, W., Zhang,  
622 Z., Lai, S., Tian, Y., and Huang, Z., 2015, Petrology and geochemistry of high Cr#  
623 podiform chromitites of Bulqiza, Eastern Mirdita Ophiolite (EMO), Albania: *Ore*  
624 *Geology Reviews*, v. 70, p. 188-207.

625 Xiong, F., Yang, J., Robinson, P. T., Xu, X., Liu, Z., Zhou, W., Feng, G., Xu, J., Li, J., and Niu,  
626 X., 2017, High-Al and high-Cr podiform chromitites from the western Yarlung-Zangbo  
627 suture zone, Tibet: Implications from mineralogy and geochemistry of chromian spinel,  
628 and platinum-group elements: *Ore Geology Reviews*, v. 80, p. 1020-1041.

629 Xiong, Q., Griffin, W. L., Zheng, J.-P., O'Reilly, S. Y., Pearson, N. J., Xu, B., and Belousova,  
630 E. A., 2016, Southward trench migration at ~130–120 Ma caused accretion of the  
631 Neo-Tethyan forearc lithosphere in Tibetan ophiolites: *Earth and Planetary Science*  
632 *Letters*, v. 438, p. 57-65.

633 Yajima, K., and Fujimaki, H., 2008, High-Ca and low-Ca boninites from Chichijima, Bonin  
634 (Ogasawara) archipelago: Japanese Magazine of Mineralogical and Petrological Sciences,  
635 v. 30, p. 217-236.

636 Zhang, P.-F., Zhou, M.-F., and Yumul, G. P., 2020, Coexistence of high-Al and high-Cr  
637 chromite orebodies in the Acoje block of the Zambales ophiolite, Philippines: Evidence  
638 for subduction initiation: Ore Geology Reviews, v. 126, p. 103739.

639 Zhou, X., Zheng, J., Li, Y., Zhu, H., Griffin, W. L., and O'Reilly, S. Y., 2021, Melt Migration  
640 and Interaction in a Dunite Channel System within Oceanic Forearc Mantle: the  
641 Yushigou Harzburgite–Dunite Associations, North Qilian Ophiolite (NW China): Journal  
642 of Petrology, v. 62, no. 7, p. egaal15.

643 Zou, H., and Reid, M. R., 2001, Quantitative modeling of trace element fractionation during  
644 incongruent dynamic melting: Geochimica et Cosmochimica Acta, v. 65, no. 1, p.  
645 153-162.



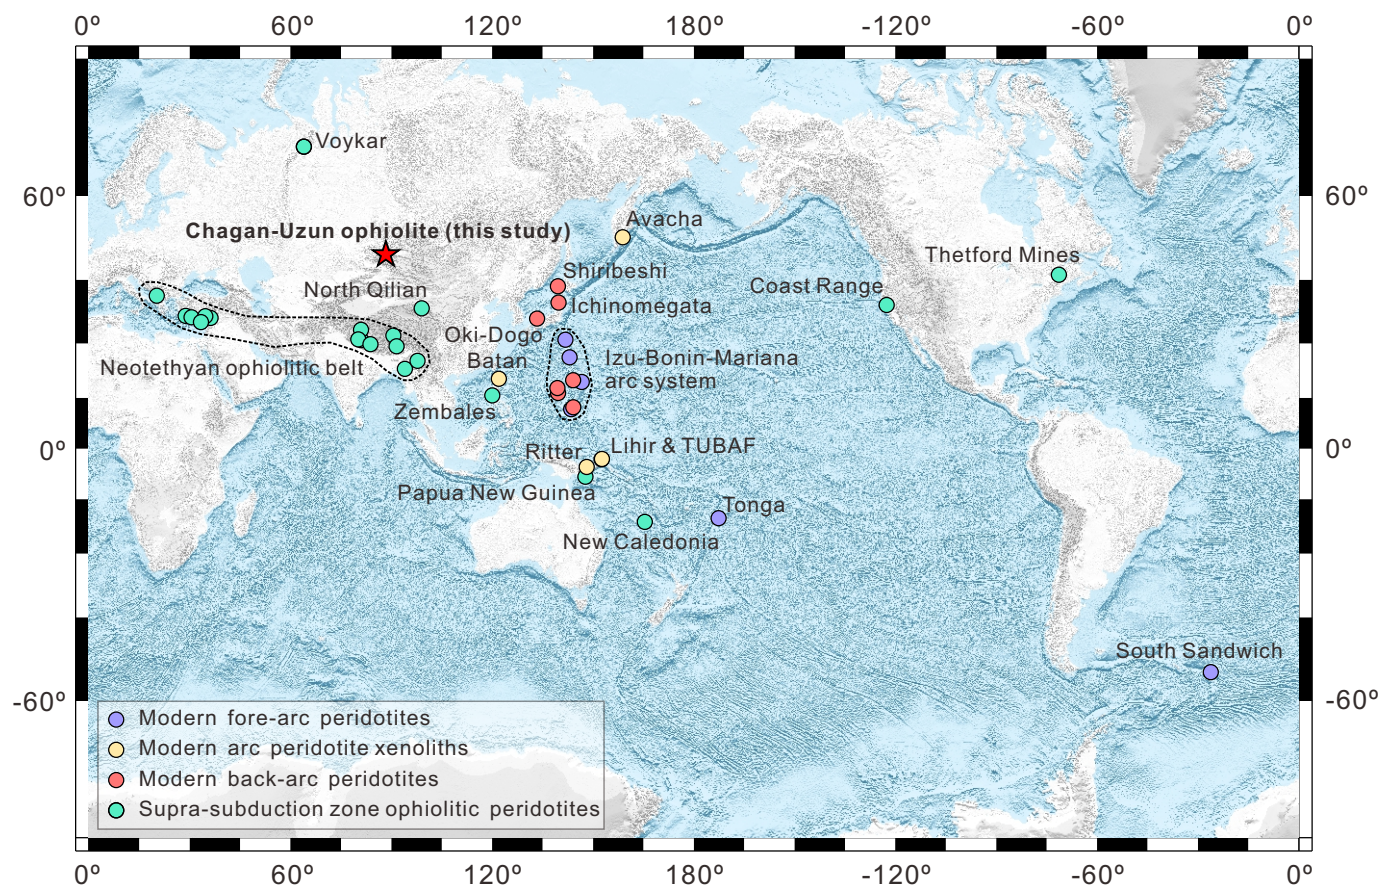

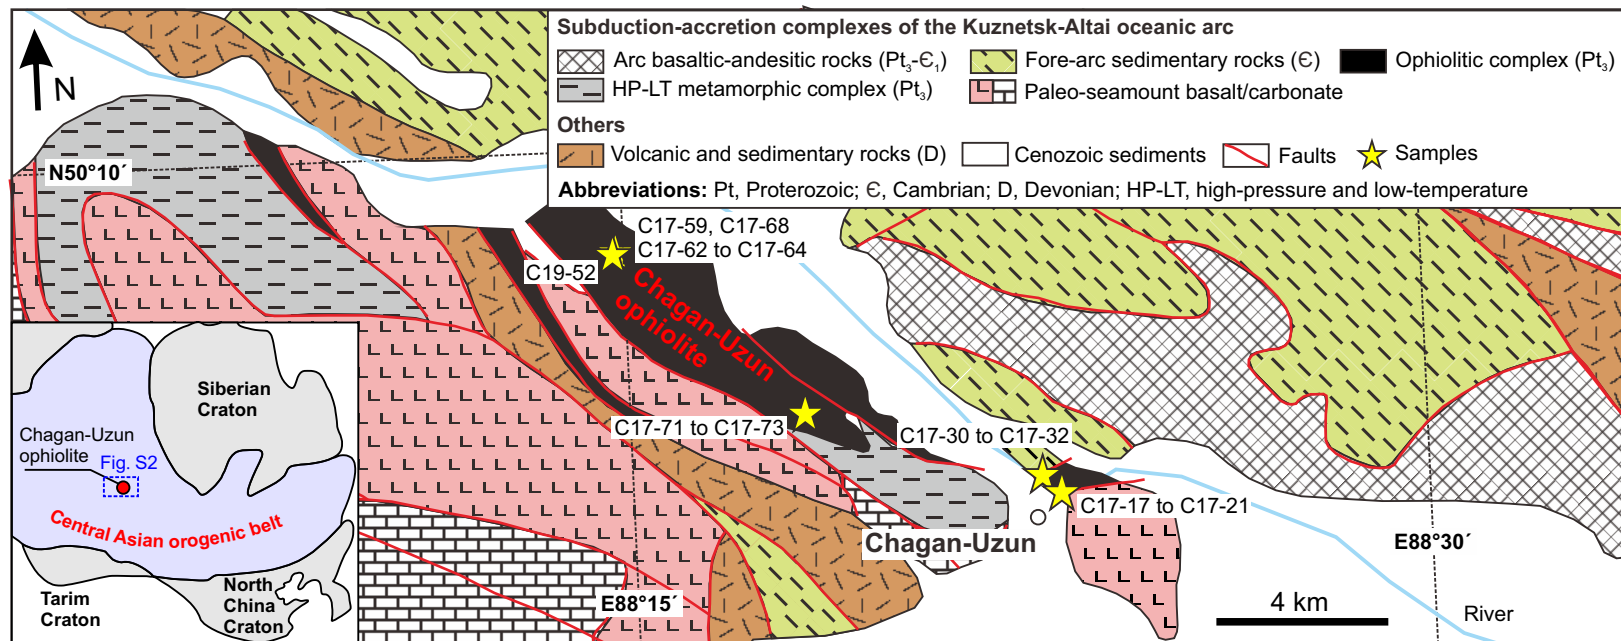



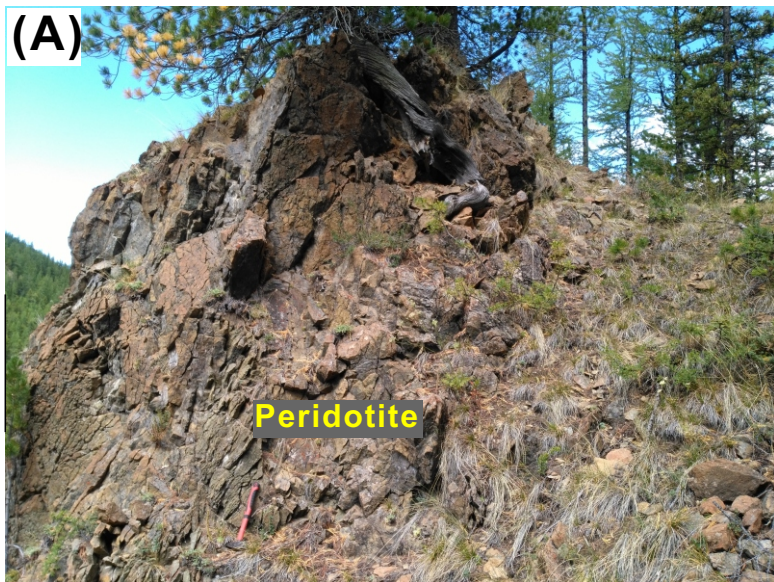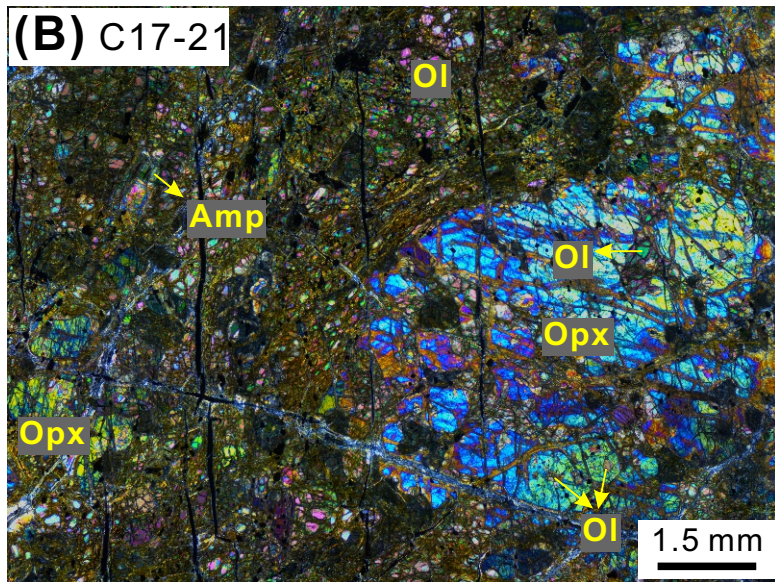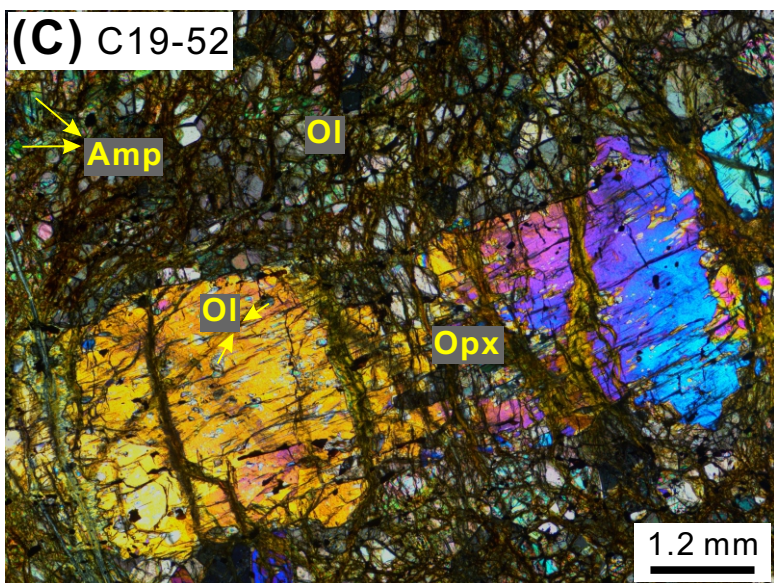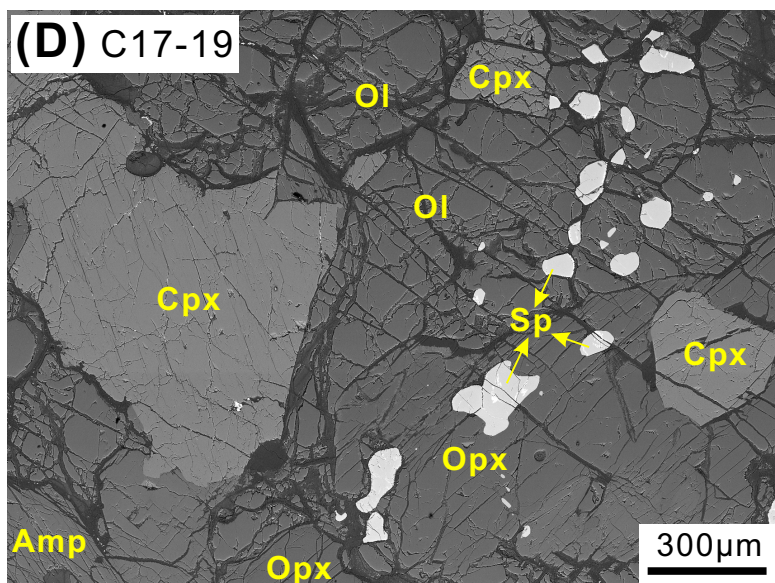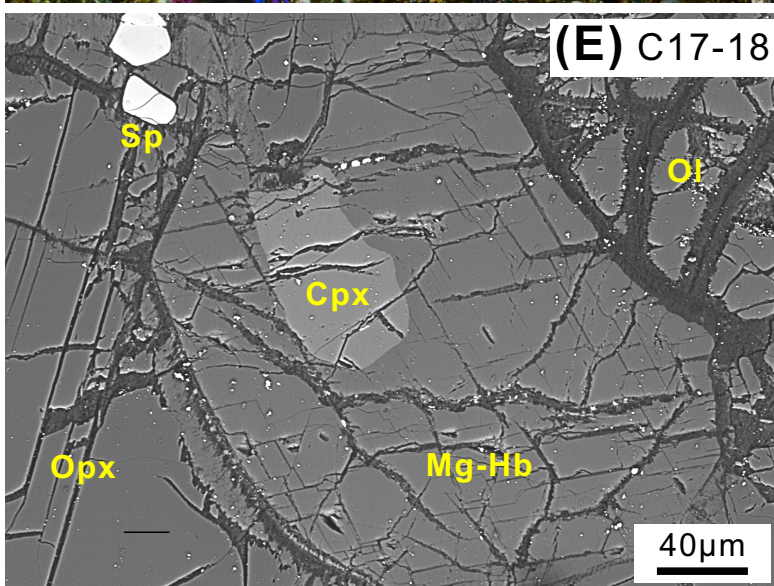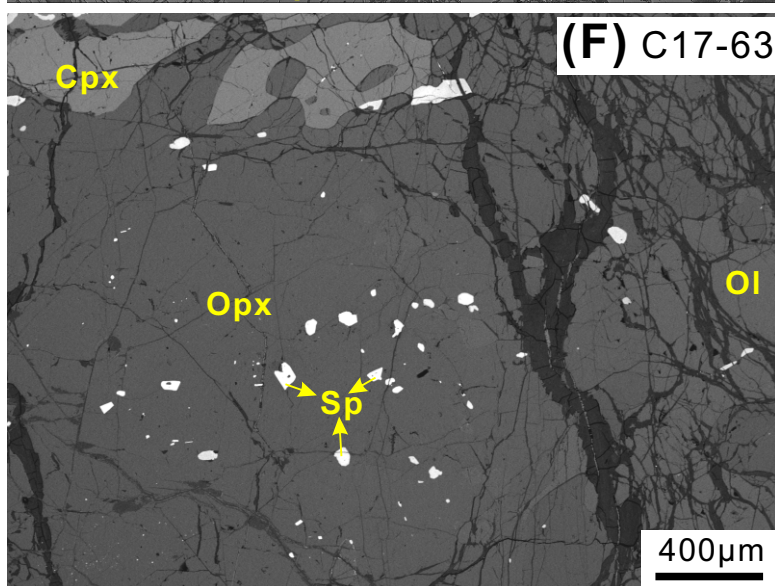



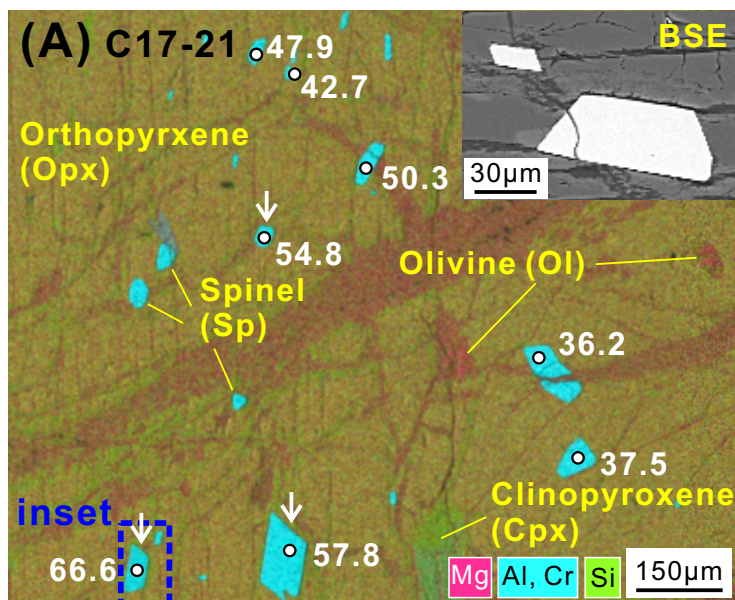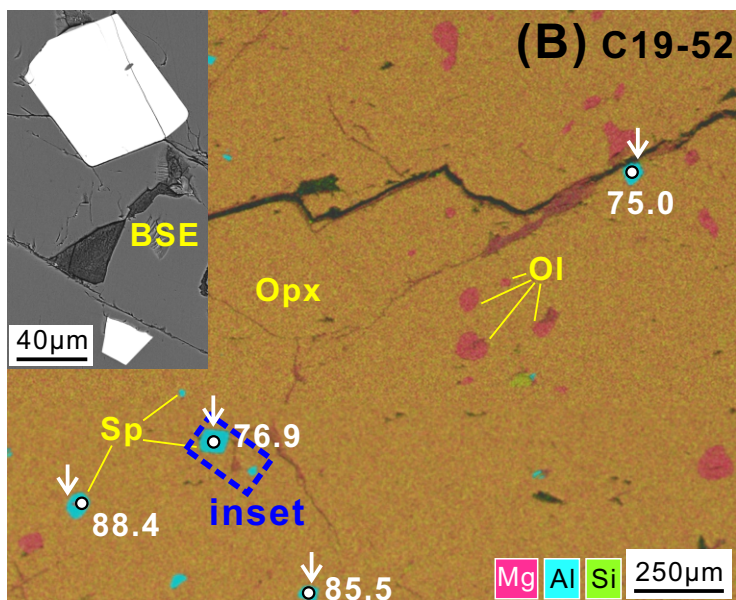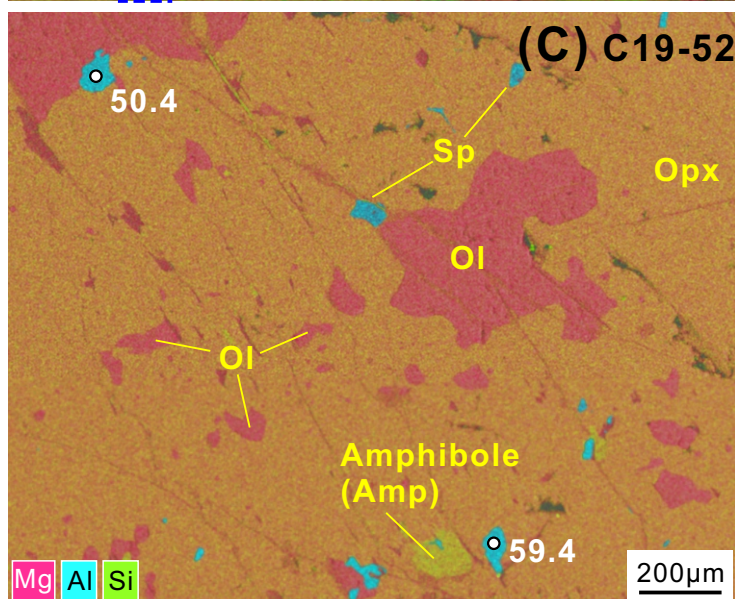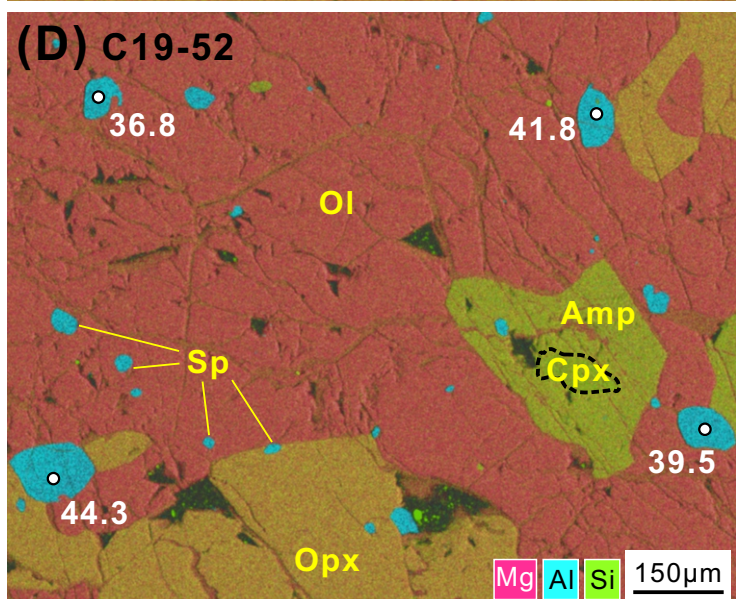

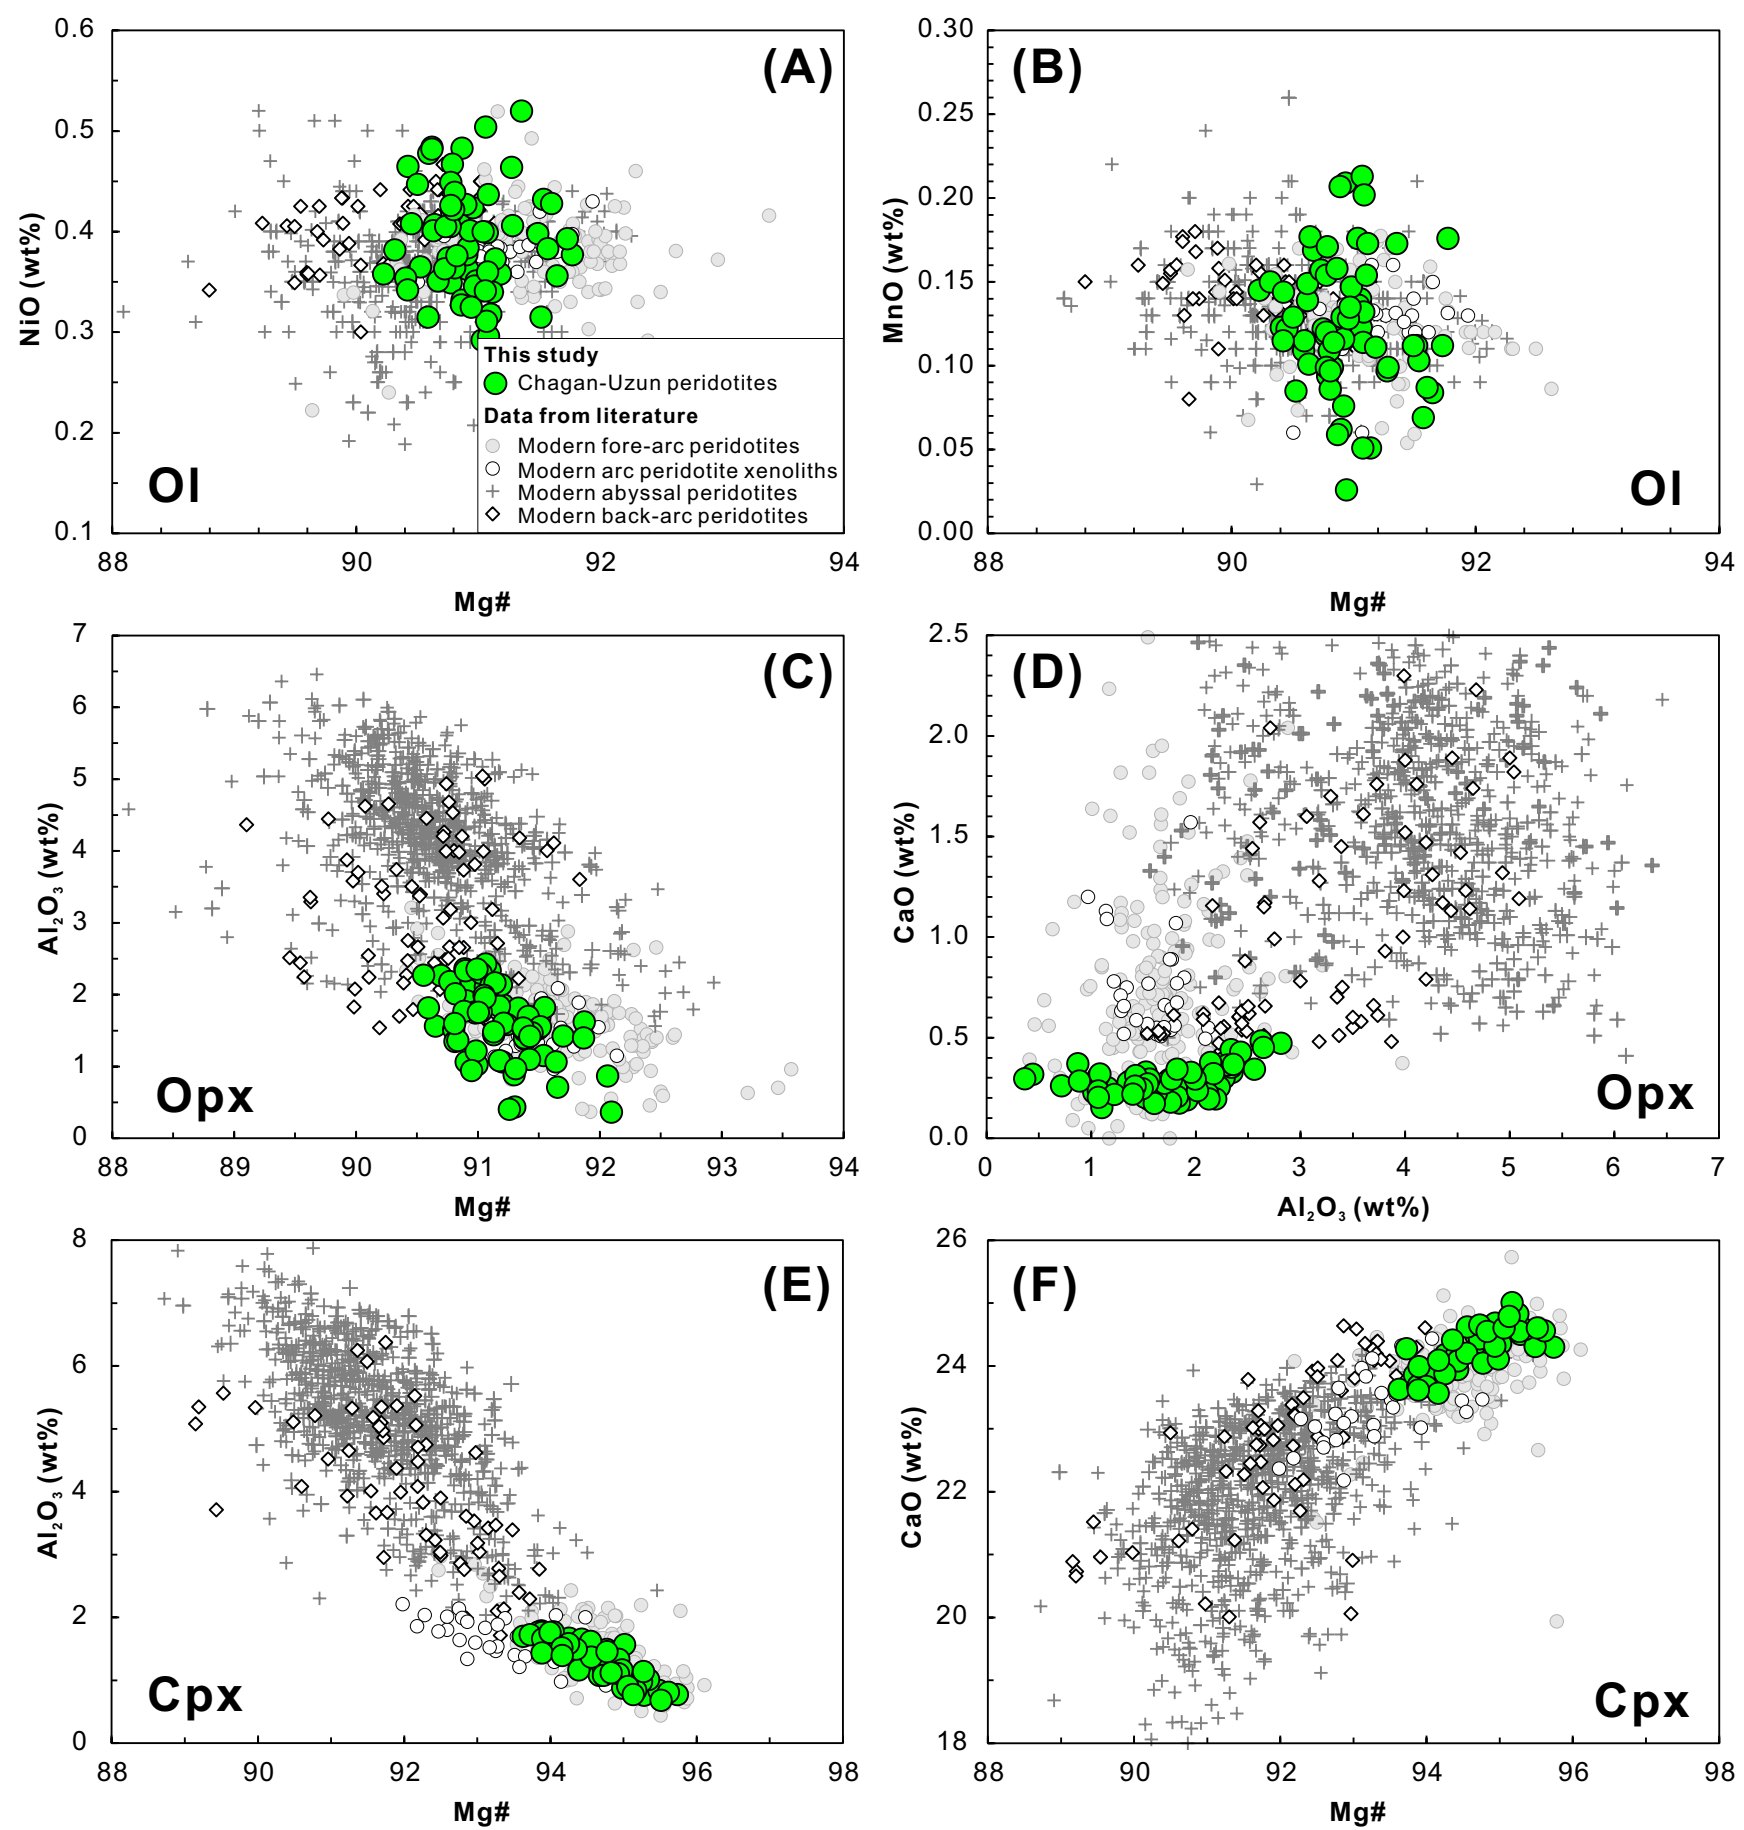

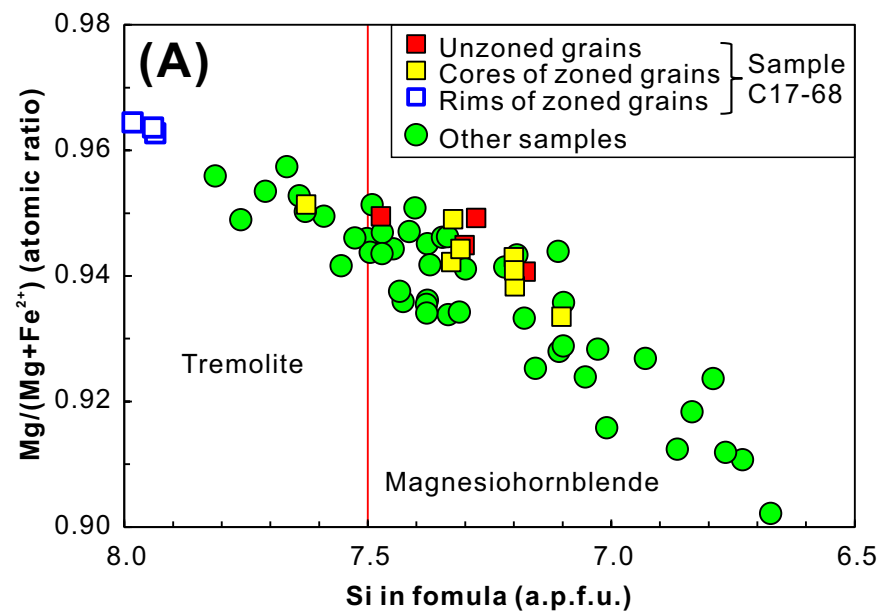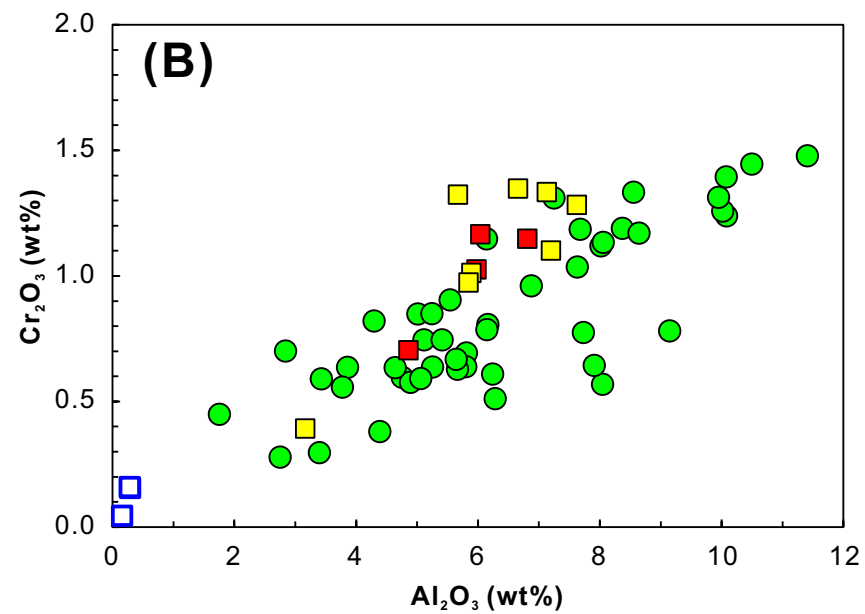

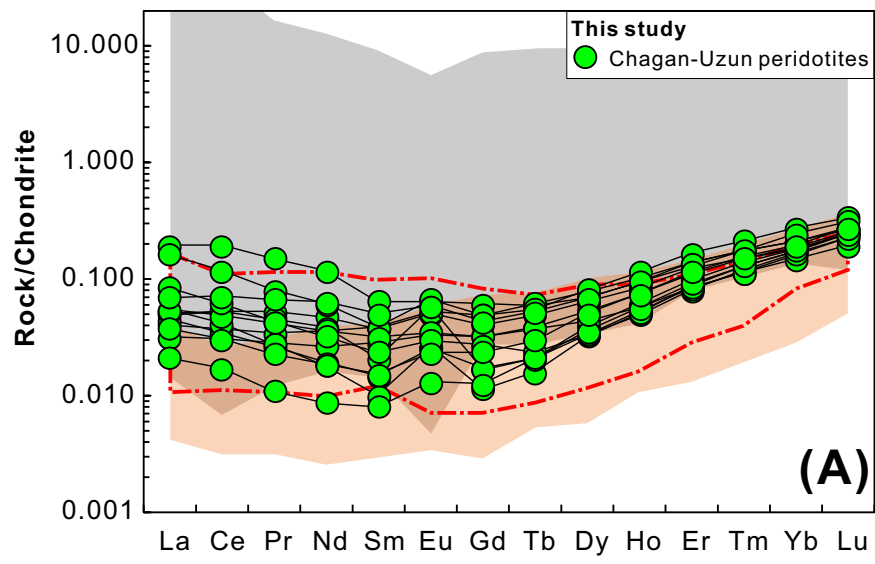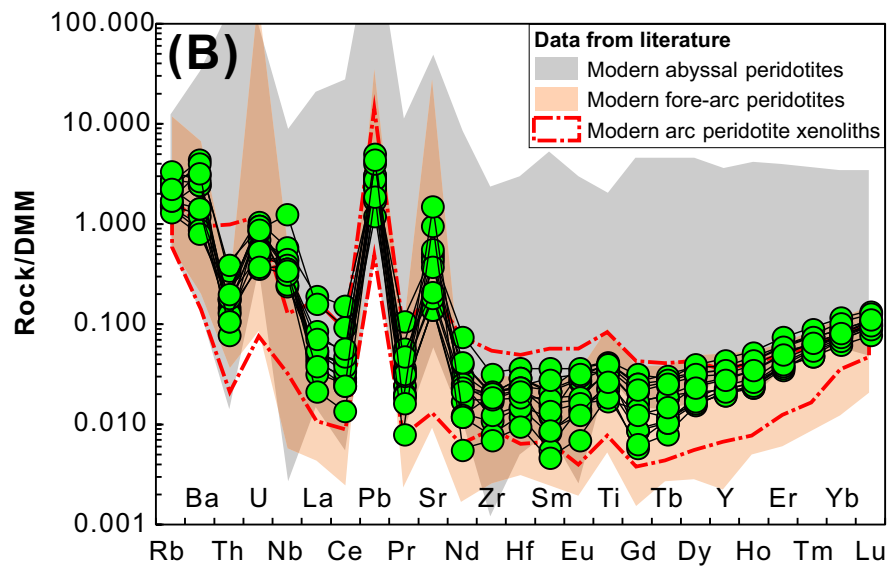



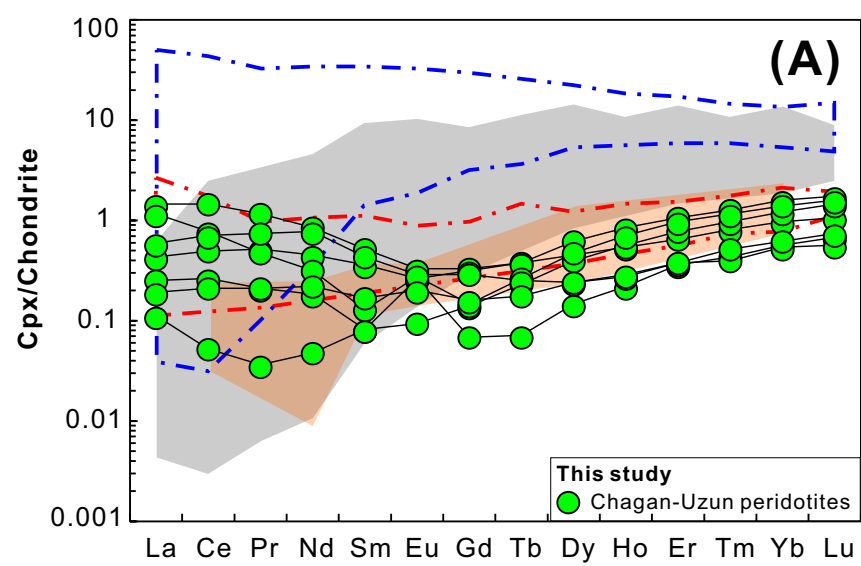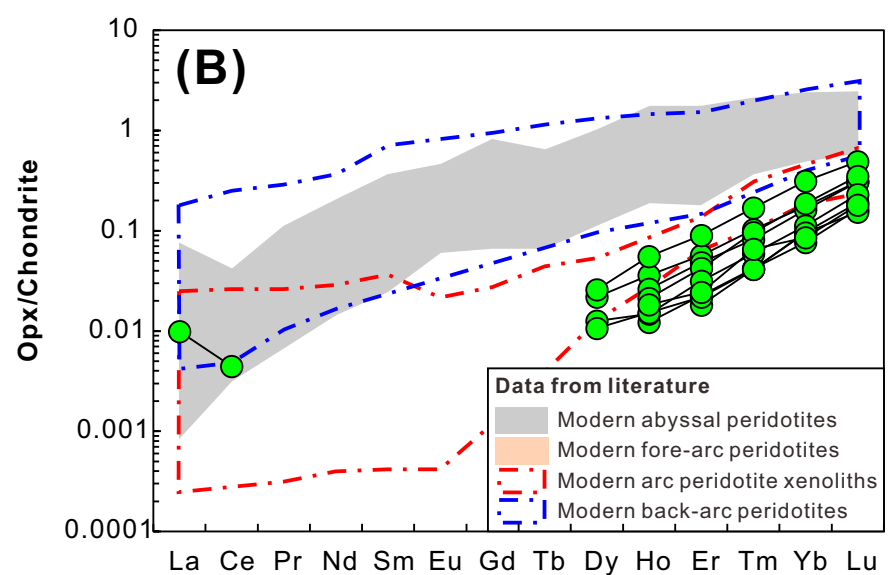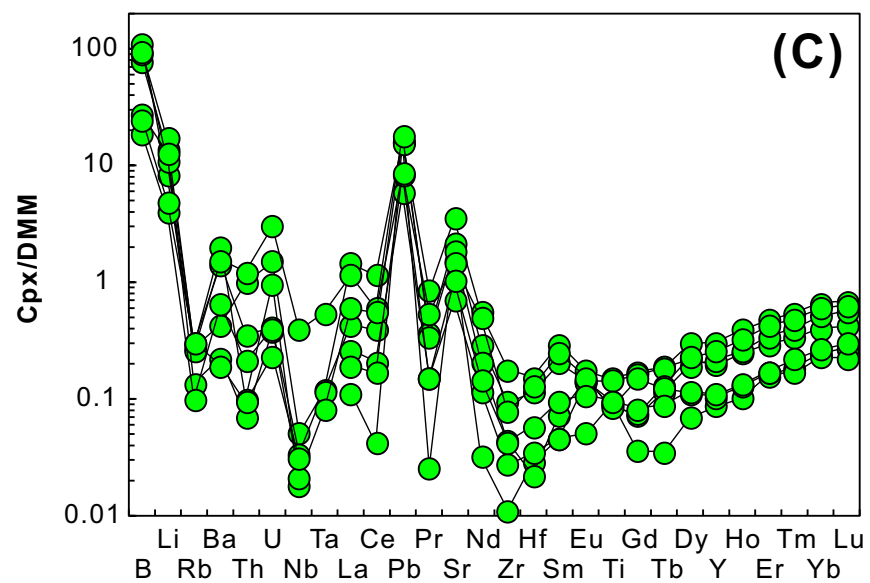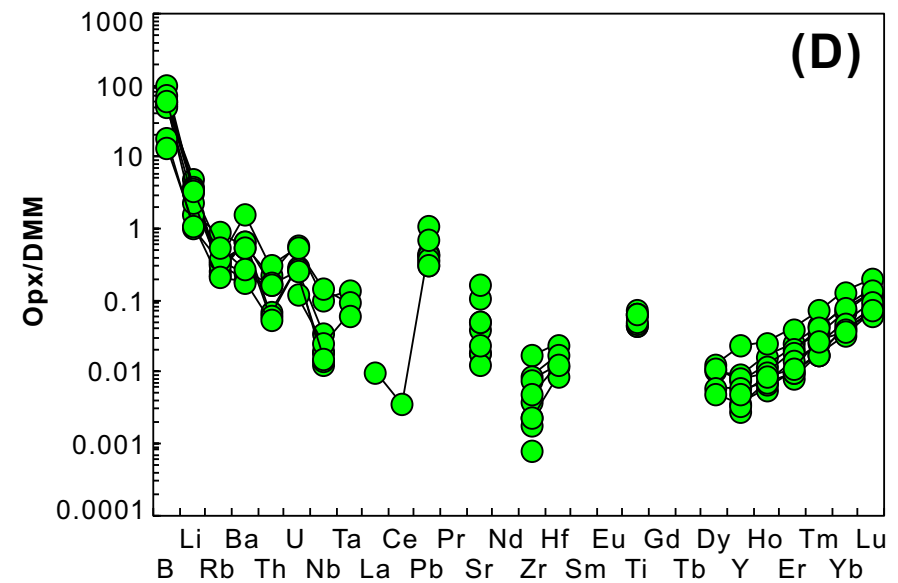



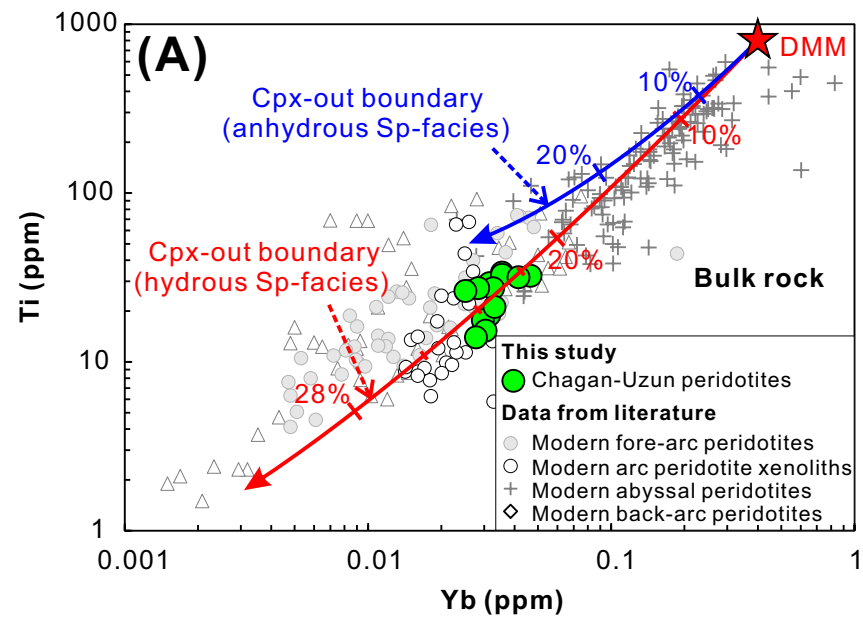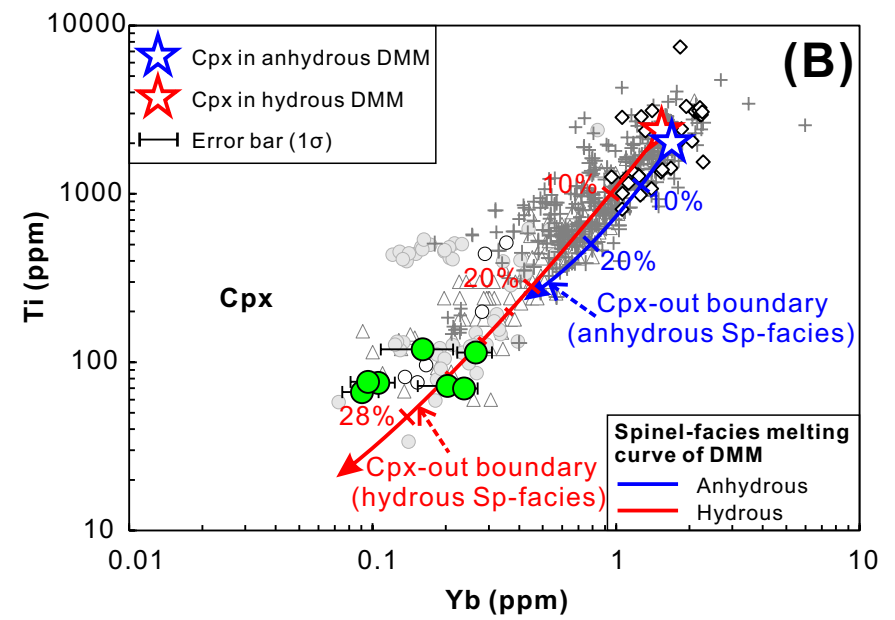

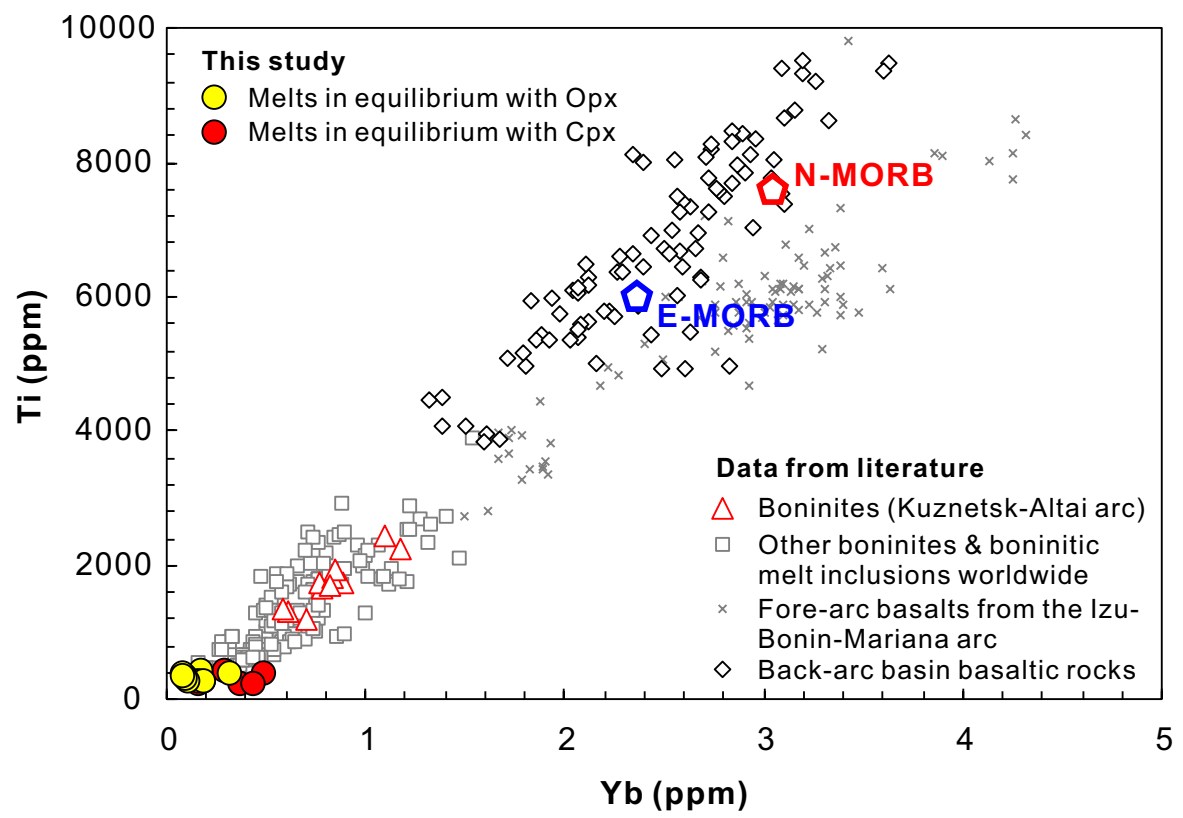

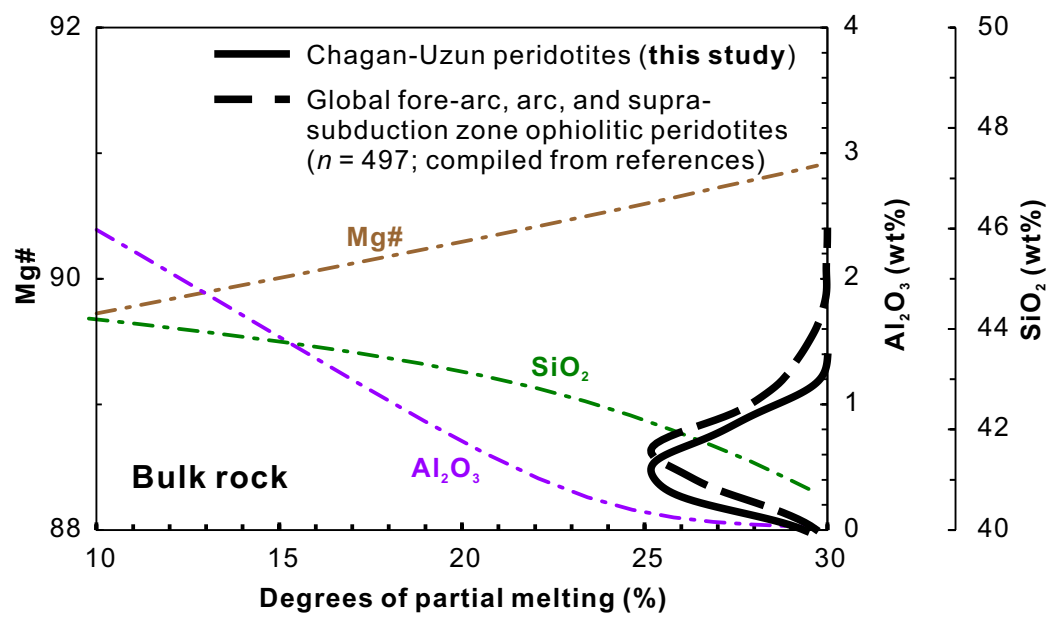

**Description of Additional Supplementary Files:**

**Supplementary Table S1:** Summary of locations and petrological data of peridotites from the Chagan-Uzun ophiolite

**Supplementary Table S2:** Bulk-rock major-element compositions (wt%) of peridotites from the Chagan-Uzun ophiolite

**Supplementary Table S3:** Trace-element compositions (ppm) of peridotites from the Chagan-Uzun ophiolite

**Supplementary Table S4:** Mineral major-element compositions (wt%) of peridotites from the Chagan-Uzun ophiolite

**Supplementary Table S5:** Clinopyroxene and orthopyroxene trace-element compositions (ppm) of peridotites from the Chagan-Uzun ophiolite

**Supplementary Table S6:** The pressure-temperature conditions and compositions of starting materials used in the modeling of hydrous fluxing melting and peridotite-melt interaction

**Supplementary Table S7:** Modeling results of isothermal fluxing melting and

isenthalpic boninitic melt percolation

Sample C17-17

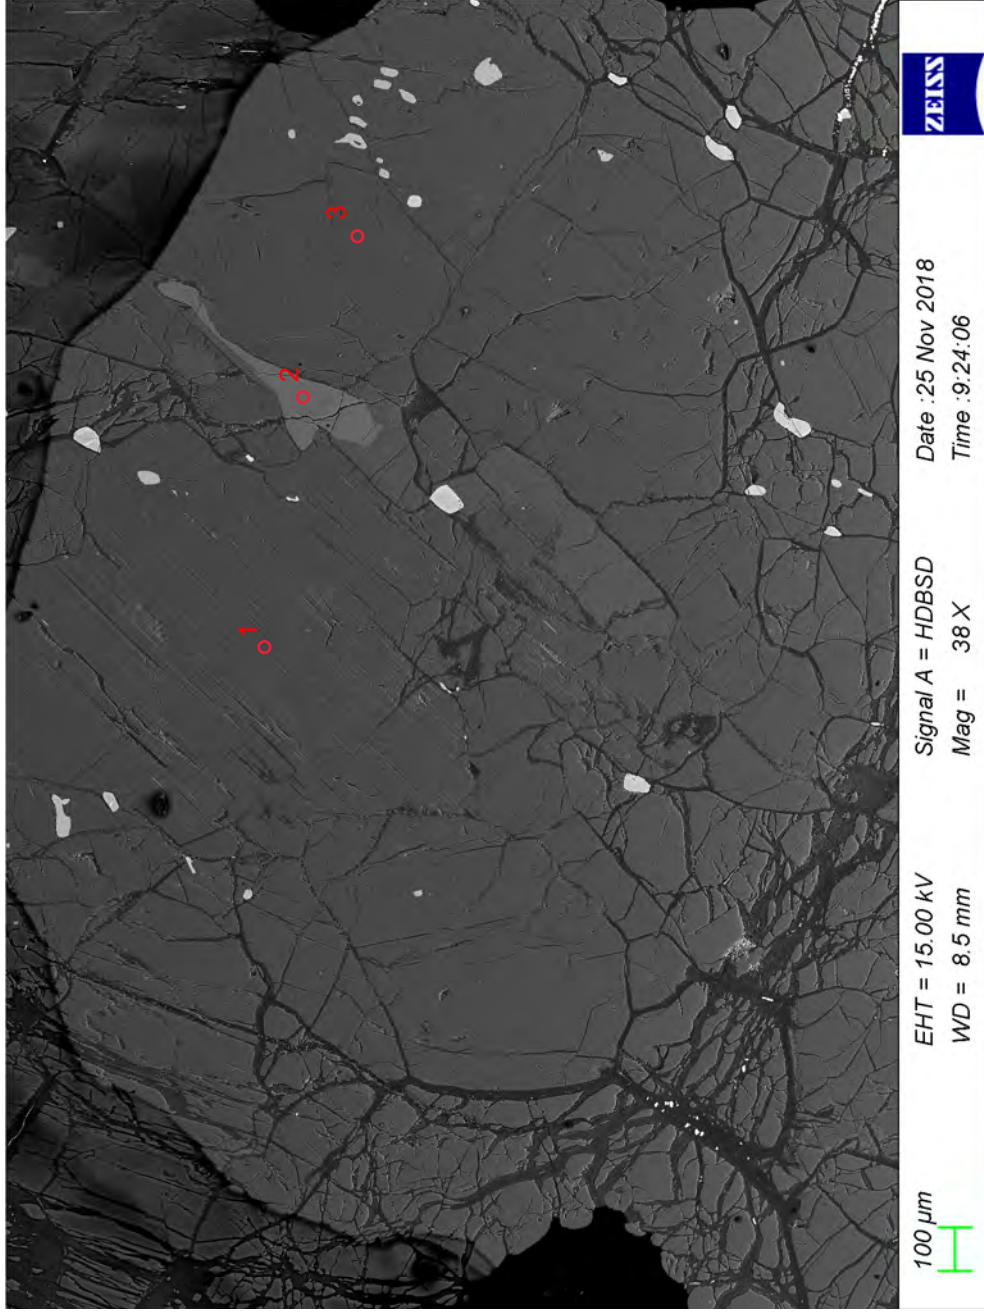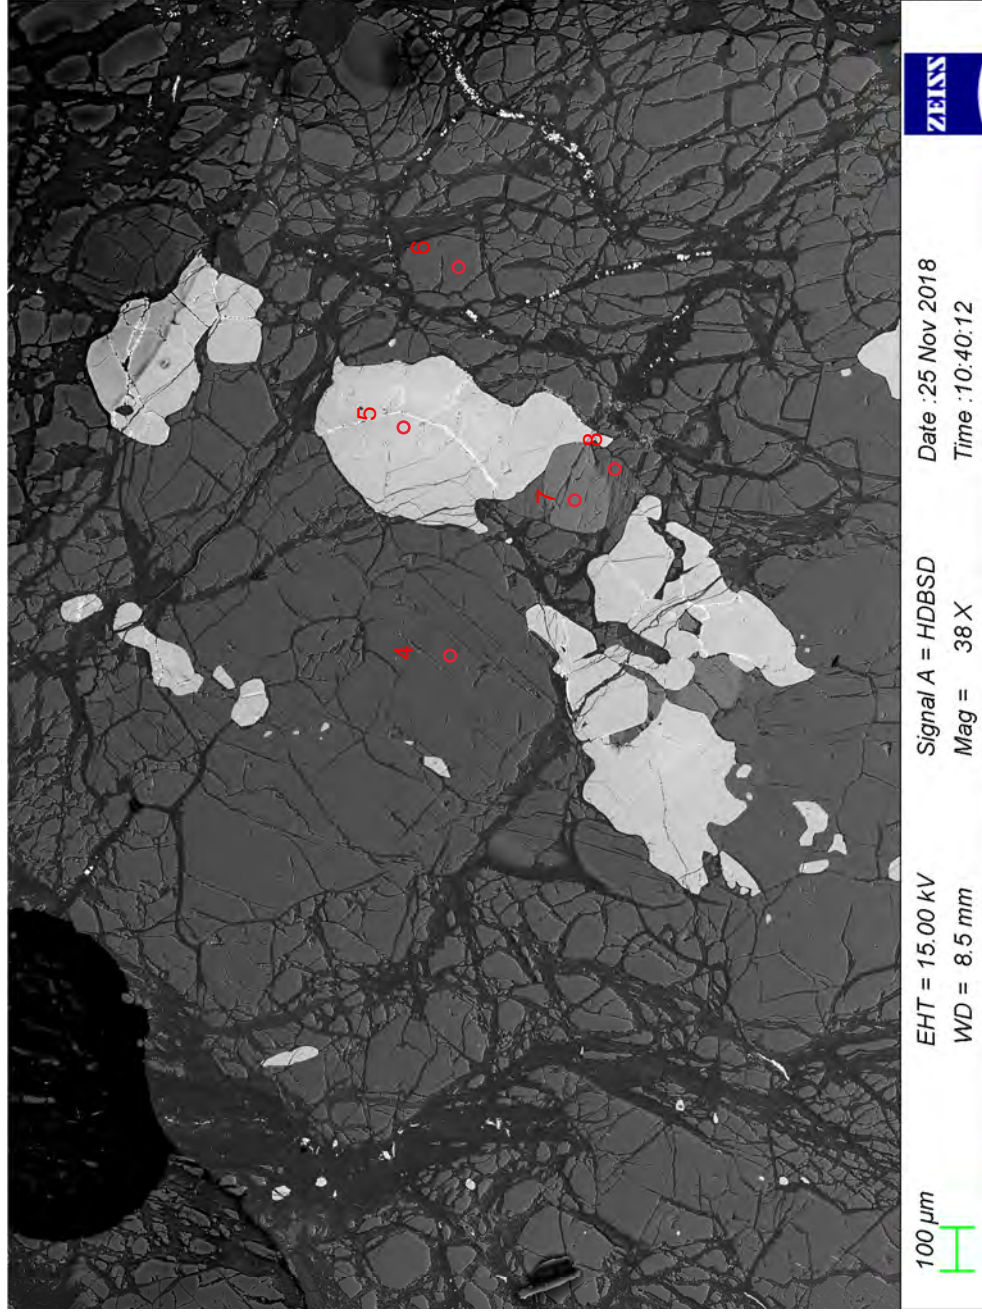



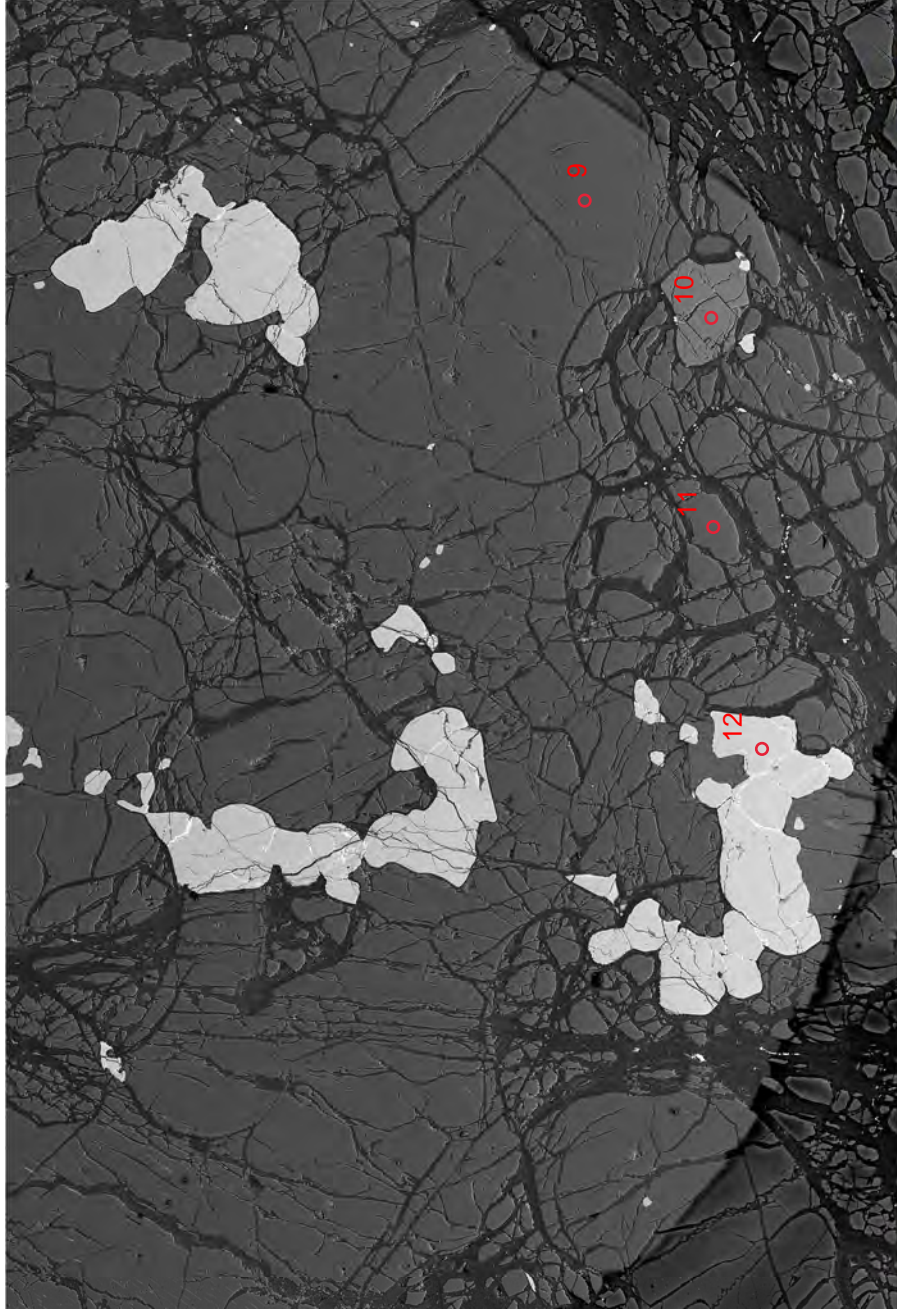

100  $\mu\text{m}$

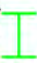

EHT = 15.00 kV  
WD = 8.5 mm

Signal A = HDBSD  
Mag = 38 X

Date :25 Nov 2018  
Time :11:00:31

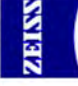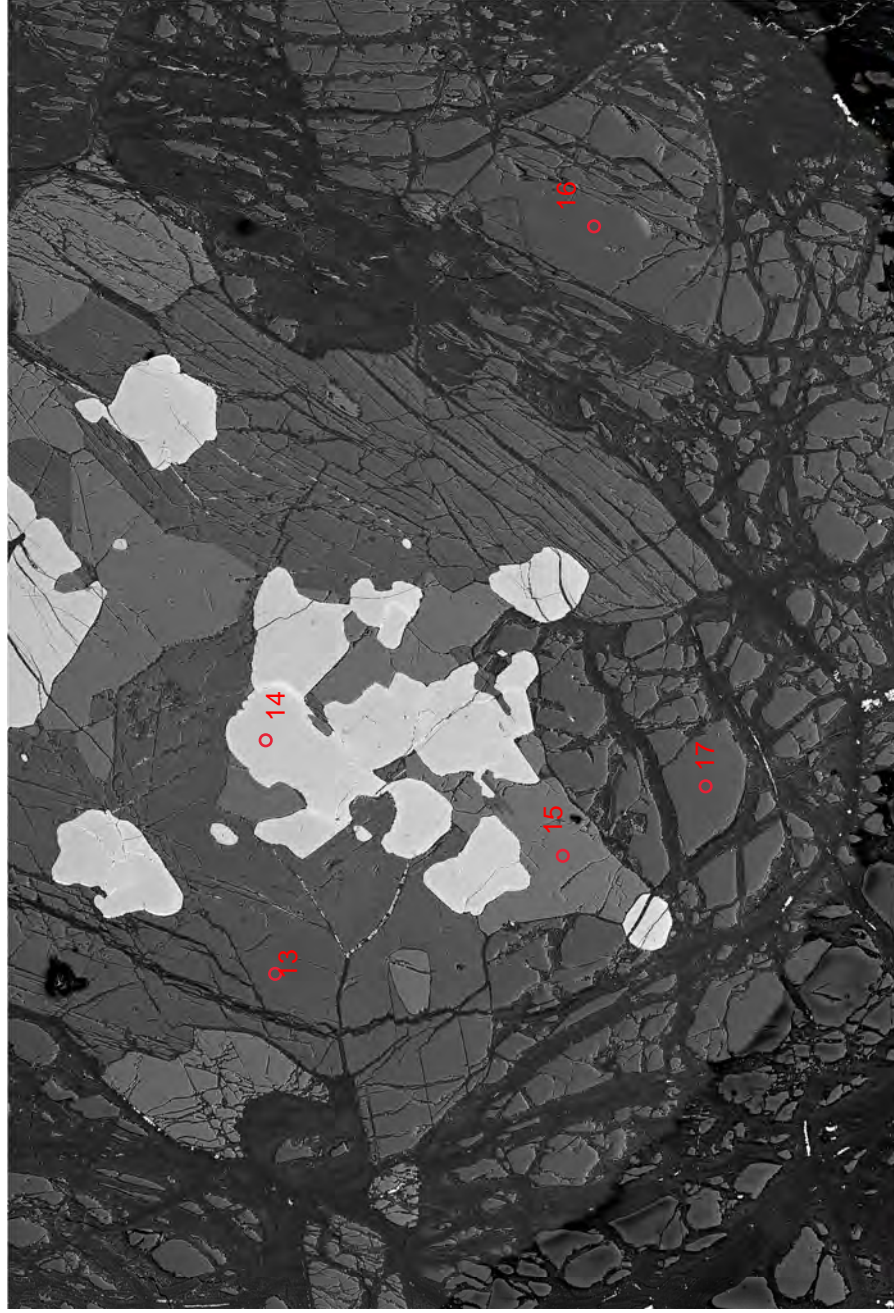

100  $\mu\text{m}$

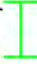

EHT = 15.00 kV  
WD = 8.5 mm

Signal A = HDBSD  
Mag = 48 X

Date :25 Nov 2018  
Time :11:10:26

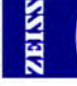



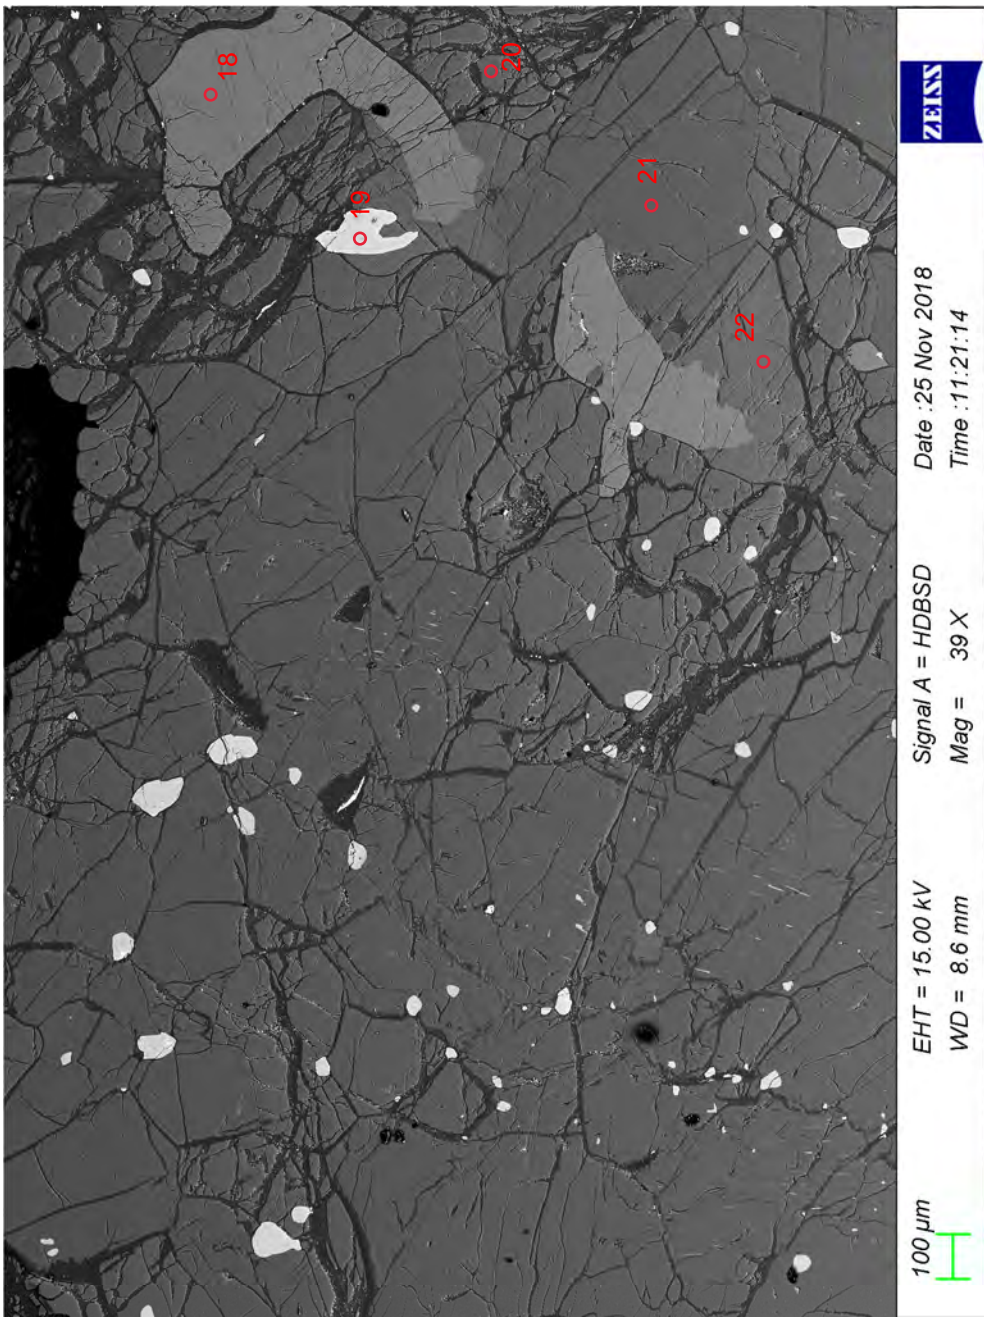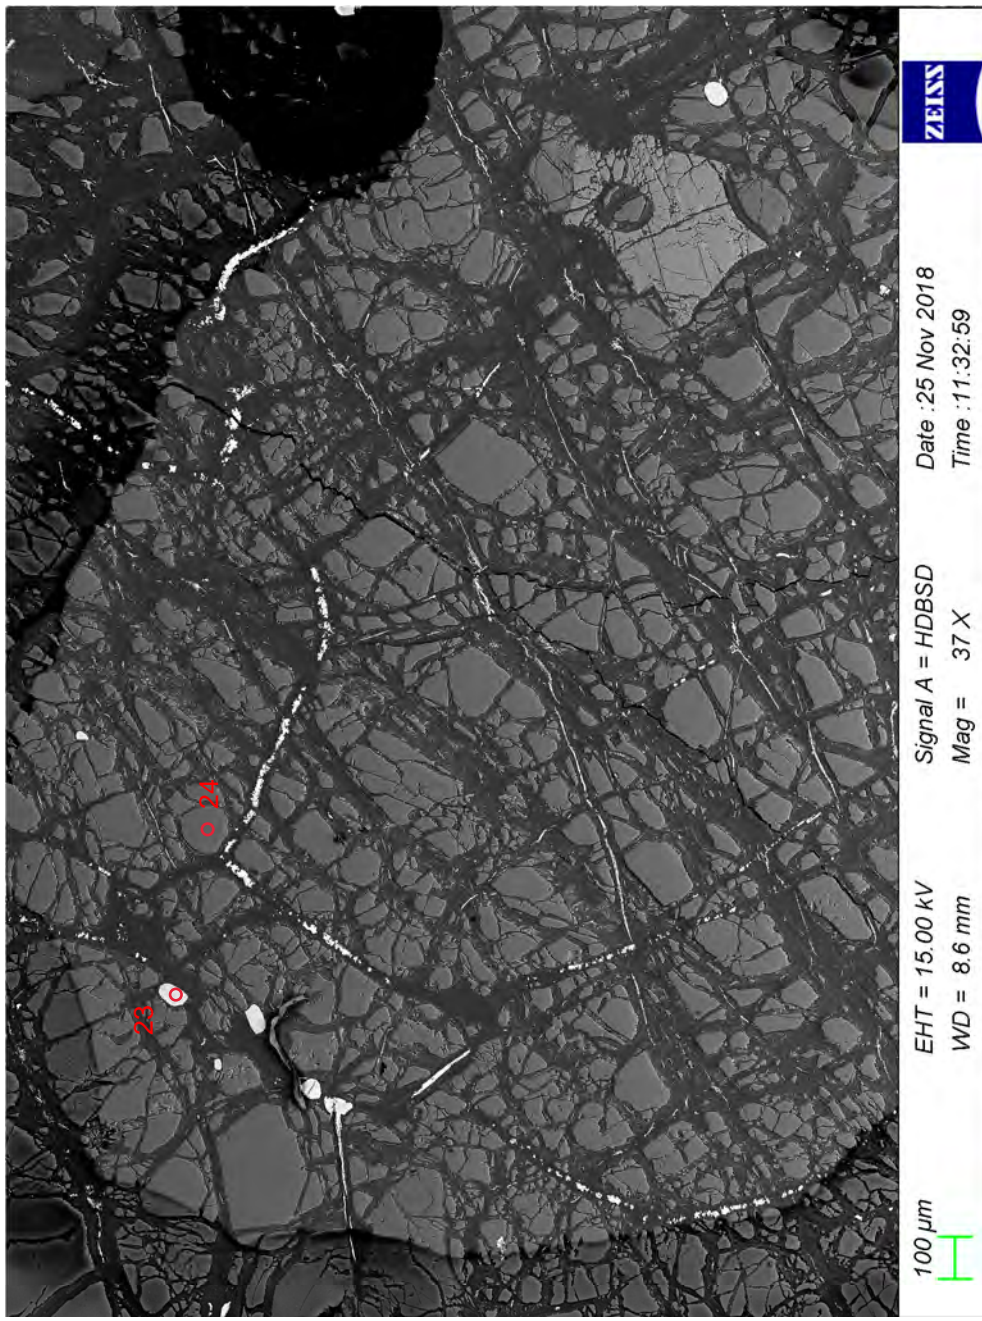



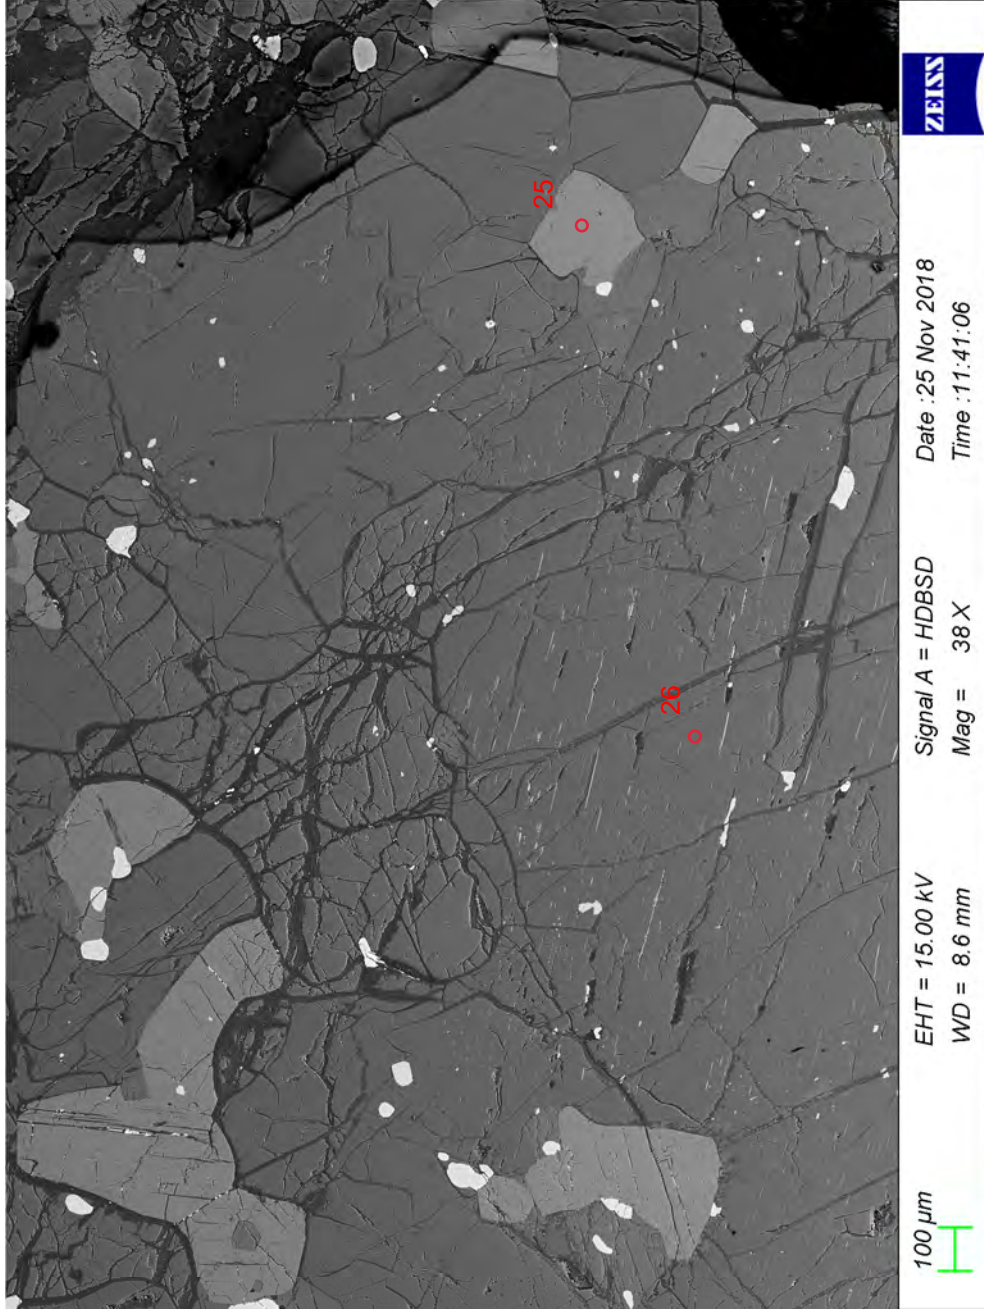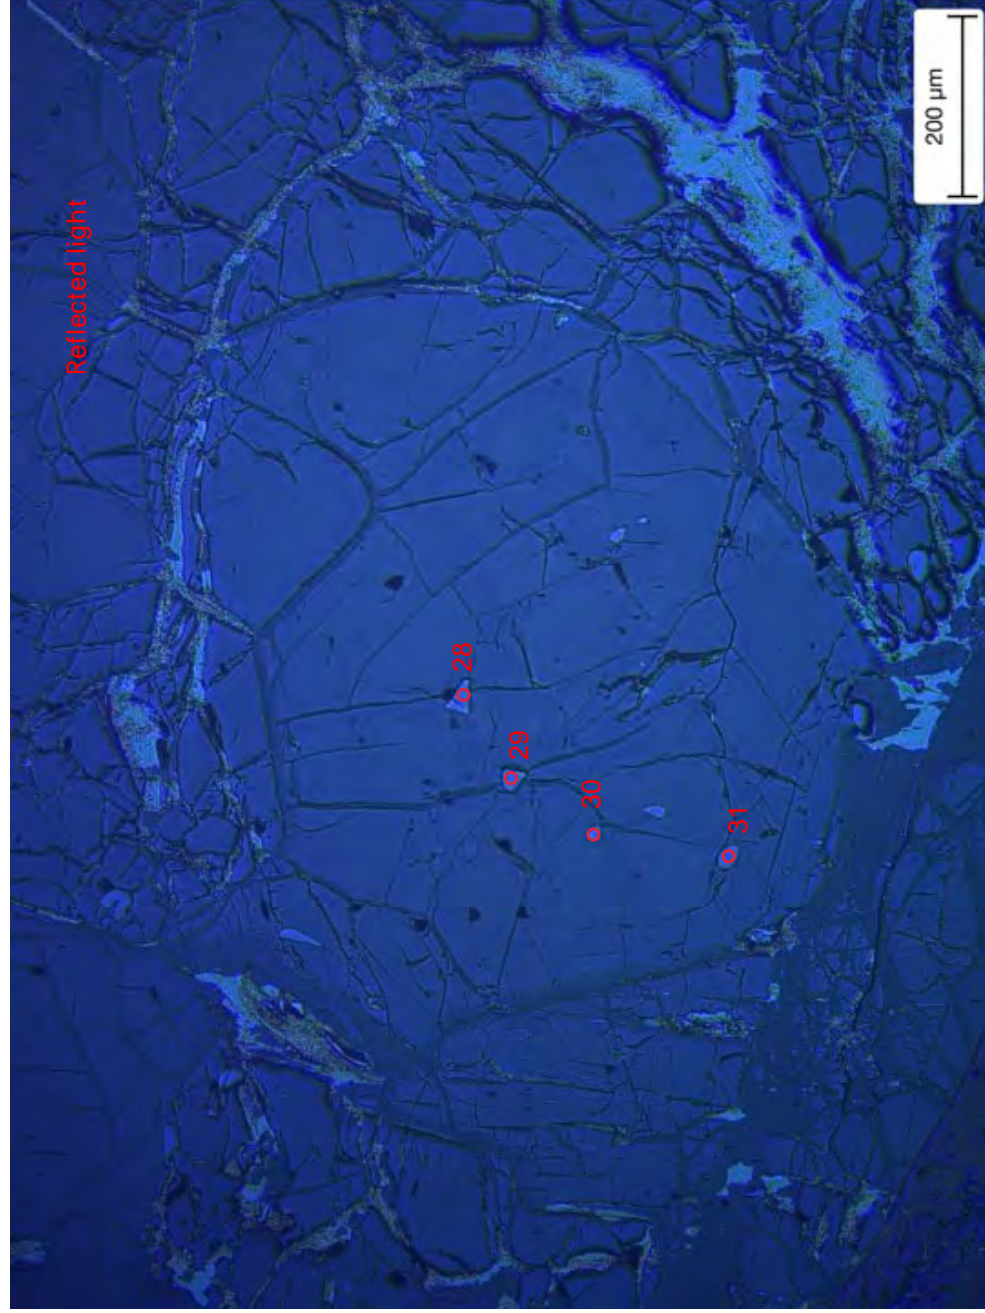

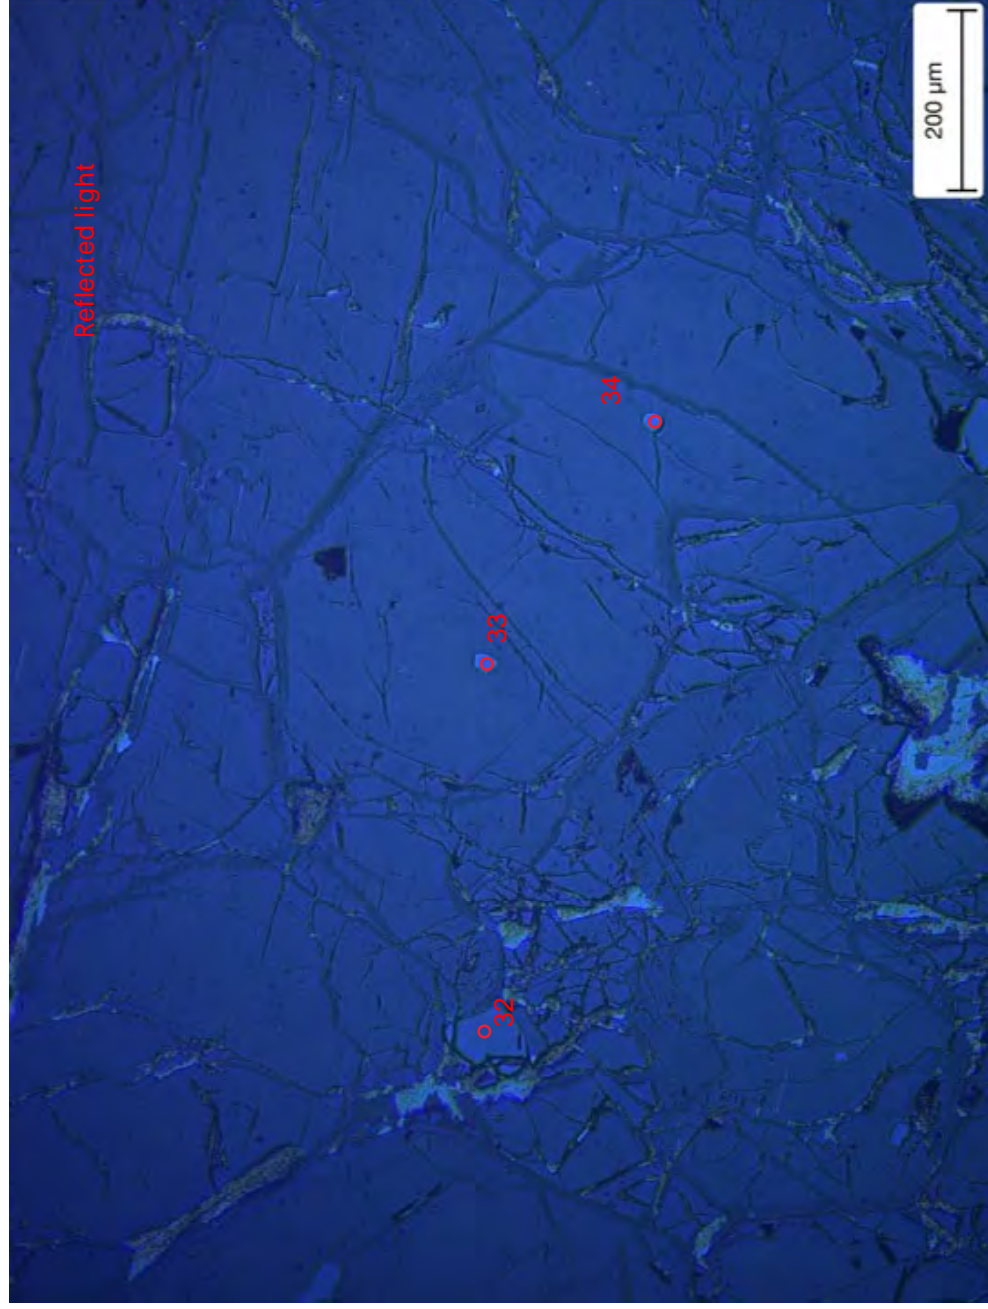



Sample C17-18

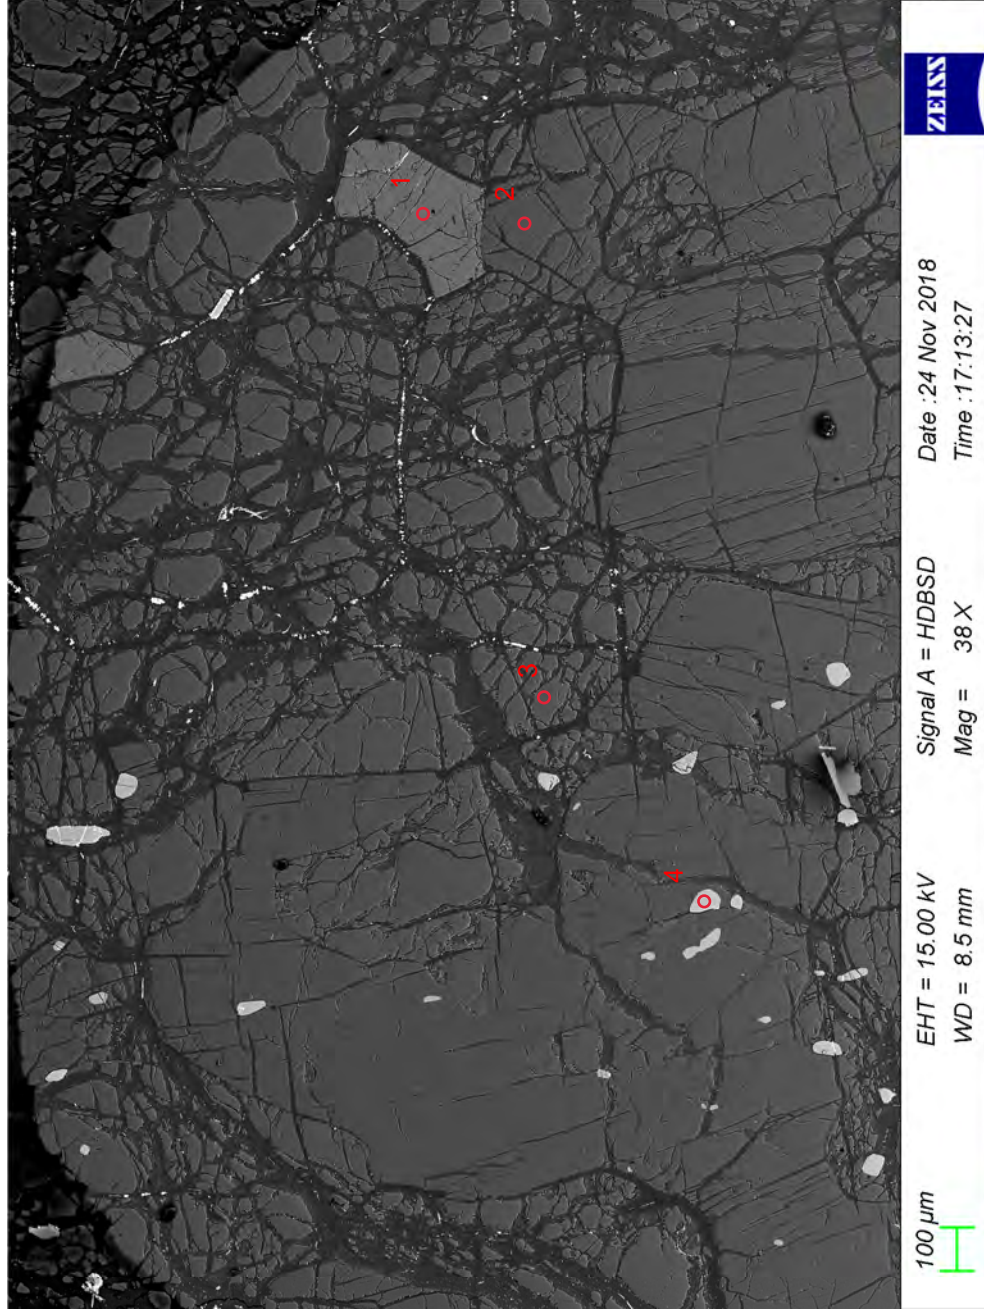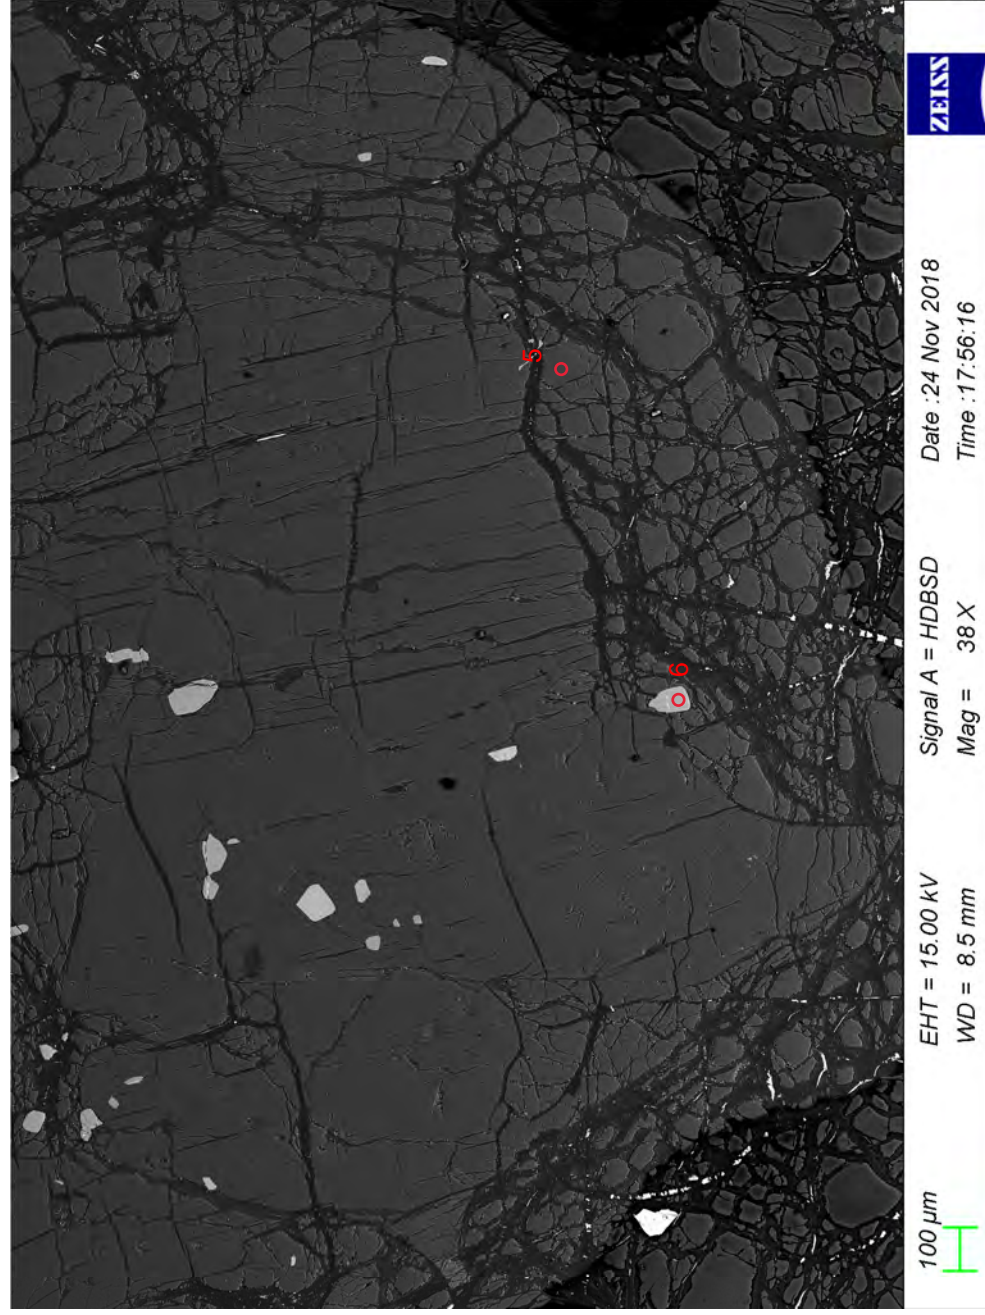



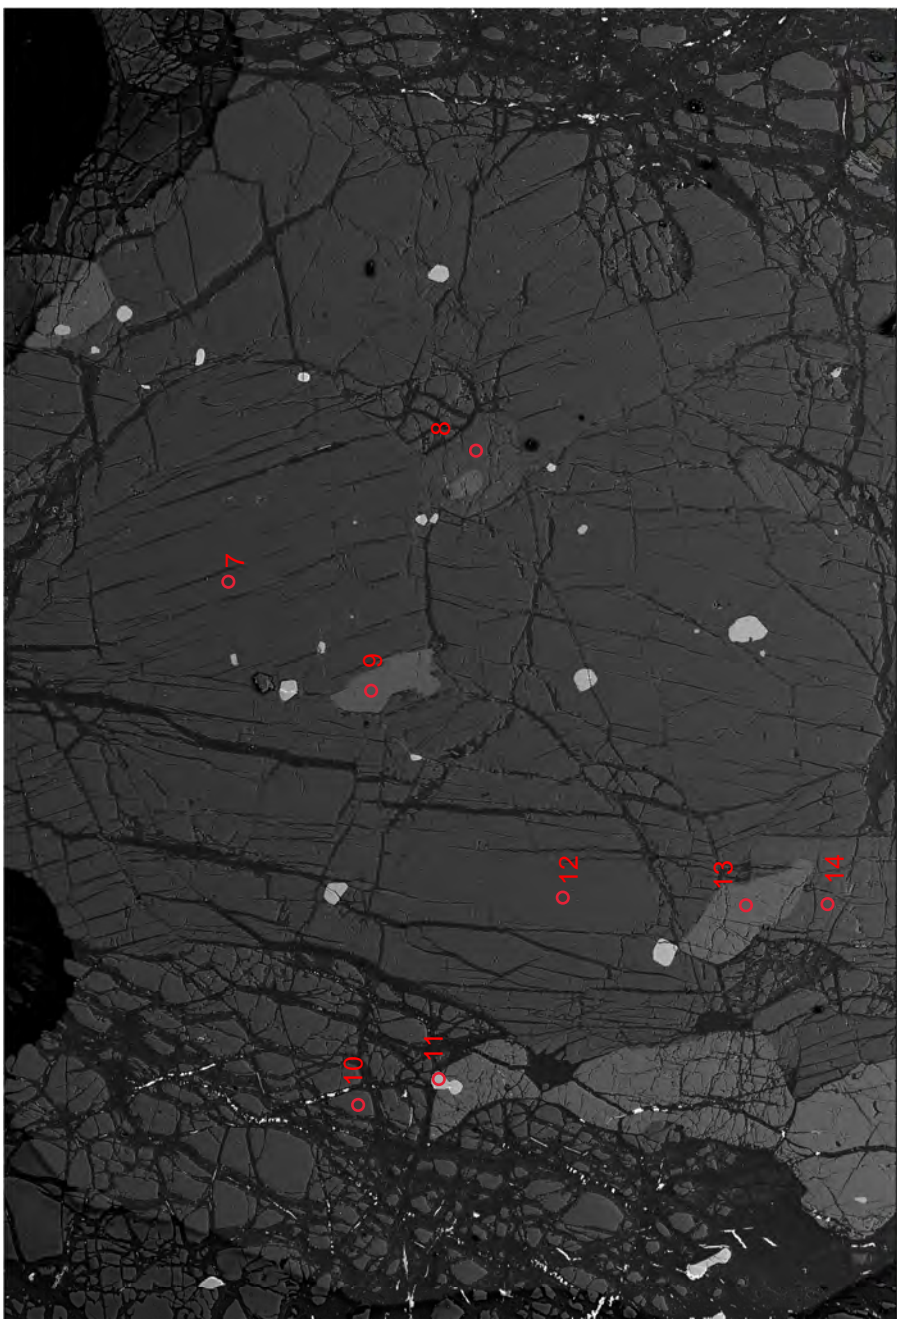

100 μm

EHT = 15.00 kV  
WD = 8.5 mm

Signal A = HDBSD  
Mag = 38 X

Date :24 Nov 2018  
Time :18:02:13

ZEISS

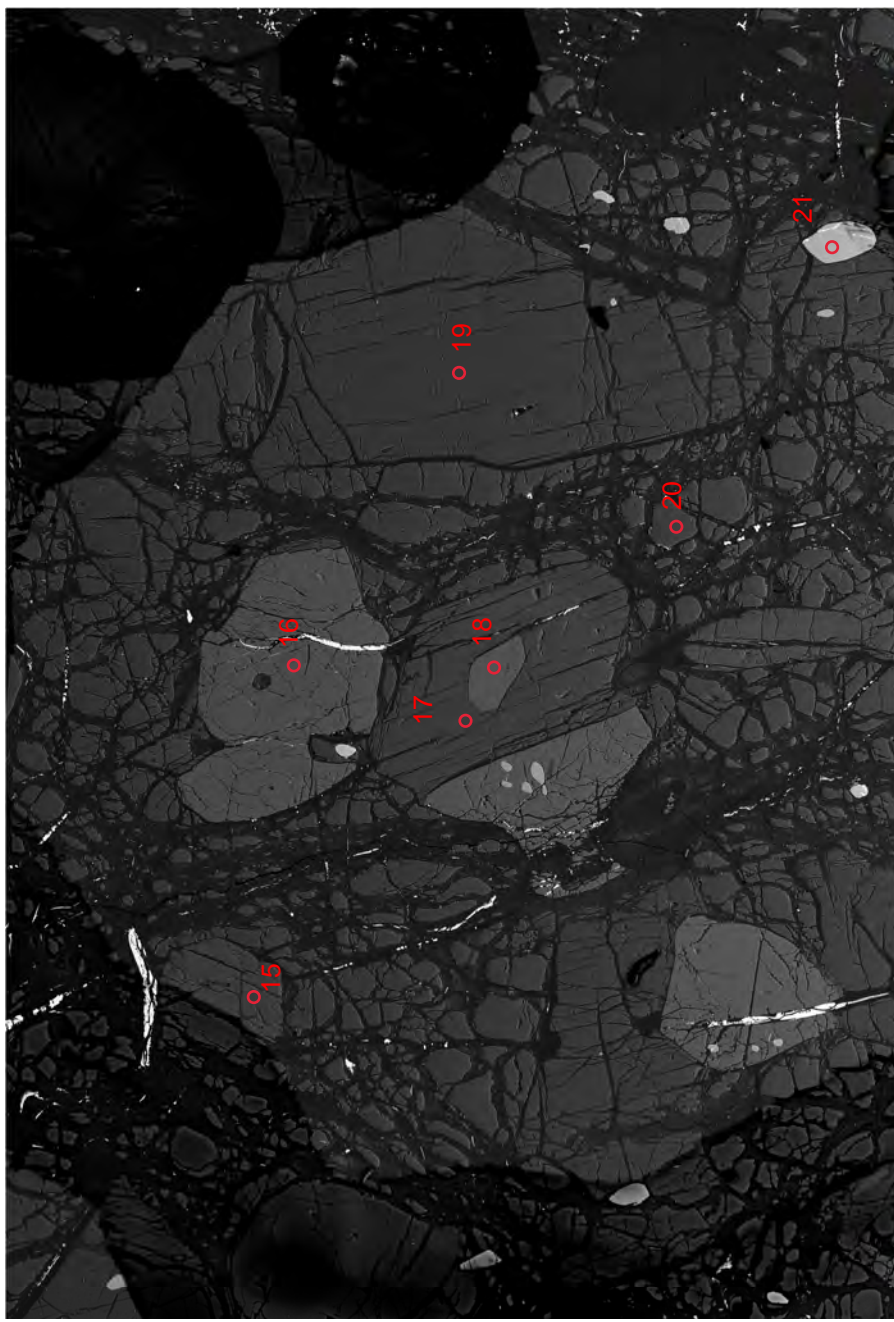

100 μm

EHT = 15.00 kV  
WD = 8.5 mm

Signal A = HDBSD  
Mag = 38 X

Date :24 Nov 2018  
Time :18:43:01

ZEISS



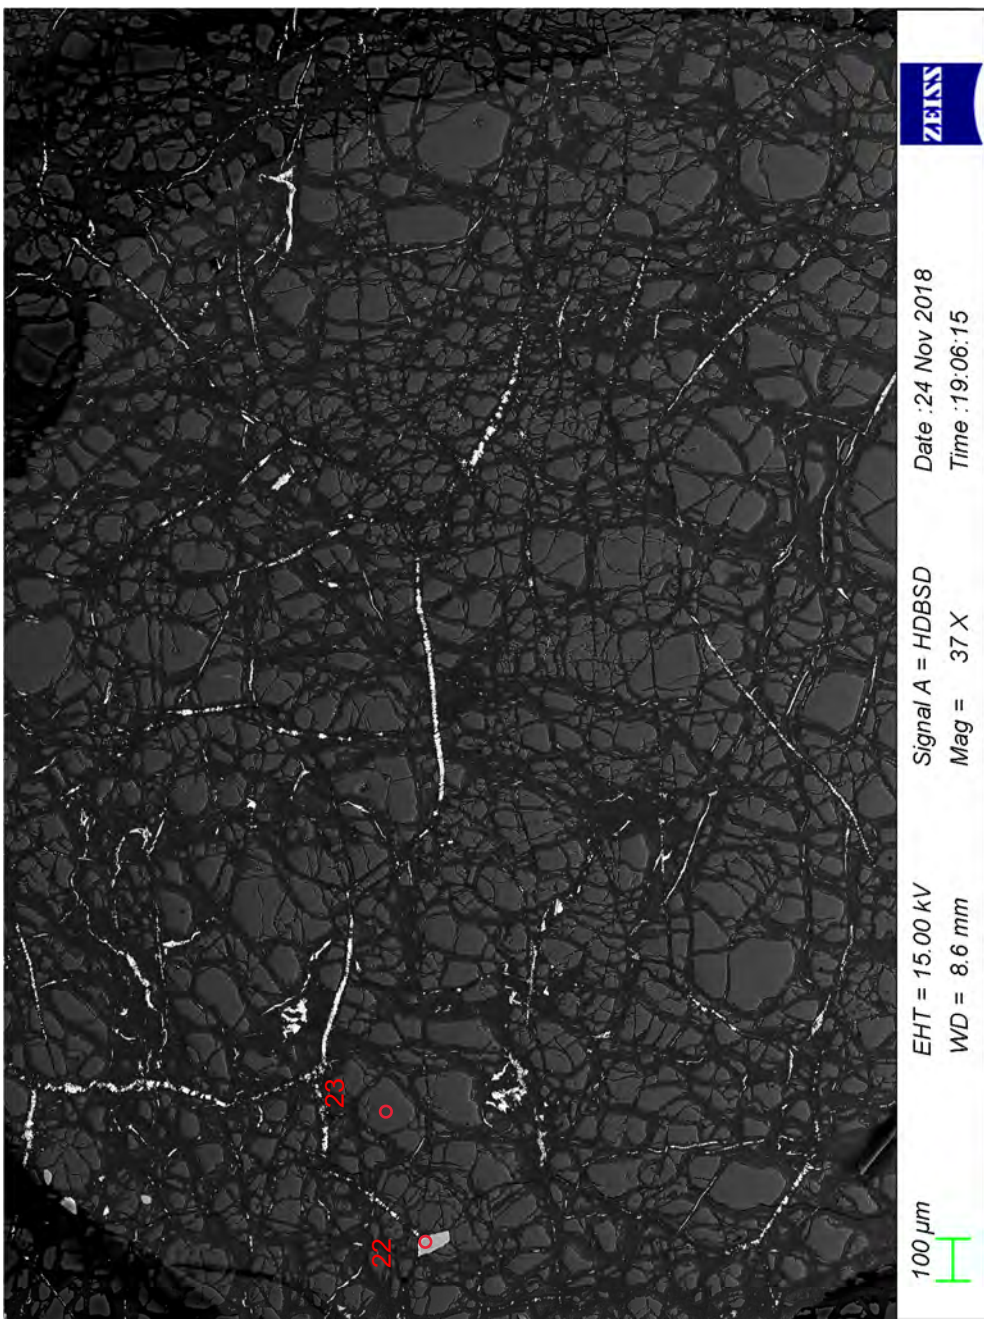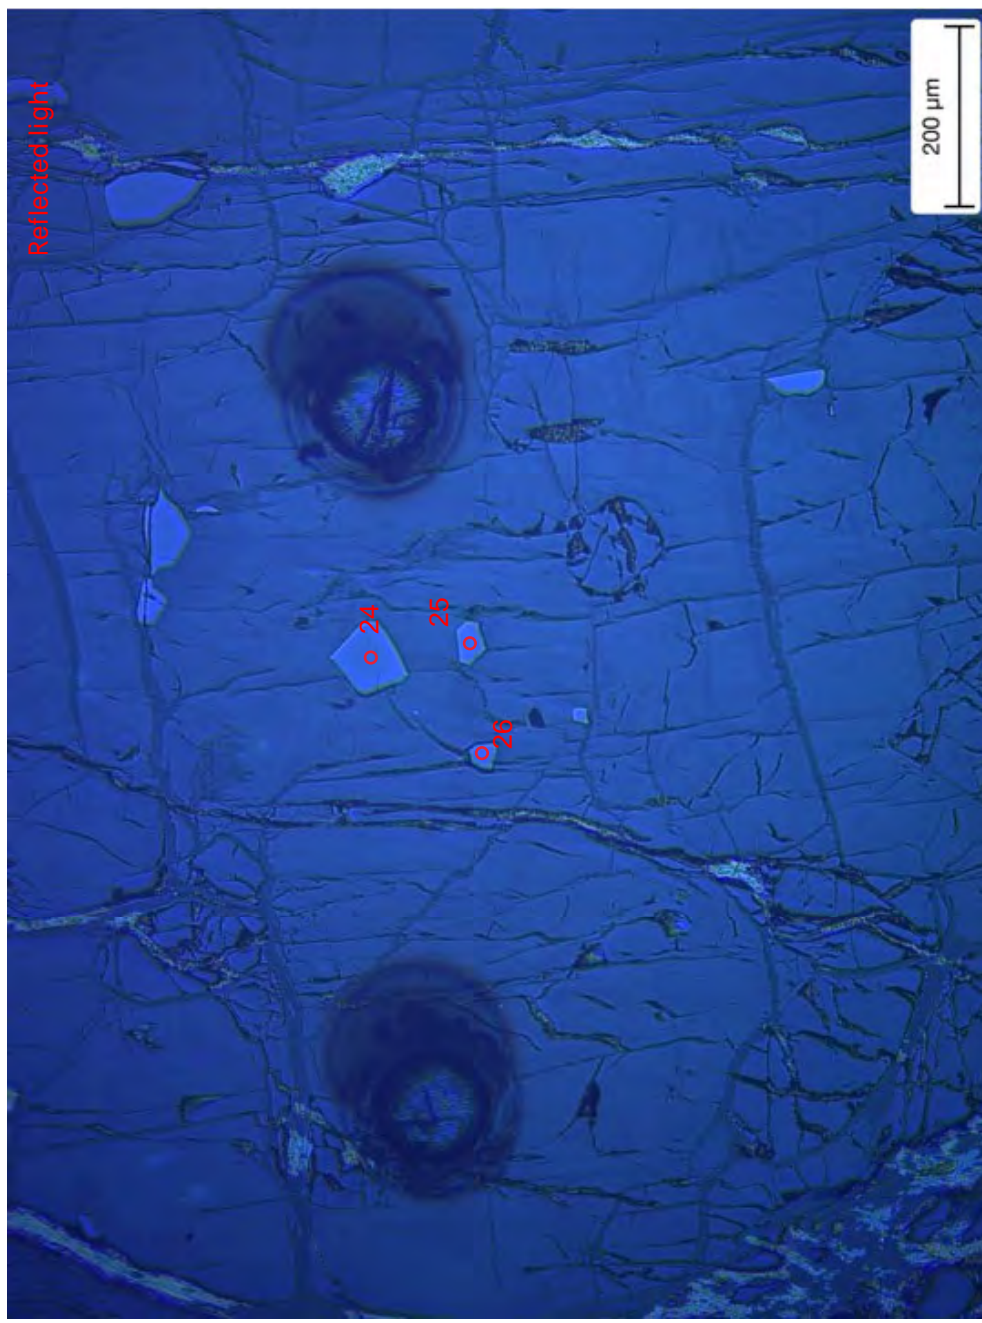

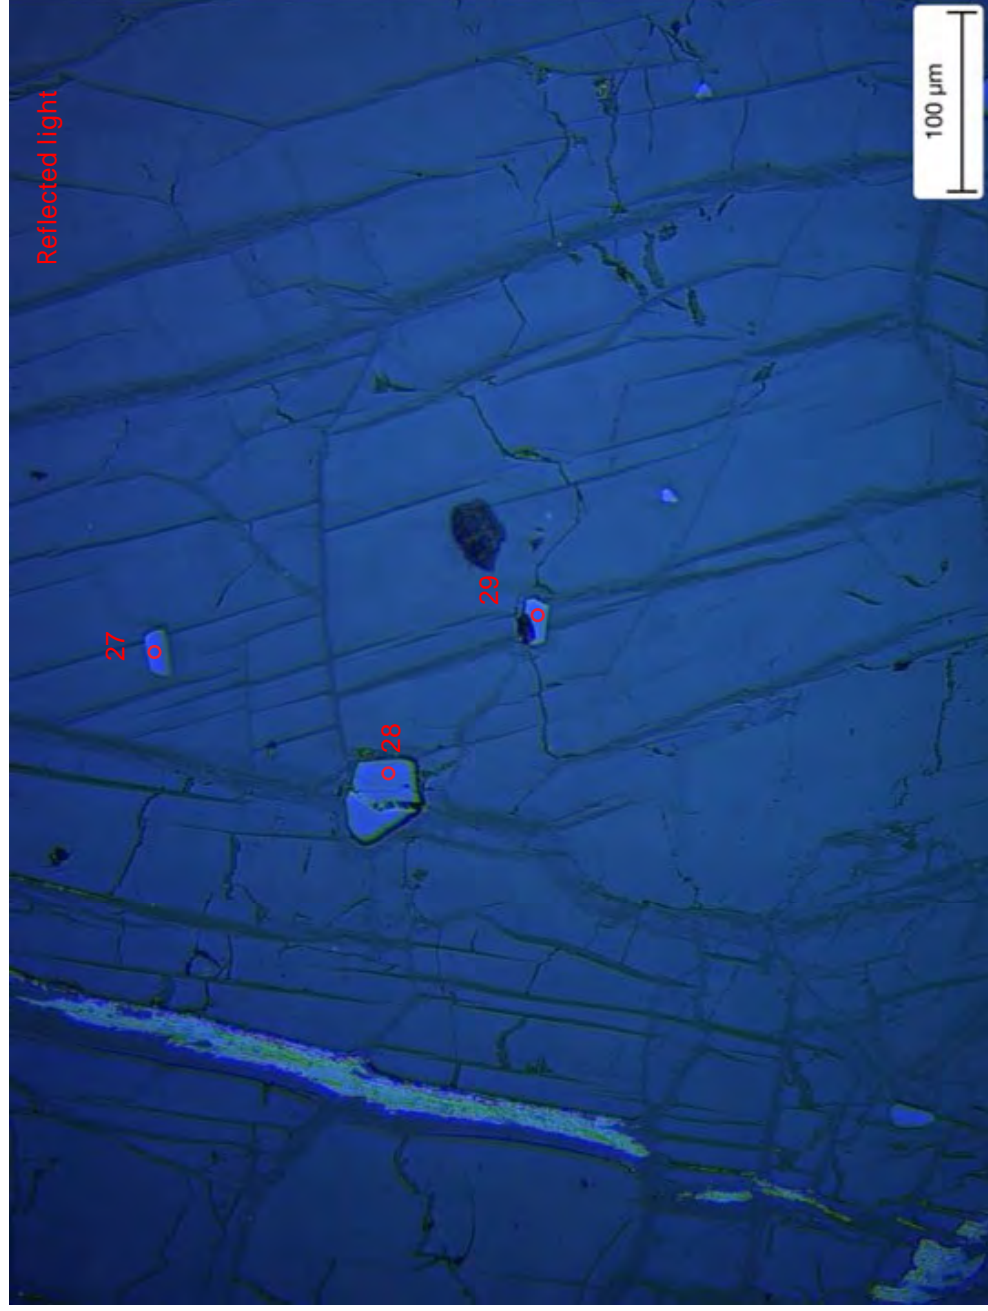

○



Sample C17-19

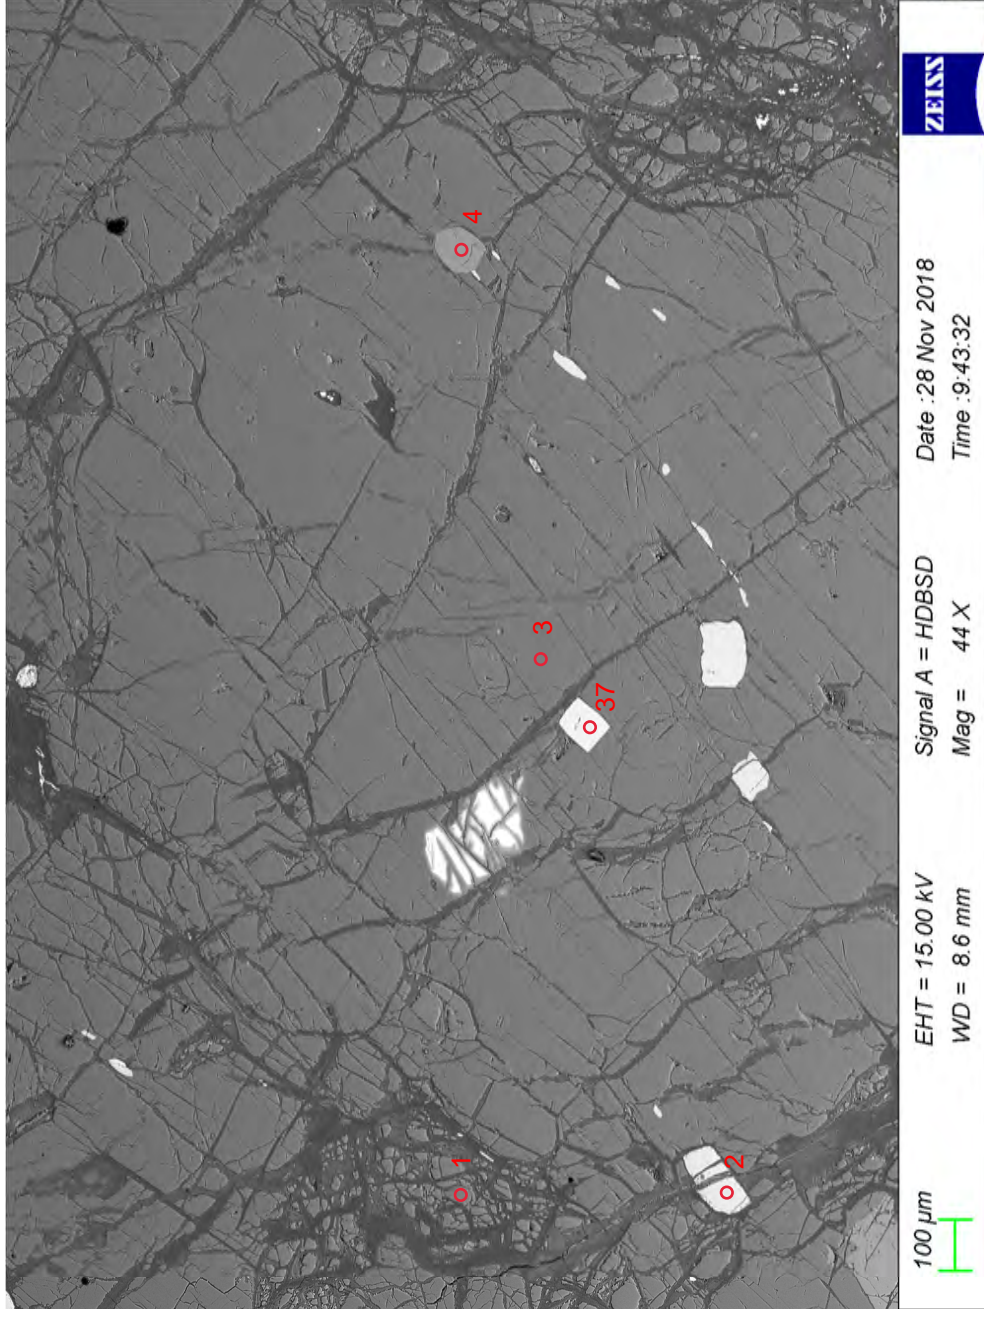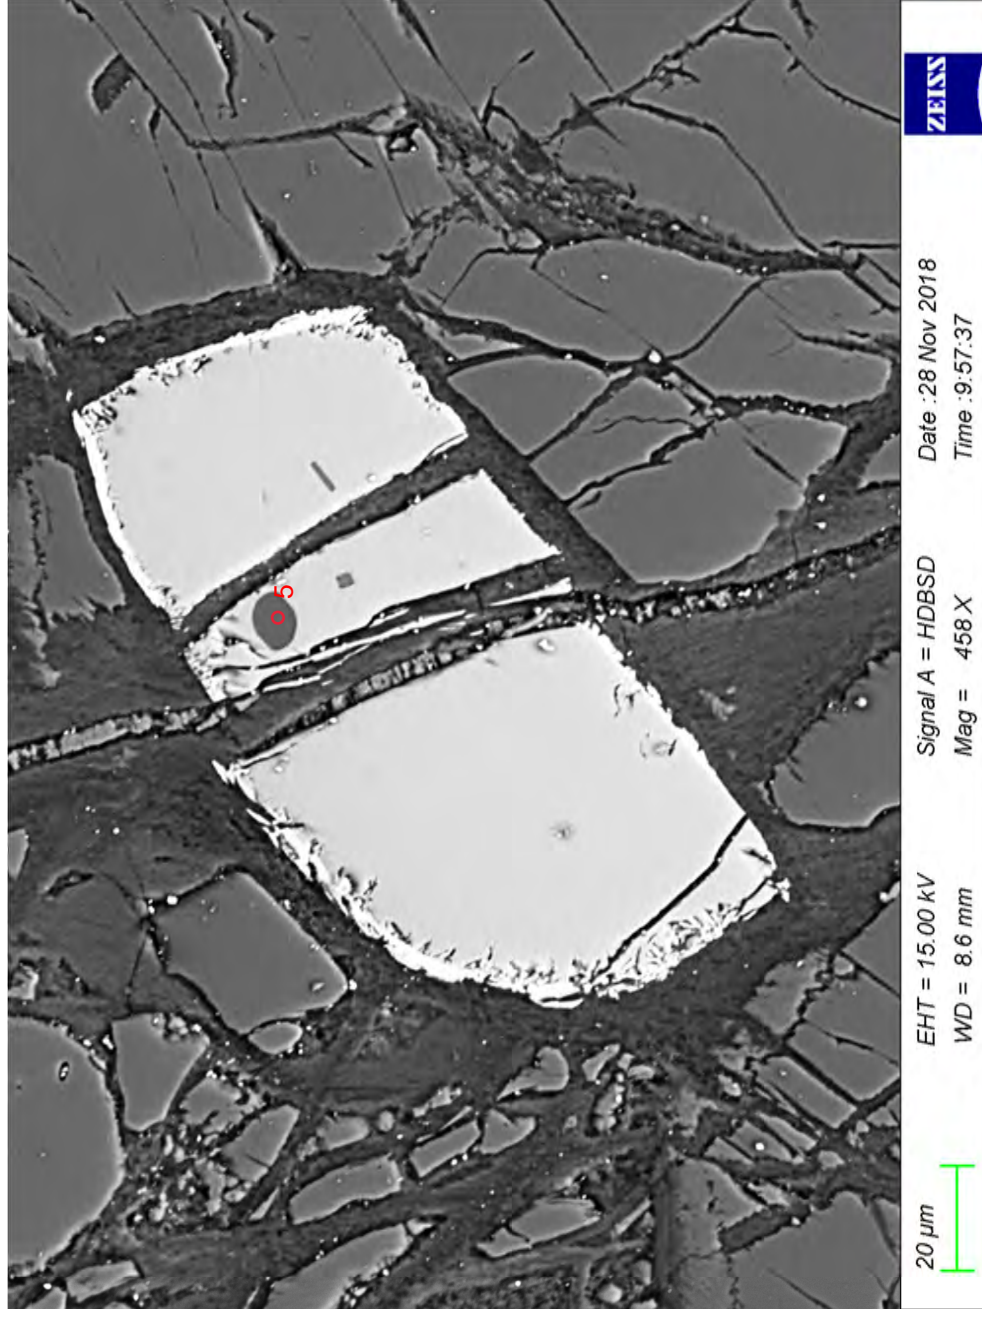



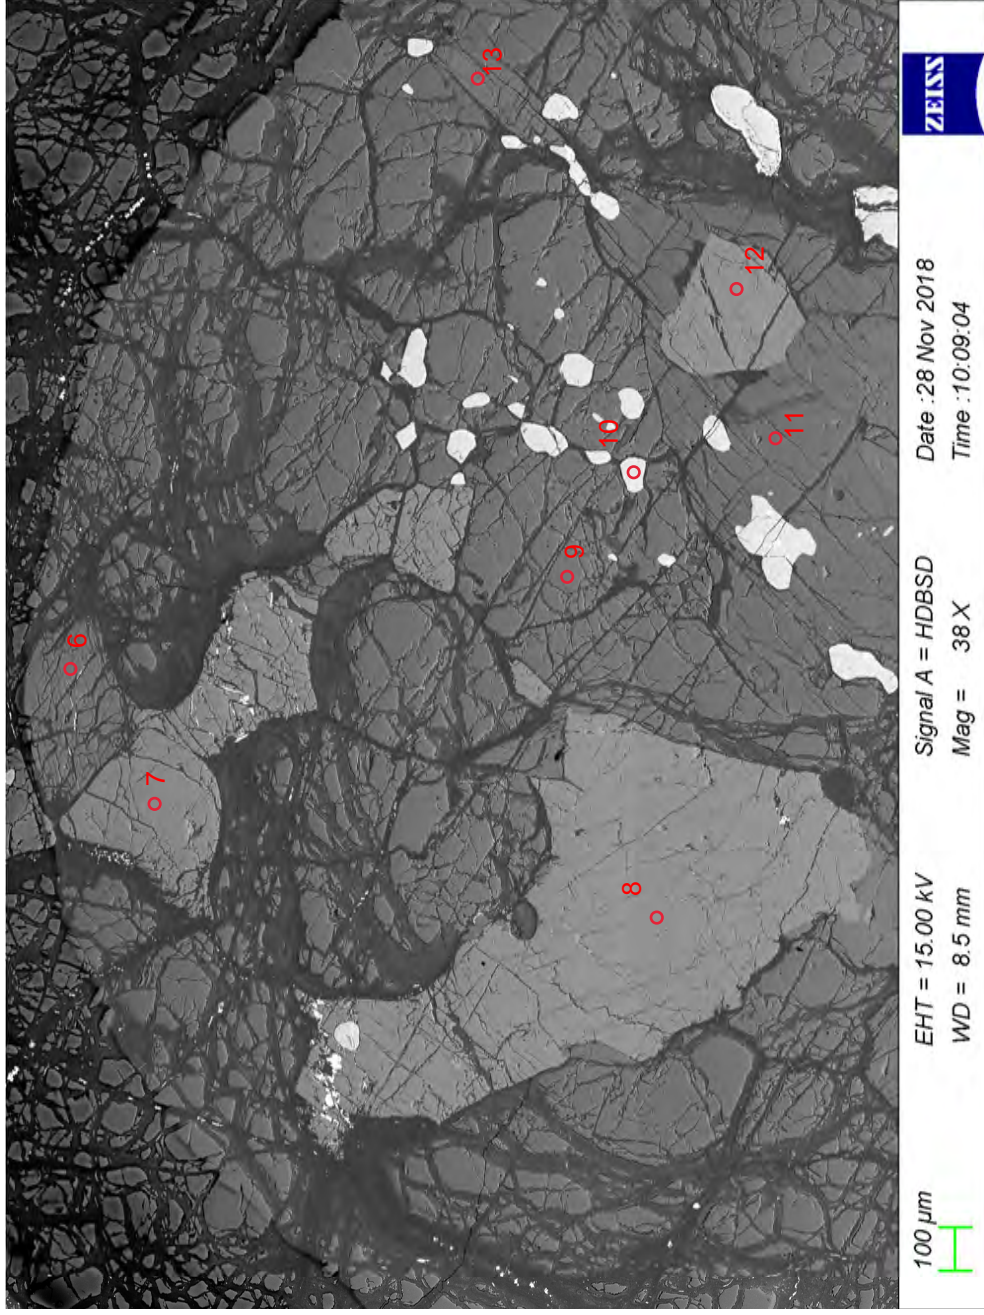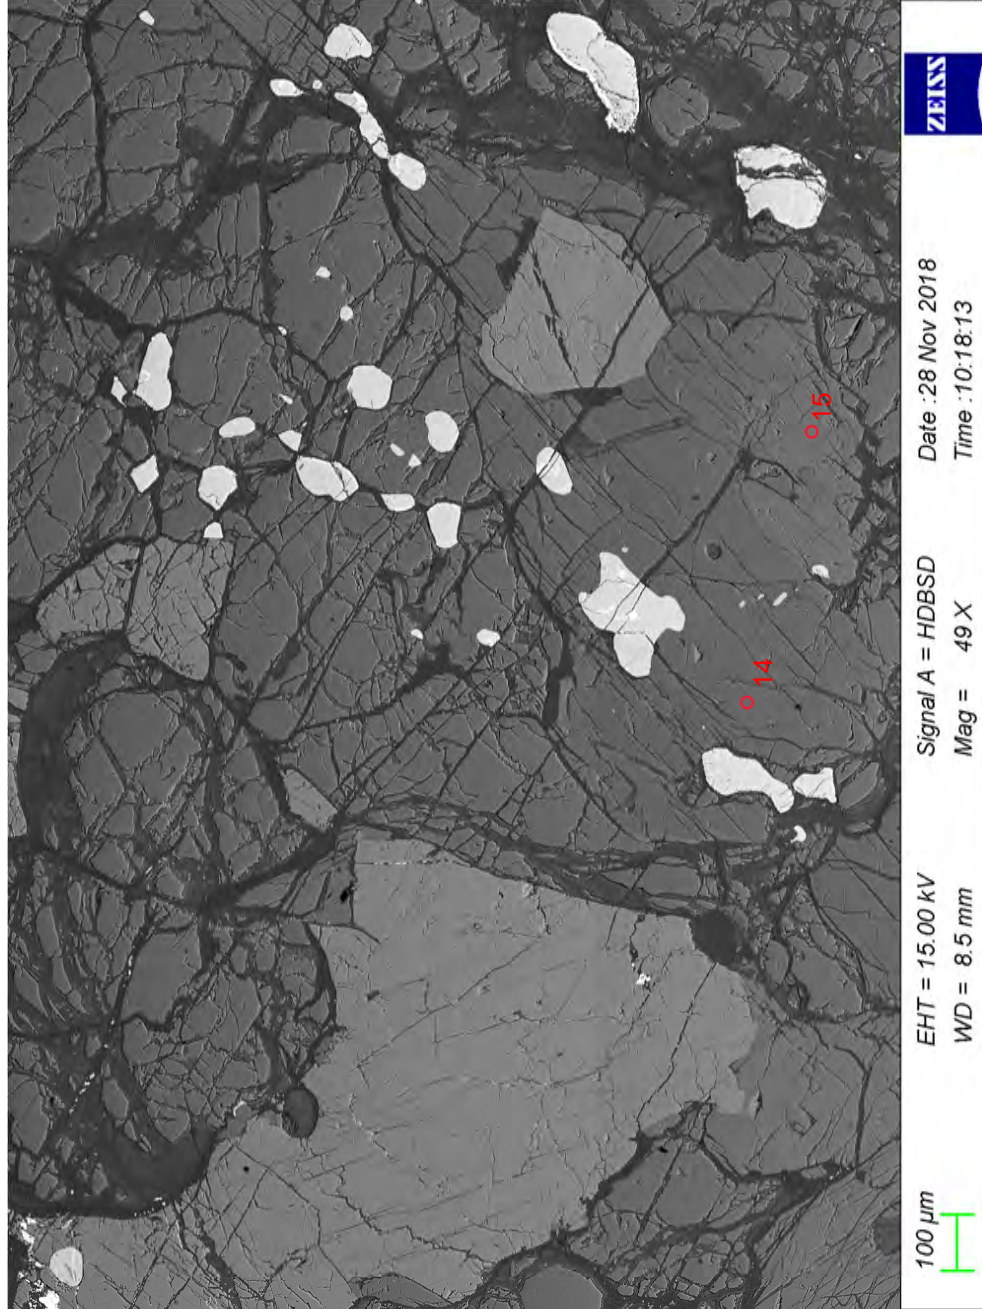



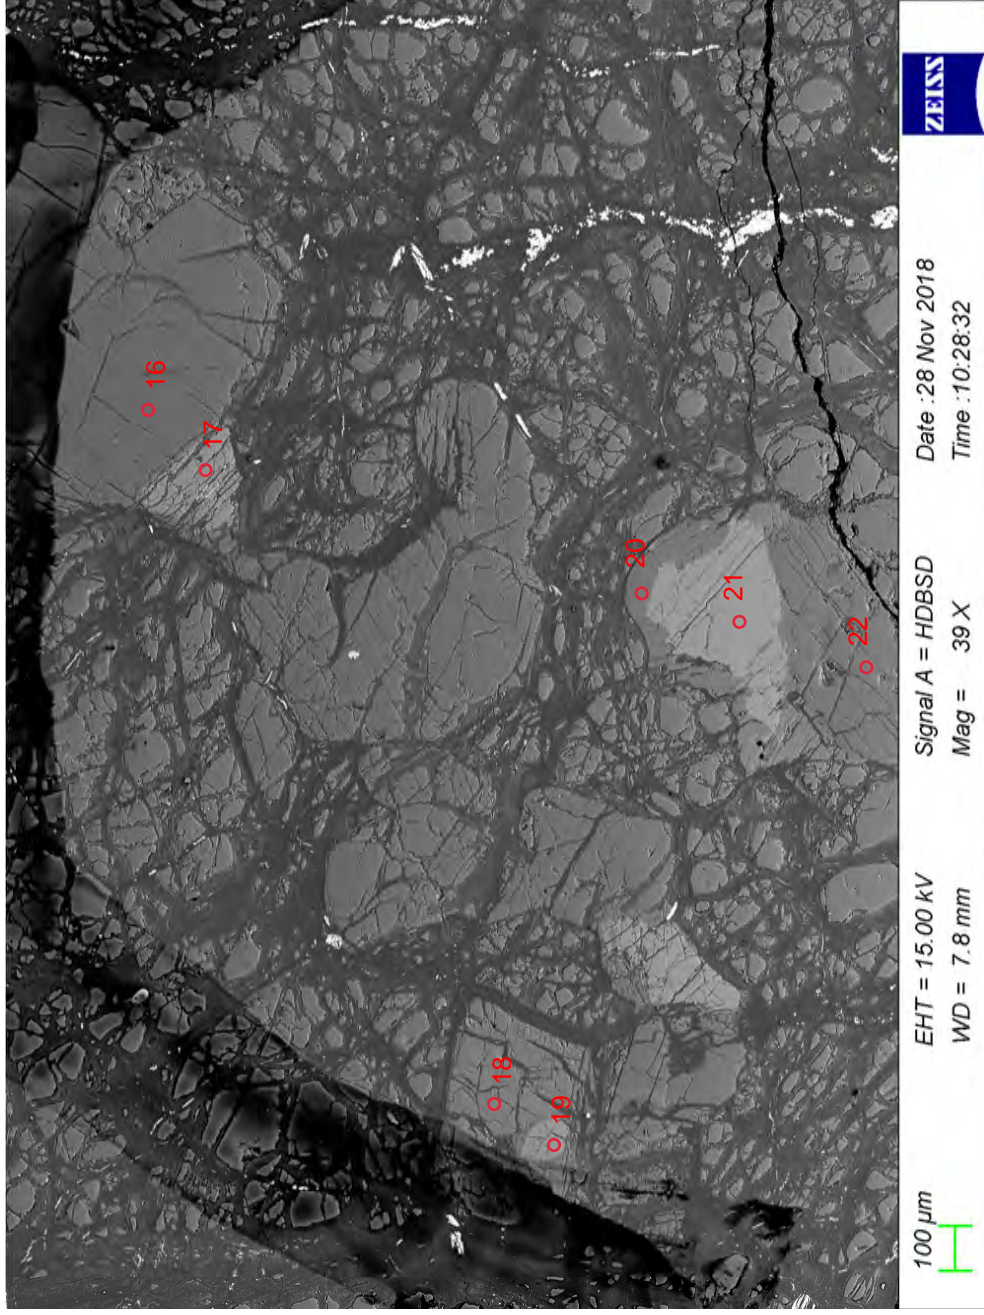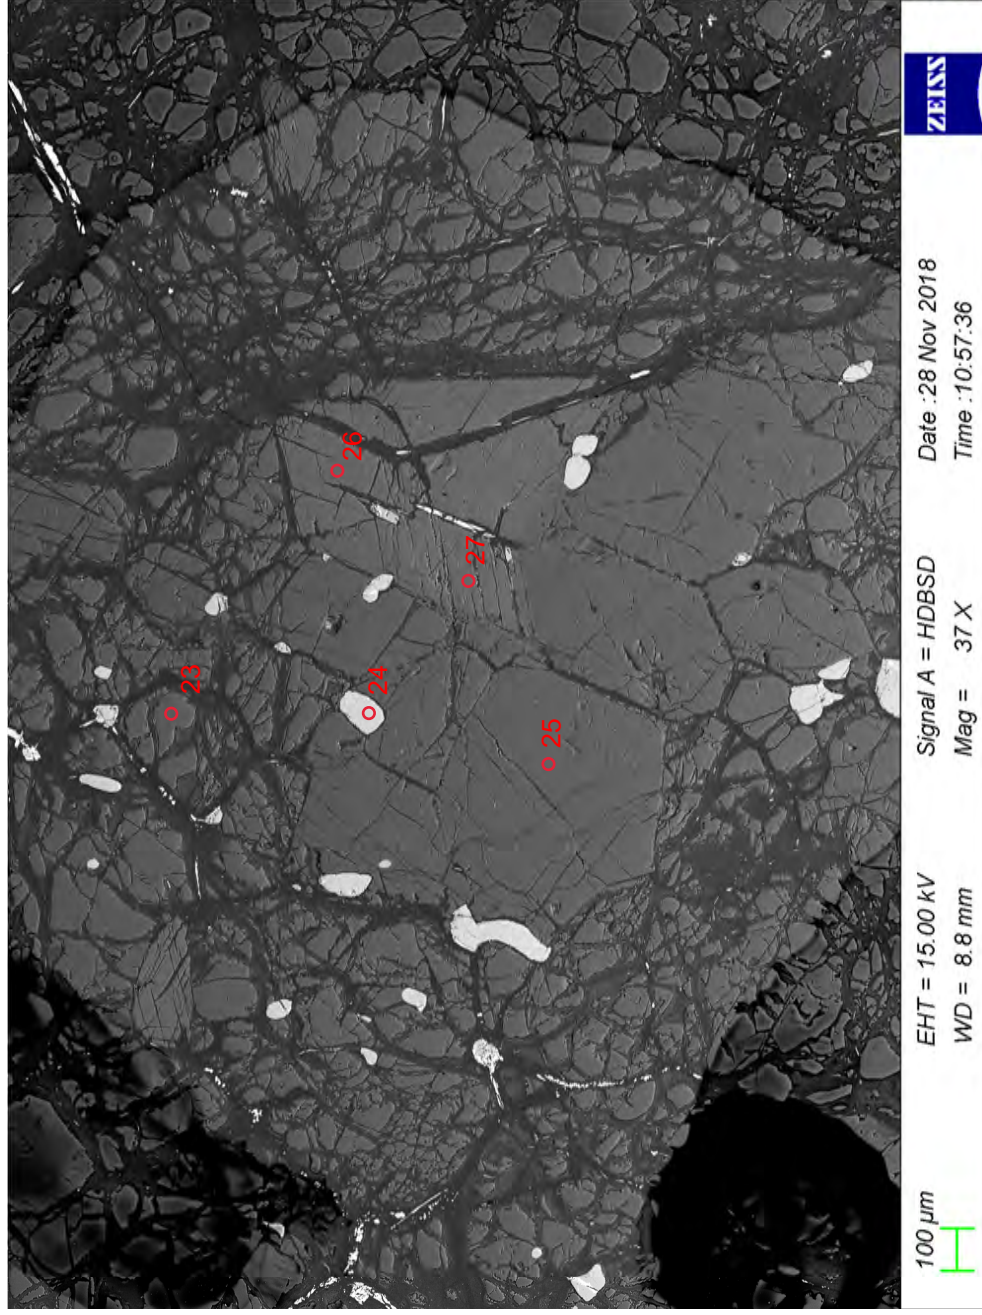

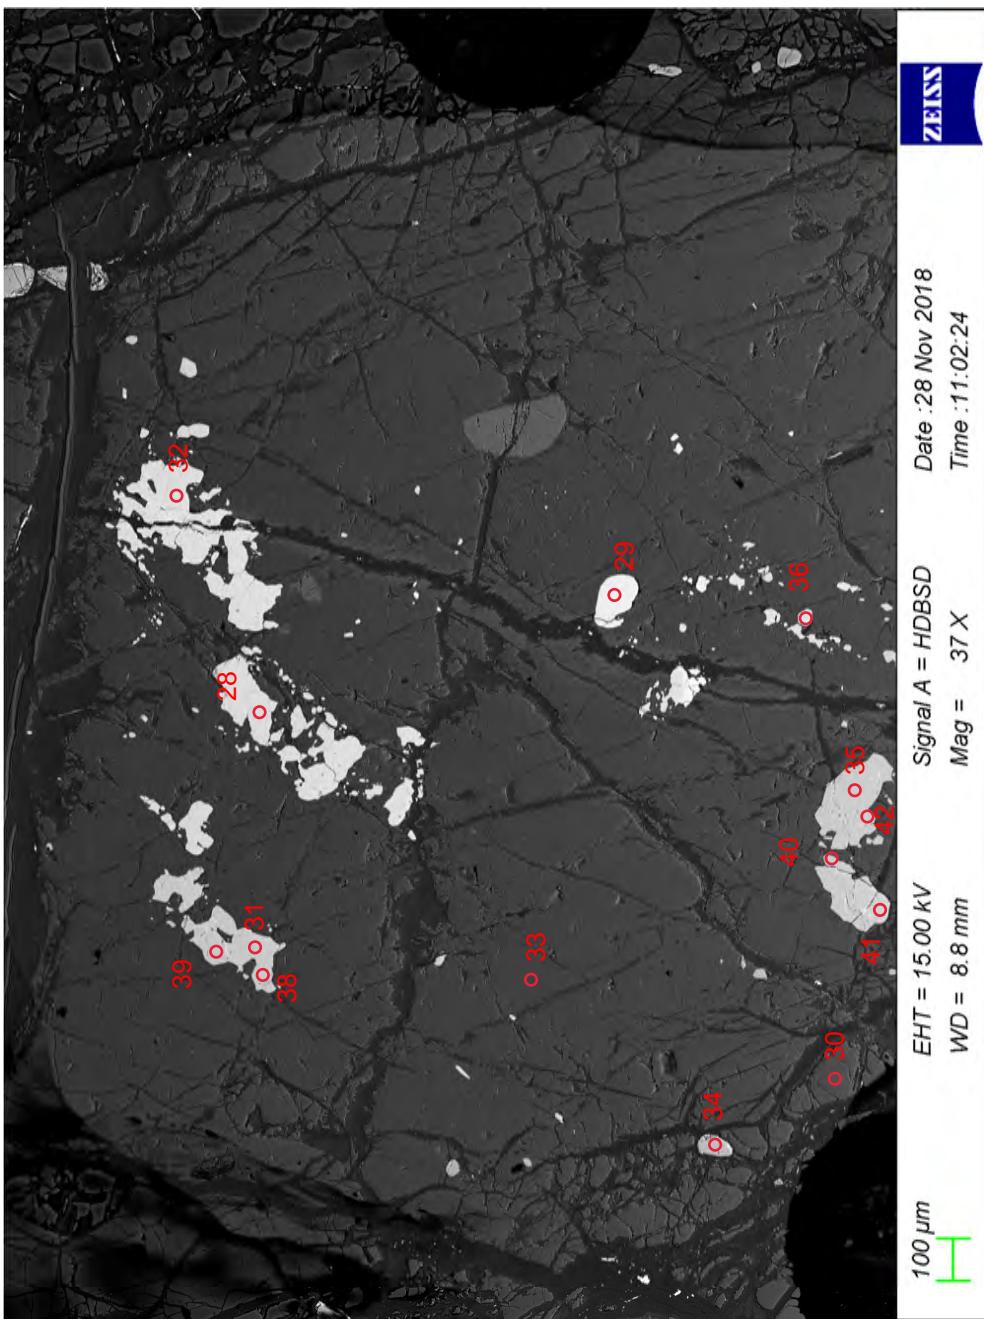



Sample C17-20

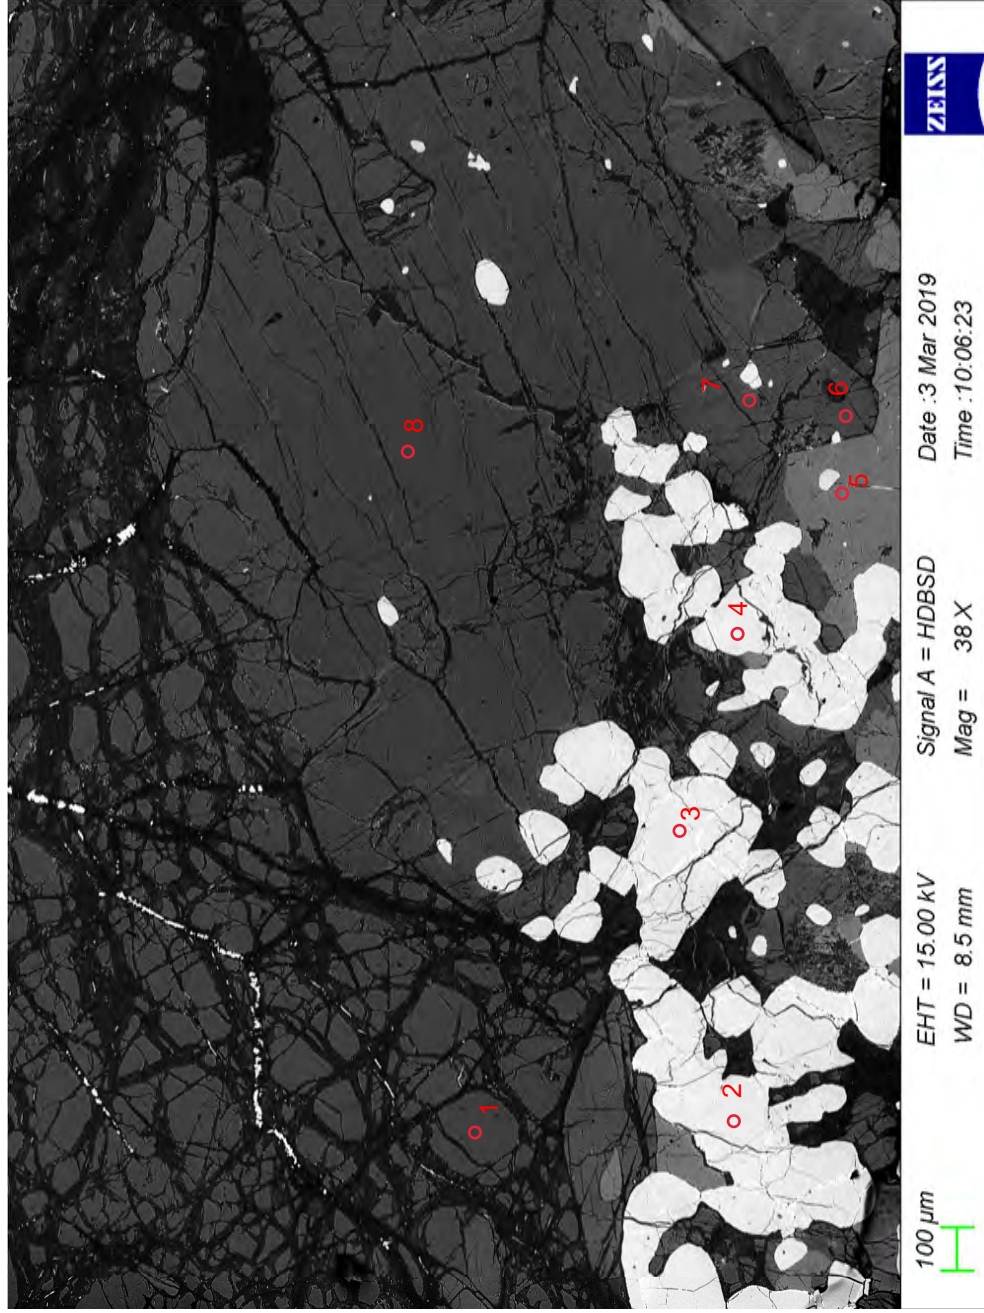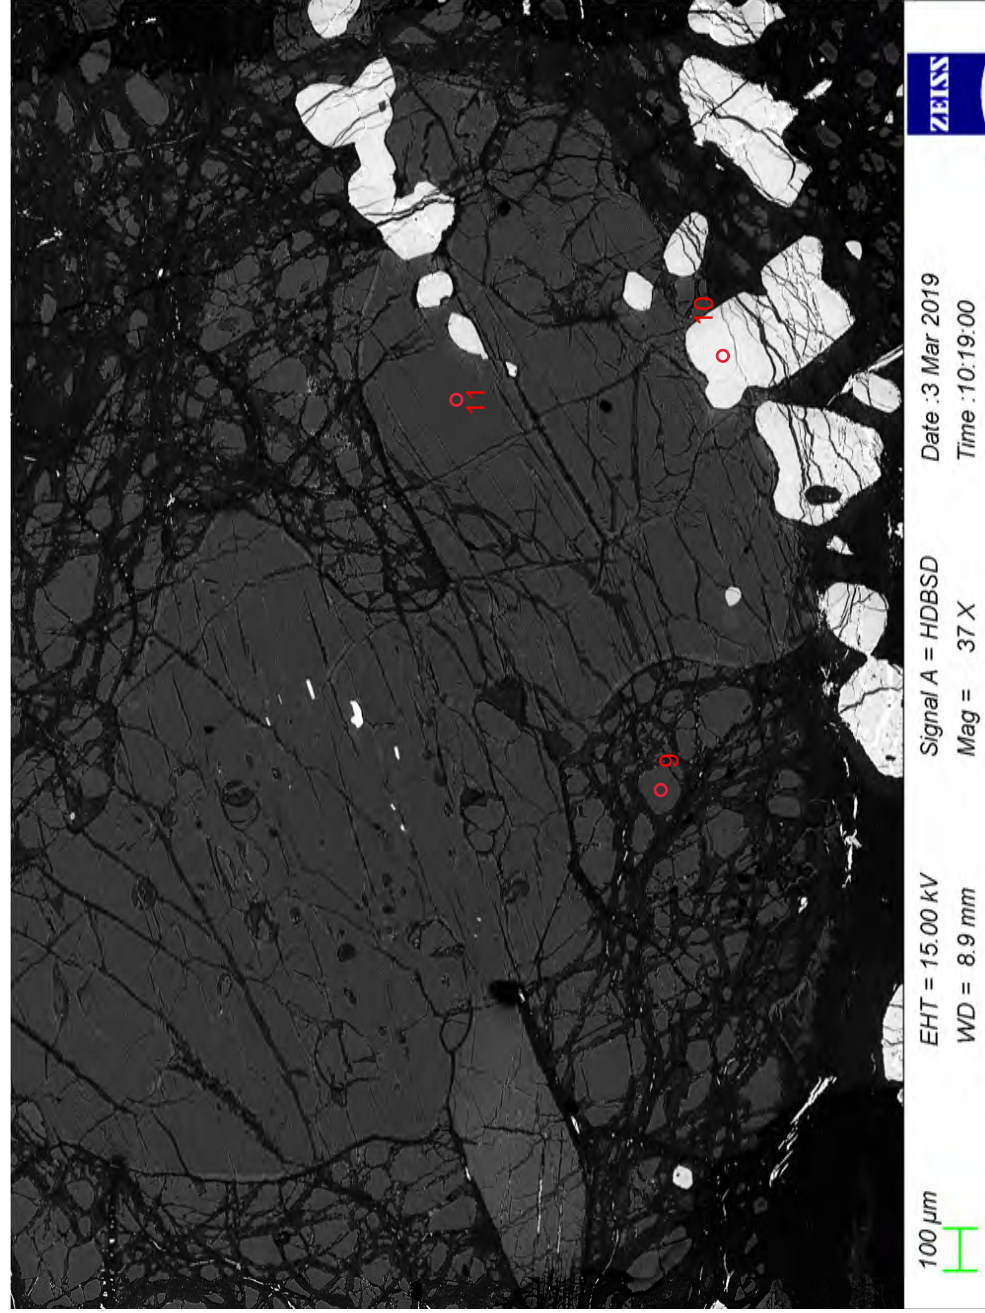



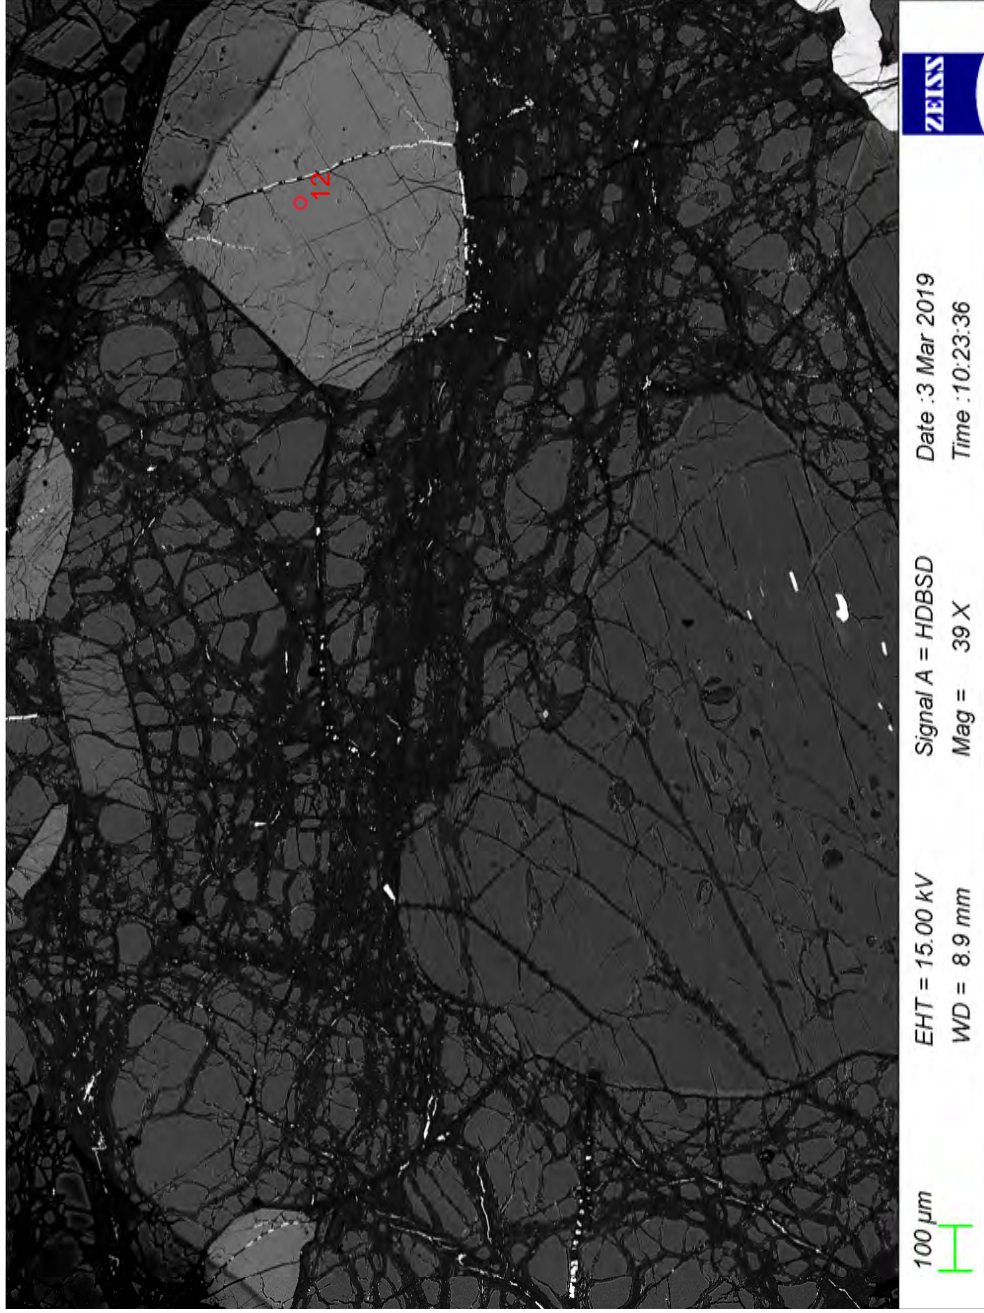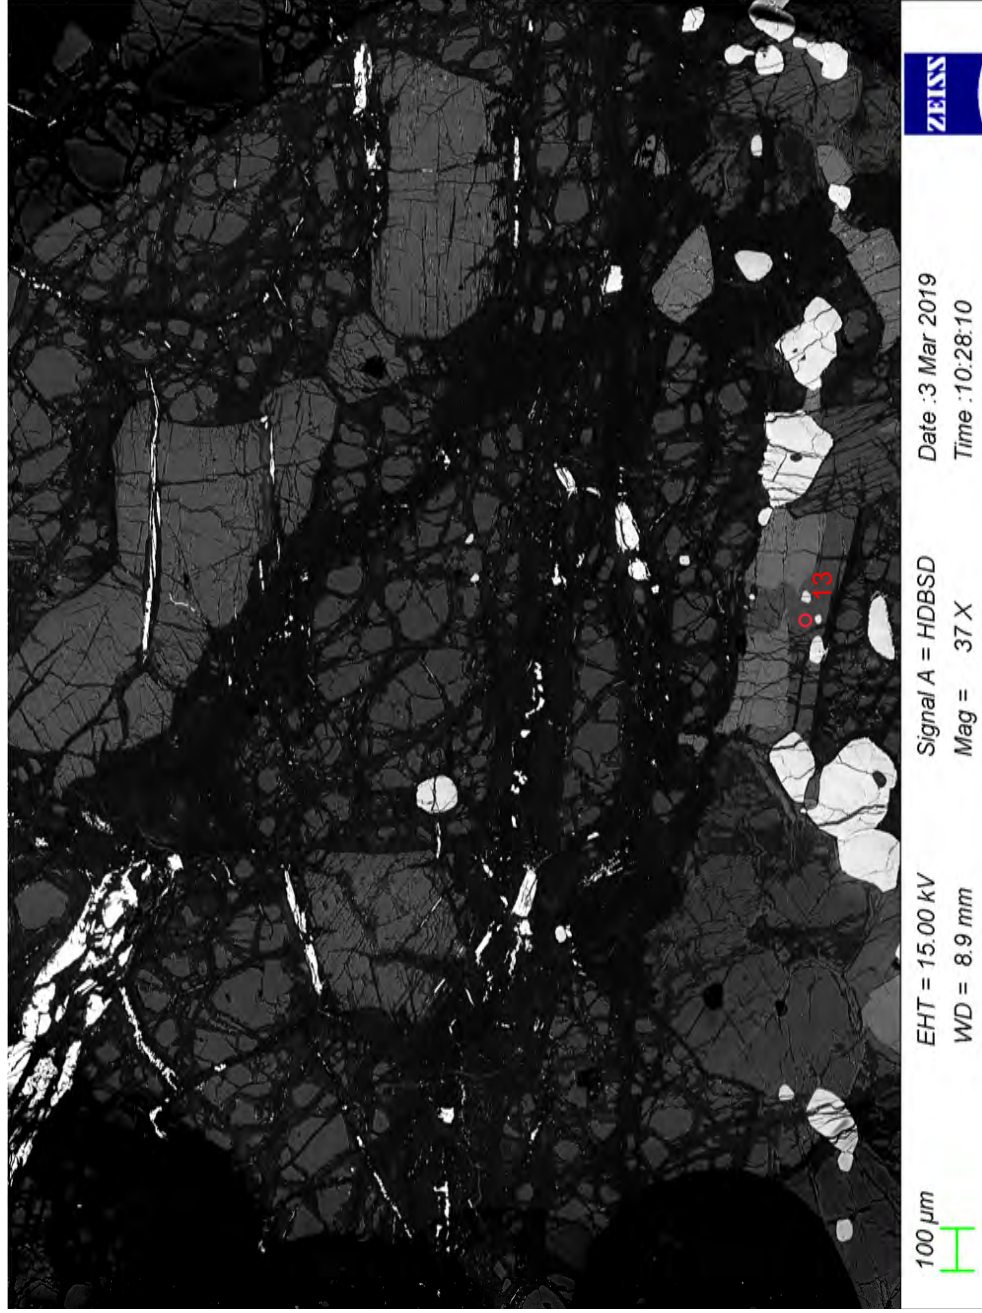



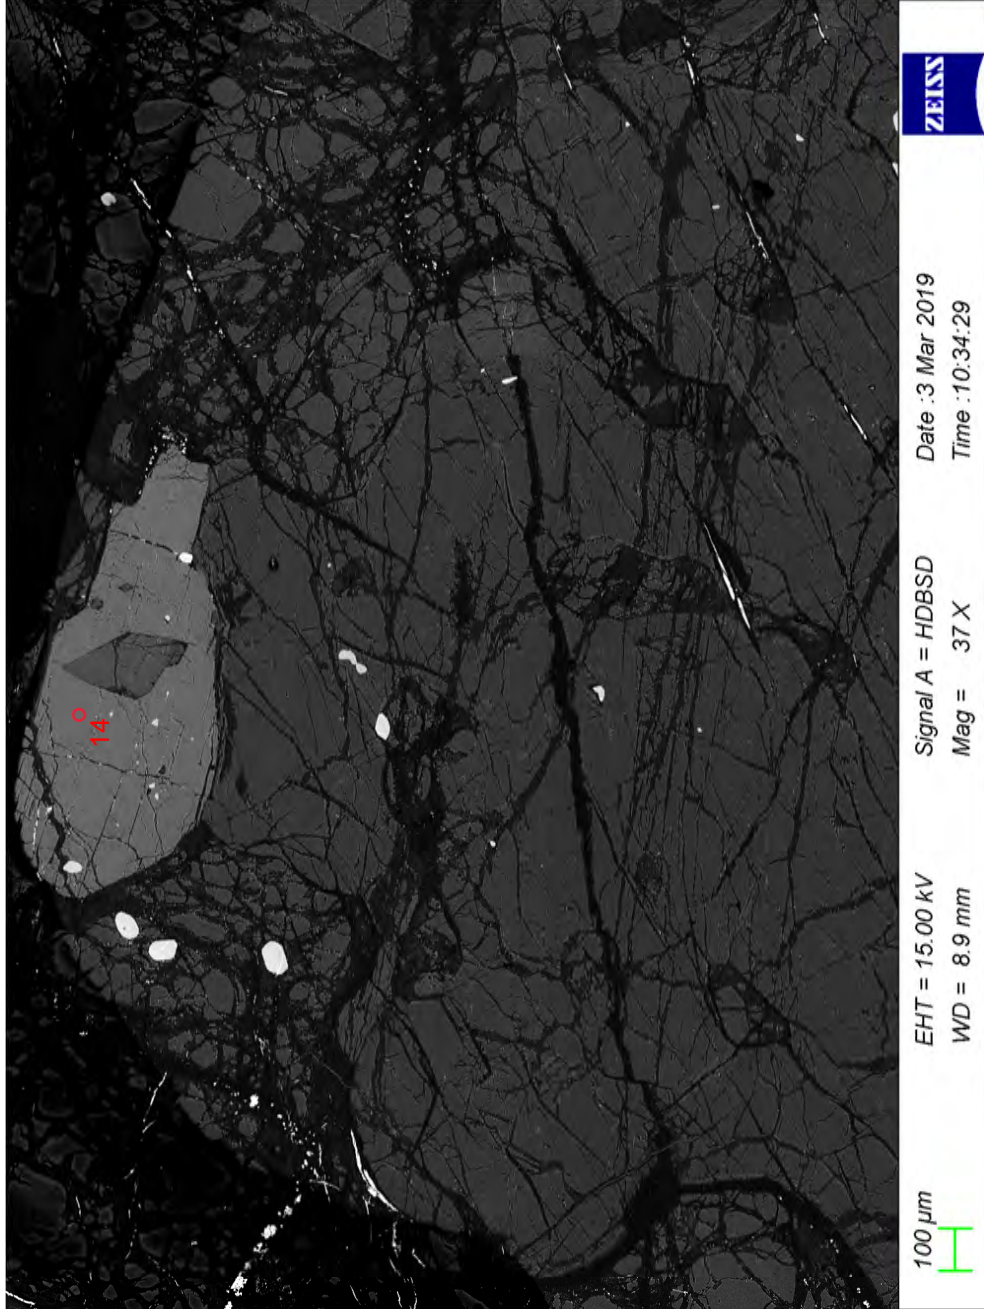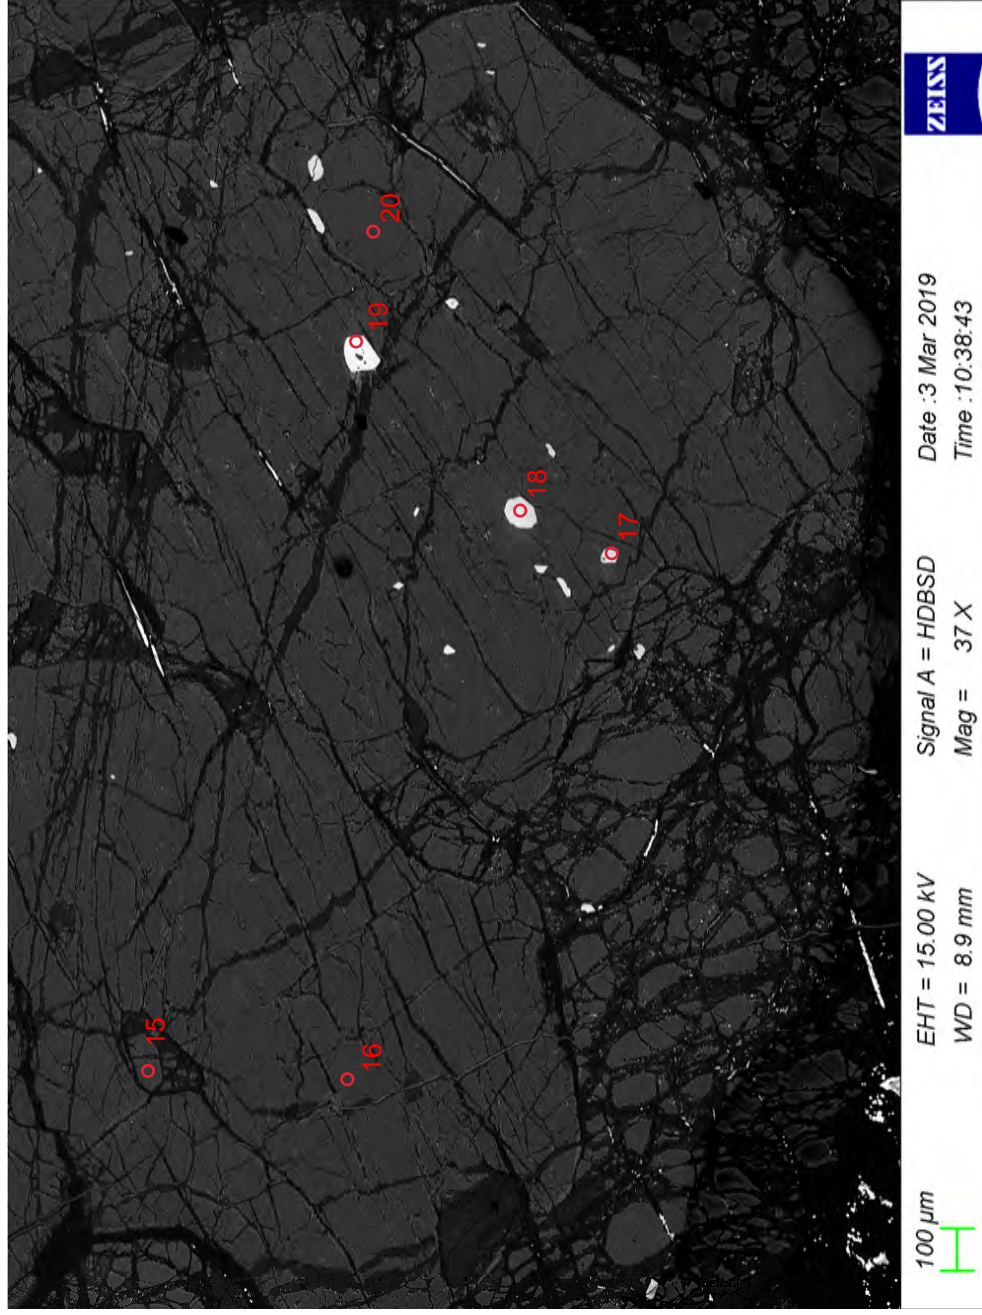



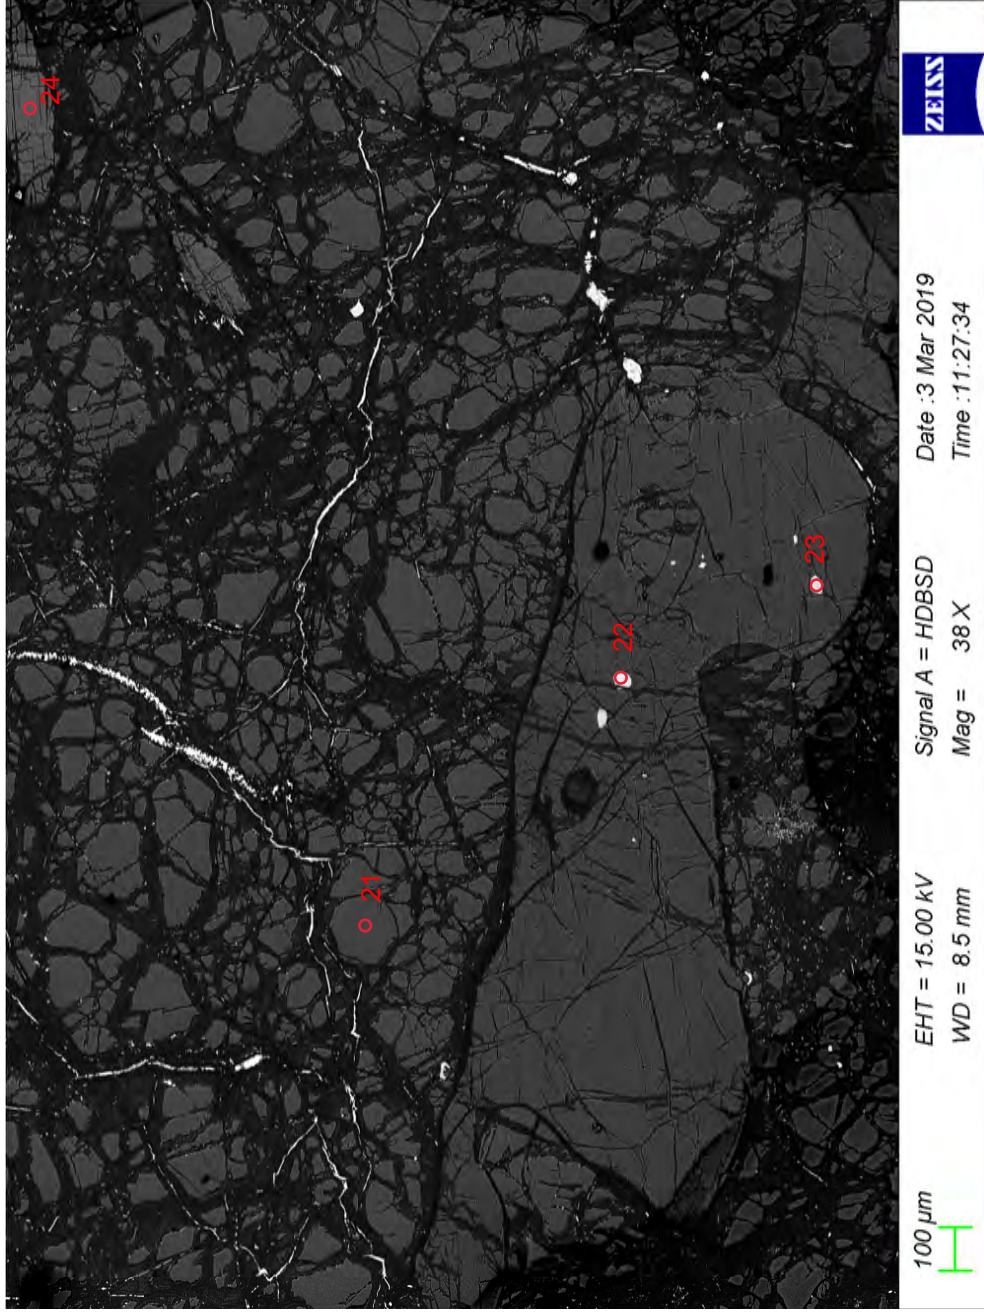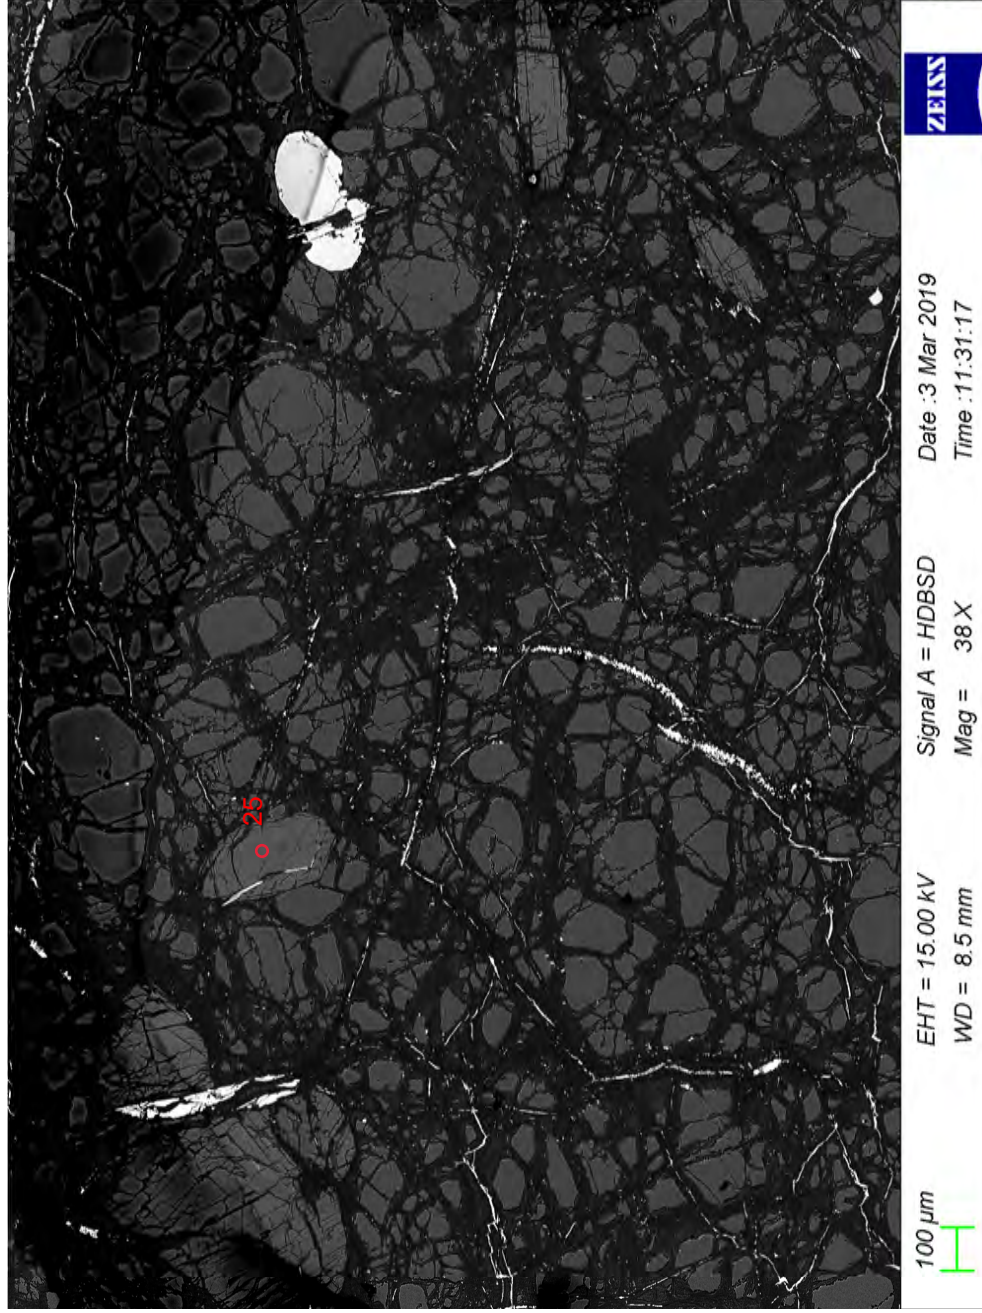



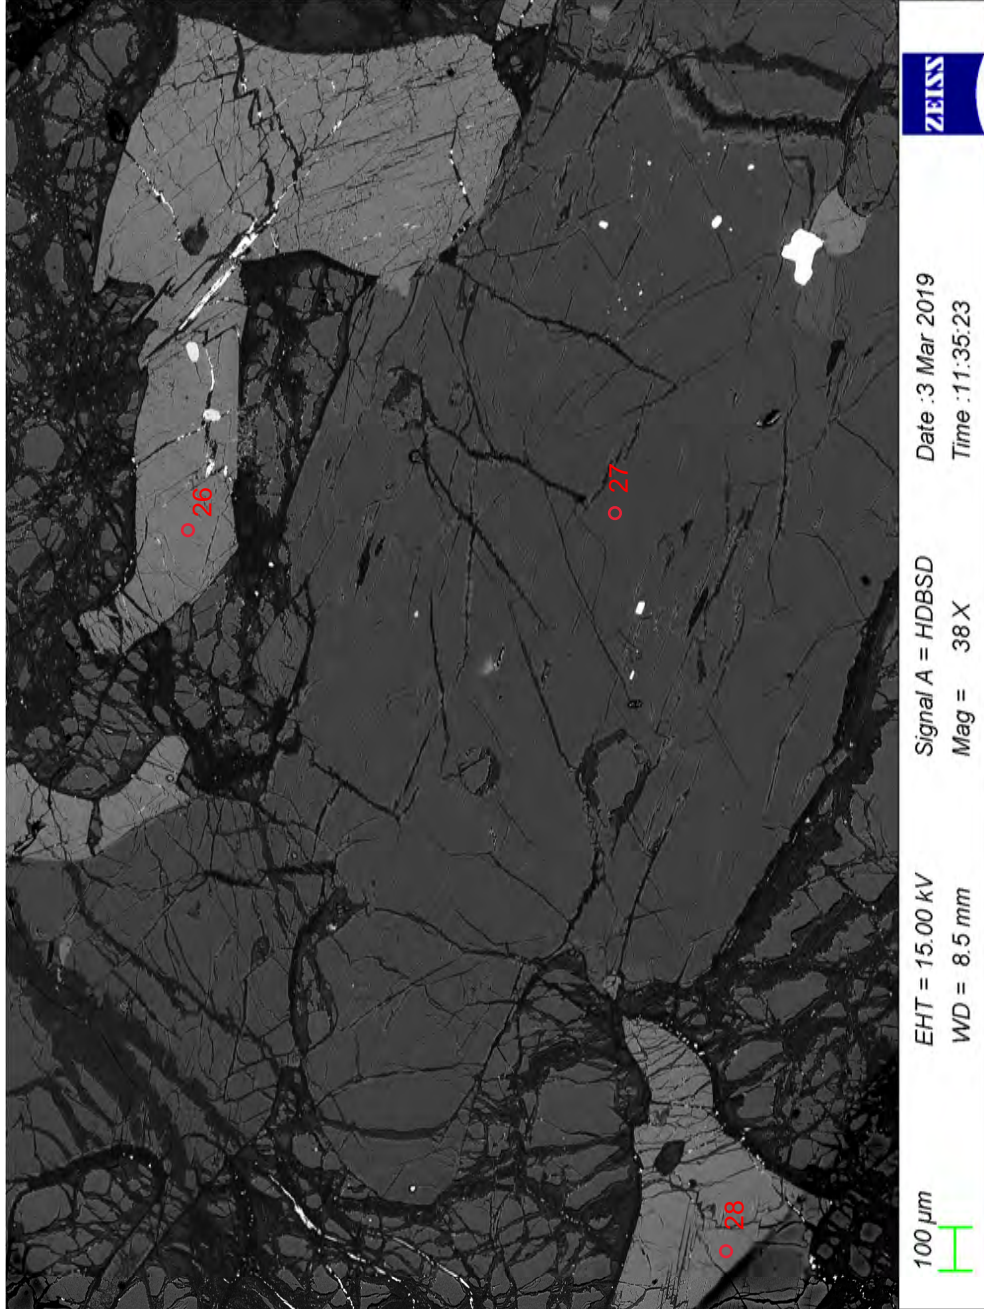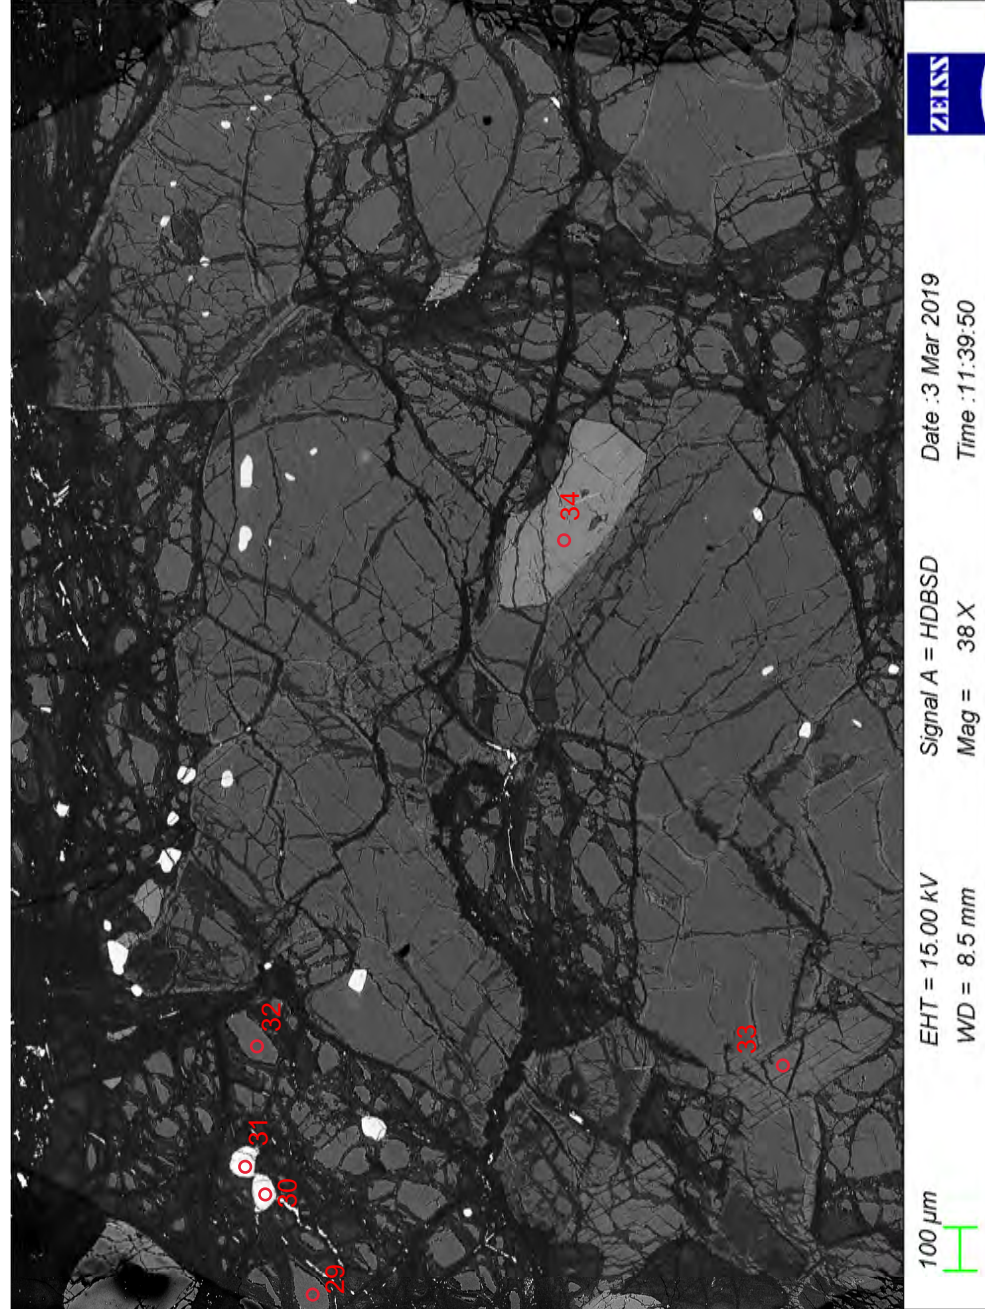



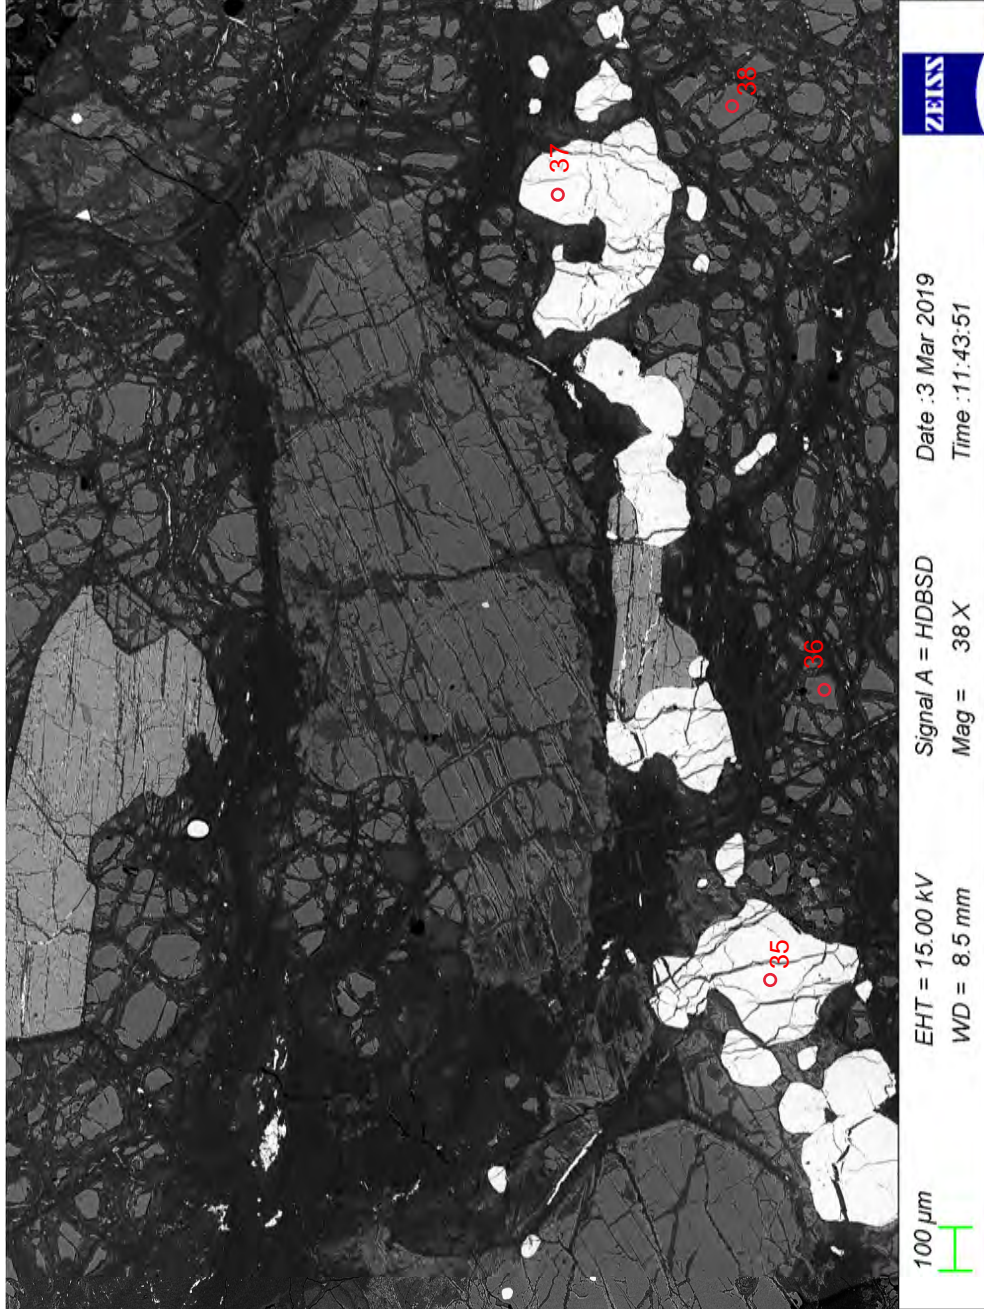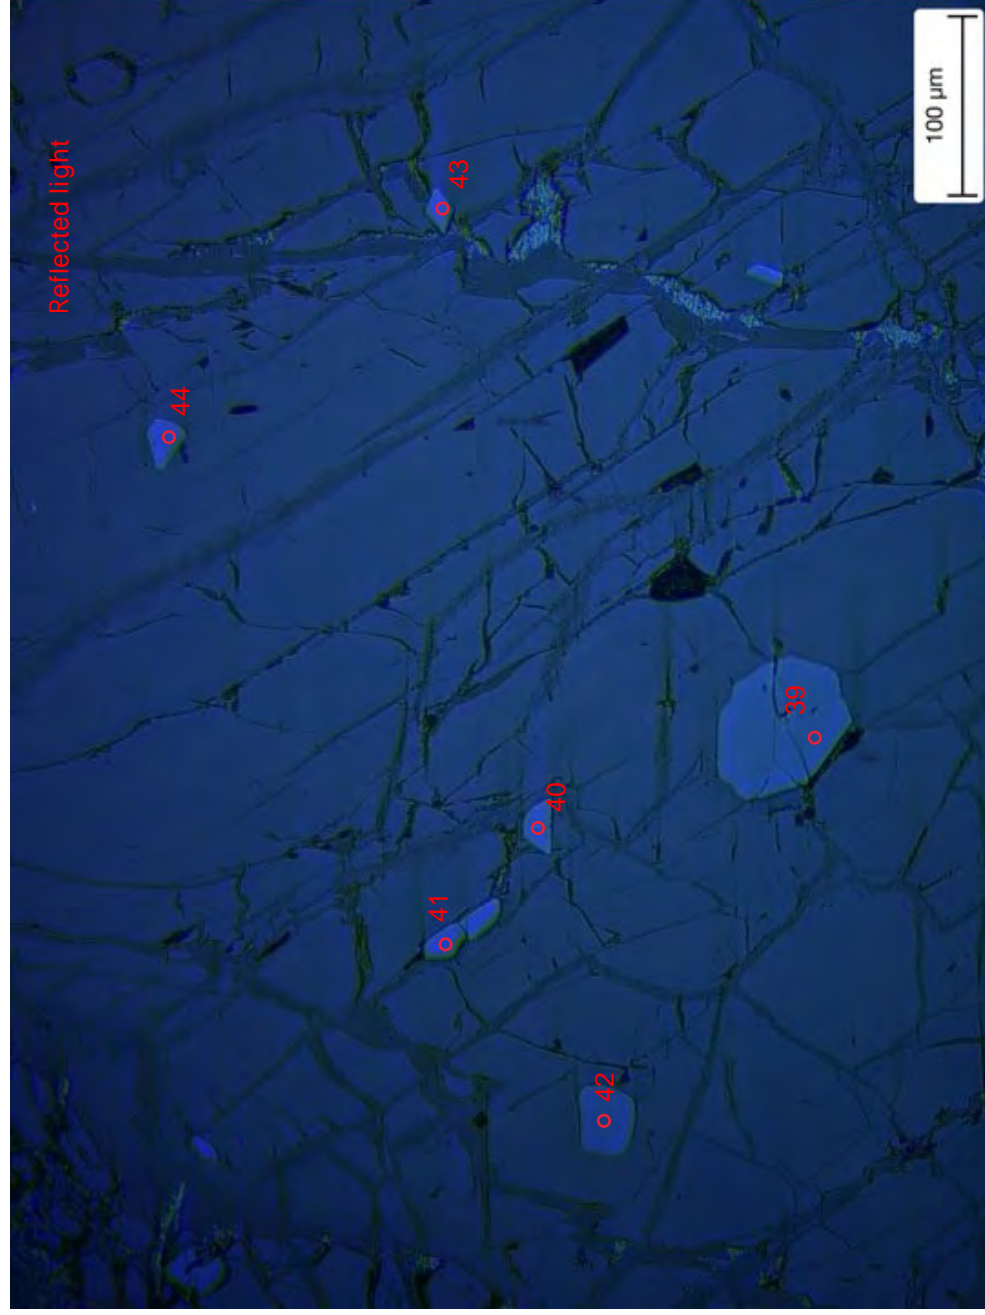



Sample C17-21

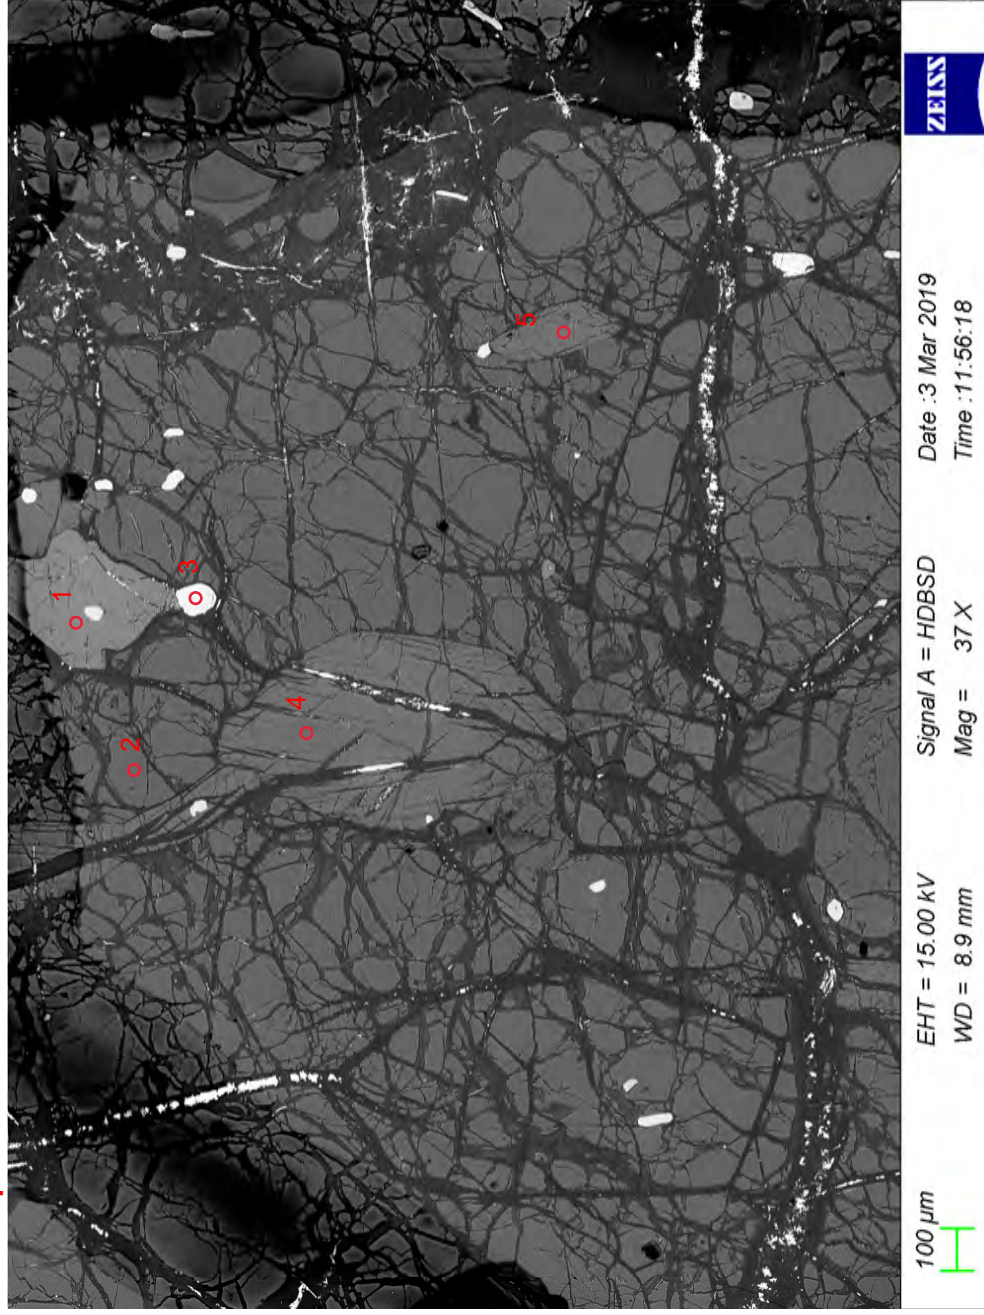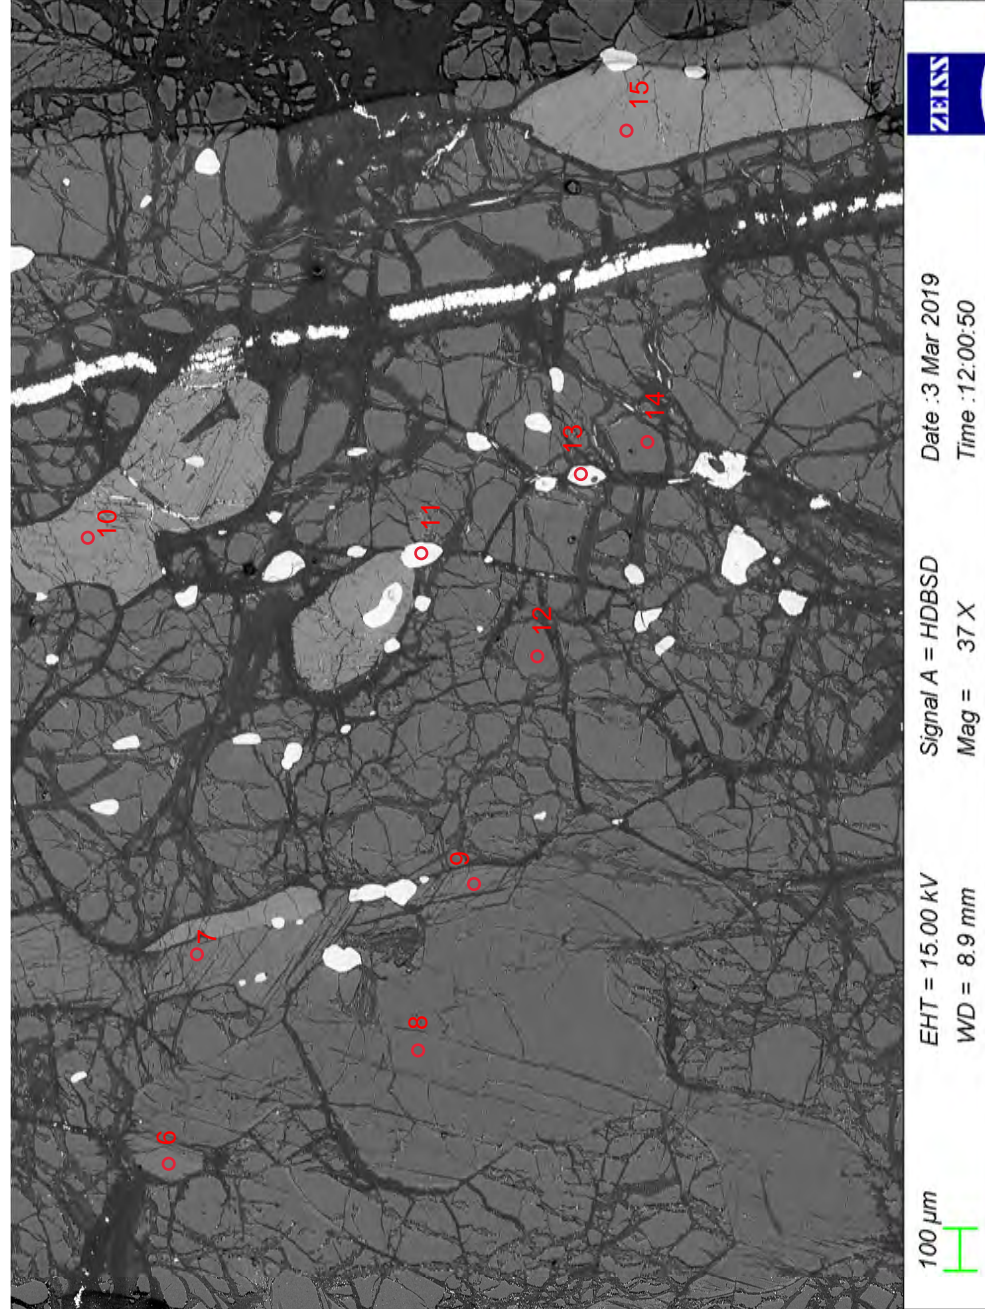



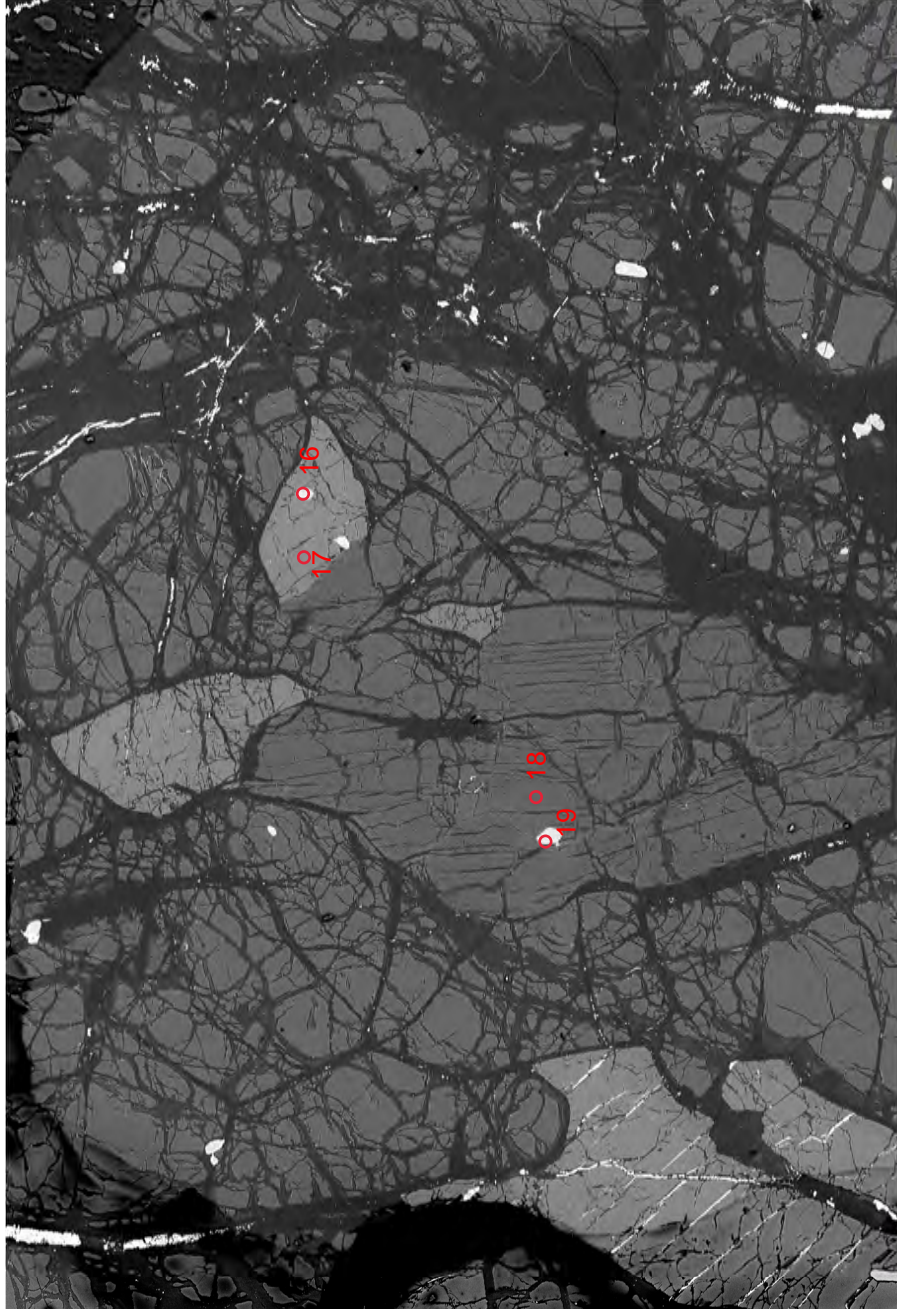

100 μm

EHT = 15.00 kV  
WD = 8.9 mm

Signal A = HDBSD  
Mag = 37 X

Date : 3 Mar 2019  
Time : 12:05:50

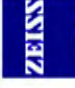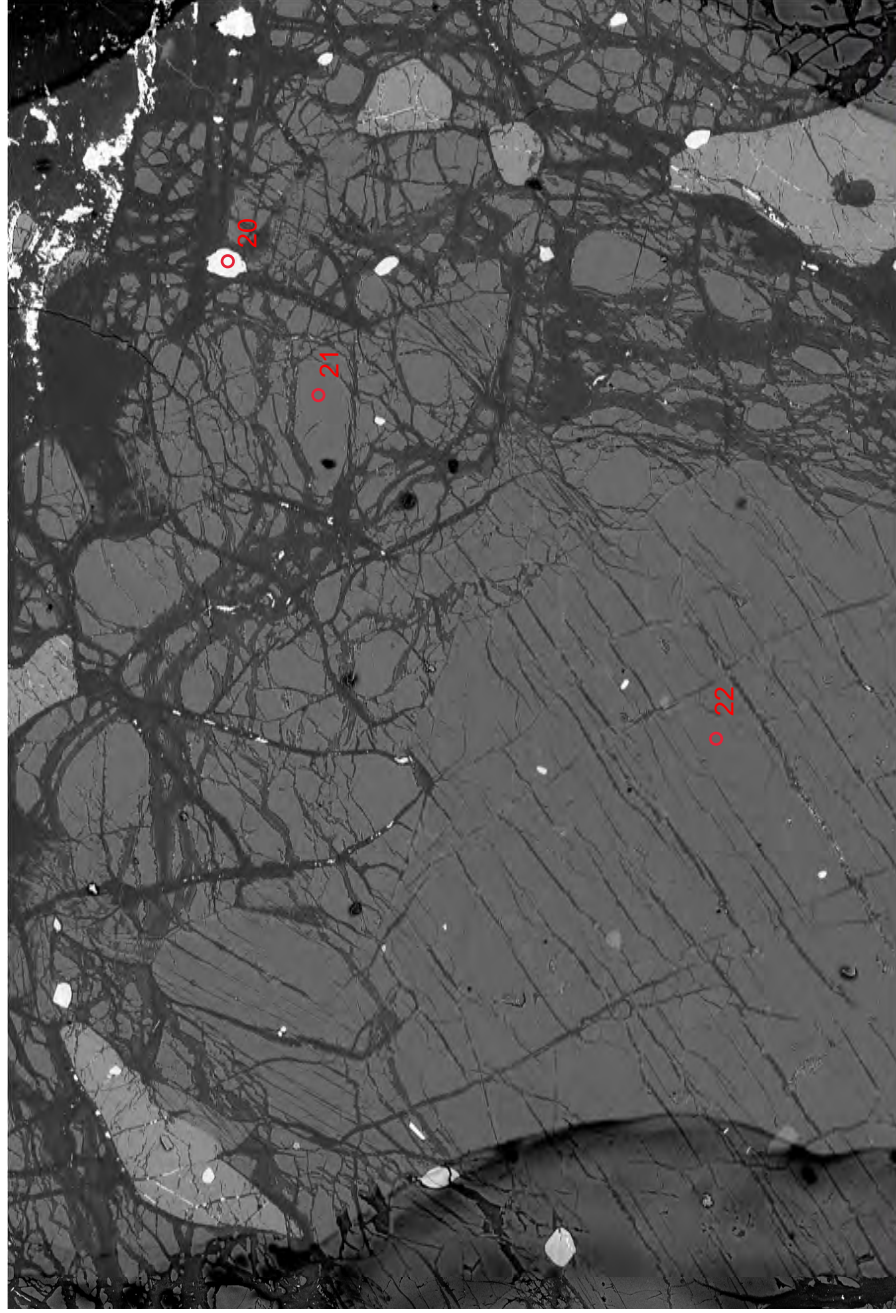

100 μm

EHT = 15.00 kV  
WD = 8.9 mm

Signal A = HDBSD  
Mag = 37 X

Date : 3 Mar 2019  
Time : 12:10:38

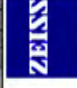



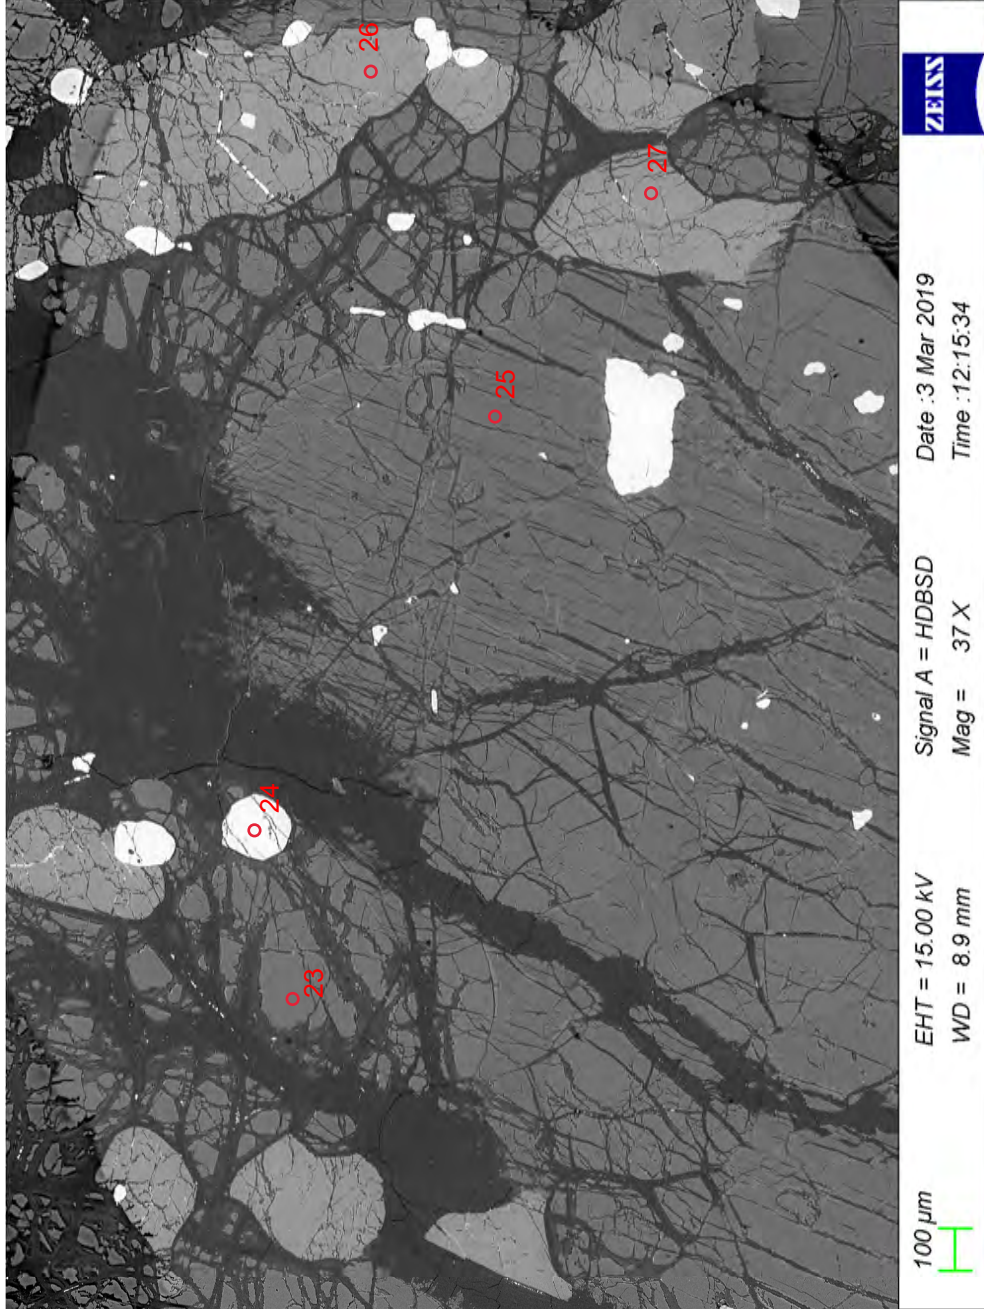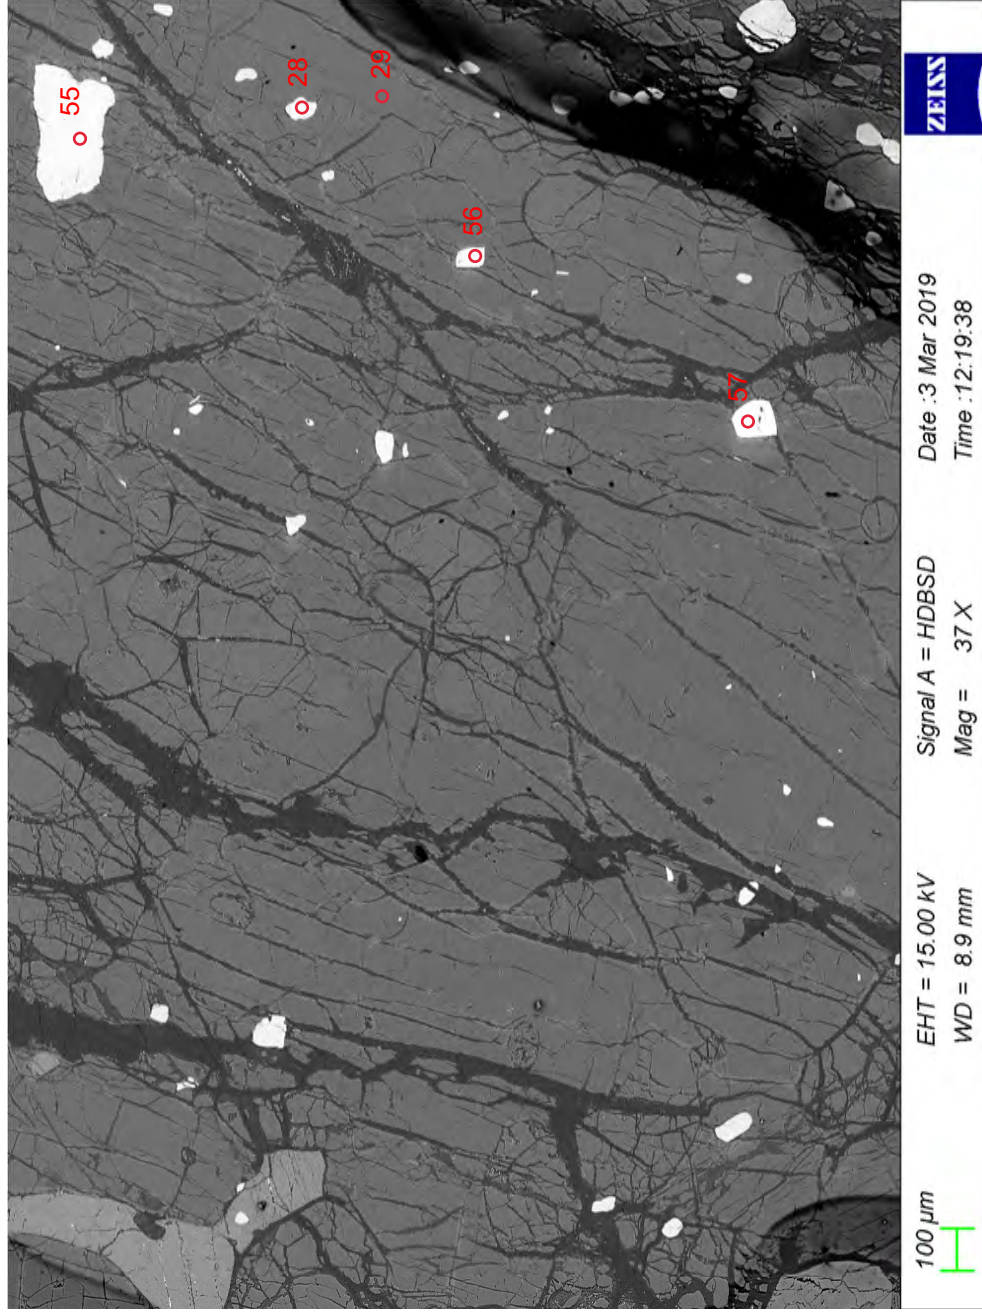



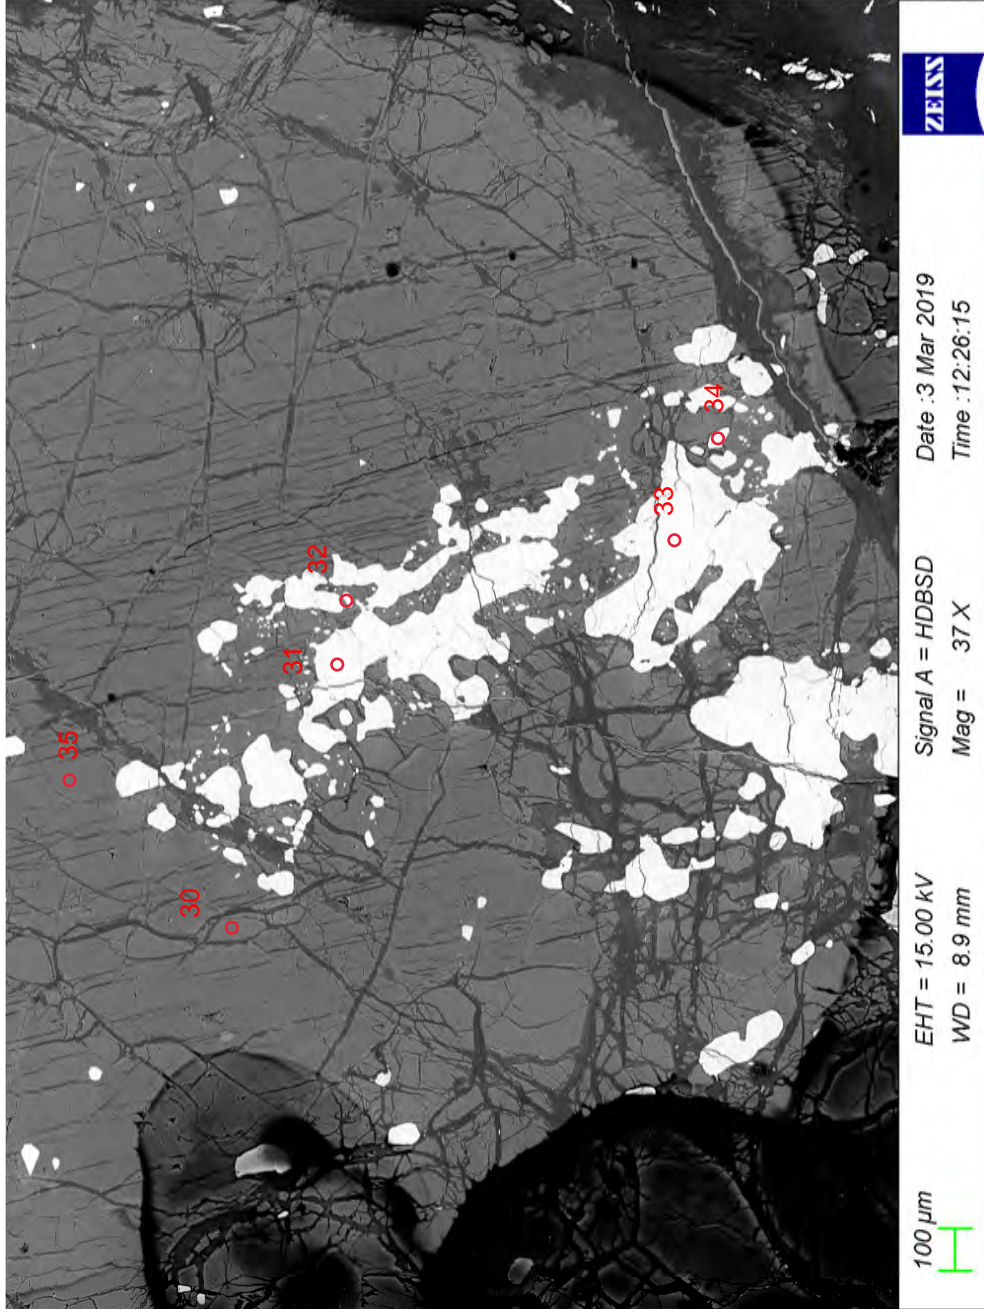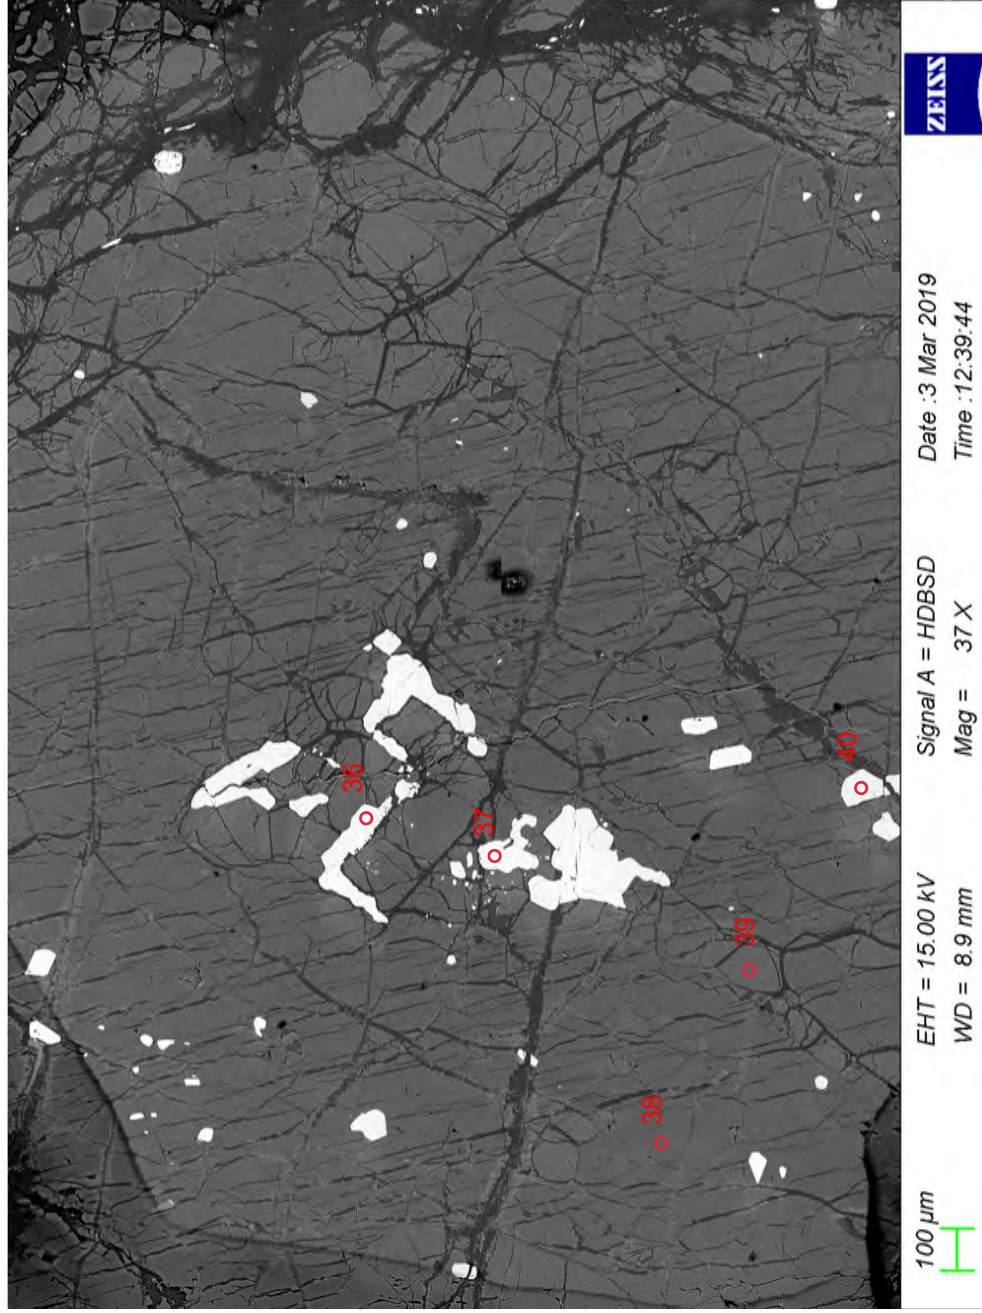



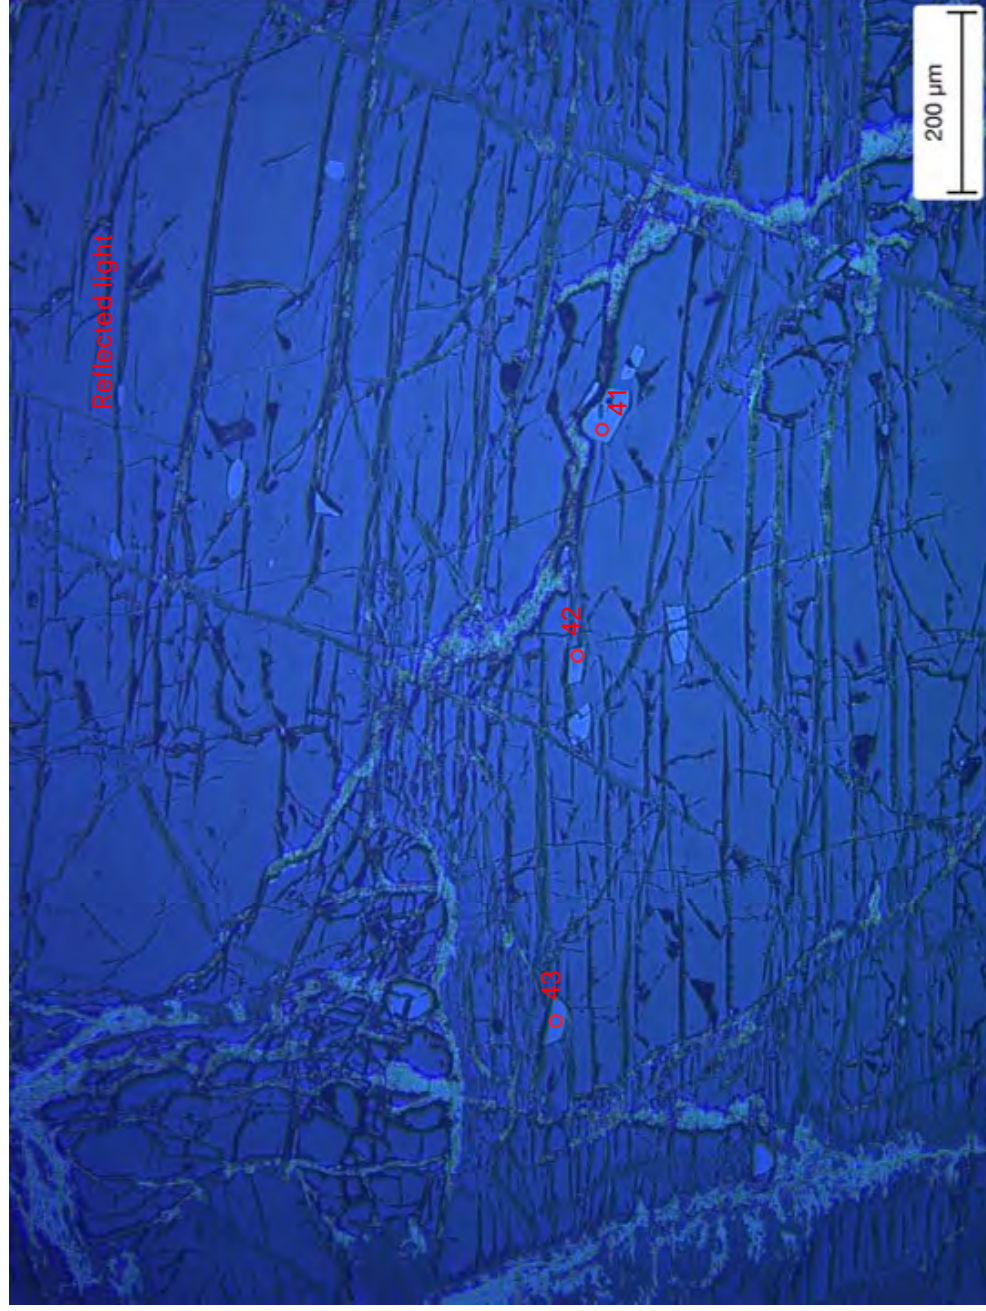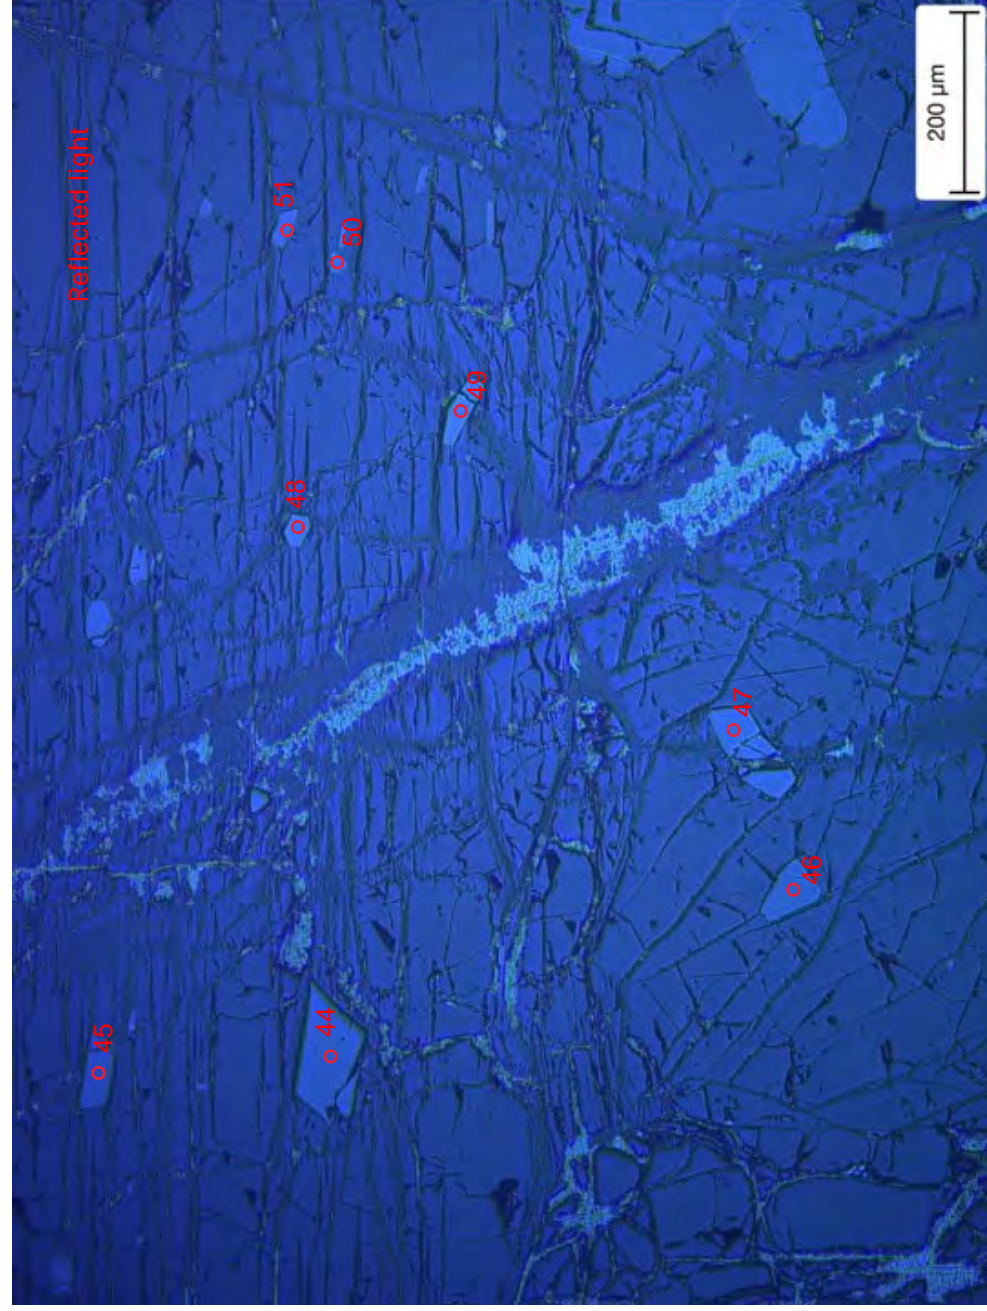



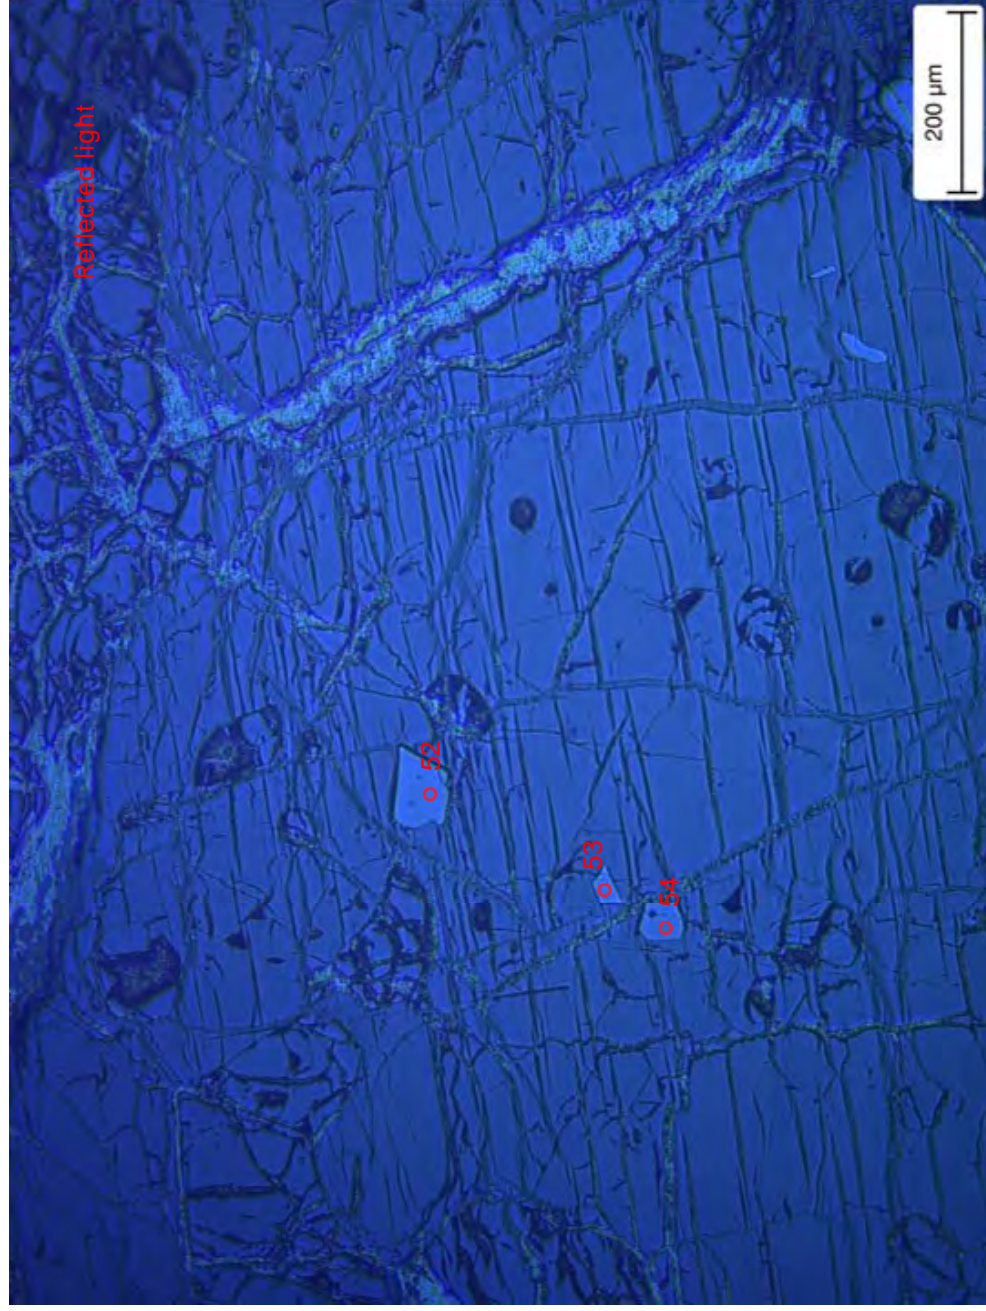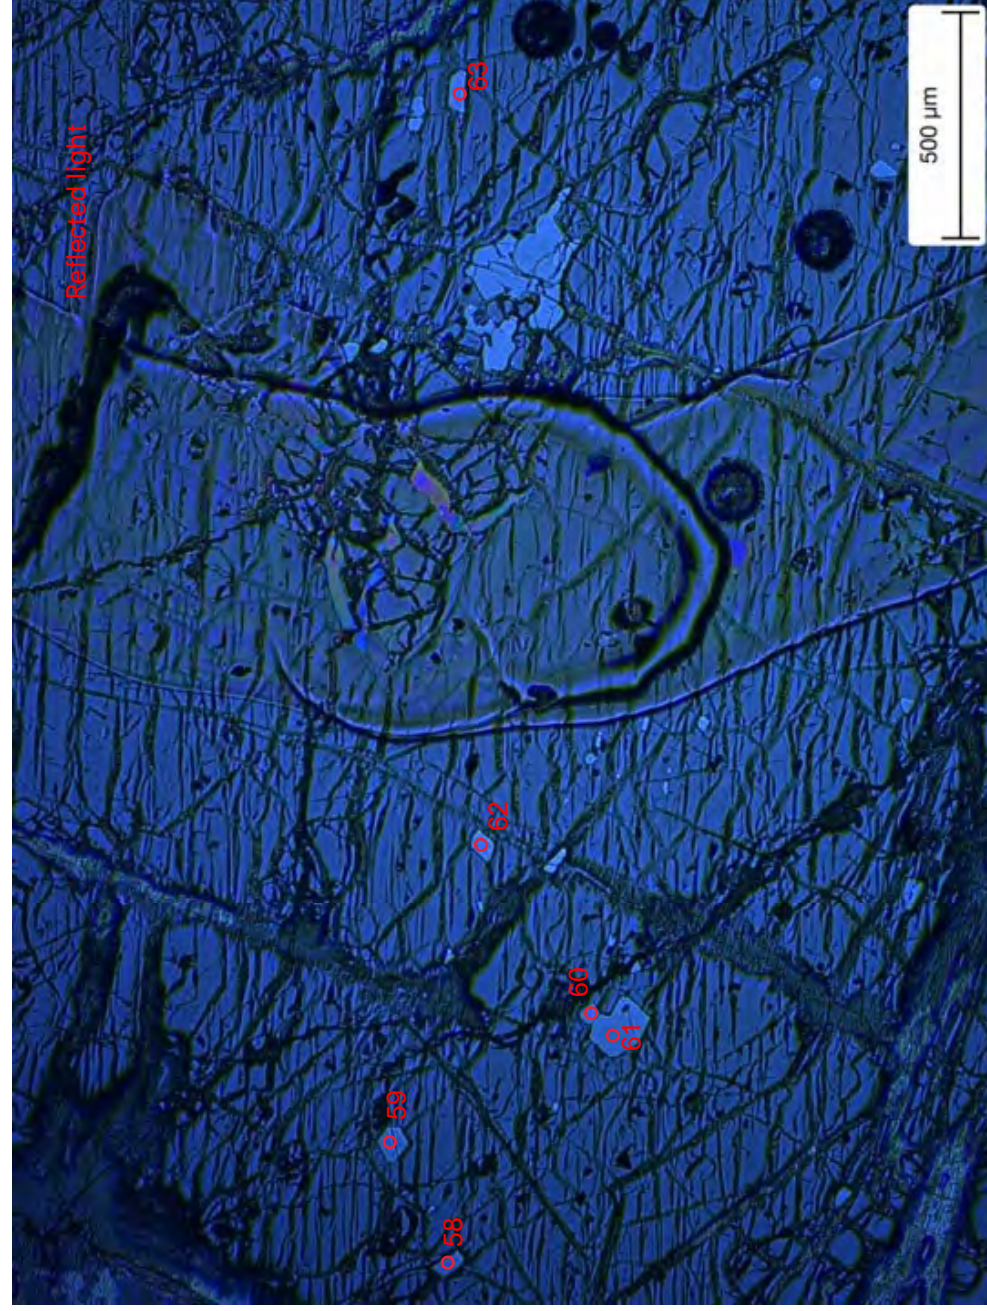



Sample C17-59

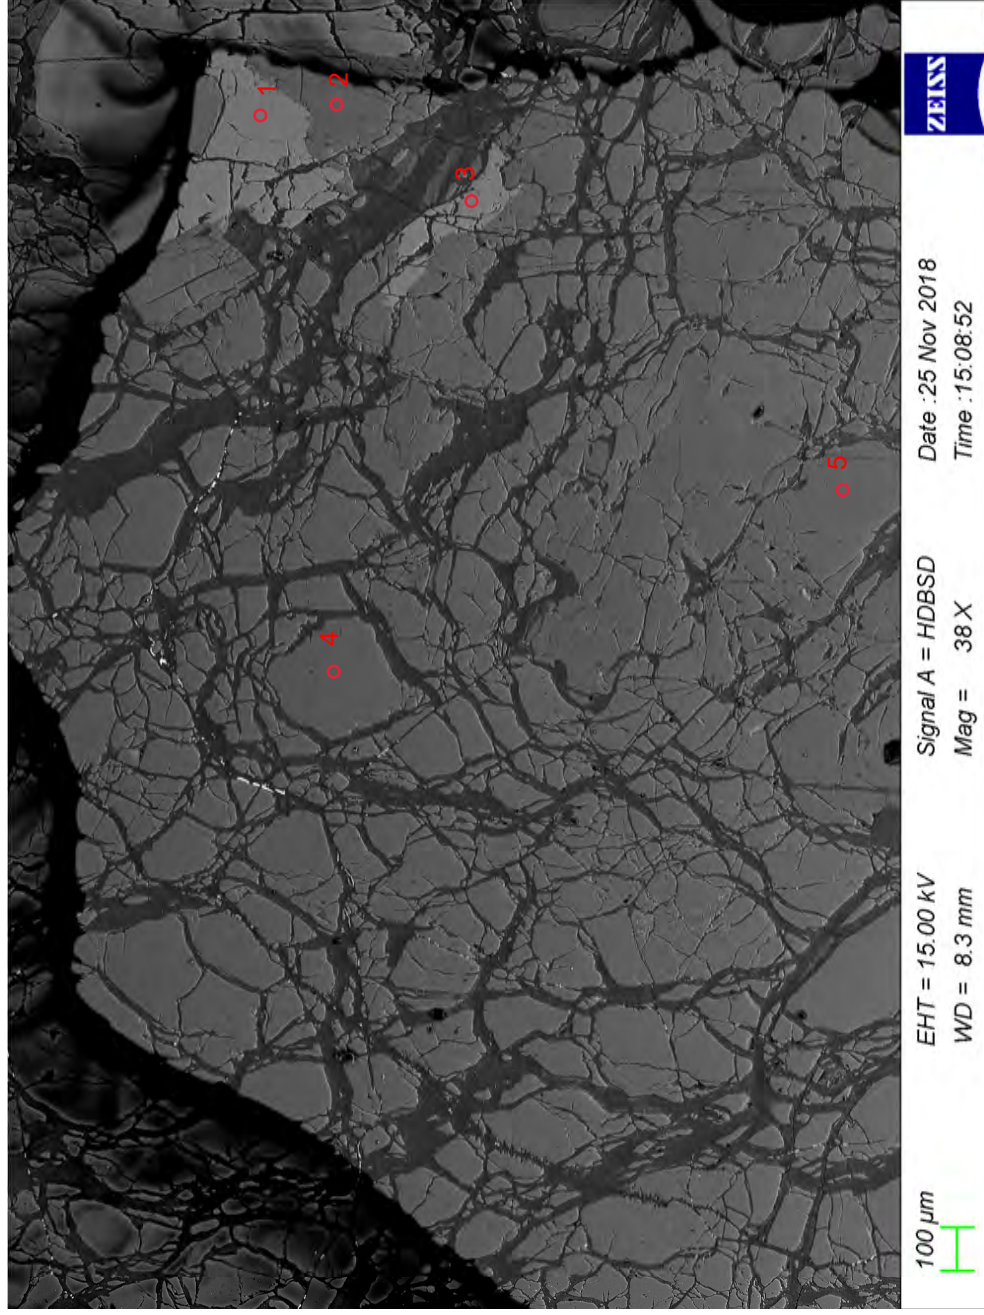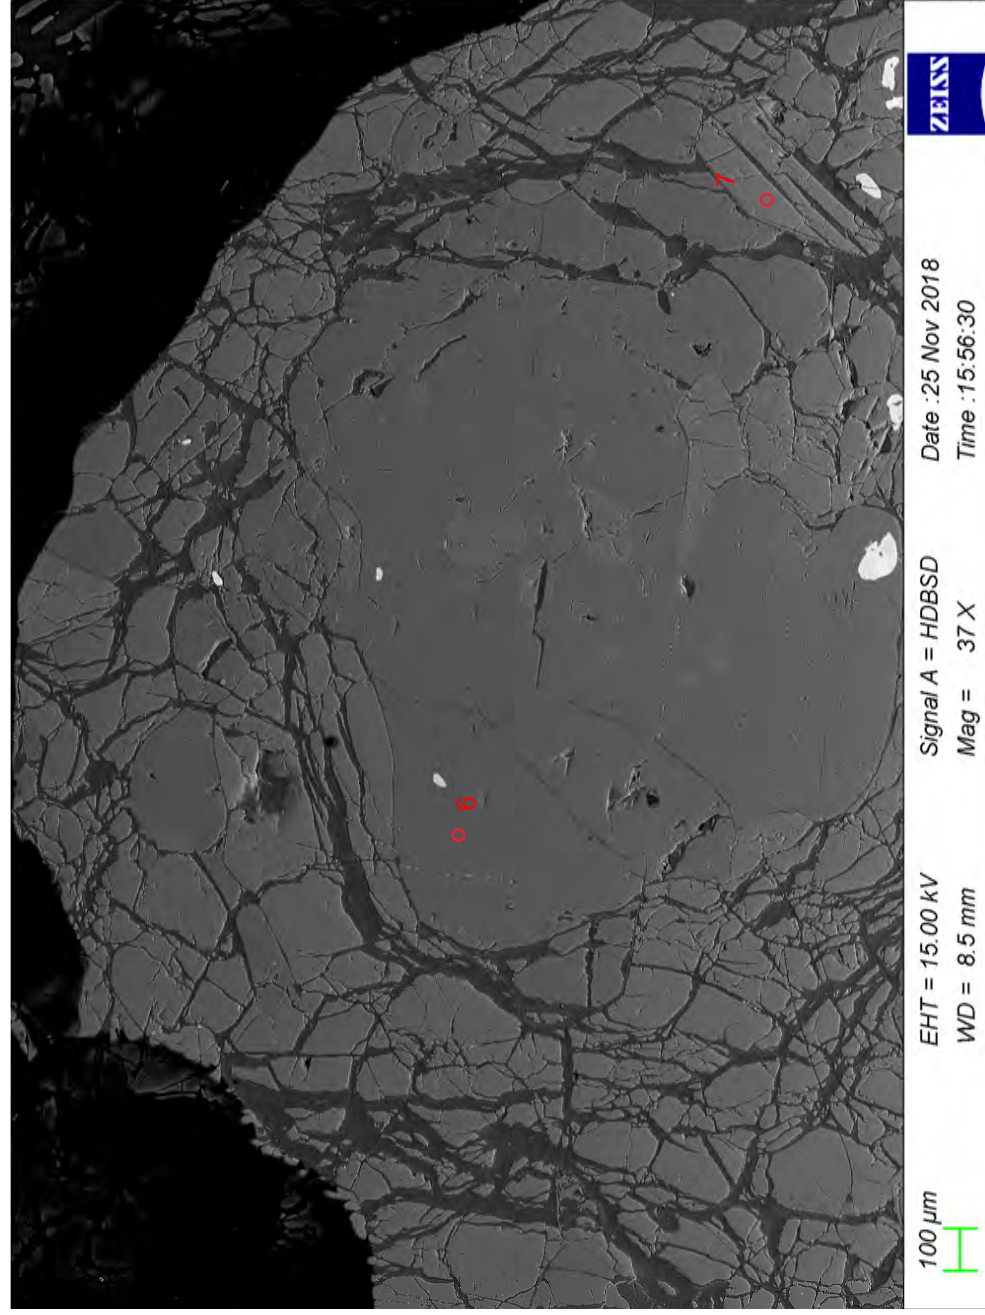



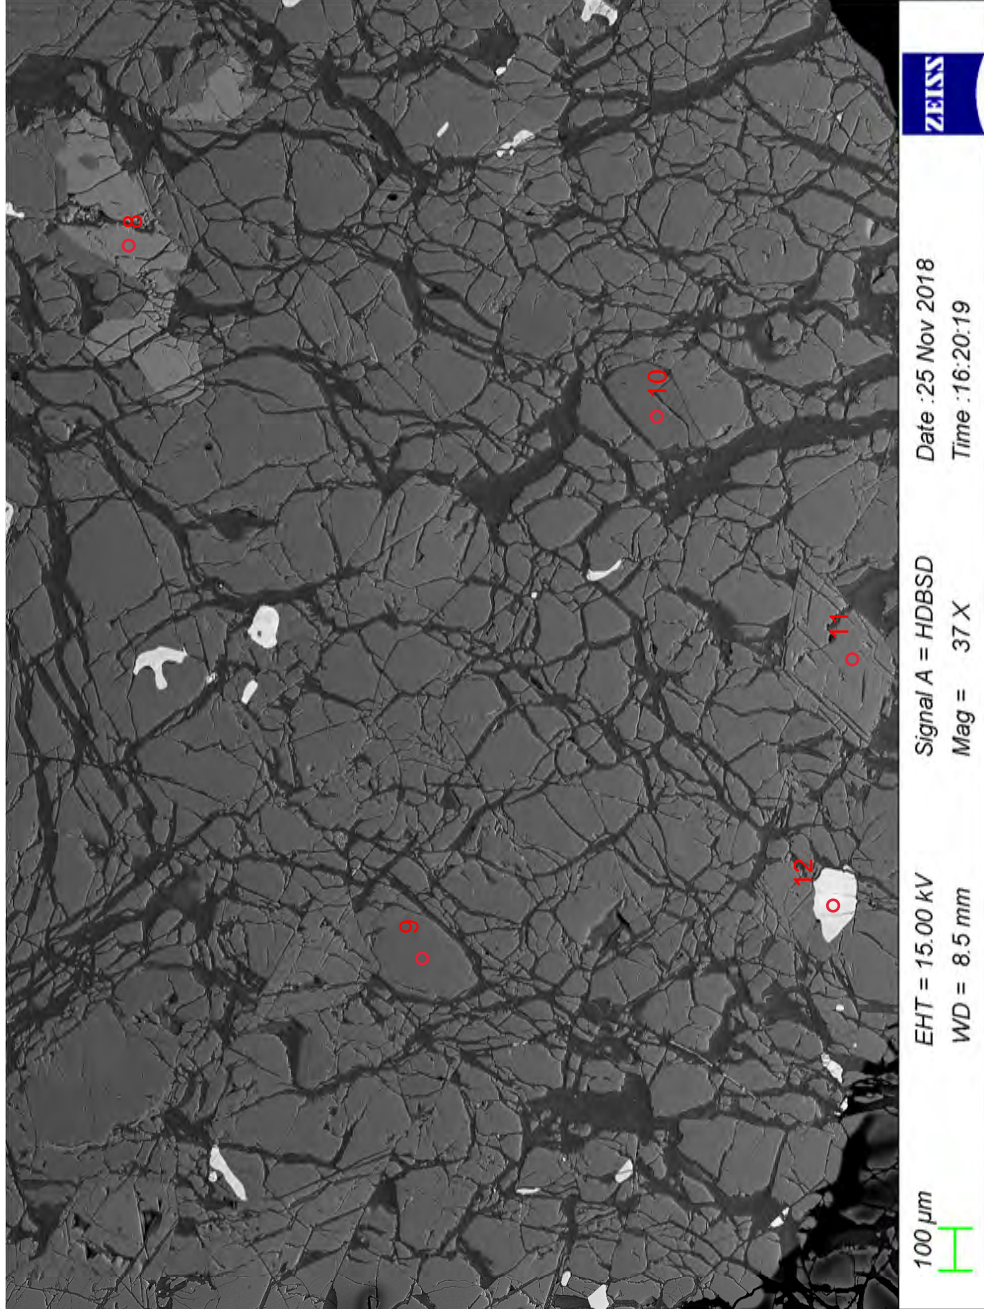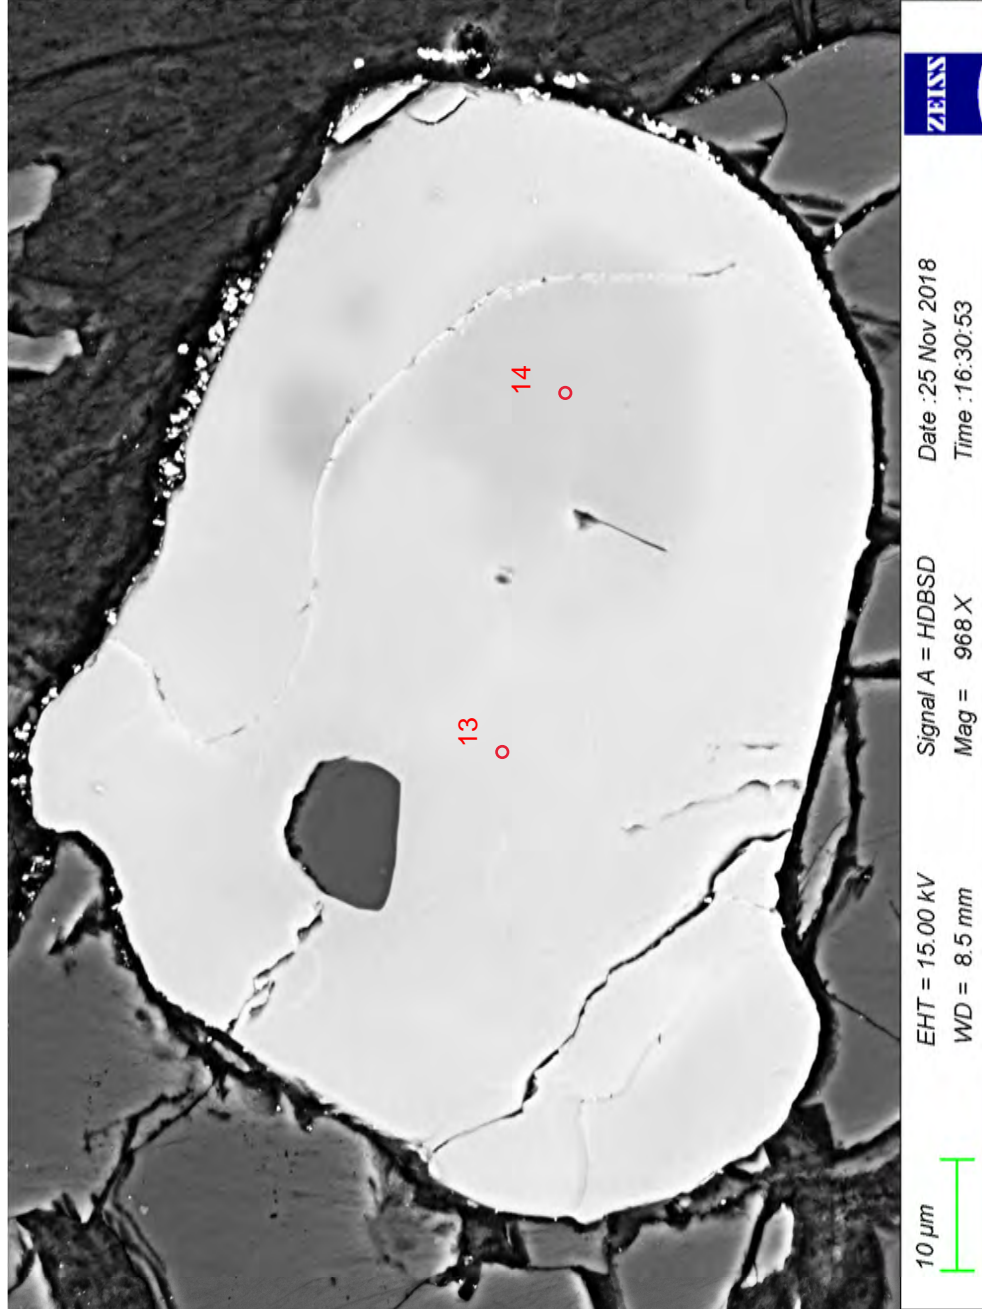



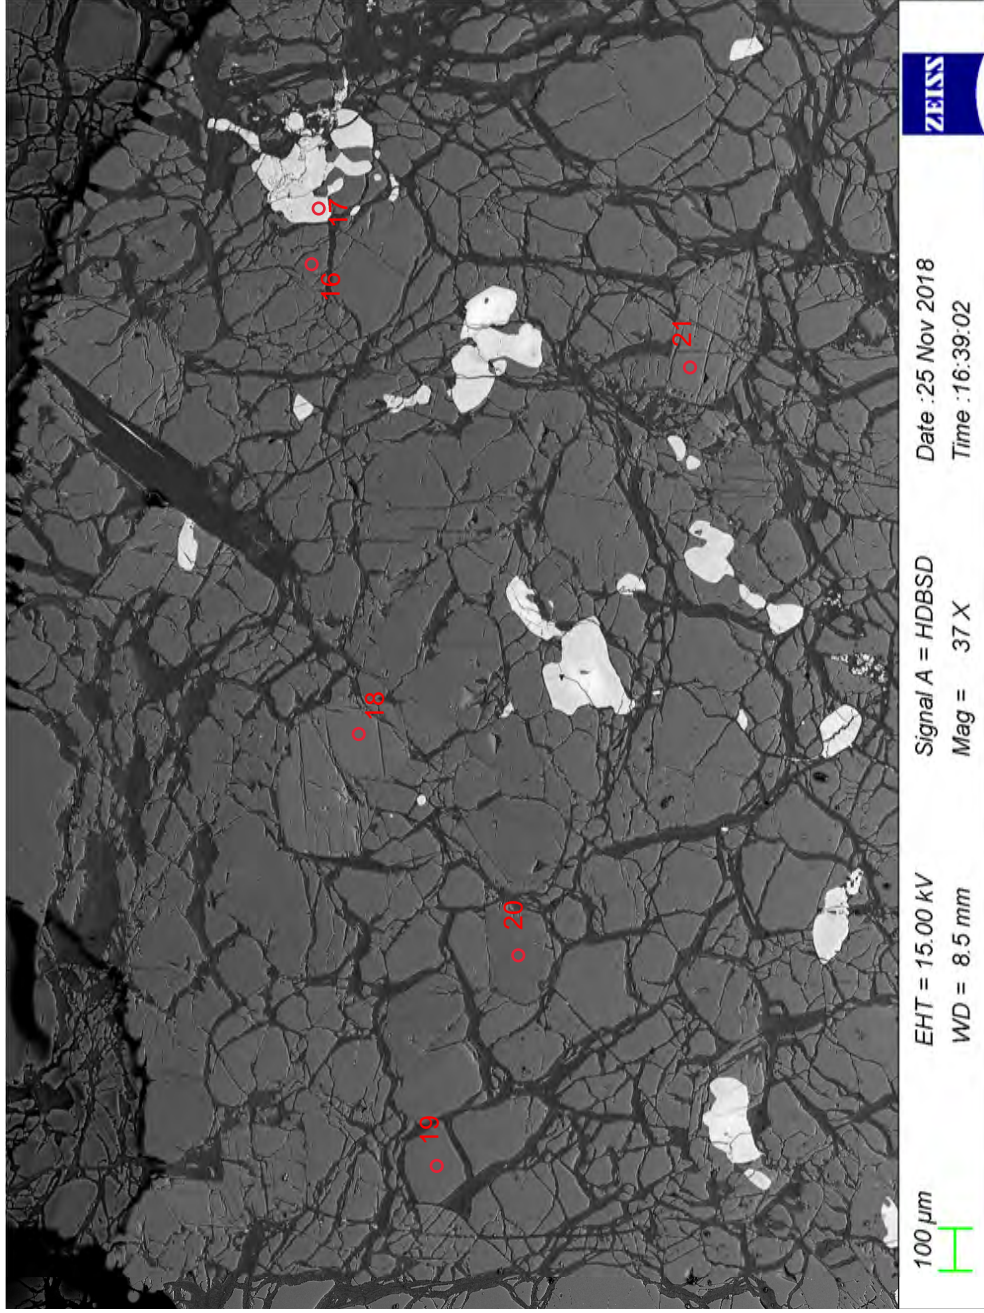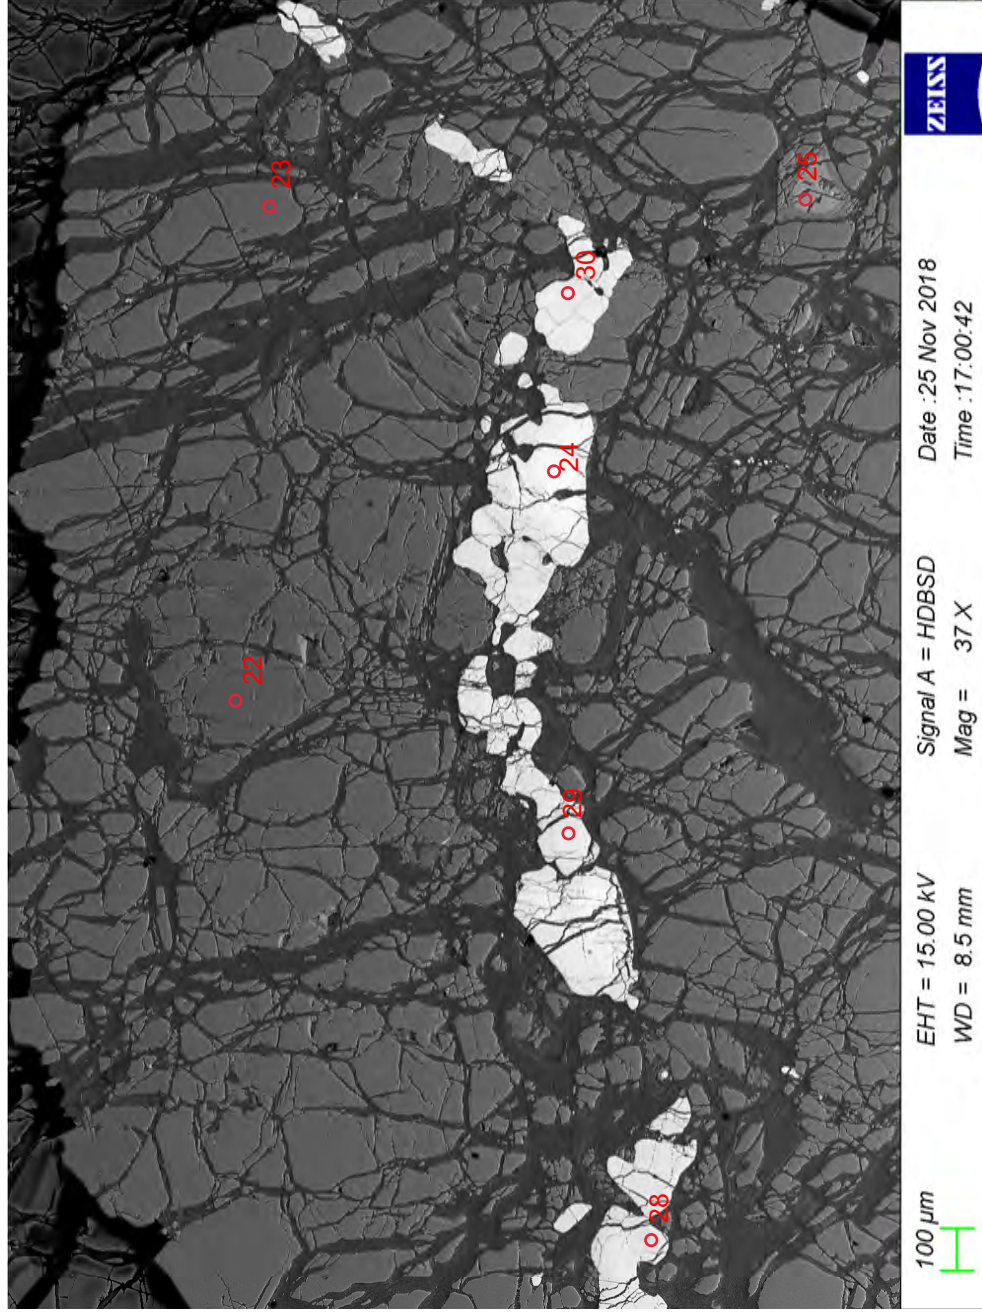

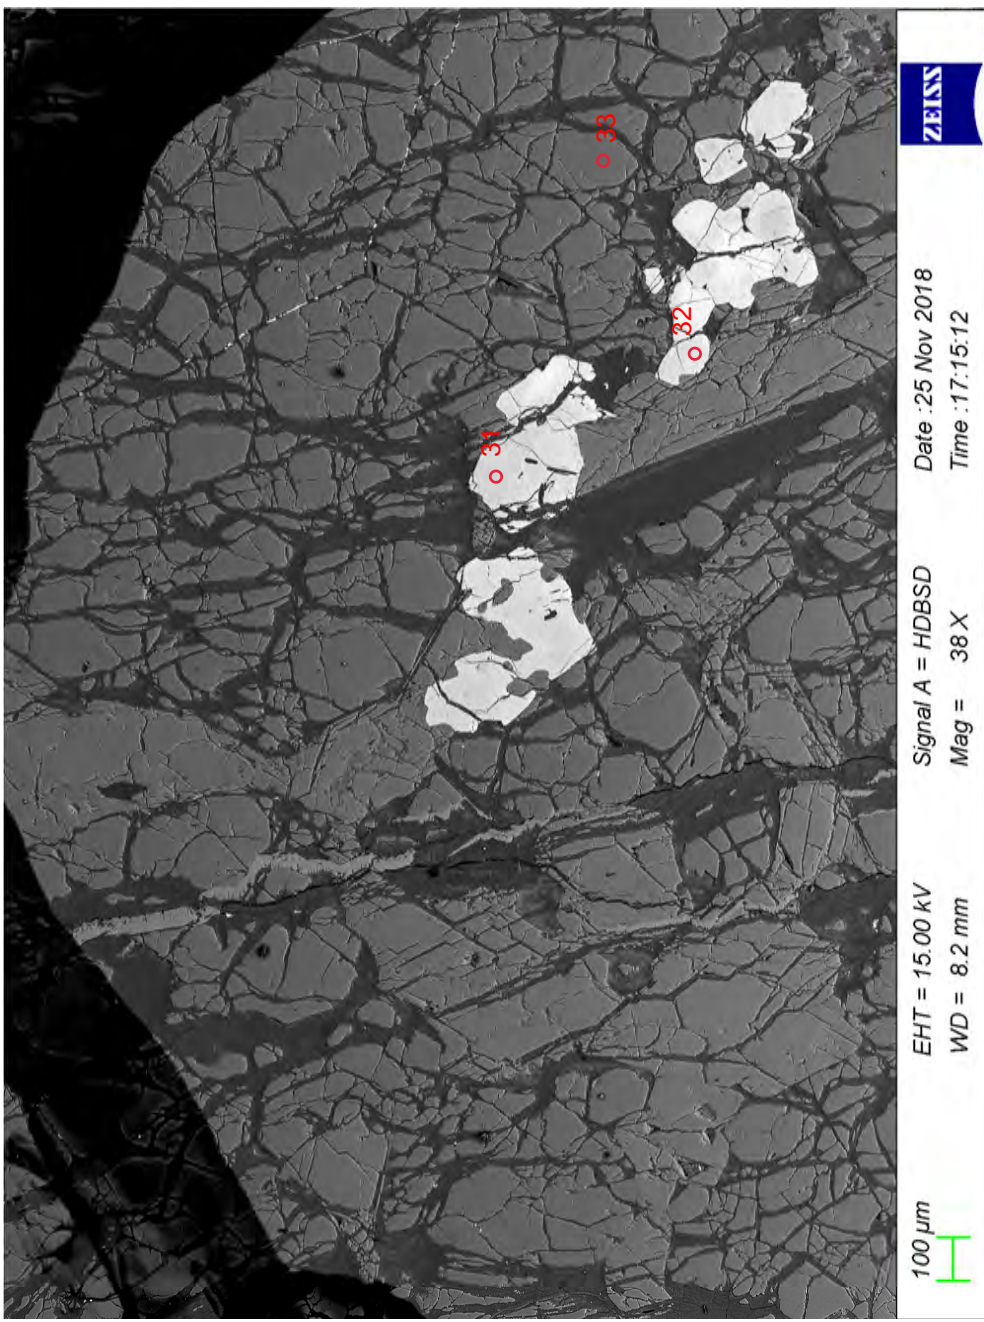



Sample C17-62

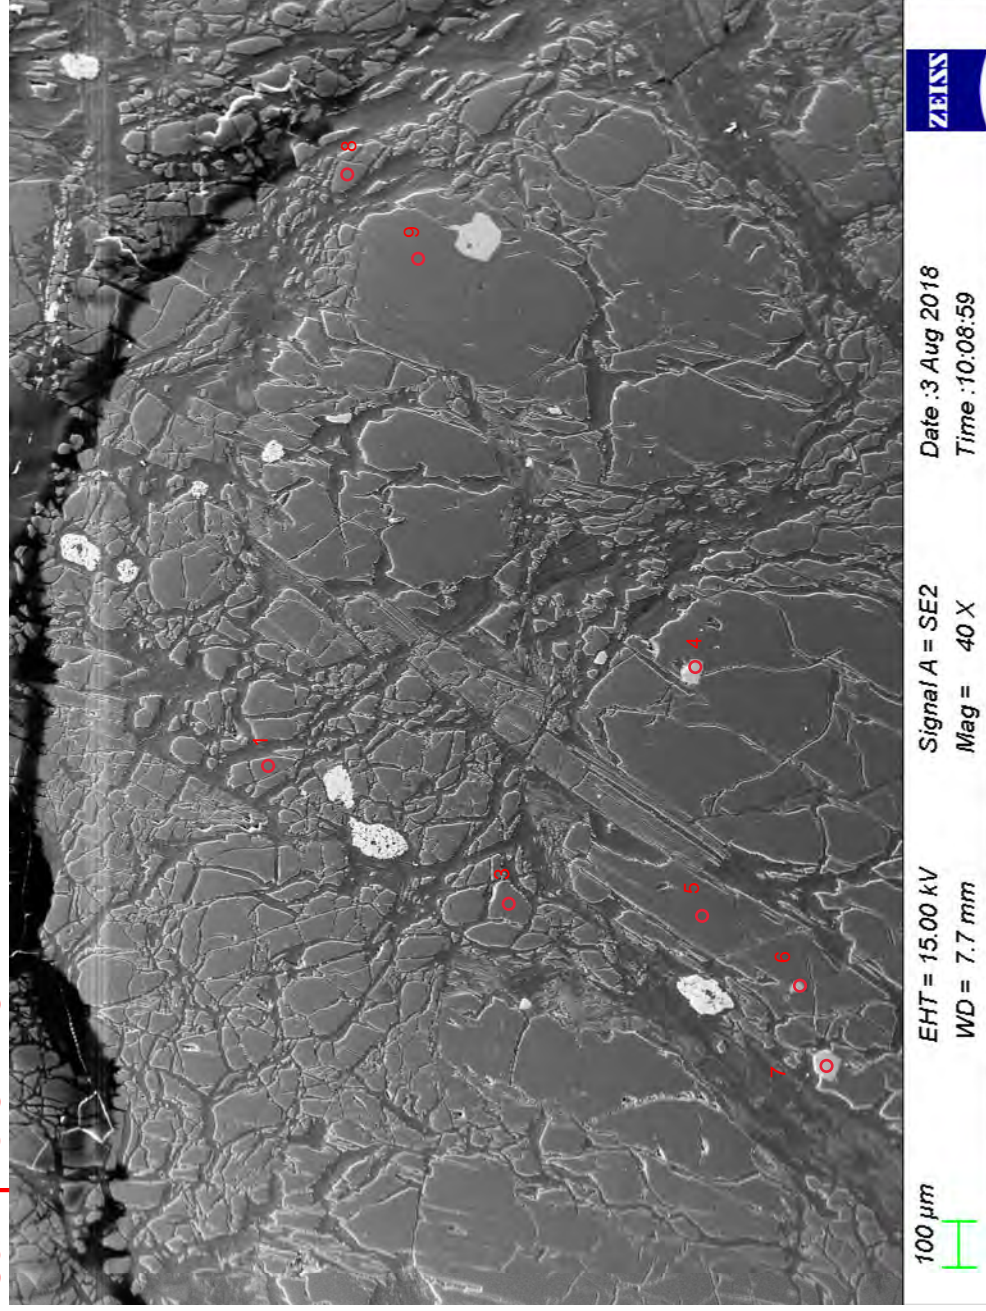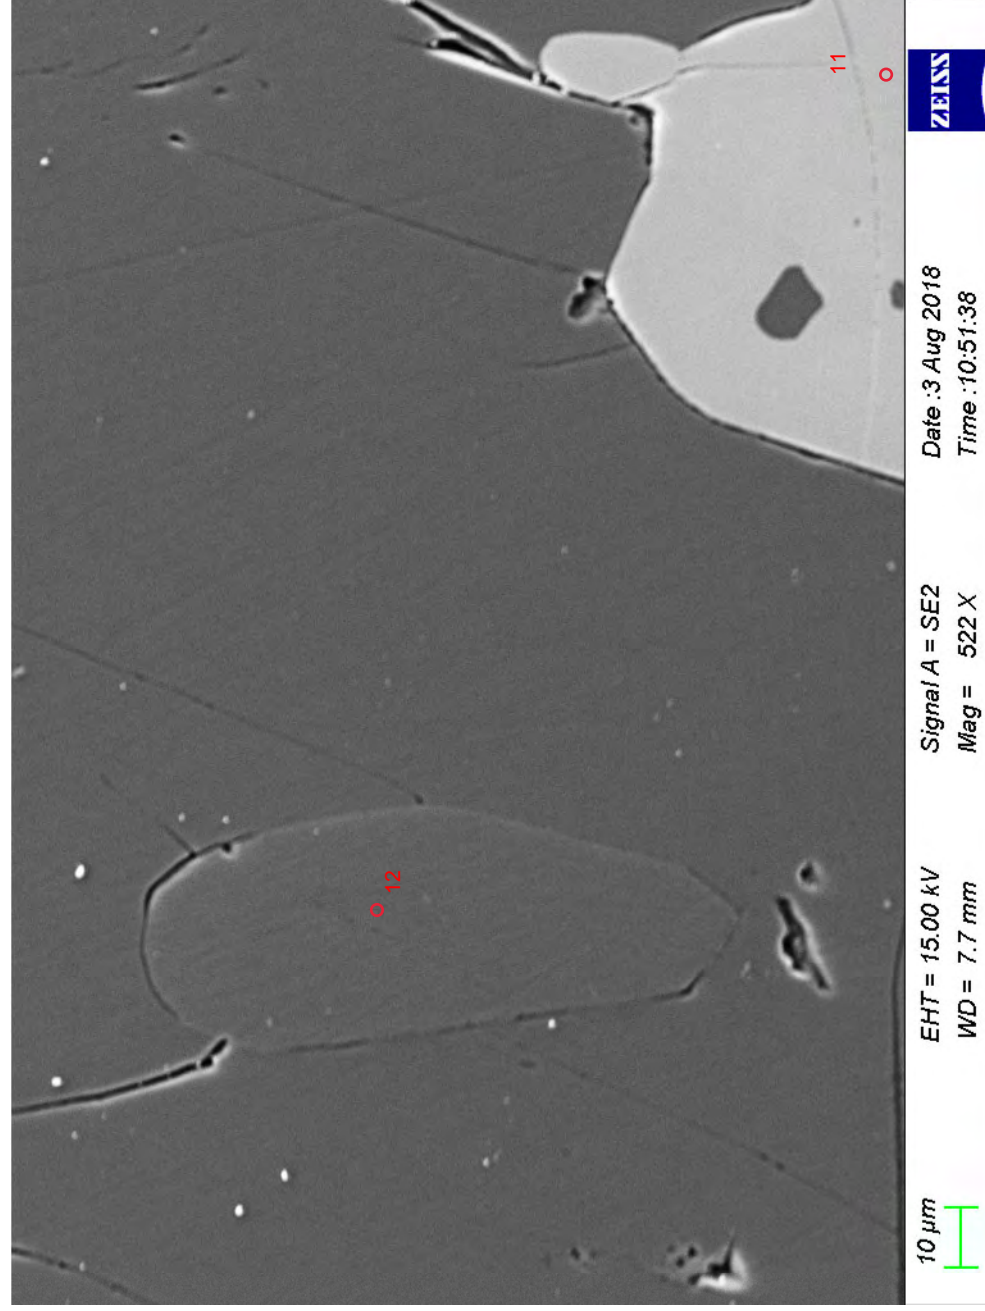



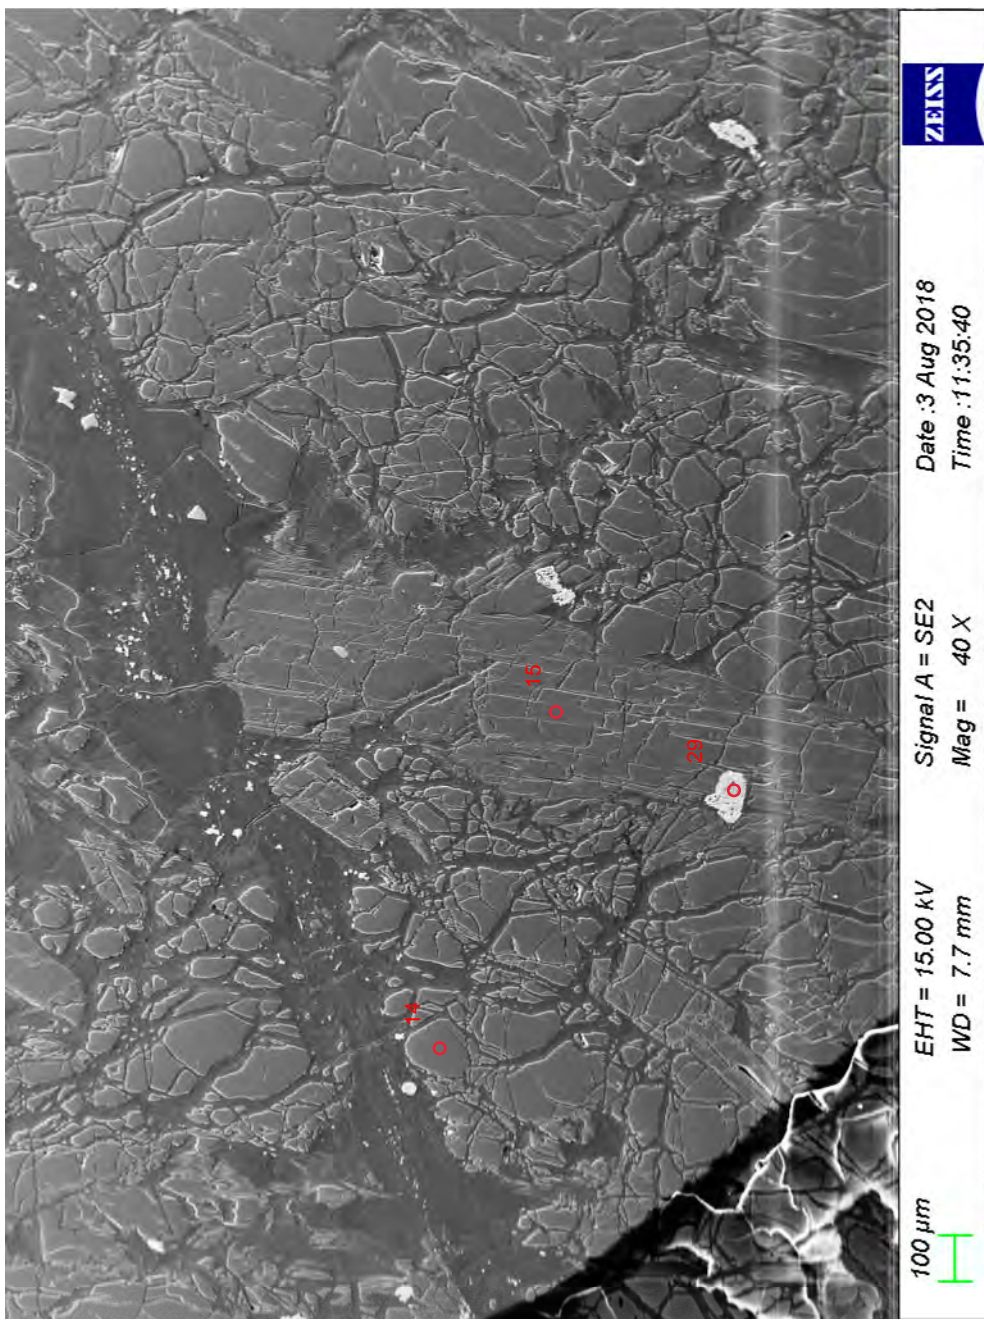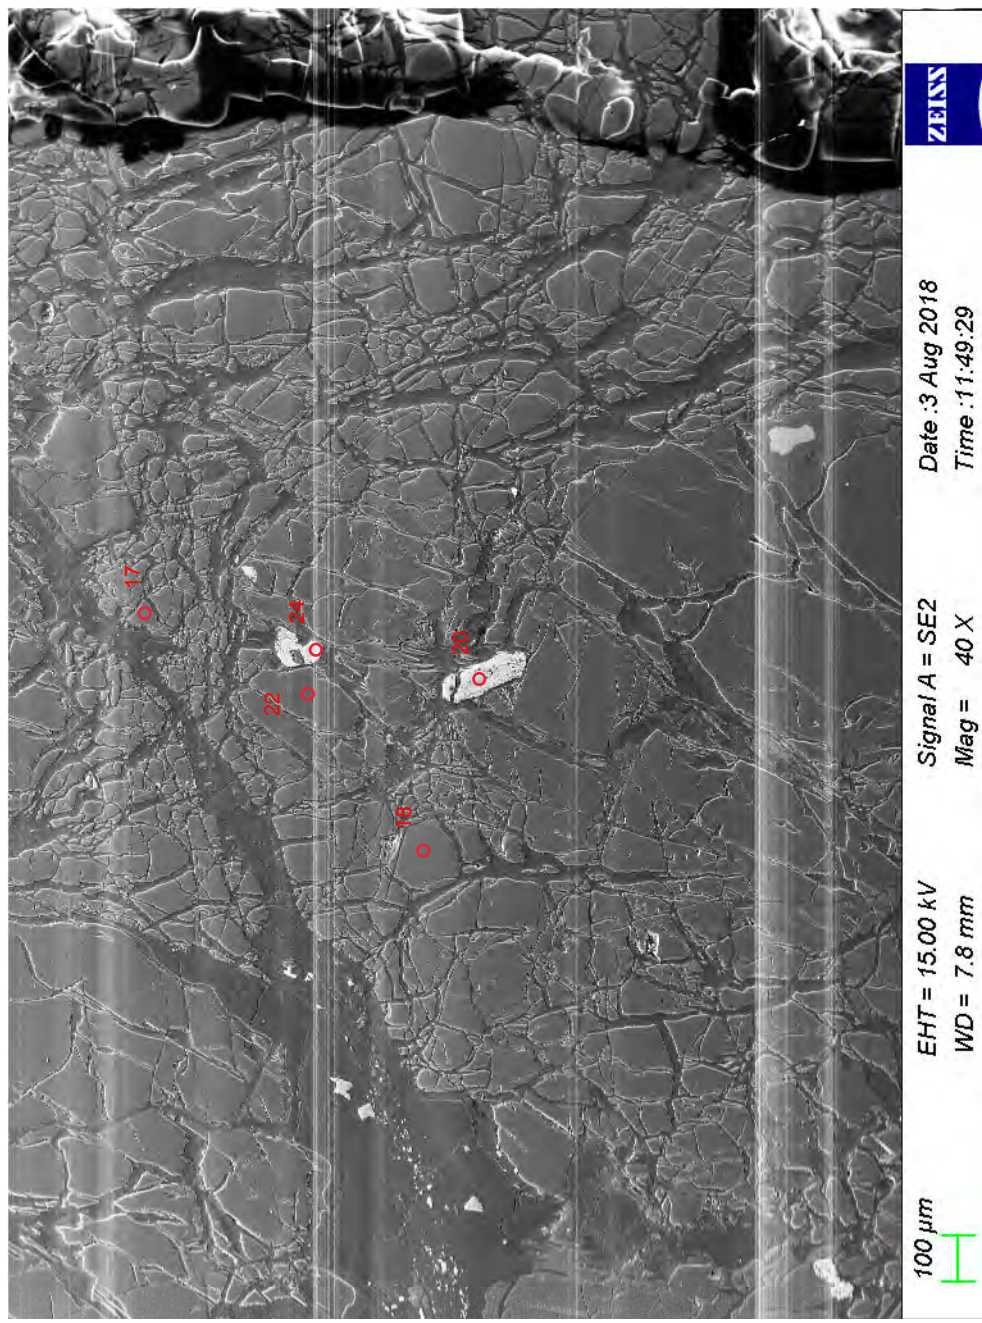



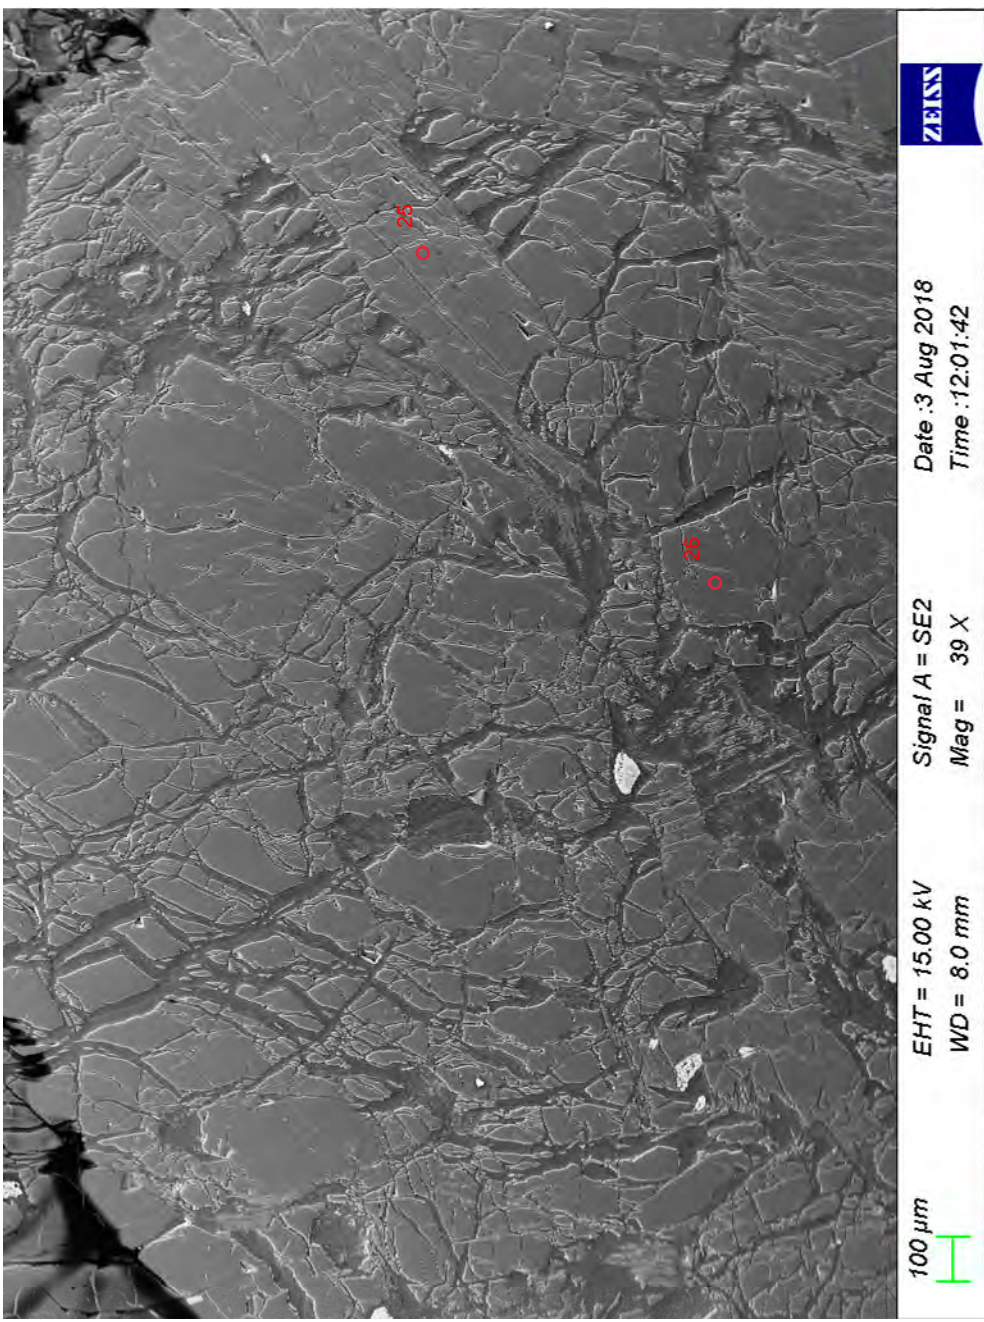

# Sample C17-63

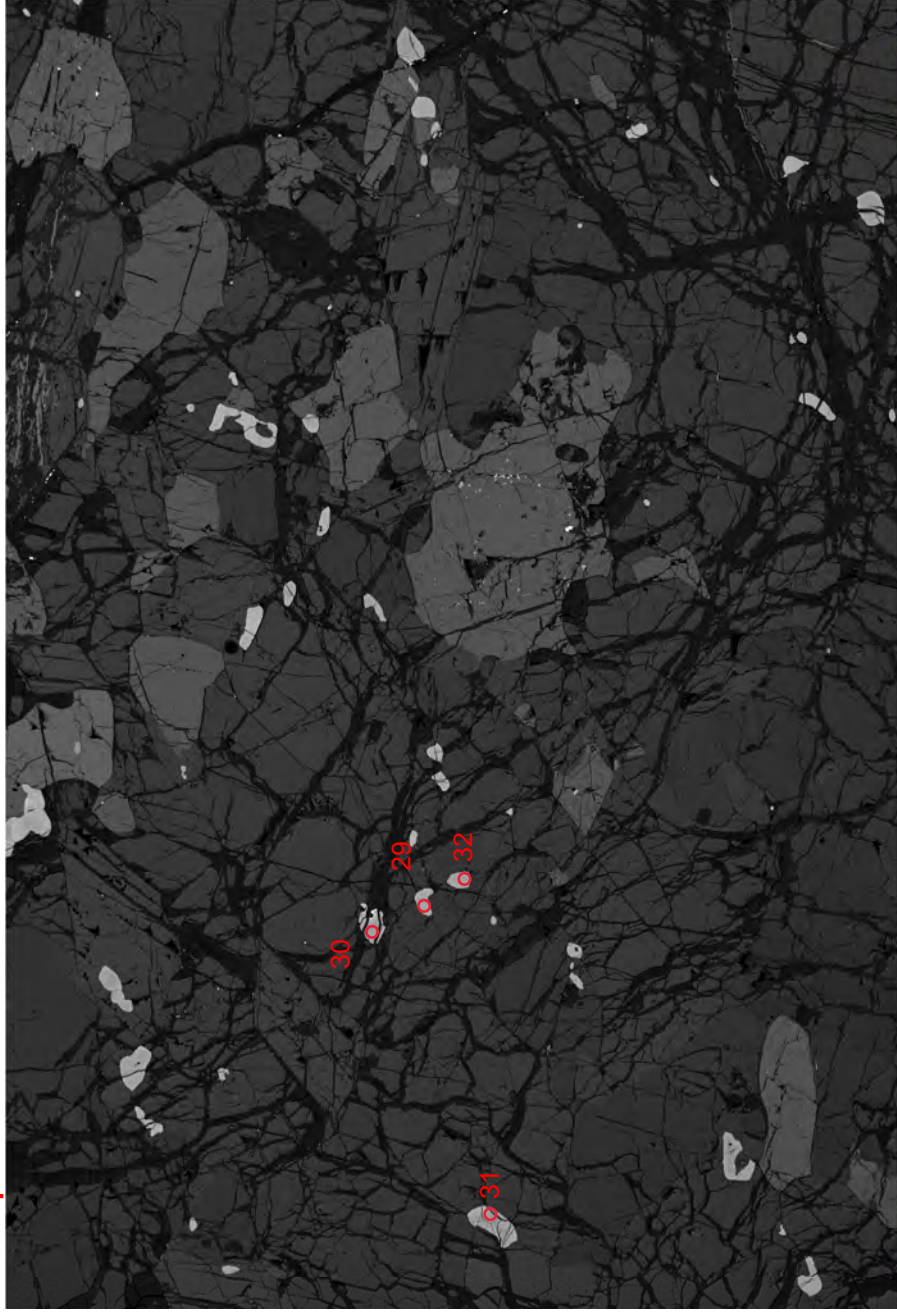

100 μm

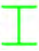

EHT = 10.00 kV  
WD = 8.5 mm

Signal A = HDBSD  
Mag = 32 X

Date : 5 Dec 2021  
Time : 14:04:36

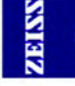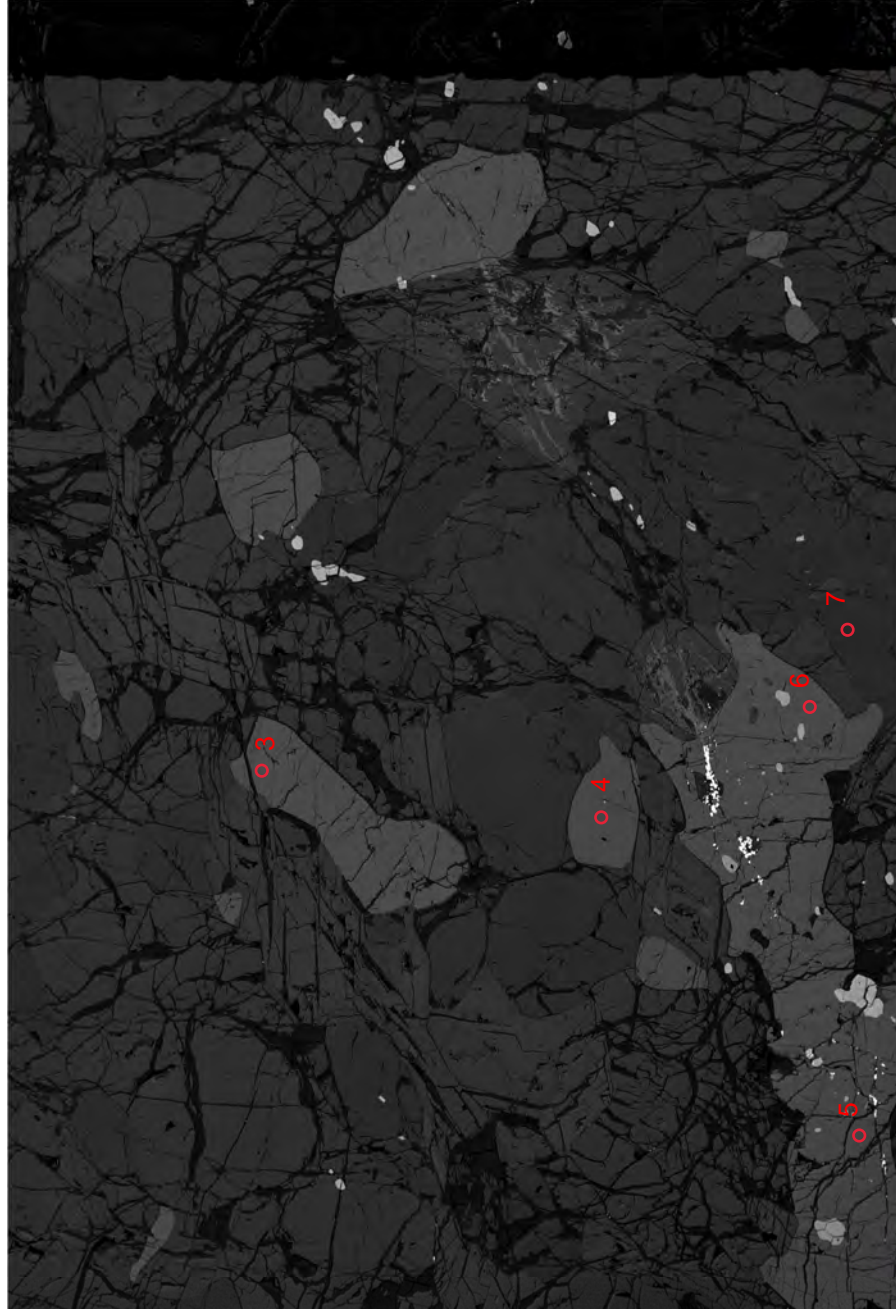

100 μm

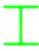

EHT = 10.00 kV  
WD = 8.5 mm

Signal A = HDBSD  
Mag = 32 X

Date : 5 Dec 2021  
Time : 14:08:12

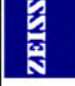



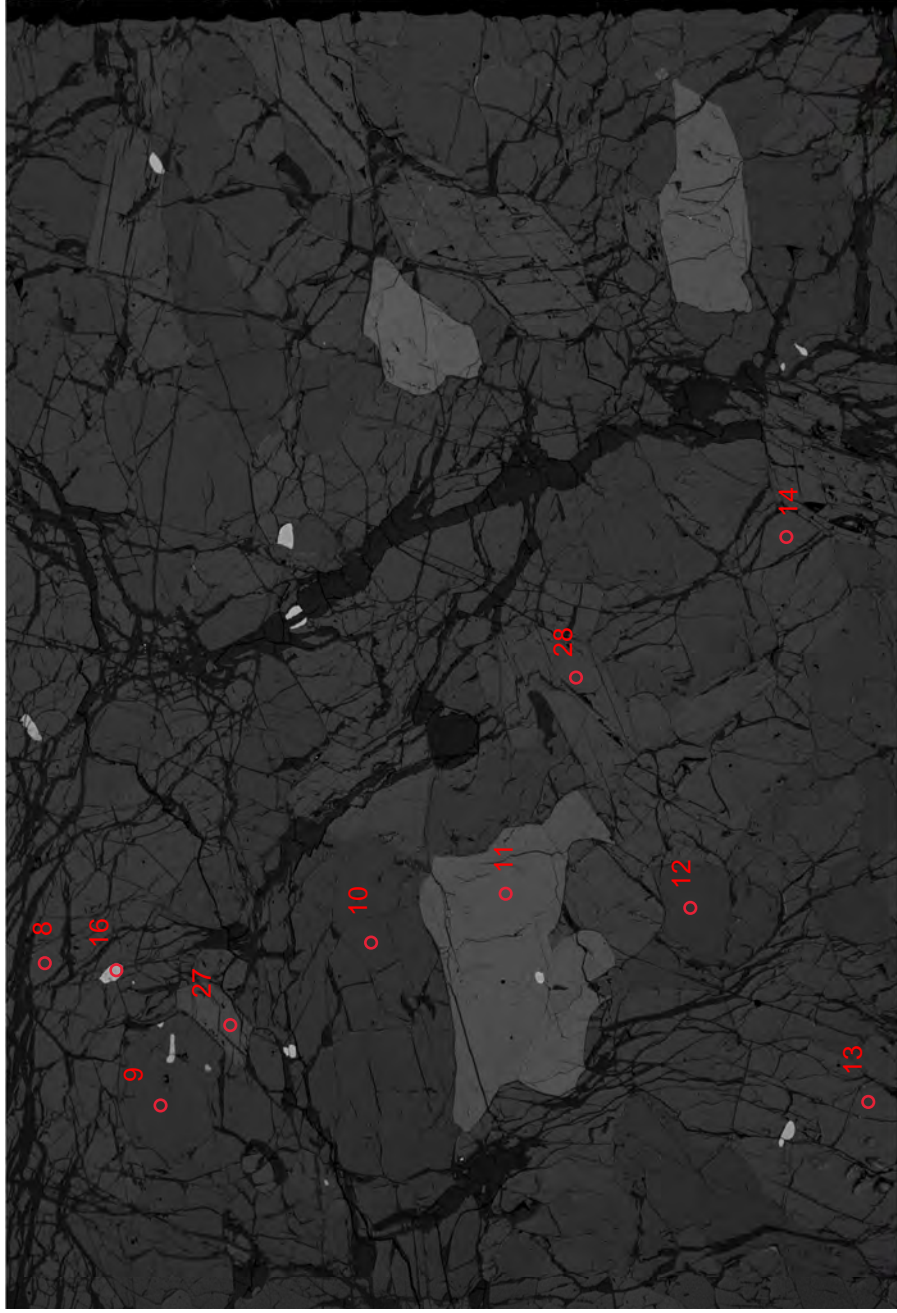

100  $\mu\text{m}$

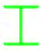

EHT = 10.00 kV  
WD = 8.5 mm

Signal A = HDBSD  
Mag = 32 X

Date : 5 Dec 2021  
Time : 14:11:48

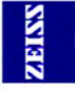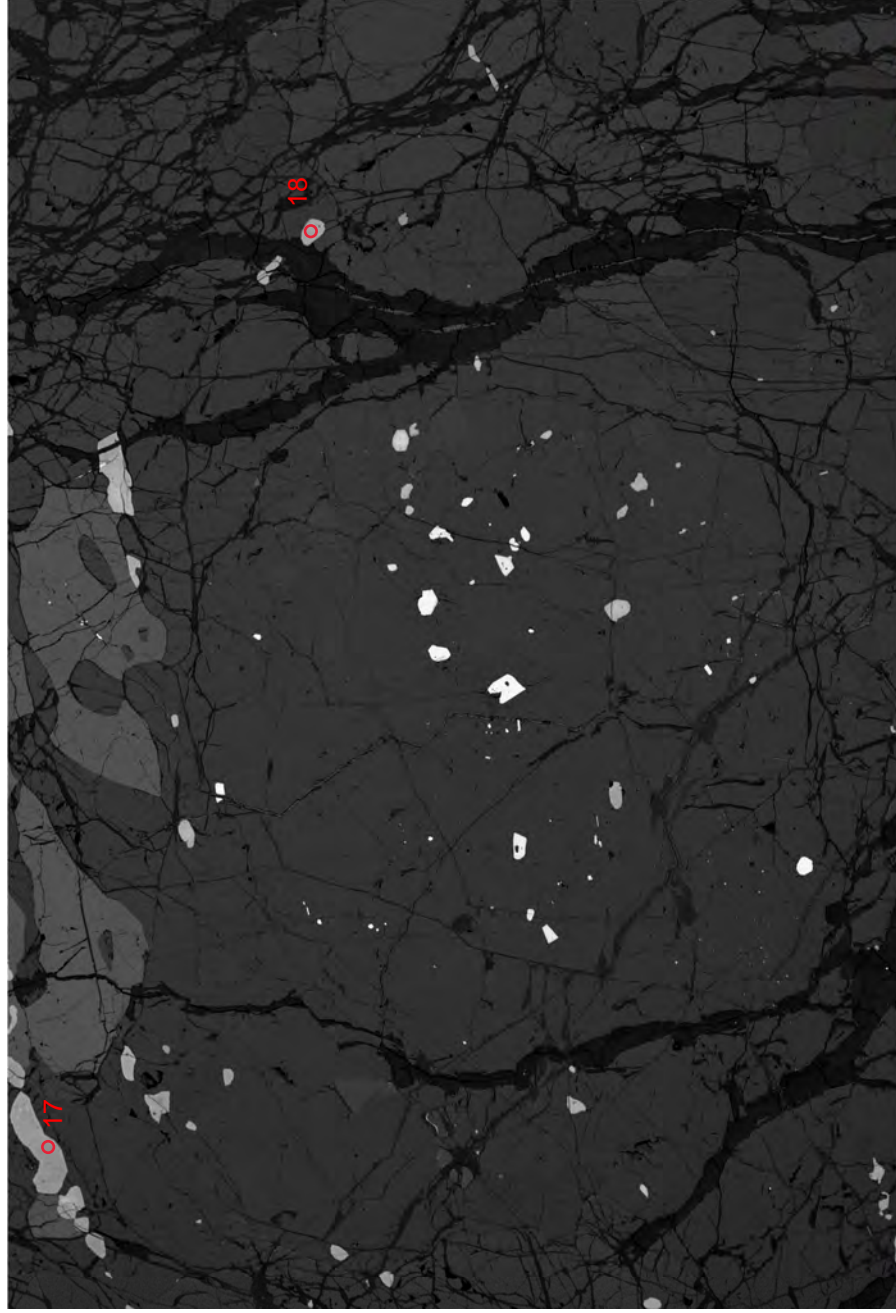

100  $\mu\text{m}$

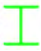

EHT = 10.00 kV  
WD = 8.5 mm

Signal A = HDBSD  
Mag = 32 X

Date : 5 Dec 2021  
Time : 14:41:52

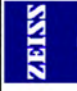

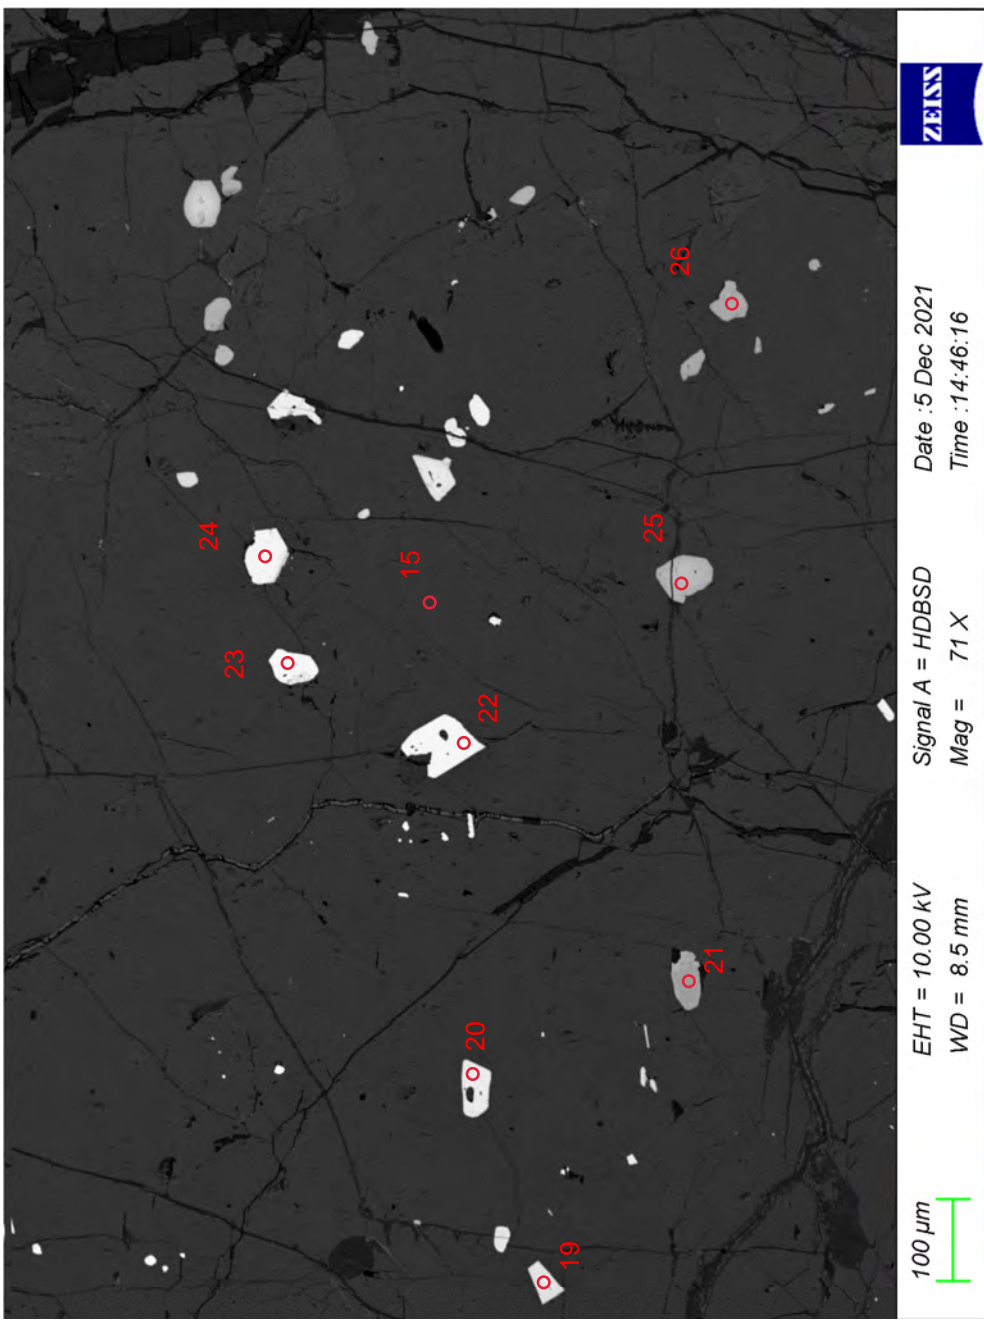



Sample C17-64

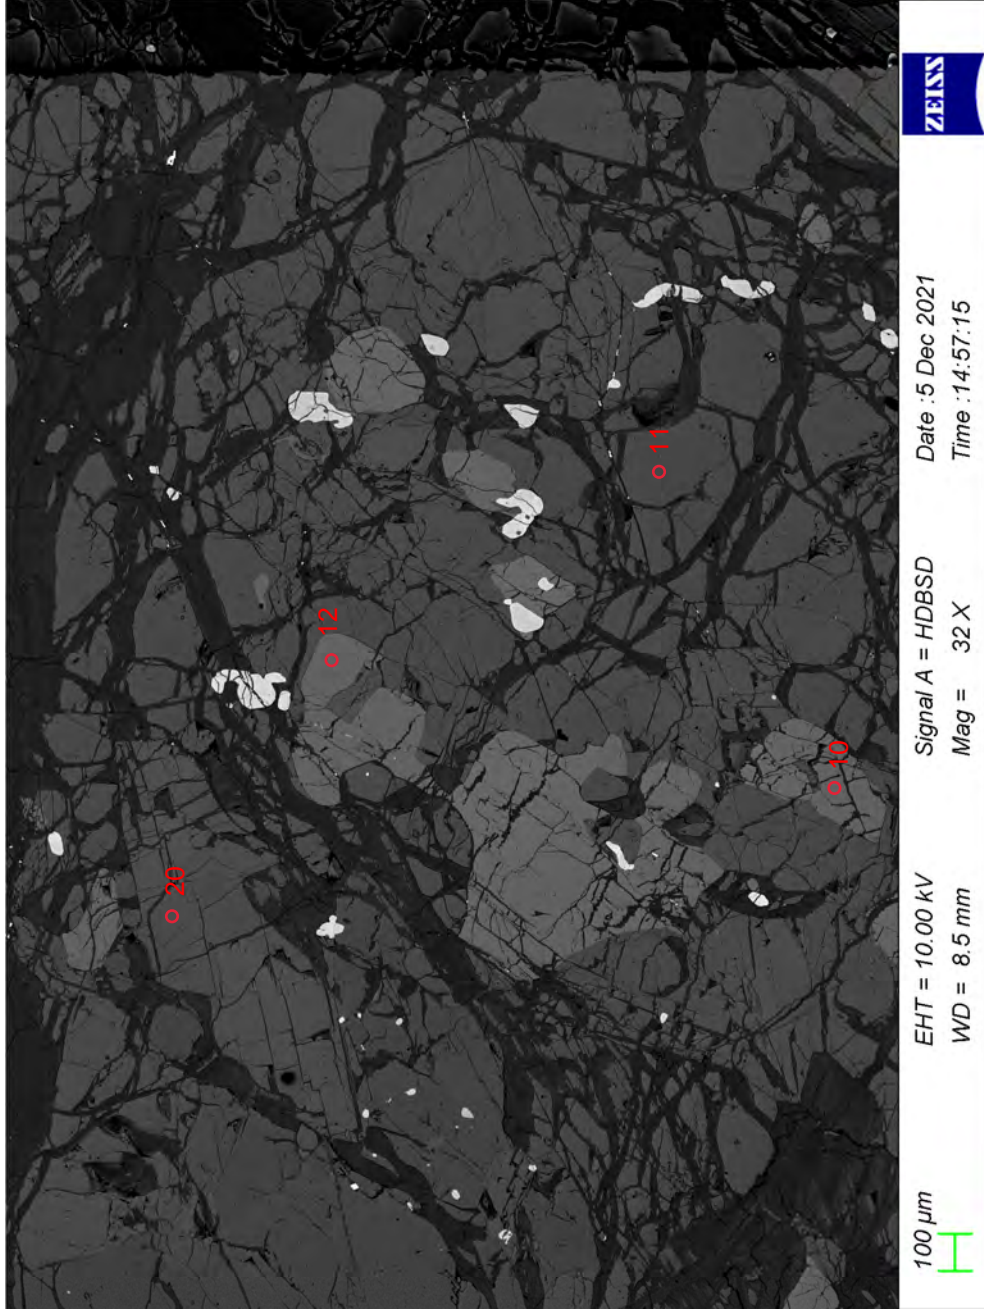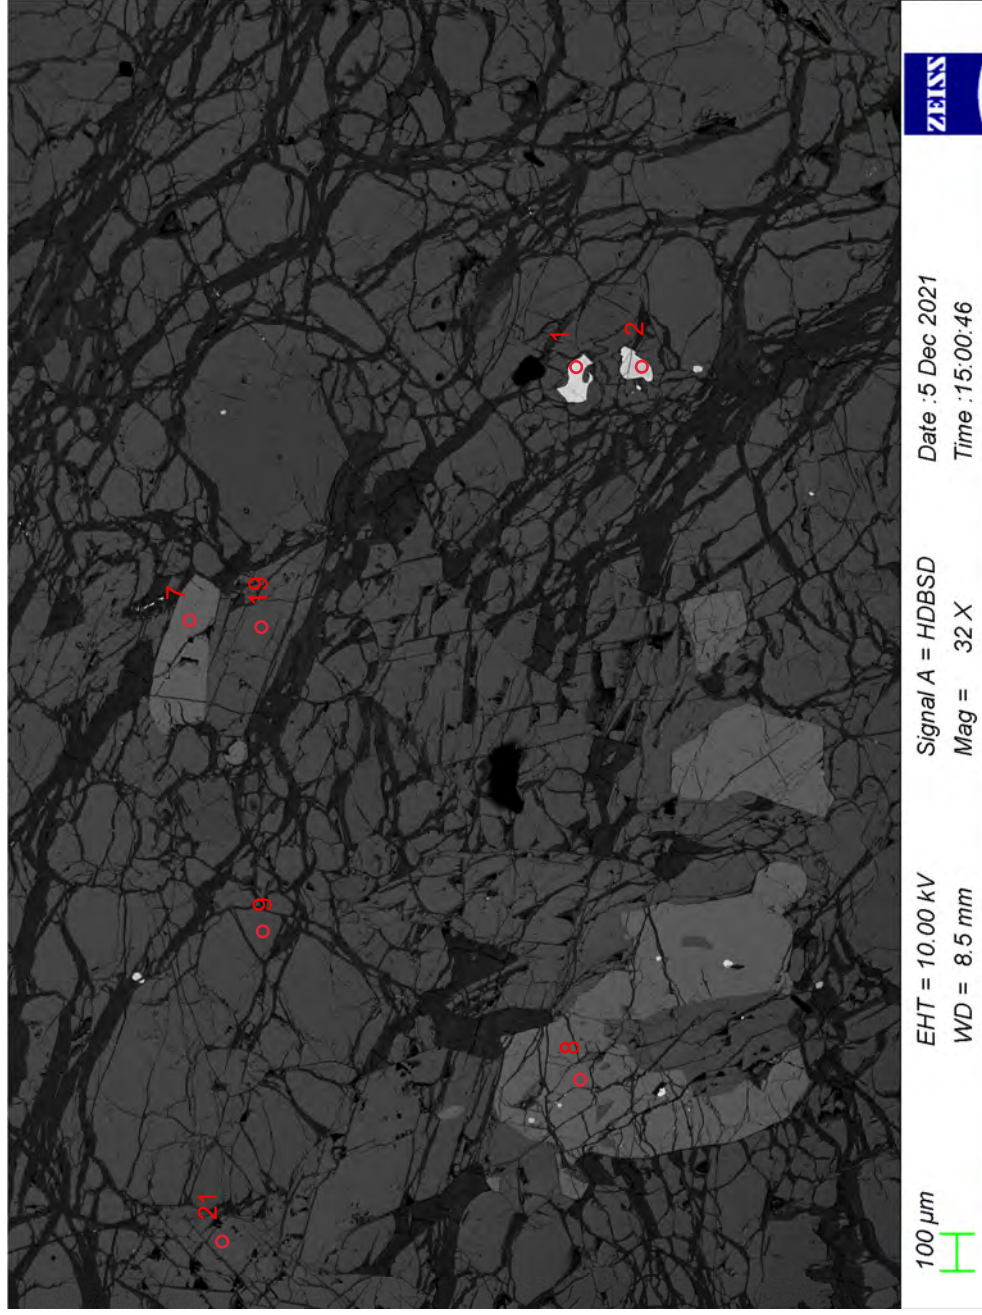



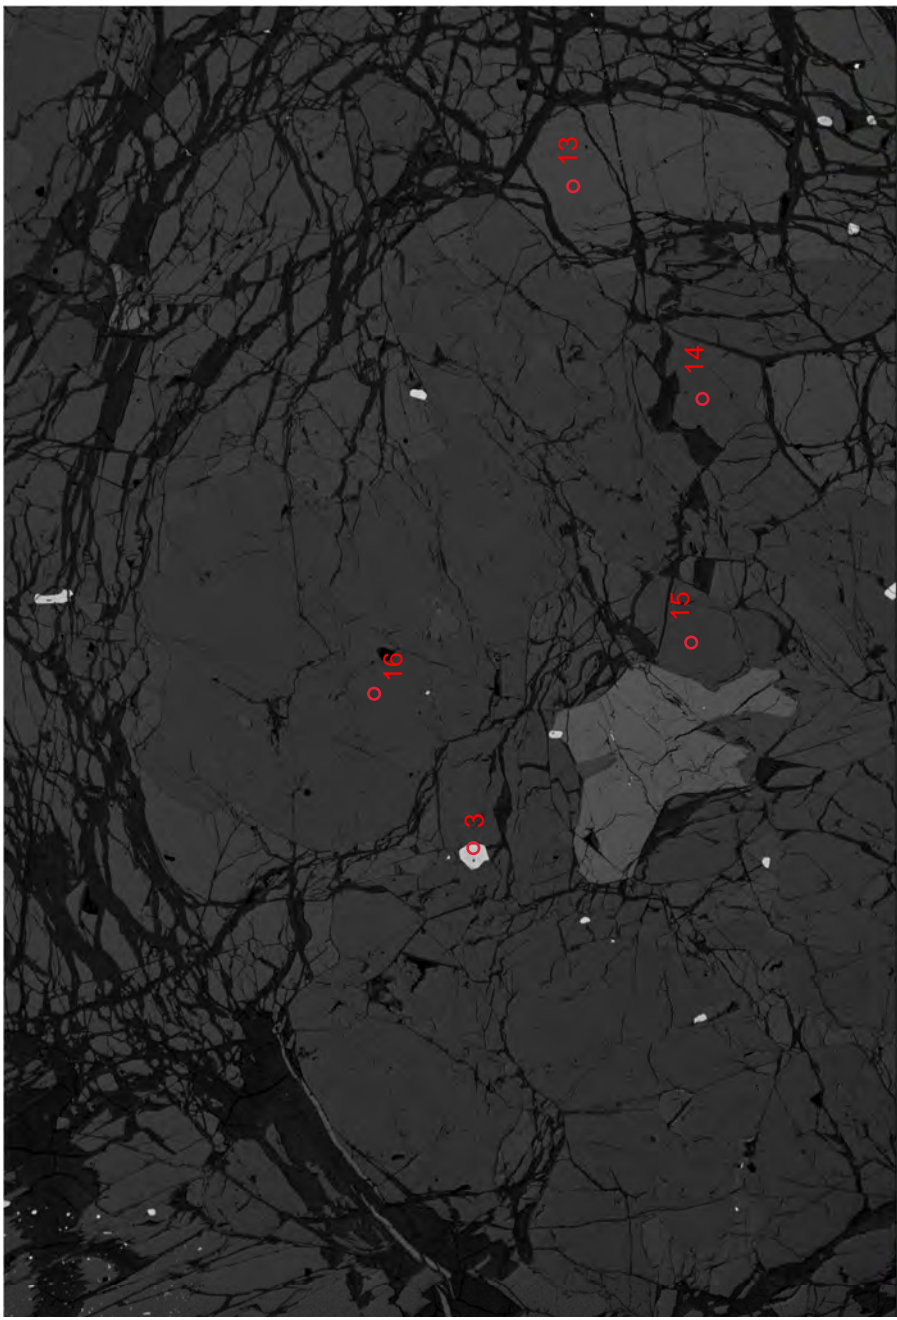

100 μm

EHT = 10.00 kV  
WD = 8.5 mm

Signal A = HDBSD  
Mag = 32 X

Date : 5 Dec 2021  
Time : 15:04:07

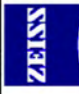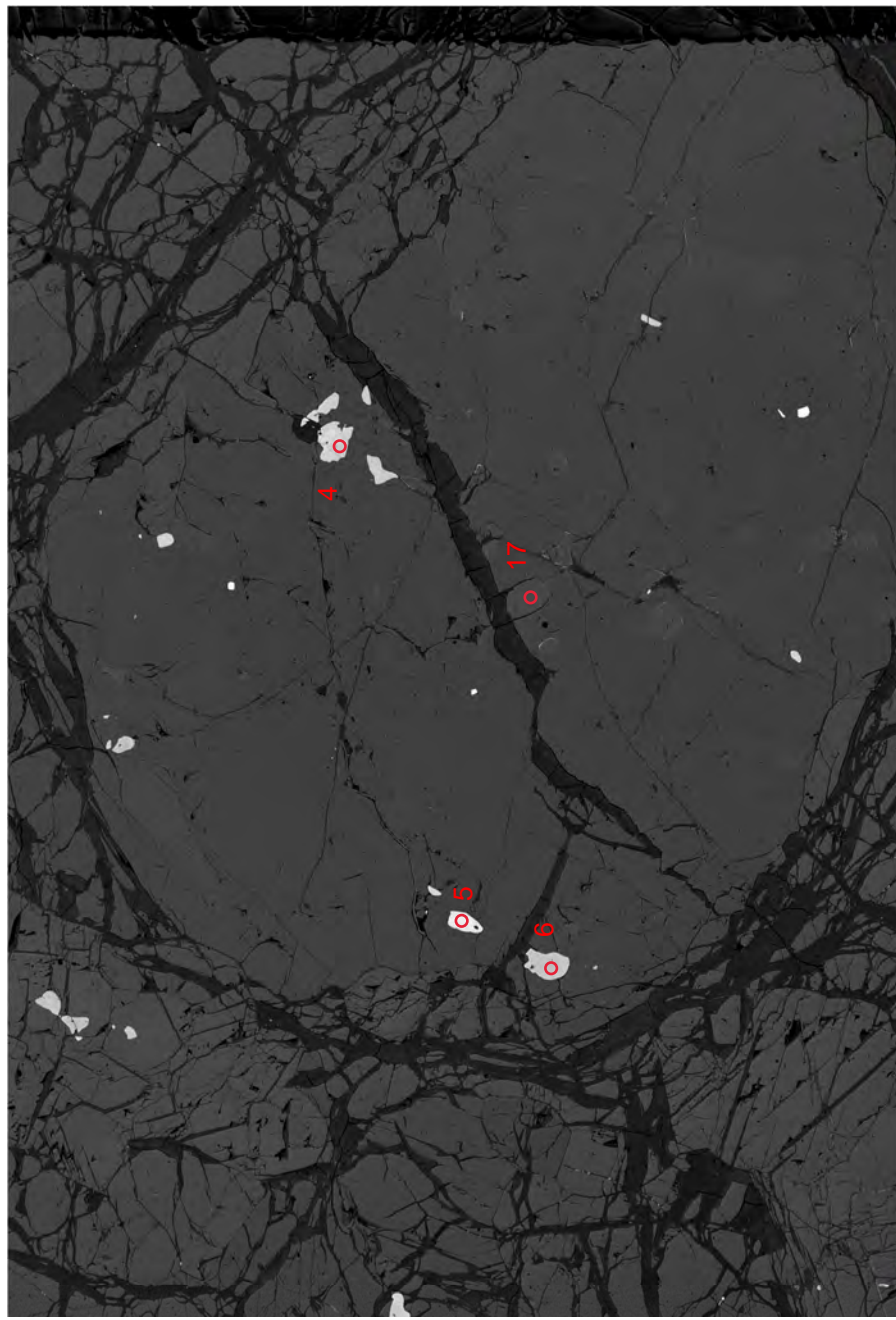

100 μm

EHT = 10.00 kV  
WD = 8.5 mm

Signal A = HDBSD  
Mag = 32 X

Date : 5 Dec 2021  
Time : 15:28:59

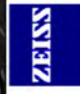

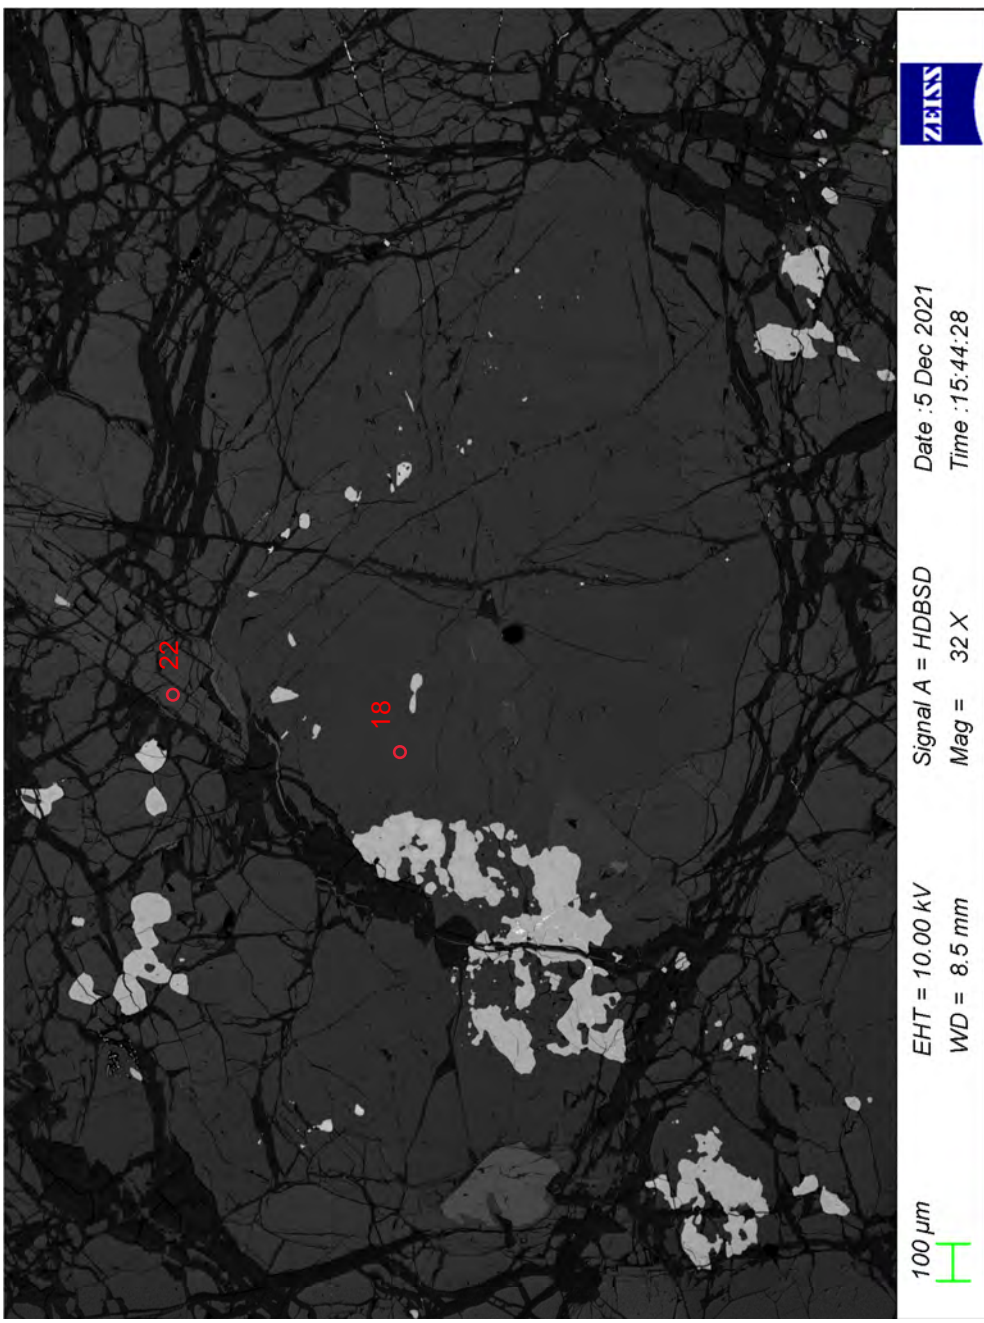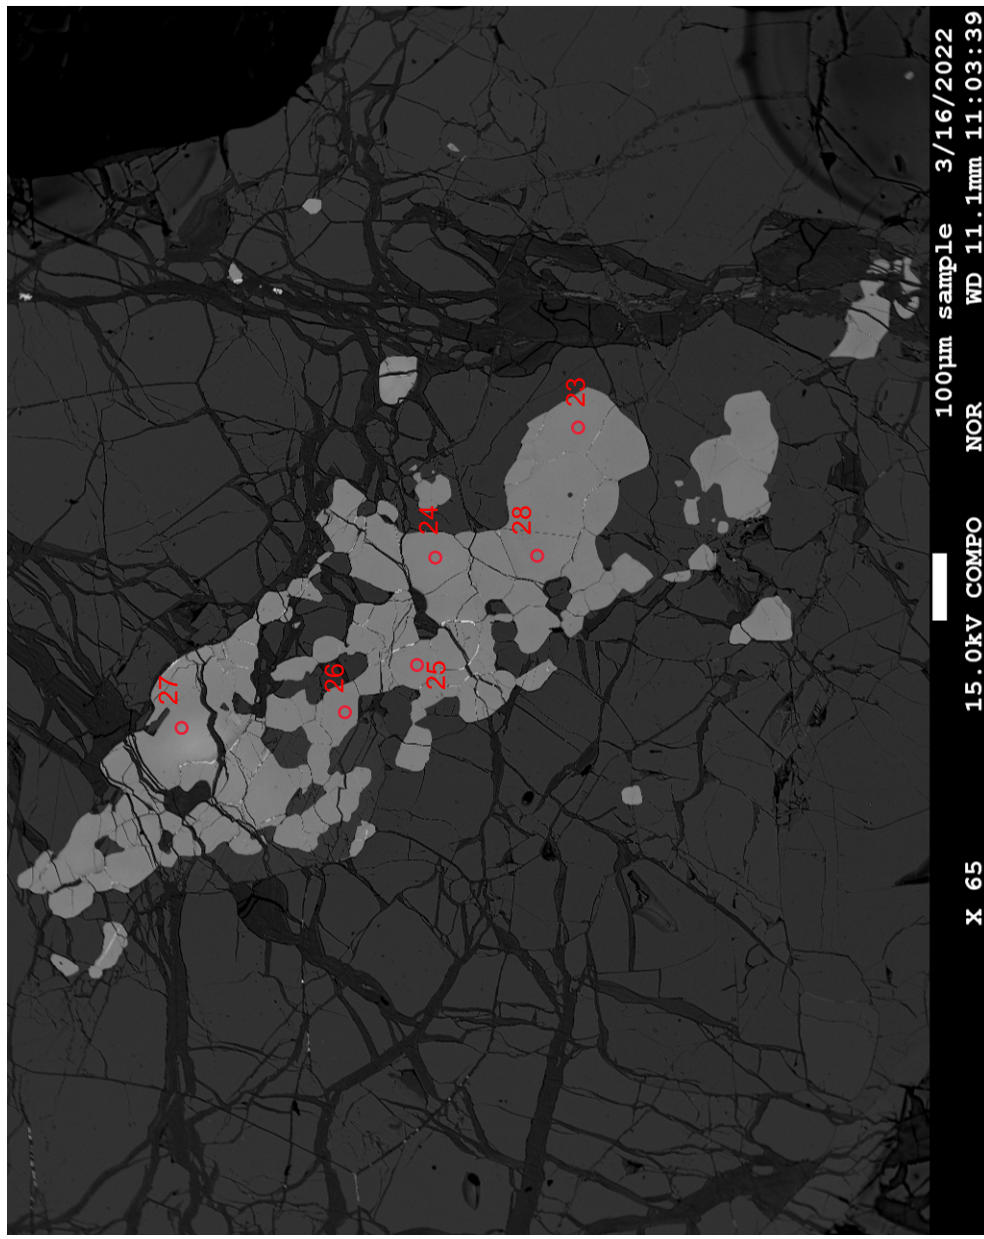



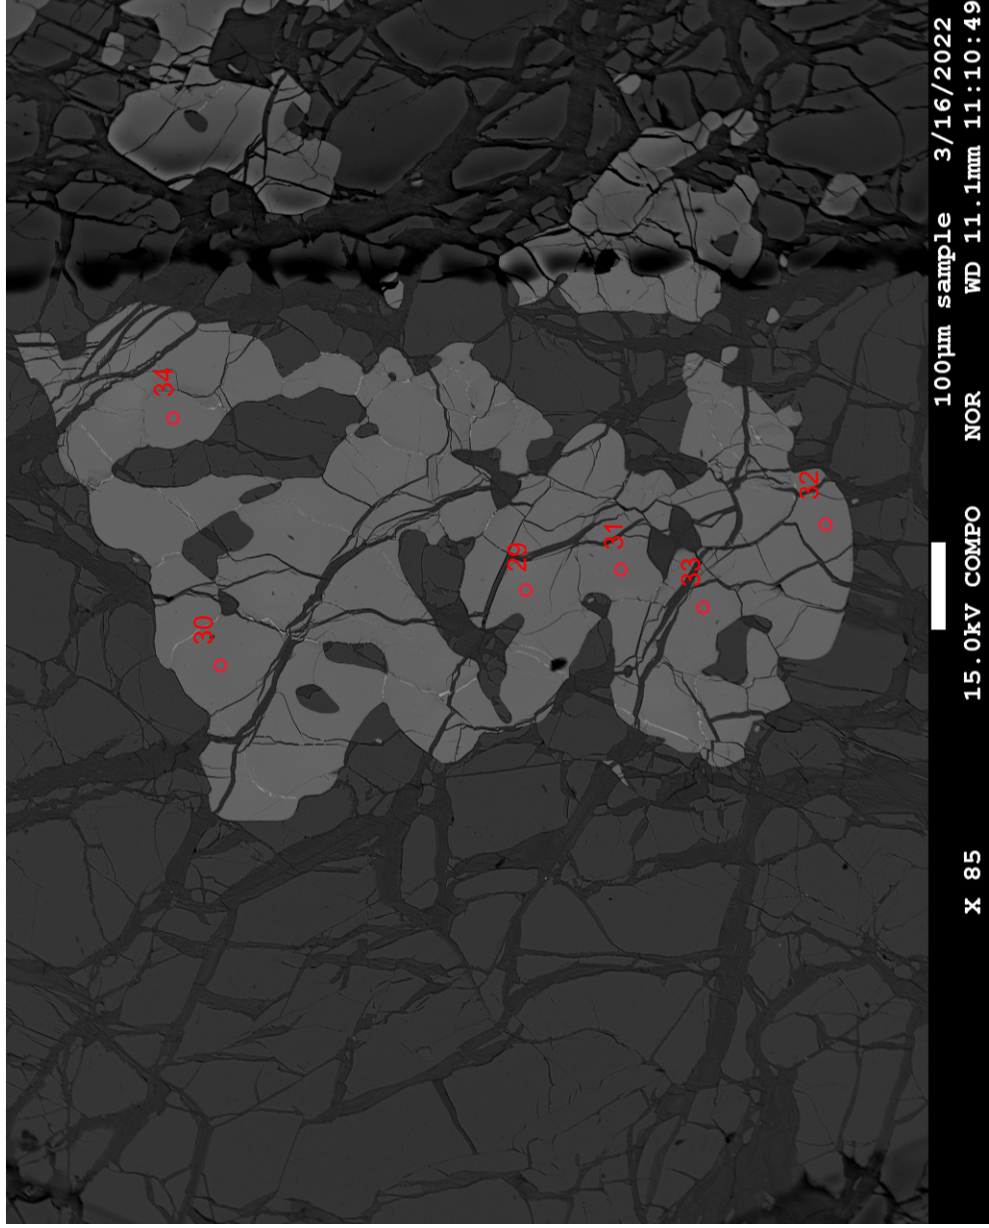



Sample C17-68

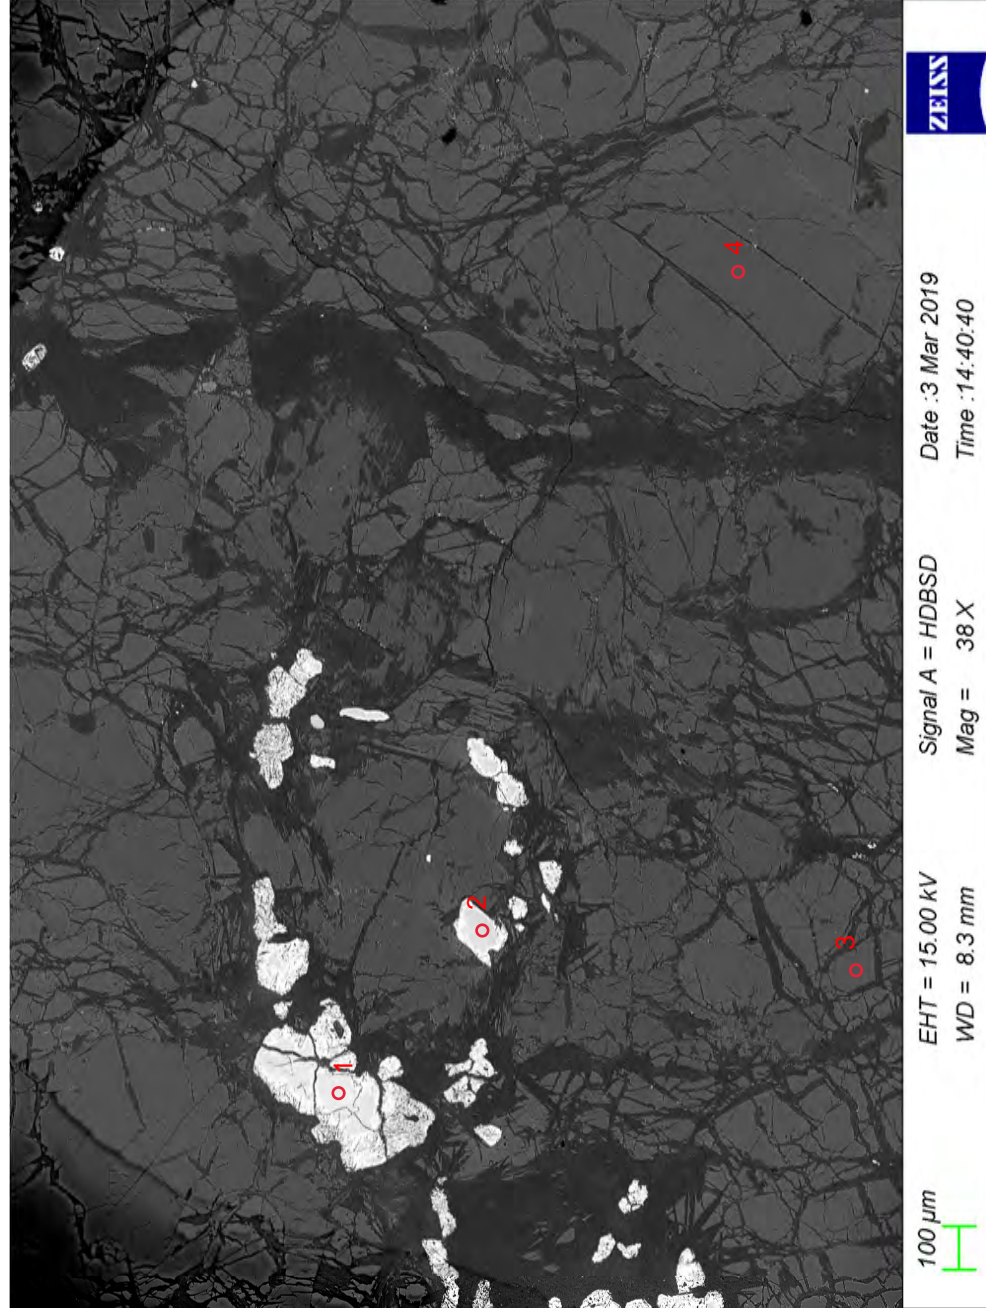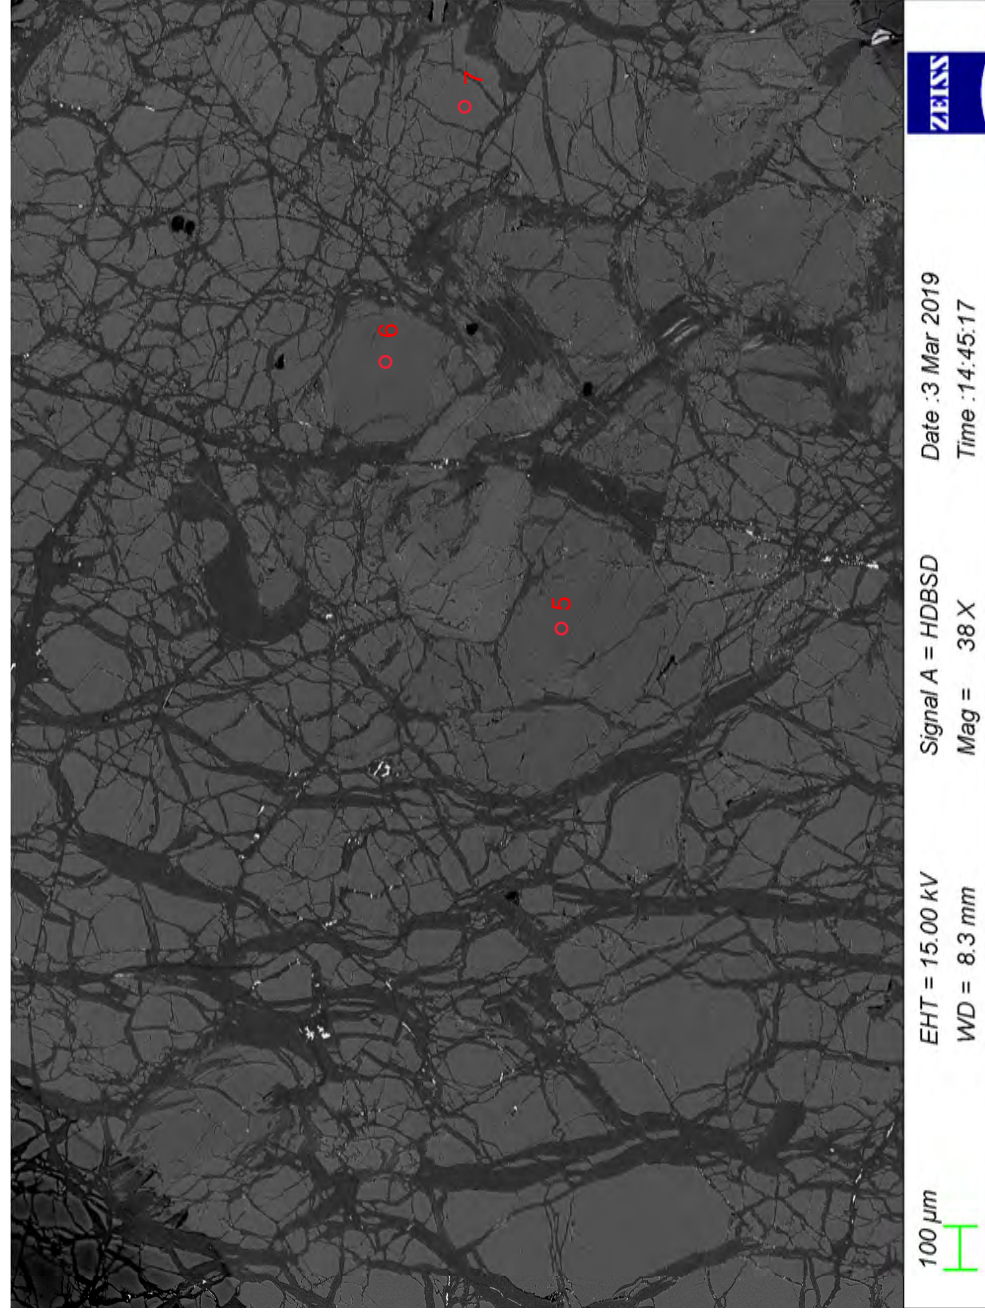



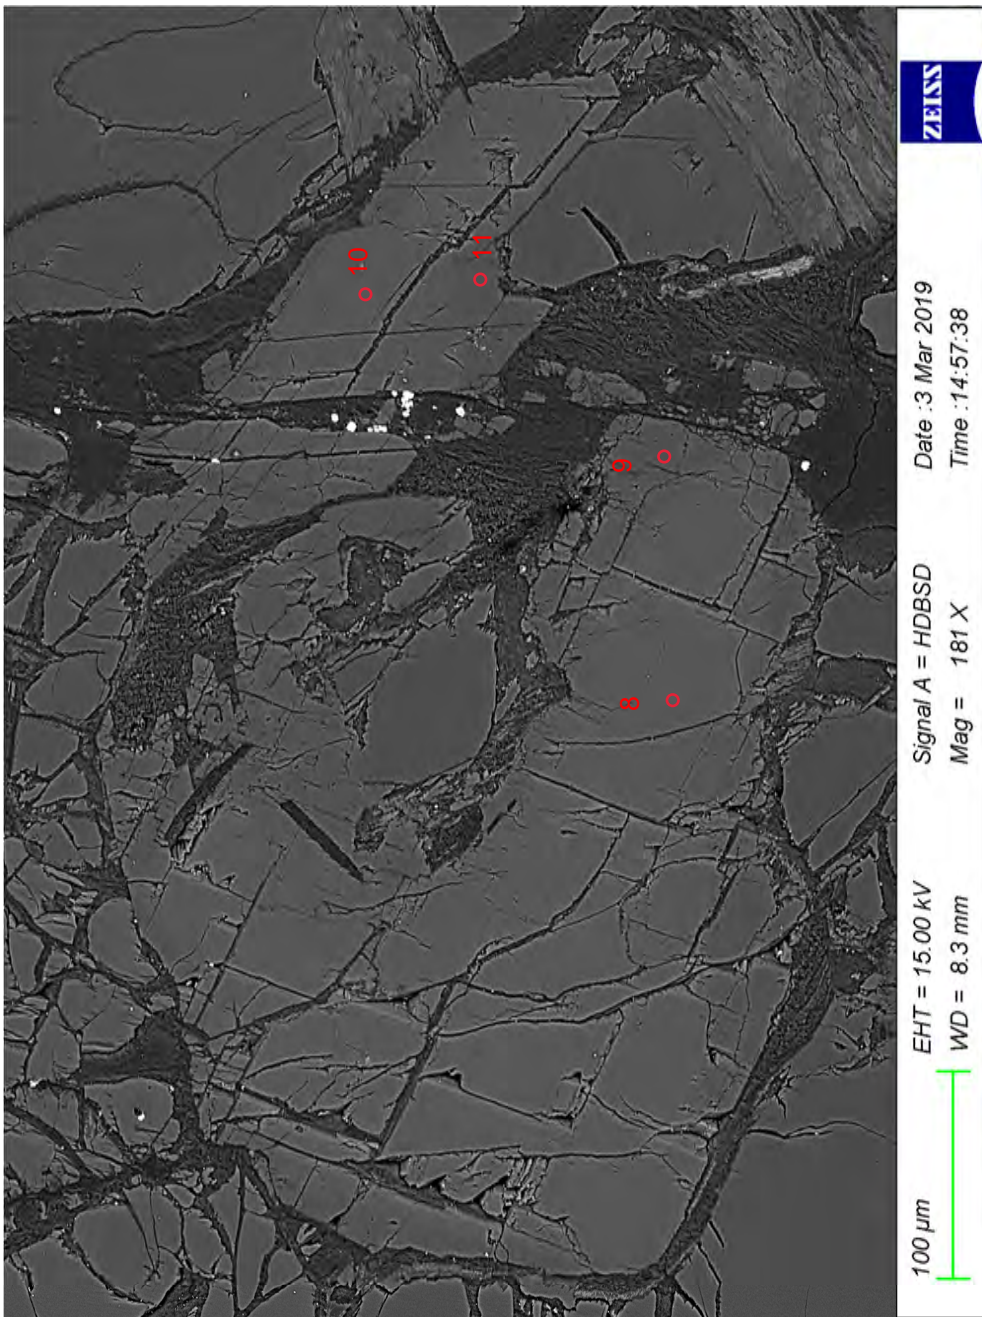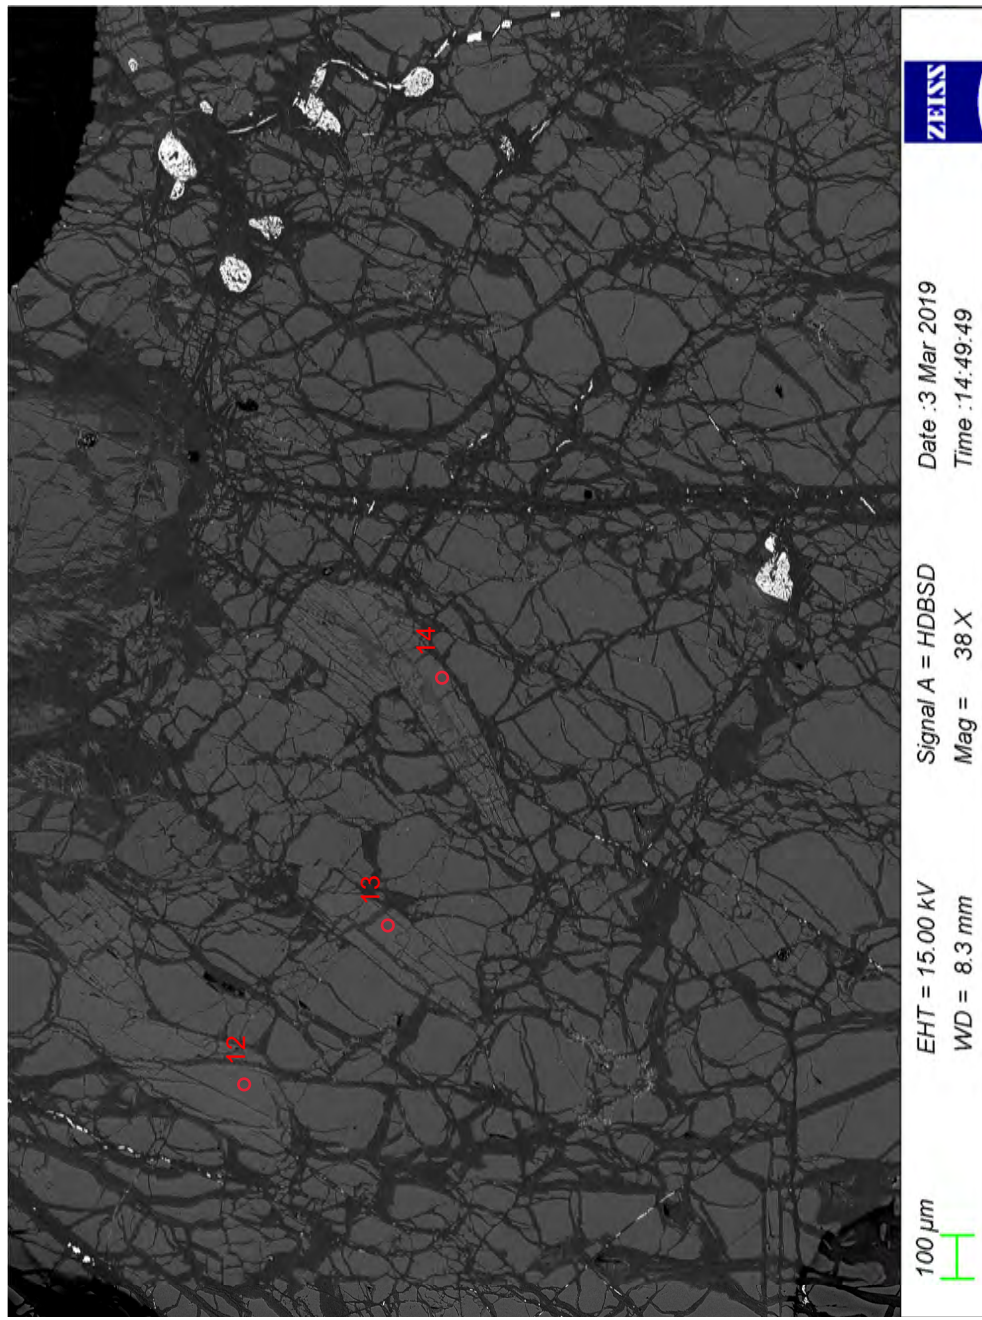



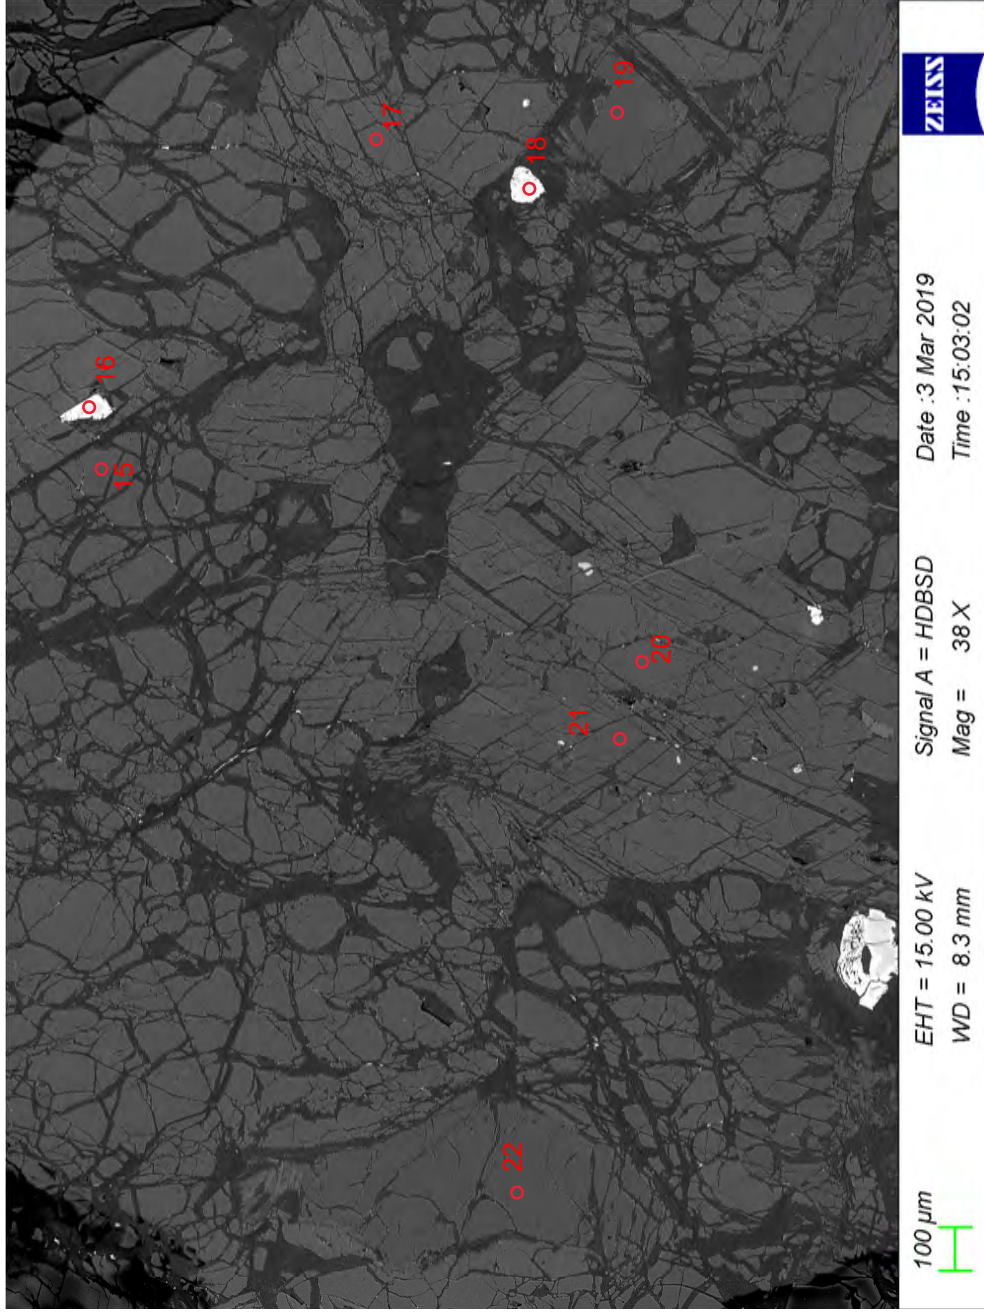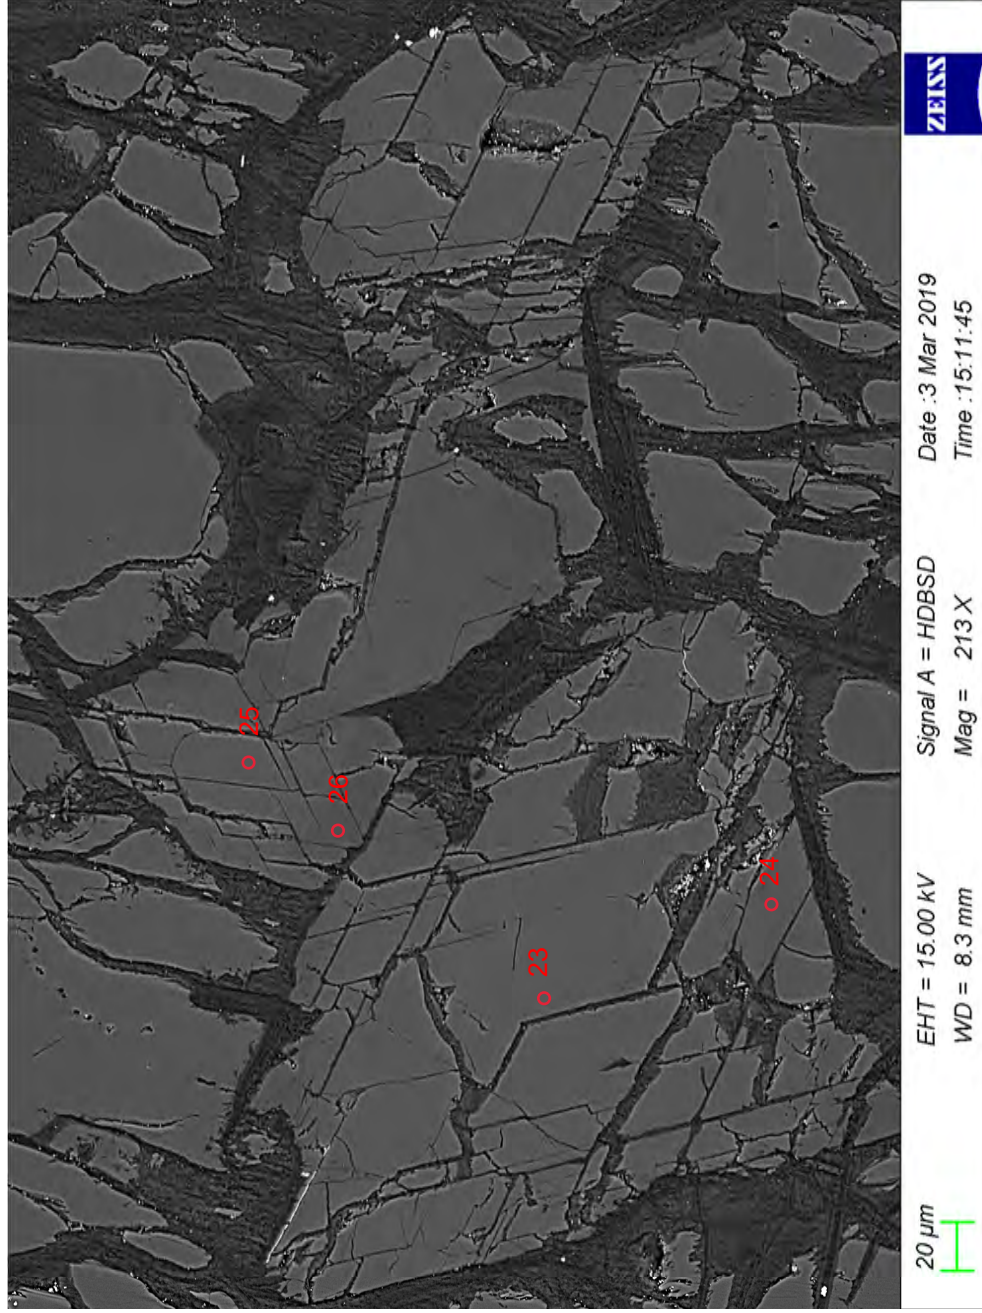



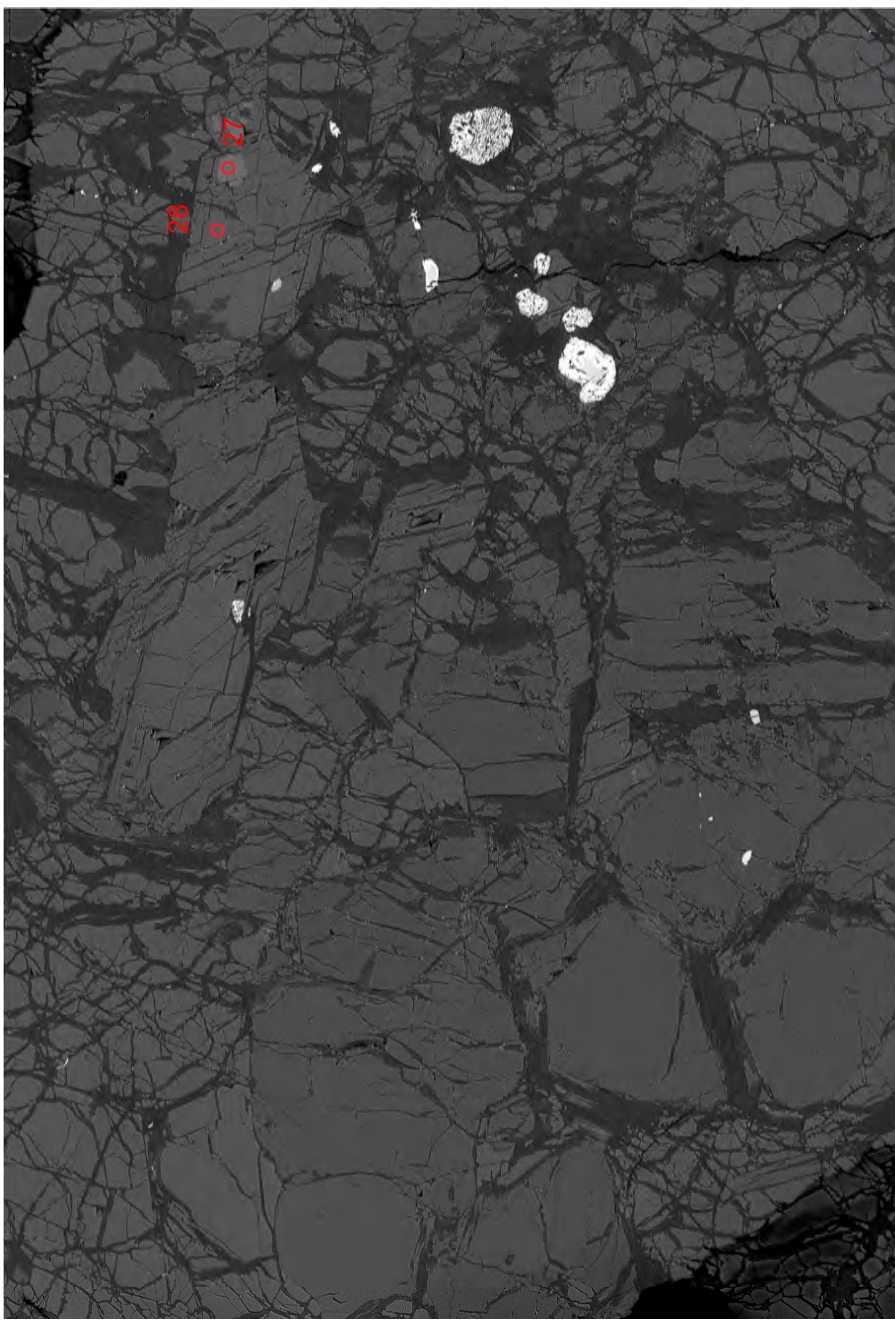

100  $\mu\text{m}$

EHT = 15.00 kV  
WD = 8.3 mm

Signal A = HDBSD  
Mag = 39 X

Date : 3 Mar 2019  
Time : 15:19:20

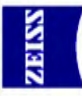



Sample C17-72

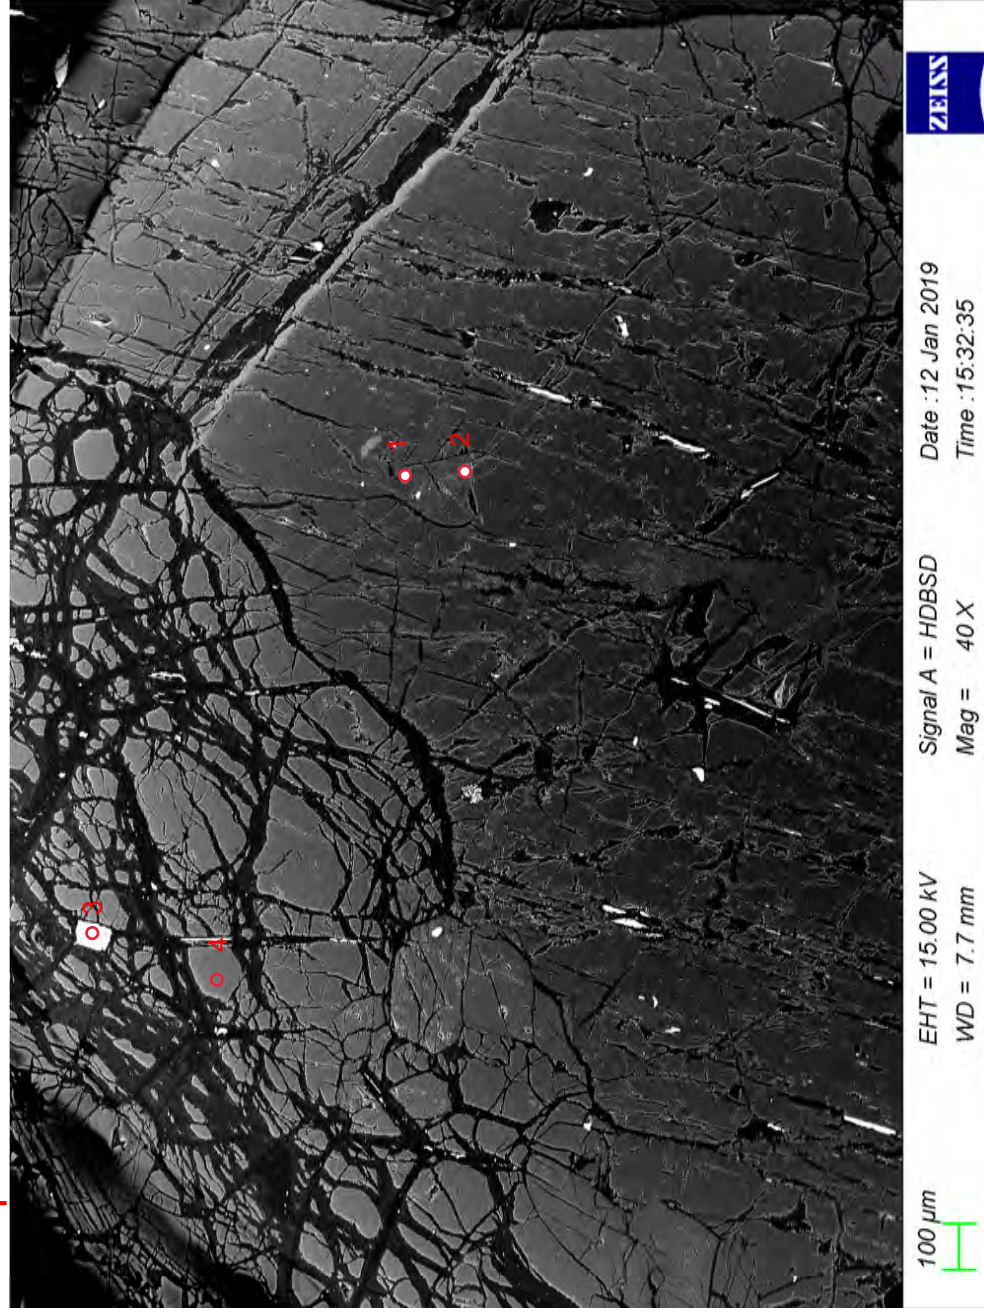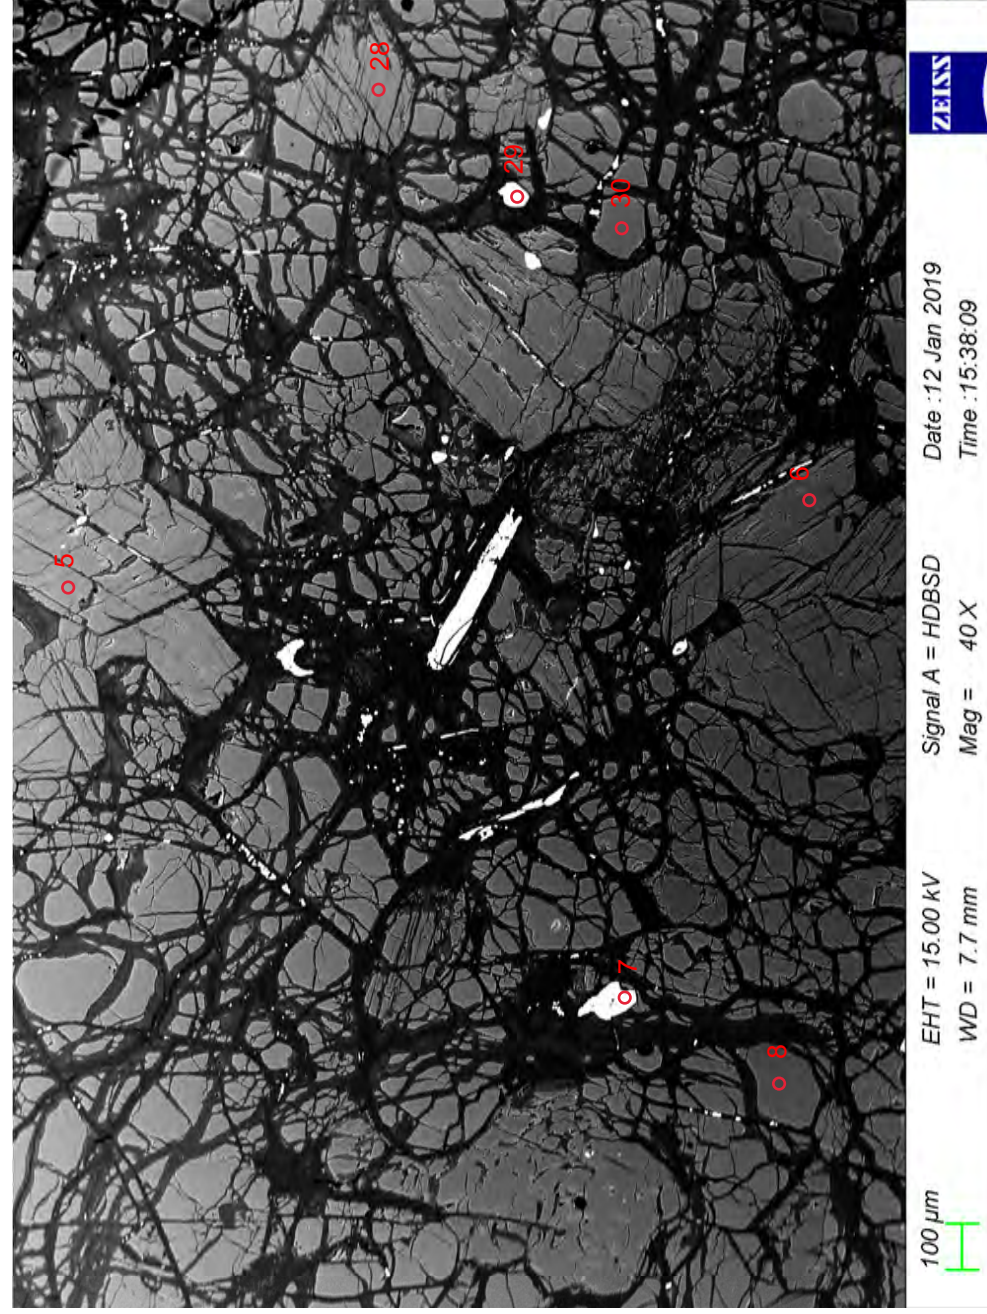



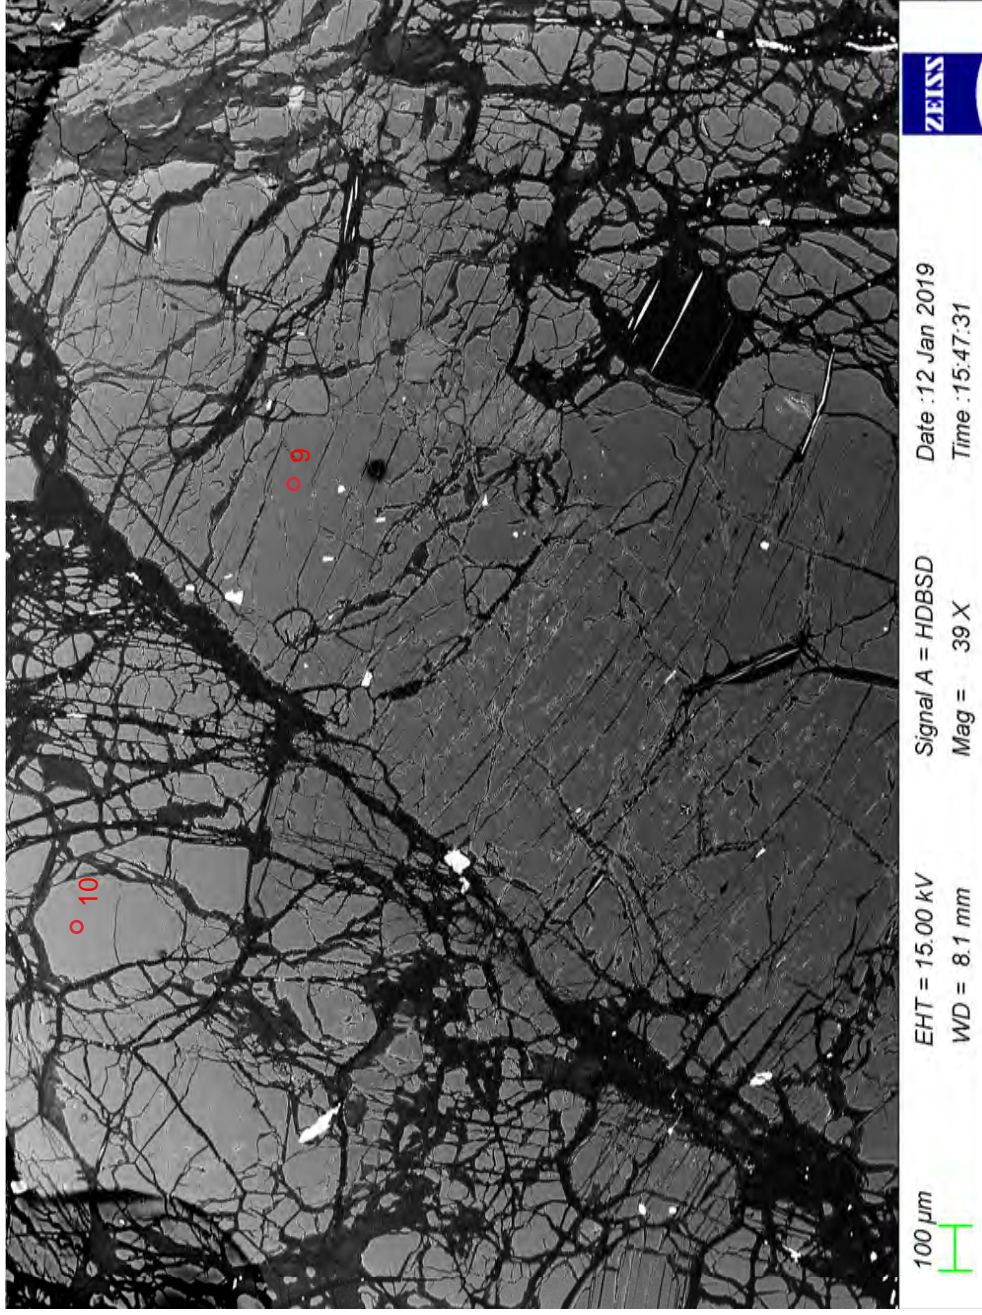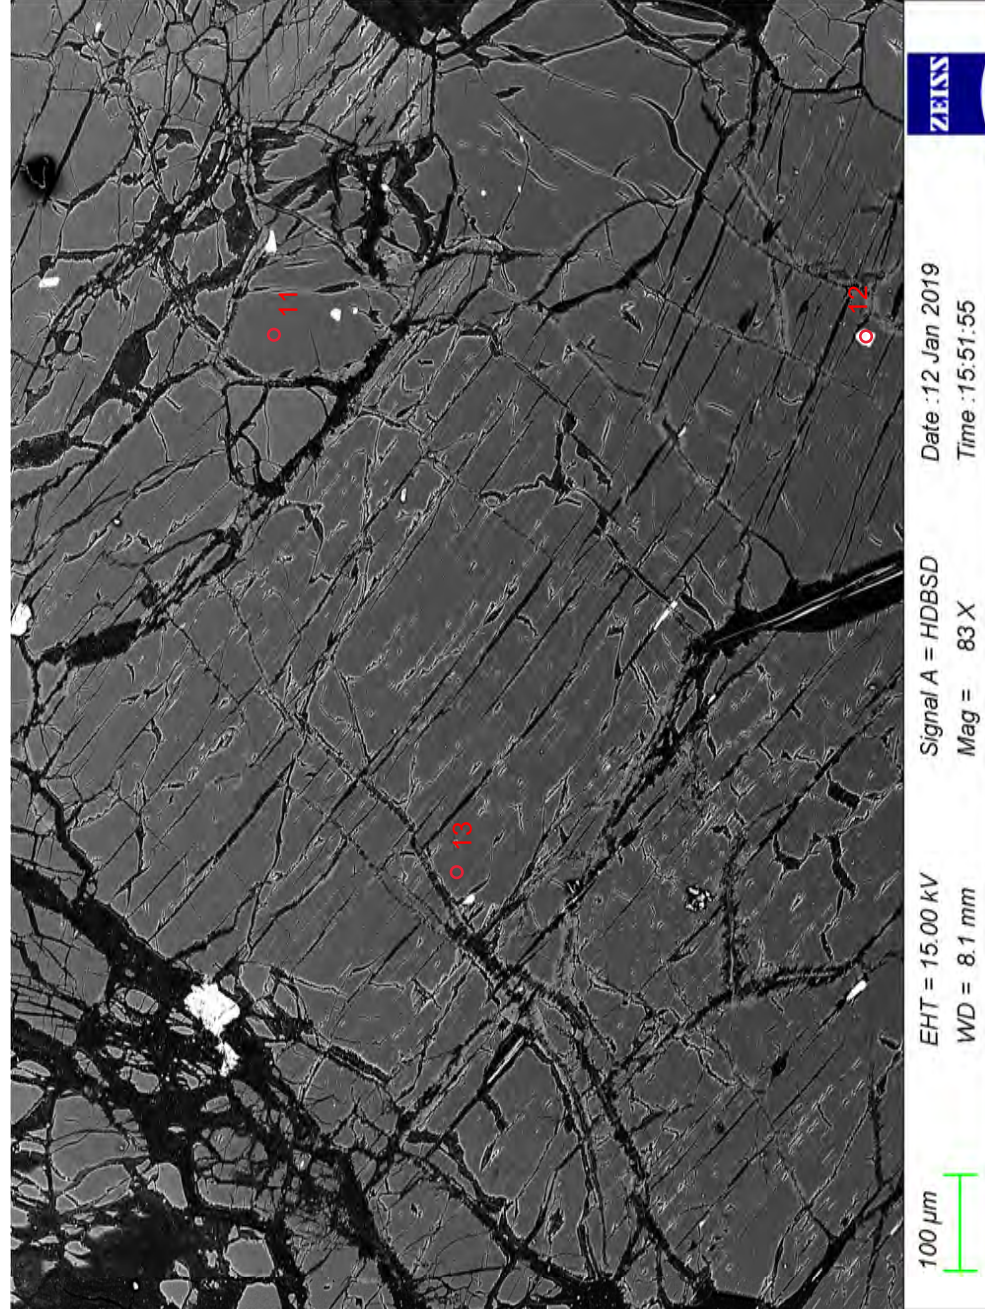



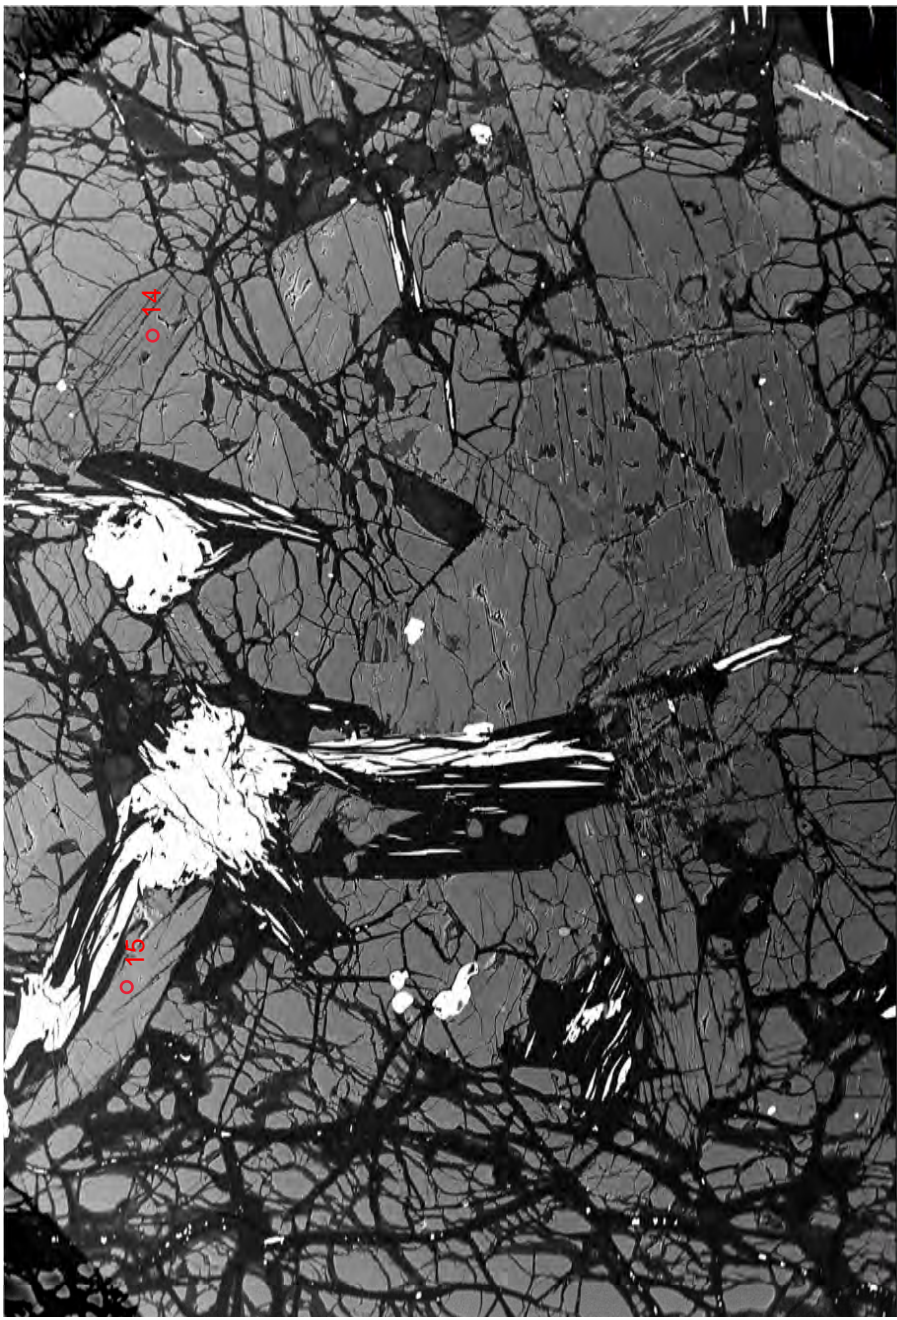

100  $\mu\text{m}$

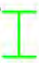

EHT = 15.00 kV  
WD = 8.1 mm

Signal A = HDBSD  
Mag = 39 X

Date :12 Jan 2019  
Time :15:57:19

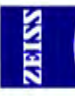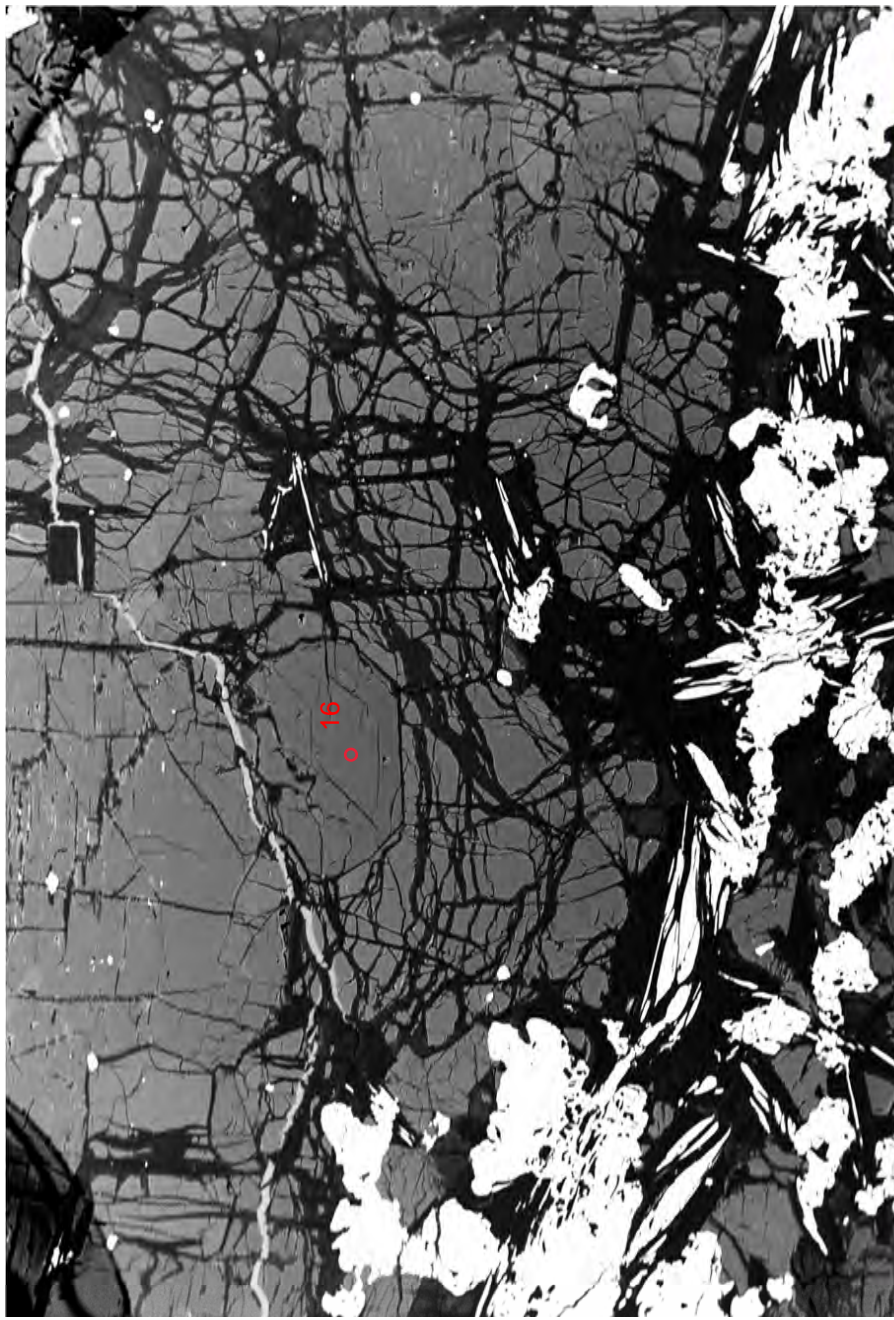

100  $\mu\text{m}$

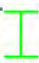

EHT = 15.00 kV  
WD = 8.0 mm

Signal A = HDBSD  
Mag = 39 X

Date :12 Jan 2019  
Time :16:03:55

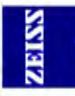



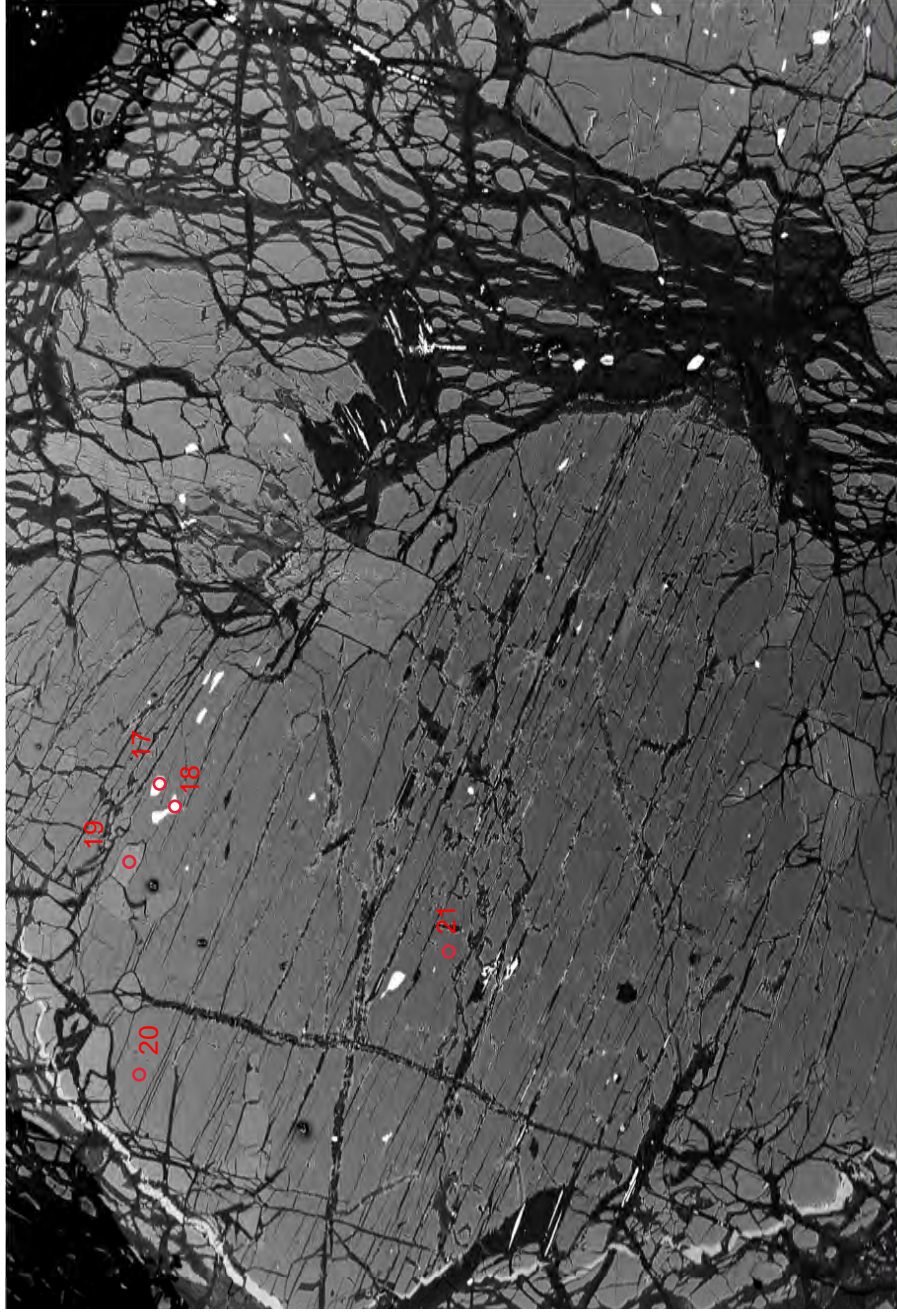

100 µm

EHT = 15.00 kV  
WD = 8.5 mm

Signal A = HDBSD  
Mag = 38 X

Date :12 Jan 2019  
Time :16:10:02

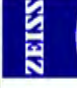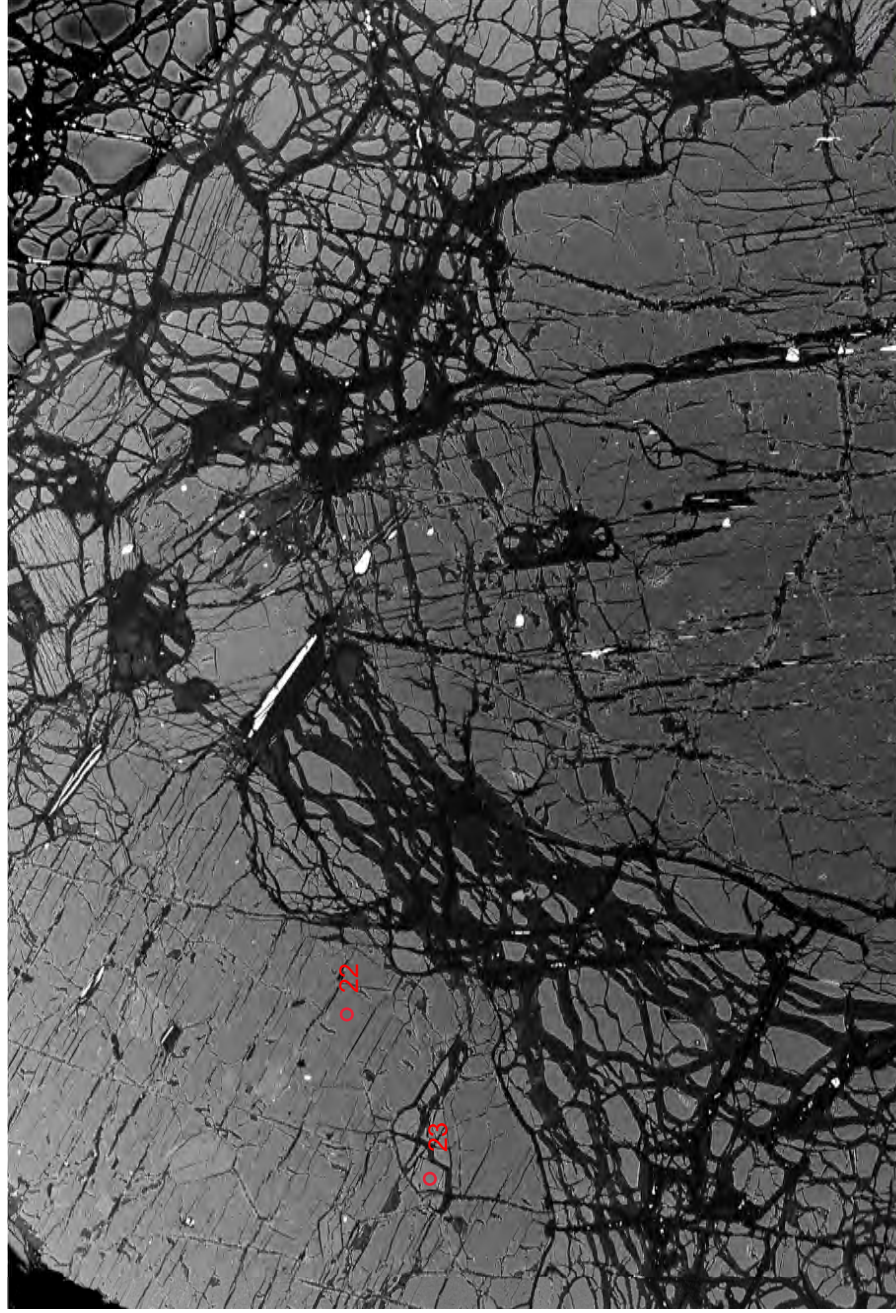

100 µm

EHT = 15.00 kV  
WD = 8.5 mm

Signal A = HDBSD  
Mag = 38 X

Date :12 Jan 2019  
Time :16:19:33

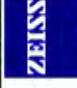



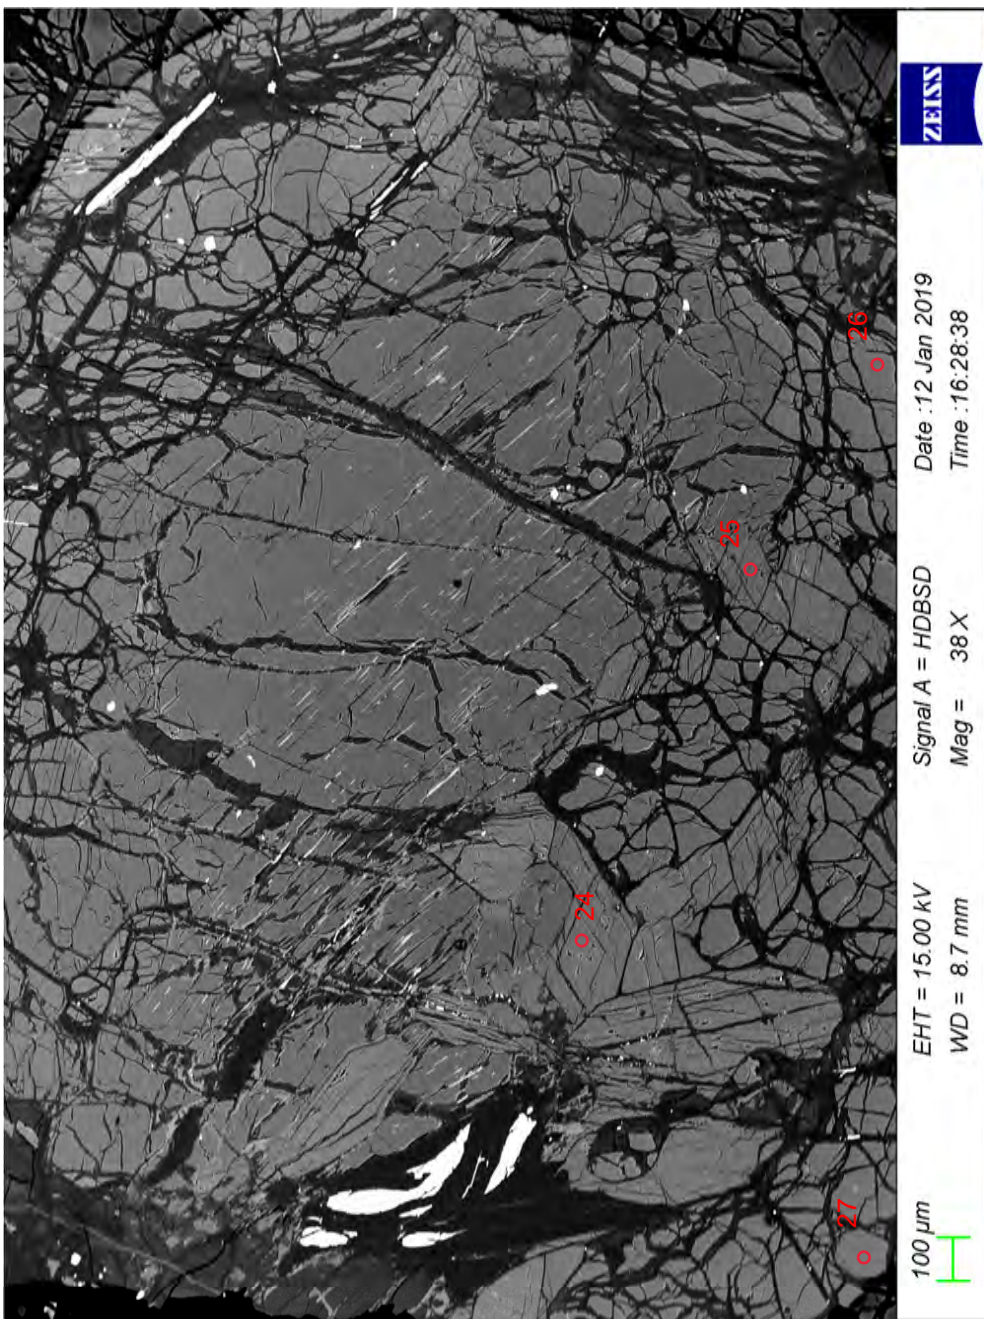

○



Sample C19-52

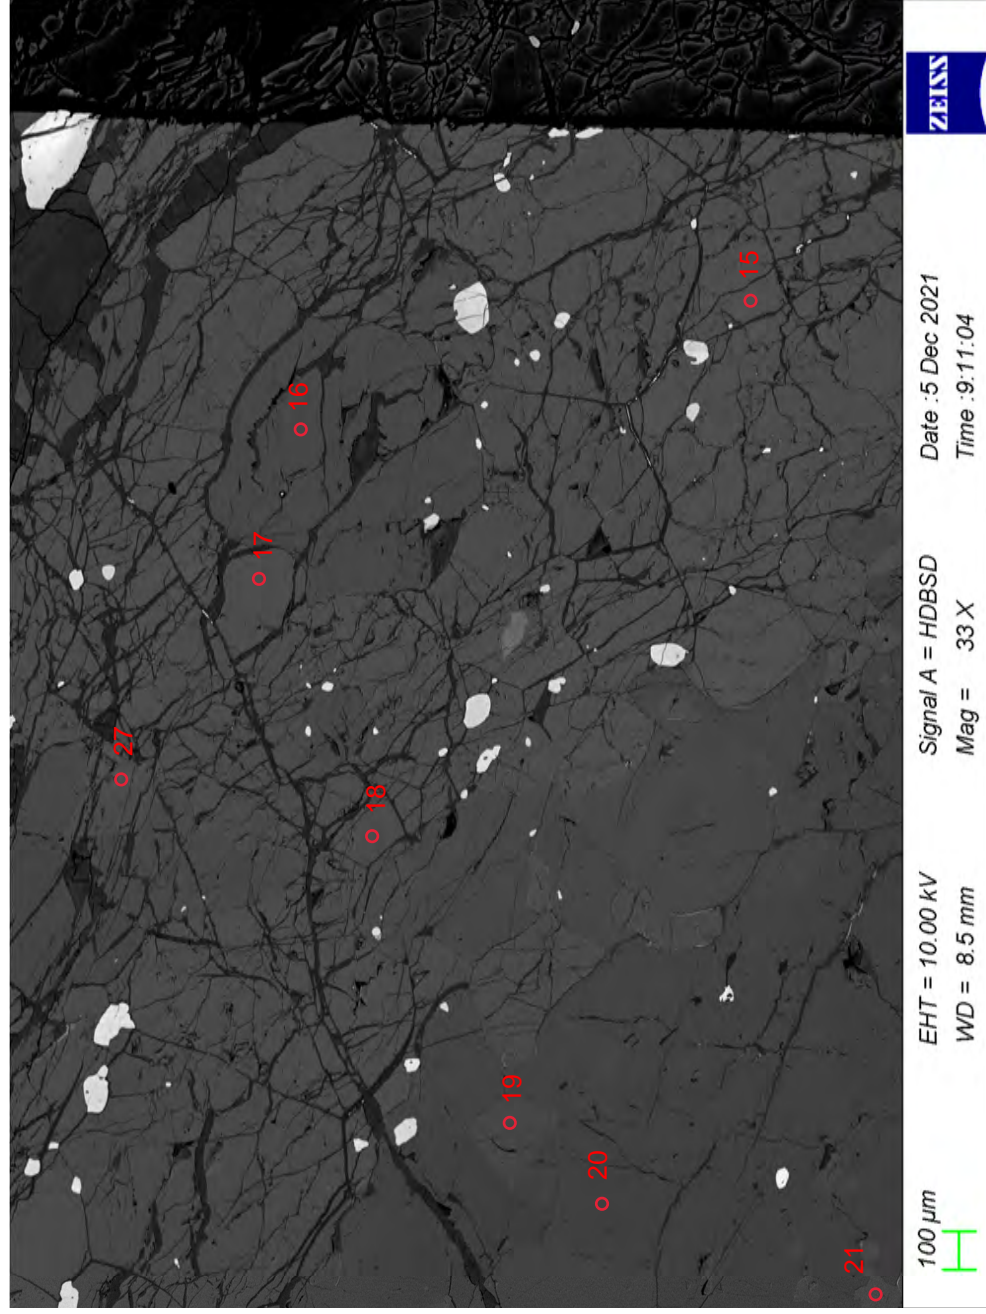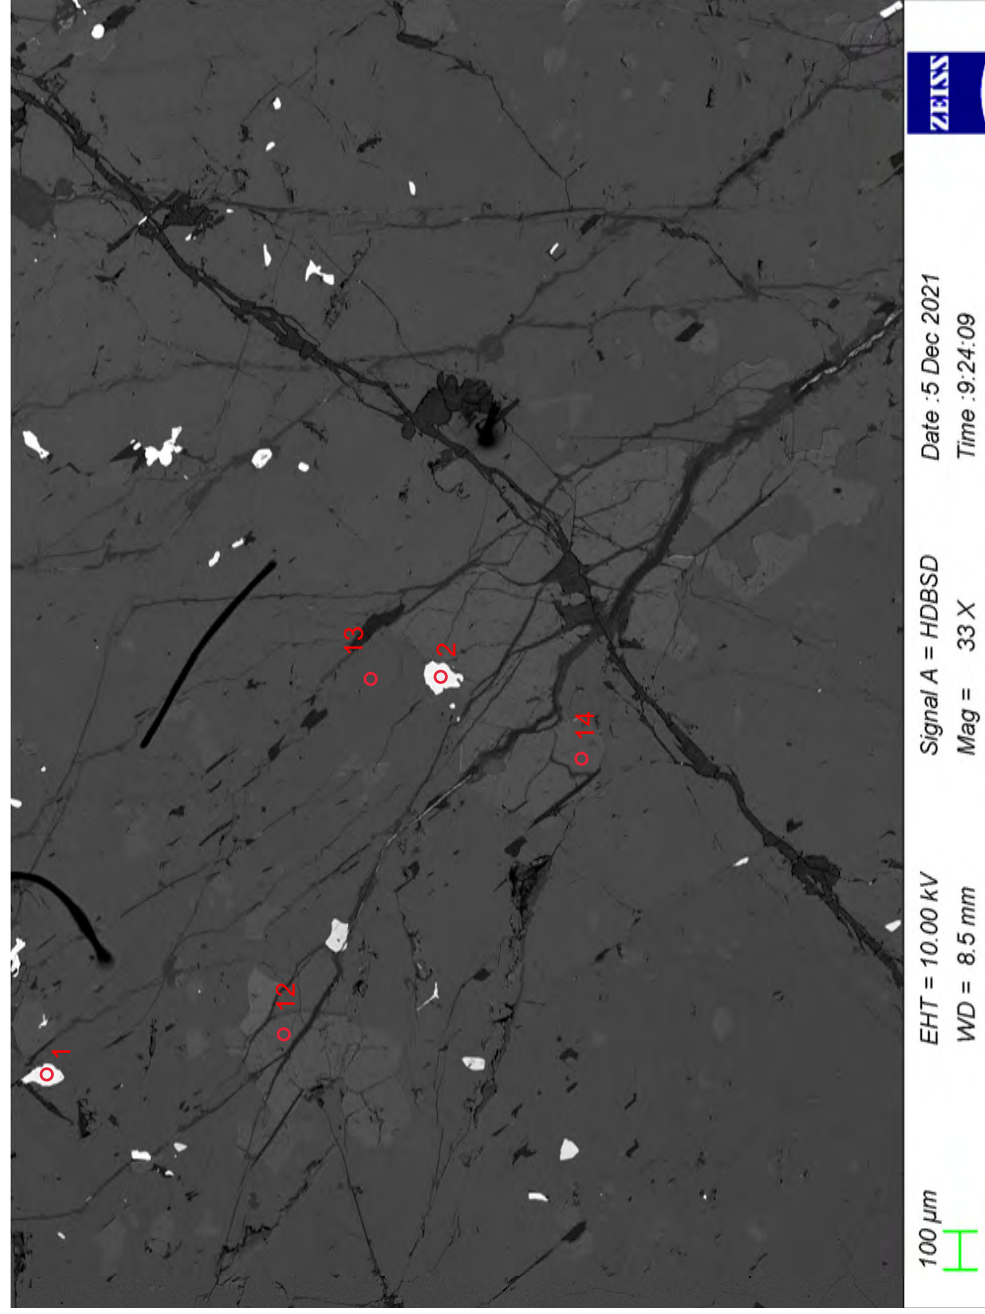

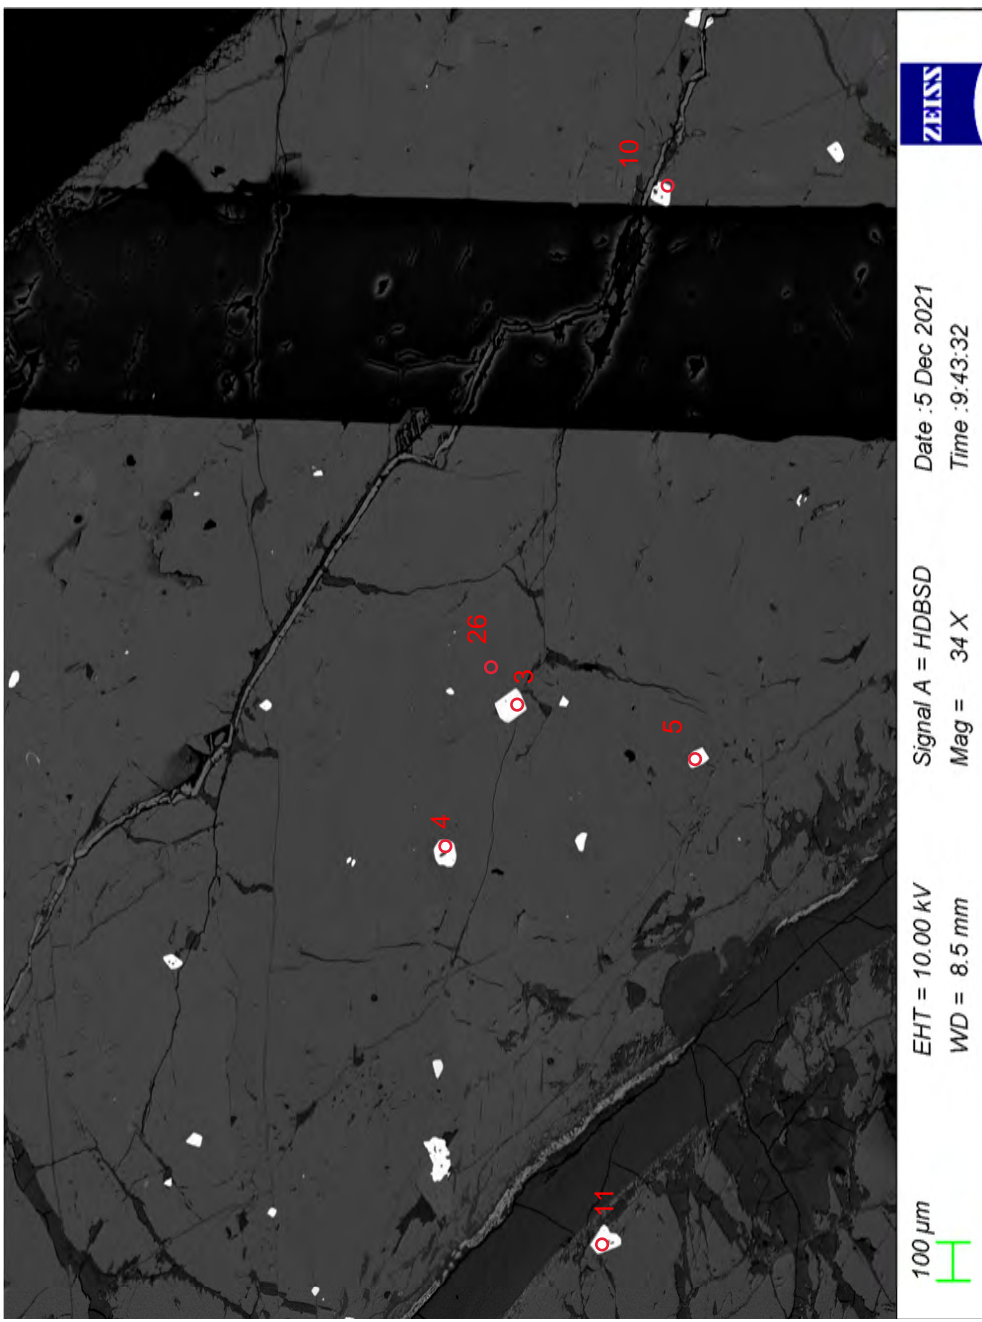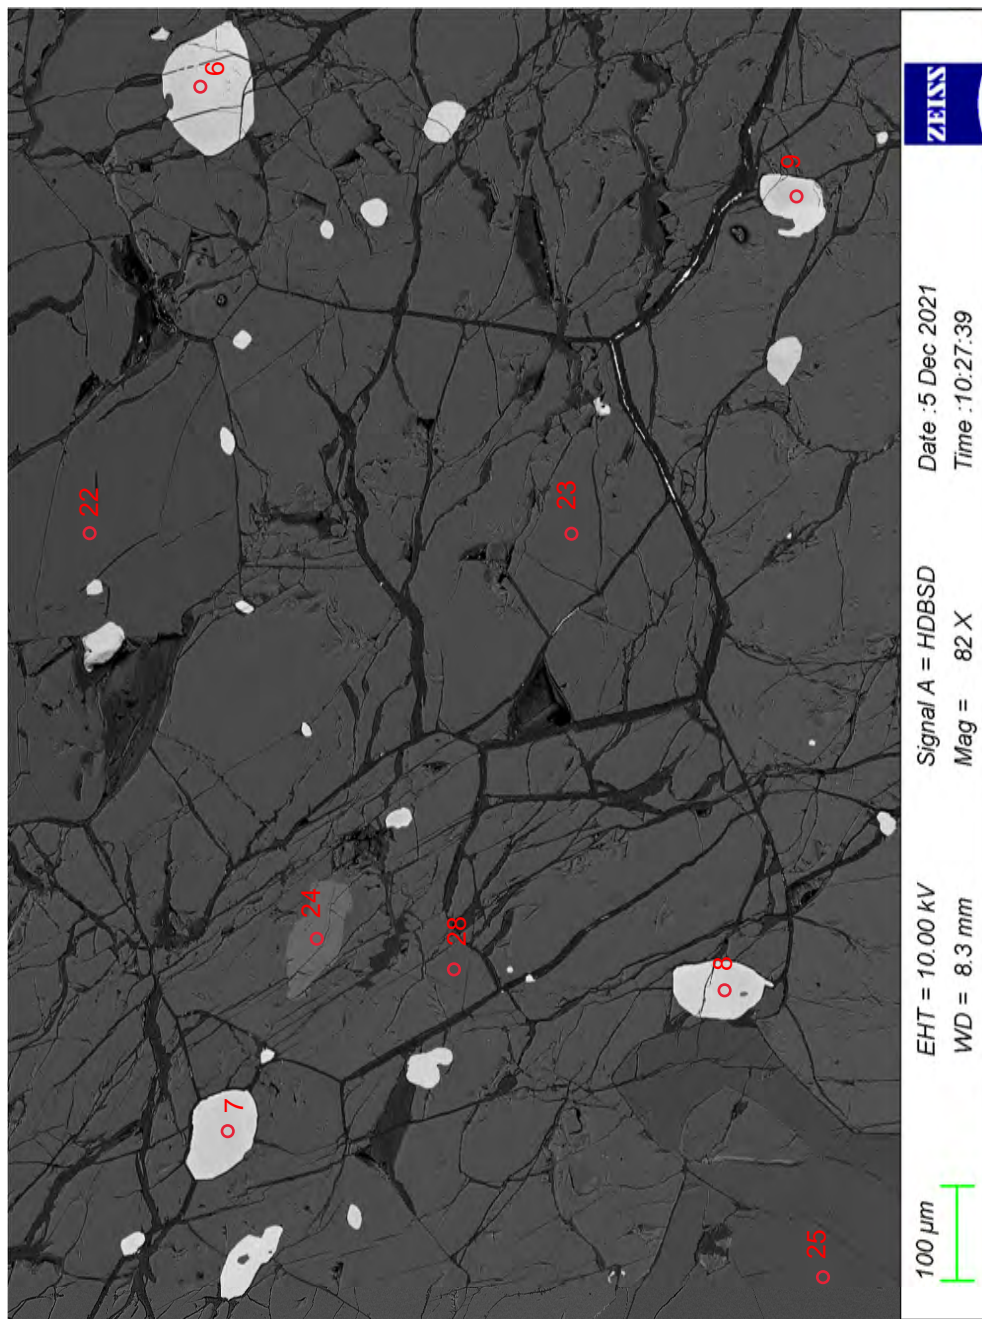

Supplement: Supplementary file 1 [file 1]
