# Supplementary material
Source: publisher figshare collection journal article supplement (https://gsapubs.figshare.com/articles/dataset/_/23200769)
Supplement: Supplementary file 1 [file 1]

## Sheet: Table S1
Table S1 Summary of locations and petrological data of peridotites from the Chagan-Uzun ophiolite
Sample	GPS	Texture	Degree of serpentinization	Mineral mode (volume %)
				Ol	Opx	Cpx	Sp	Amp
C17-17	N 50°06'24.57'' E 88°21'52.13''	Porphyroblastic	Moderate	72.7	19.6	1.2	< 1.0	4.1
C17-18	N 50°06'24.57'' E 88°21'52.13''	Porphyroblastic	Moderate	73.8	21.5	3.2	< 1.0	< 1.0
C17-19	N 50°06'24.57'' E 88°21'52.13''	Porphyroblastic	Moderate	73.6	20.1	1.2	< 1.0	2.9
C17-20	N 50°06'24.57'' E 88°21'52.13''	Porphyroblastic	Moderate	78	18	1.5	1.5	2.8
C17-21	N 50°06'24.57'' E 88°21'52.13''	Porphyroblastic	Moderate	77.3	10.8	4.2	< 1.0	5.4
C17-30	N 50°06'34.98'' E 88°21'30.18''	Porphyroblastic	Moderate	75.5	19.3	1.4	1.4	2.3
C17-31	N 50°06'34.98'' E 88°21'30.18''	Porphyroblastic	Moderate	73.8	23.1	―	1.3	1.8
C17-32	N 50°06'34.98'' E 88°21'30.18''	Porphyroblastic	Moderate	78.1	17.8	< 1.0	< 1.0	2.2
C17-59	N 50°09'02.20'' E 88°14'46.62''	Porphyroblastic	Low	76.9	14.8	< 1.0	< 1.0	6.8
C17-62	N 50°09'02.20'' E 88°14'46.62''	Porphyroblastic	Low	73.6	21.8	―	< 1.0	4.1
C17-63	N 50°09'02.20'' E 88°14'46.62''	Porphyroblastic	Low	64.8	25	3.2	< 1.0	5.9
C17-64	N 50°09'02.20'' E 88°14'46.62''	Porphyroblastic	Low	74.2	15.6	2.4	< 1.0	6.3
C17-68	N 50°09'02.20'' E 88°14'46.62''	Porphyroblastic	Low	78.1	14.3	tr	< 1.0	6.5
C17-71	N 50°06'50.47'' E 88°18'50.09''	Porphyroblastic	Moderate	70.4	24.3	―	< 1.0	4.4
C17-72	N 50°06'50.47'' E 88°18'50.09''	Porphyroblastic	Moderate	74.1	21	―	< 1.0	4
C17-73	N 50°06'50.47'' E 88°18'50.09''	Porphyroblastic	Moderate	73.6	20	―	1	5.3
C19-52	N 50°09'04.20'' E 88°14'38.17''	Porphyroblastic	Low	63.4	26	tr	< 1.0	7.8
Notes: (1) The mineral modes are estimated from point counting (n = ~2500-3000 points). (2) Moderate degrees of serpentinization are arbitrarily defined as that about 30-60 % original minerals in volume are serpentinized, while such a value is less than 30% for samples with low degrees of serpentinization. (3) Ol, olivine; Opx, orthopyroxene, Cpx, clinopyroxene, Sp, spinel; Amp, amphibole; tr, tr…

## Sheet: Table S2
Table S2 Bulk-rock major-element compositions (wt%) of peridotites from the Chagan-Uzun ophiolite
Sample	C17-17	C17-18	C17-19	C17-20	C17-21	C17-30	C17-30R	C17-31	C17-32	C17-59	C17-62	C17-63	C17-64	C17-68	C17-68R	C17-71	C17-72	C17-73	C19-52	GBW07101			GBW07102
																				Measured value (n =2)		Recommended value	Measured value	Recommended value
																				Average	1 sigma
SiO2	47.1856	46.0115	46.3568	46.9205	46.7455	45.9245	46.042	45.1609	46.096	45.0011	46.449	45.1446	45.4764	46.0145	45.9944	46.5834	46.9988	46.3139	46.6	41.6089	0.063956	41.6512	44.6192	44.6346
TiO2	0.00886551	0.00224858	0.00439173	0.00336023	0.00218313	0.00332777	0	0	0.006714	0.0107252	0.00536054	0.00426859	0.0074604	0.0139217	0.015988	0.00327551	0	0.00109715	0.0137081	0.00909685	0.000839704	0.00970325	0.00118314	0.0047295
Al2O3	0.466636	0.274889	0.559902	0.272346	0.20647	0.980539	0.821847	0.343143	0.534703	0.869793	0.601453	0.389402	0.212462	0.73678	0.690684	0.506743	0.625548	0.720633	1.13355	0.799795	0.00105631	0.812647	0.234262	0.248299
FeOTotal	8.73788	8.65813	8.64658	8.35152	8.13255	7.98264	8.05273	7.81191	8.11654	8.23337	7.87049	8.05198	8.37298	7.69046	7.69461	7.81771	7.56753	7.68094	7.58762	7.51662	0.00833304	7.53047	7.37888	7.48986
MnO	0.145173	0.139412	0.139437	0.133289	0.140812	0.136439	0.13724	0.1343	0.135399	0.13621	0.144735	0.14193	0.136419	0.128508	0.127904	0.139755	0.135136	0.139339	0.120209	0.101898	0.00363295	0.0824776	0.123047	0.11469
MgO	42.0806	43.3735	42.8666	42.1897	42.5904	43.2809	43.2793	44.6526	43.4926	44.554	43.7132	44.4153	44.1445	43.1145	43.1517	43.4194	43.0808	43.5006	42.3748	49.6441	0.0566471	49.7655	45.2831	45.3322
CaO	1.23452	1.4256	1.30874	1.87053	2.06197	1.51414	1.51739	1.50777	1.45022	1.06394	1.07318	1.36701	1.49315	1.49498	1.49648	1.34296	1.48758	1.49103	1.33495	0.221382	0.00472756	0.121291	2.19354	2.12827
Na2O	0.111927	0.0989374	0.0988139	0.226255	0.102607	0.156405	0.131706	0.360015	0.144351	0.109397	0.121148	0.451403	0.136419	0.0803176	0.0916648	0.168143	0.0871844	0.136047	0.114937	0.0709391	0.0230183	0.00970325	0.139611	0.0331065
K2O	0.0121901	0.00112429	0.00658759	0.0168011	0.00545784	0.0077648	0.00664065	0.0146715	0.008952	0.00750764	0.00857686	0.0202758	0.0074604	0.00963811	0.0106587	0.00655102	0.00544903	0.00438862	0.0105447	0.00970592	0.00173472	0.0121291	0.00946513	0.0106414
P2O5	0.0166228	0.0146158	0.0120773	0.0156811	0.0120072	0.0133111	0.0110677	0.0146715	0.014547	0.0139428	0.0128653	0.0138729	0.0127893	0.00642541	0.00639522	0.0120102	0.0119879	0.0120687	0.00843573	0.017588	0.000822871	0.00485162	0.0177471	0.00354712
Cr2O3	n.a.	n.a.	n.a.	n.a.	n.a.	n.a.	n.a.	n.a.	n.a.	n.a.	n.a.	n.a.	n.a.	0.433715	0.443402	n.a.	n.a.	n.a.	0.427059	n.a.			n.a.
NiO	n.a.	n.a.	n.a.	n.a.	n.a.	n.a.	n.a.	n.a.	n.a.	n.a.	n.a.	n.a.	n.a.	0.276292	0.27606	n.a.	n.a.	n.a.	0.274161	n.a.			n.a.
LOI	8.23043	8.33362	7.5275	8.90309	6.02082	8.5022		8.63176	9.33547	5.06435	6.12027	4.97596	4.59278	4.79856		7.78217	7.38643	7.25753	4.22084
Mg#	89.567	89.9297	89.835	90.0054	90.3248	90.6237	90.5489	91.063	90.5233	90.6072	90.8264	90.769	90.3832	90.904	90.9067	90.8263	91.03	90.9876	90.8722
Notes:
(1) LOI, loss on ignition
(2) n.a., not analyzed
(3) The subscript R means repeated analysis
(4) The oxides are normalized to 100 wt%
(5) Mg# = 100 × MgO/(MgO + FeOTotal) (molar ratios)
(6) The recommended major-element compositions of the two Chinese national standards of ultramafic rocks (i.e., GBW07101 and GBW07102) are from List of Reference Materials of the People's Republic of China, which was published in 2010.

## Sheet: Table S3
Table S3 Trace-element compositions (ppm) of peridotites from the Chagan-Uzun ophiolite
Sample	C17-17	C17-18	C17-19	C17-21	C17-30	C17-31	C17-32	C17-59	C17-62	C17-63	C17-64	C17-71	C17-72	BHVO-2			W-2			JP-1		AGV-2			BCR-2			RGM-2
														Measured value	Recommended value	Relative deviation	Measured value	Recommended value	Relative deviation	Measured value	Recommended value	Measured value	Recommended value	Relative deviation	Measured value	Recommended value	Relative deviation	Measured value	Recommended value	Relative deviation
Li	9.41418	6.09502	7.42645	7.22983	5.63934	5.72591	5.30029	2.70232	3.36232	2.377	3.3013	5.02723	5.73214	5.19111	4.5	0.15358	9.22719	9.21	0.00186598	1.8899	1.418-2.1
Be	0.342068	0.332691	0.351597	0.361357	0.392515	0.398431	0.366759	0.278175	0.304762	0.319799	0.312737	0.276823	0.323359	0.946346	1.076	-0.120497	0.644416	0.672	-0.0410469	0.303075	0.0067-6.785
Sc	12.364	13.2449	12.1552	15.0628	14.3163	13.9961	12.6294	11.8168	11.6076	13.6549	12.5705	18.9094	20.1064	33.9998	31.83	0.0681678	37.9812	35.86	0.0591533	5.43476	6.37-9
V	40.9936	36.4857	39.8806	43.7535	42.6434	41.7852	40.5697	37.4617	38.4587	36.8672	46.9811	41.4766	43.9811	321.607	318.2	0.0107081	286.713	265.8	0.07868	25.7772	27.6-29
Cr	2810.5	2403.49	2803.23	2610.66	2999.26	2838.35	2656.19	2662.4	2704.42	2439.95	2799.49	2607.27	2691.62	299.713	287.2	0.0435696	95.7552	92	0.0408171	2806.71	2807-2970
Co	111.26	111.008	110.866	107.017	100.97	100.07	98.8354	112.119	109.176	115.735	108.433	106.562	102.083	46.458	44.89	0.0349288	46.3552	44.37	0.0447423	117.776	116
Ni	2124.52	2166.04	2139.27	2096.62	1972.39	1986.98	1928.4	2203.69	2156.21	2306.43	2104.36	2117.63	2023.42	122.482	119.8	0.0223873	72.9331	72	0.0129596	2357.45	2460-2474
Cu	3.18747	3.02247	3.94437	1.70385	1.42868	2.18973	2.24298	3.13691	2.79829	4.65356	3.81153	3.4467	2.09177	129.513	129.3	0.00164481	106.963	105.9	0.0100393	3.70432	3.46-7.2
Zn	45.1836	44.7886	46.4467	43.4714	43.1075	42.4632	41.736	46.313	44.3945	45.4105	44.4044	42.6365	373.869	104.778	103.9	0.00845005	79.5321	77.7	0.0235793	47.1084	29.9-61
Ga	0.894255	0.64014	0.834587	0.747377	0.819346	0.767039	0.742596	0.739789	0.748057	0.581961	0.95981	0.768158	0.80338	22.0197	21.39	0.0294391	18.2079	17.88	0.0183376	0.550012	0.5-0.7
Rb	0.221442	0.138847	0.252047	0.196143	0.133236	0.137362	0.132704	0.241958	0.303056	0.11542	0.1512	0.150216	0.202377	9.36603	9.261	0.0113407	20.0857	20.23	-0.00713265	0.355314	0.256-0.6
Sr	5.05049	4.65715	4.24962	5.57403	1.39716	1.42549	1.41573	3.74916	1.92982	1.80082	2.09776	9.75489	14.8039	367.59	394.1	-0.0672663	199.507	195.4	0.0210177	0.570861	0.256-0.6
Y	0.143596	0.130368	0.15652	0.182375	0.12002	0.0981433	0.087183	0.0817124	0.0886532	0.081051	0.141065	0.0886562	0.114826	23.9095	25.91	-0.0772102	19.4222	21.82	-0.109892	0.0894318	0.064-1
Zr	0.260261	0.160314	0.160172	0.168616	0.139102	0.0872522	0.0629563	0.098293	0.142285	0.165792	0.161007	0.0555023	0.152886	167.494	171.2	-0.0216489	99.1917	93.3	0.0631483	5.10884	4.017-6.149
Nb	0.122318	0.0925684	0.0961939	0.261913	0.0823862	0.0772839	0.0716619	0.051689	0.0537667	0.0754893	0.0758175	0.0663163	0.0716325	19.1636	18.1	0.0587618	7.75921	7.51	0.0331842	0.0829687	0.03-1
Cs	0.0330088	0.023301	0.0378075	0.0373332	0.0336182	0.0360158	0.0331602	0.0204835	0.0241407	0.0106056	0.0129335	0.109121	0.085087	0.104689	0.0996	0.0510977	0.918249	0.915	0.00355125	0.0430286	0.02-0.058
Ba	5.27536	3.04245	3.79309	4.88953	1.19304	1.48315	1.06605	3.00738	3.22388	0.97711	3.98244	1.73173	1.74645	130.741	130.9	-0.00121263	167.966	172.8	-0.0279719	8.93006	8.7-23
La	0.0460259	0.0117167	0.00976328	0.0388112	0.00757175	0.0106214	0.0128513	0.0122842	0.0129336	0.0202461	0.0166227	0.00506539	0.00905735	15.5824	15.2	0.0251591	10.7339	10.63	0.00977708	0.0296246	0.0209-0.09
Ce	0.119415	0.0323478	0.023297	0.0724462	0.0191447	0.0210549	0.0256262	0.0326261	0.0296496	0.0379737	0.0436871	0.0104586	0.0189412	37.3197	37.53	-0.00560398	23.8125	23.21	0.0259574	0.0616777	0.0423-0.076
Pr	0.0143361	0.00495115	0.0032911	0.00768153	0.00267296	0.00248458	0.00264334	0.00440931	0.00406108	0.00416054	0.00645083	0.00105327	0.00218062	5.43639	5.339	0.018242	3.05392	3.018	0.0119014	0.00776286	0.00081-0.014
Nd	0.0551603	0.0223903	0.0170122	0.0289307	0.0124802	0.00900648	0.00847709	0.018103	0.0171419	0.0151762	0.0299569	0.00405935	0.00867699	25.0739	24.27	0.0331232	13.22	13.09	0.00992922	0.0307273	0.027-0.073
Sm	0.00991236	0.00581013	0.0059435	0.00595346	0.0043296	0.00224278	0.00154033	0.0032044	0.00489824	0.00366528	0.00776948	0.00124942	0.00236048	6.05002	6.023	0.00448588	3.24437	3.3	-0.0168565	0.00829566	0.00705-0.039
Eu	0.00379874	0.00292161	0.00306698	0.00394022	0.0019283	0.0015049	0.00151705	0.00334867	0.00202738	0.00174014	0.00340302	0.000755918	0.00134524	2.12735	2.043	0.0412889	1.14005	1.091	0.0449602	0.00347496	0.003-0.004
Gd	0.0127355	0.0084272	0.0102665	0.0101631	0.00665353	0.00352524	0.00233987	0.00345808	0.00667934	0.00558189	0.00898862	0.00259123	0.00495252	6.34047	6.207	0.0215028	3.85709	3.713	0.0388071	0.00992765	0.00644-0.015
Tb	0.00219324	0.00185769	0.00235015	0.00209892	0.00143905	0.000793705	0.000592474	0.000774334	0.00143071	0.000901041	0.00195869	0.000802814	0.00111611	0.992781	0.9392	0.0570501	0.645173	0.627	0.0289842	0.0018645	0-0.004
Dy	0.0179159	0.0161846	0.0199808	0.0209989	0.0136881	0.00992501	0.00825696	0.00859463	0.0111937	0.00861114	0.0174321	0.00904333	0.0127864	5.41248	5.28	0.0250907	3.89944	3.806	0.0245509	0.0134762	0.01-0.032
Ho	0.00533484	0.00474239	0.00577993	0.00652357	0.00425863	0.00345462	0.00292203	0.00282956	0.00321116	0.00299895	0.00537953	0.00322672	0.00422875	1.00858	0.9887	0.0201047	0.80287	0.7908	0.0152628	0.00345821	0-0.005
Er	0.021485	0.0202616	0.0227687	0.0278752	0.0184801	0.0164717	0.0144596	0.0132782	0.0137876	0.0141843	0.0226219	0.0152938	0.0191619	2.62112	2.511	0.0438545	2.30984	2.208	0.0461223	0.0125415	0.01-0.02
Tm	0.00448133	0.00376918	0.00445189	0.00551331	0.00383463	0.00352691	0.00331115	0.00306413	0.00288569	0.00287544	0.00454936	0.00334397	0.0039713	0.338678	0.3349	0.0112798	0.324795	0.3315	-0.0202251	0.00241379	0-0.0037
Yb	0.0355999	0.0315958	0.0356159	0.0465677	0.0327098	0.031488	0.0297215	0.0283771	0.0251433	0.0277911	0.0415755	0.0303974	0.0330457	2.03567	1.994	0.0208961	2.08734	2.054	0.0162338	0.0205983	0.018-0.027
Lu	0.00693233	0.00640385	0.00706759	0.00862368	0.00666794	0.00634912	0.00620768	0.00588391	0.00496946	0.0057919	0.00806338	0.0062133	0.00705347	0.289262	0.2754	0.0503329	0.311801	0.309	0.00906508	0.00423851	0.0044
Hf	0.00719264	0.00578201	0.00576544	0.00475352	0.00431032	0.00291374	0.00241535	0.00304	0.0037236	0.00466817	0.00474512	0.00191205	0.00438328	4.52154	4.47	0.0115301	2.62616	2.444	0.0745346	0.128214	0.08-0.2
Ta	0.0734111	0.066745	0.0600388	0.0588822	0.0505157	0.0590439	0.0449213	0.0301743	0.0287361	0.0380724	0.037378	0.0402995	0.0413881	1.27969	1.154	0.108915	0.619396	0.489	0.266658	0.0409102	0.02-0.068
Pb	0.0634929	0.054117	0.0615764	0.0711069	0.0406734	0.0549983	0.0288146	0.0710596	0.0654222	0.117345	0.0935352	0.0447411	0.101499	1.48118	1.653	-0.103946	7.64277	7.83	-0.0239113	0.0934469	0.07-0.21
Th	0.00481604	0.00250214	0.002065	0.00550723	0.00183946	0.0023929	0.00247475	0.00109212	0.00176248	0.00258591	0.00145316	0.00148888	0.00280123	1.1518	1.224	-0.0589838	2.0907	2.179	-0.0405248	0.0117011	0.009-0.06
U	0.00507001	0.00221059	0.00335611	0.00418453	0.00168928	0.00411878	0.00468027	0.0045353	0.00403638	0.00456804	0.00250222	0.00179149	0.00414091	0.439815	0.412	0.0675115	0.532158	0.5048	0.0541963	0.0141155	0.01-0.04
Ti	33.7939	29.1787	32.739	32.373	27.2682	18.9265	17.6338	27.3999	26.3748	14.0119	31.7529	15.3473	21.1718	16243	16300	-0.00349693						6197	6300	-0.0163492	13672	13500	0.0127407	1610	1618	-0.00494438
Notes:
(1) Recommonded values of the three international standards (diabase W-2, basalt BHVO-2 and peridotite JP-1) are cited from GERM database
(2) The element Ti (marked by bold italic fonts) was measured in Wuhan Sample Solution Analytical Technology Co., LTD, and other trace elements in the Radiogenic Isotope Geochemistry-RIG lab of the State Key Laboratory of Geological Processes and Mineral Resources, China University of Geosciences, Beijing

## Sheet: Table S4
Table S4 Mineral major-element compositions (wt%) of peridotites from the Chagan-Uzun ophiolite
Part I Olivines
Sample	C17-17					C17-18					C17-19				C17-20								C17-21							C17-59						C17-62							C17-63			C17-64
Spot_#	6	11	17	20	24	3	5	10	20	23	1	9	23	30	1	9	15	21	29	32	36	38	2	12	14	21	23	30	39	4	9	16	19	23	33	1	3	8	12	14	17	18	8	13	14	9	11	13	17
SiO2	40.827	40.666	40.394	41.049	40.918	40.729	40.985	40.998	40.751	40.891	40.687	40.649	41.057	41.363	41.326	41.112	41.486	40.896	40.98	41.346	40.704	41.142	40.559	40.681	40.969	40.991	40.917	41.098	40.858	40.611	41.004	40.909	40.907	40.646	41.494	40.513	40.857	40.895	40.835	40.848	40.862	40.77	40.162	40.033	39.781	40.213	40.285	40.453	40.625
Na2O	-	0.012	0.006	0.01	0.002	0.009	0.024	-	-	-	0.002	0.008	-	-	0.004	-	-	0.009	-	-	-	-	-	0.005	0.005	0.013	-	0.022	0.019	0.002	0.014	-	-	-	0.008	0.004	0.014	0.007	0.007	-	0.01	-	0.02	-	0.04	-	0.008	-	-
K2O	0.011	-	-	-	-	0.011	-	-	-	0.005	-	0.005	0.009	0.007	0.014	-	-	-	0.008	0.011	-	-	0.007	-	-	0.006	0.002	-	-	0.006	0.01	-	-	-	0.002	-	0.003	0.001	0.003	0.001	-	-	-	0.001	0.005	-	0.002	-	-
Cr2O3	-	-	-	0.014	-	0.009	-	-	0.009	0.009	0.032	0.032	-	-	0.009	-	0.044	0.044	0.031	-	-	0.066	-	-	0.017	0.034	-	-	-	-	0.059	-	0.032	0.036	-	0.004	-	-	-	0.004	-	-	0.02	-	-	0.013	0.021	0.007	-
Al2O3	0.01		0.001	0.024	-	0.003	0.021	-	0.016	-	0.005	0.002	-	-	0.02	0.006	0.001	-	0.019	0.012	-	-	0.013	-	-	-	-	-	-	-	0.005	-	0.009	0.011	0.006	0.011	-	0.01	0.002	-	-	0.007	-	-	0.005	0.004	-	-	-
MgO	50.082	50.024	49.599	50.273	50.146	50.199	49.73	49.684	49.771	50.081	49.796	50.081	50.335	50.668	49.638	49.899	50.063	49.789	49.577	49.601	49.457	49.368	49.685	48.93	49.256	49.624	50.096	49.808	49.984	50.324	50.409	49.775	50.014	49.865	50.061	49.537	49.473	49.965	49.895	49.778	49.842	49.127	49.787	49.757	49.878	49.247	49.391	49.191	49.018
CaO	0.001	-	0.012	-	0.008	0.001	0.018	0.002	0.009	0.008	0.003	0.008	0.001	-	0.009	0.023	0.018	0.015	0.007	0.014	0.021	0.016	0.009	0.014	0.012	0.01	0.015	0.004	0.007	0.005	0.017	0.002	0.009	-	-	0.003	0.019	0.012	0.006	-	0.002	0.004	-	-	-	0.022	-	-	-
MnO	0.176	0.207	0.116	0.129	0.177	0.202	0.12	0.114	0.147	0.085	0.173	0.128	0.171	0.176	0.112	0.059	0.111	0.135	0.051	0.103	0.099	0.112	0.154	0.173	0.158	0.097	0.076	0.069	0.112	0.209	0.051	0.097	0.213	0.118	0.084	0.094	0.026	0.169	0.123	0.122	0.109	0.156	0.101	0.139	0.115	0.123	0.145	0.15	0.114
TiO2	-	-	-	-	0.006	-	-	-	-	-	-	0.037	0.043	-	0.014	0.006	0.002	0.022	-	0.012	-	-	-	-	-	0.006	0.012	-	0.013	0.025	0.025	0.025	0.057	0.035	-	-	0.035	-	0.002	-	0.041	-	-	-	0.029	-	-	0.031	-
FeOTotal	8.794	8.94	8.833	8.966	9.23	8.758	9.007	8.935	8.795	9.343	8.401	8.877	9.109	8.097	8.203	8.941	8.632	8.811	8.66	8.177	8.42	8.187	8.65	8.505	8.83	8.955	8.921	8.174	8.034	8.944	8.737	8.482	8.742	8.935	8.134	8.961	8.784	9.164	8.731	9.044	9.229	8.952	9.174	9.181	9.231	9.317	9.54	9.401	8.56
NiO	0.292	0.371	0.362	0.377	0.407	0.296	0.349	0.413	0.351	0.365	0.52	0.424	0.419	0.377	0.315	0.332	0.358	0.346	0.399	0.432	0.406	0.398	0.318	0.34	0.327	0.364	0.384	0.383	0.393	0.401	0.373	0.464	0.311	0.483	0.356	0.467	0.325	0.351	0.504	0.374	0.315	0.363	0.401	0.484	0.478	0.354	0.358	0.382	0.36
Total	100.193	100.22	99.323	100.842	100.894	100.217	100.254	100.146	99.849	100.787	99.619	100.251	101.144	100.688	99.664	100.378	100.715	100.067	99.732	99.708	99.107	99.289	99.395	98.648	99.574	100.1	100.423	99.558	99.42	100.527	100.704	99.754	100.294	100.129	100.145	99.594	99.536	100.574	100.108	100.171	100.41	99.379	99.665	99.595	99.562	99.293	99.75	99.615	98.677
Mg#	91.0331	90.8882	90.9172	90.9052	90.641	91.0855	90.7769	90.8362	90.9812	90.5262	91.3542	90.9559	90.7839	91.773	91.5161	90.8665	91.1807	90.9692	91.0756	91.535	91.2822	91.4889	91.1027	91.1156	90.8625	90.8075	90.9177	91.57	91.7292	90.9339	91.1387	91.2748	91.0703	90.8664	91.6467	90.7872	90.9421	90.6712	91.0612	90.7506	90.5902	90.7259	90.6317	90.6201	90.5945	90.4053	90.224	90.3173	91.0778
Part II Orthopyroxenes
Sample	C17-17							C17-18				C17-19							C17-20					C17-21							C17-59					C17-62				C17-63					C17-64				C17-68
Spot_#	1	3	4	9	16	21	26	2	12	7	19	3	11	14	16	22	25	33	8	11	16	20	27	8	18	22	25	29	35	38	5	6	10	20	22	5	9	22	26	7	9	10	12	15	14	15	16	18	4
SiO2	56.182	55.463	55.965	55.805	56.106	55.802	56.237	55.971	56.501	56.696	56.319	56.106	56.157	56.31	55.899	56.14	55.964	58.006	56.705	56.247	57.034	56.87	57.345	56.065	56.71	56.264	57.191	56.276	56.516	56.748	56.603	57.118	56.45	56.223	56.344	56.937	56.824	56.694	57.538	55.703	56.827	56.054	56.115	57.467	56.278	56.798	57.231	56.971	58.016
Na2O	0.009	-	0.005	0.007	0.018	-	-	-	-	0.012	0.024	0.007	-	-	0.018	0.01	0.019	-	0.006	0.003	0.008	-	0.002	0.004	-	0.016	0.024	-	0.02	-	-	-	0.021	-	-	0.011	-	-	-	-	0.018	-	-	-	-	-	0.006	0.014	0.05
K2O	0.002	0.003	0.004	0.004	-	-	0.012	0.006	-	-	0.006	0.001	0.002	-	0.002	0.003	0.005	-	0.002	-	-	0.002	-	-	-	-	-	0.002	0.008	0.003	-	0.001	-	0.008	0.001	-	0.004	-	0.002	-	0.001	0.001	0.013	-	-	0.007	0.005	0.002	0.013
Cr2O3	0.279	0.369	0.347	0.283	0.338	0.324	0.333	0.337	0.387	0.31	0.373	0.132	0.333	0.342	0.279	0.315	0.265	0.186	0.259	0.281	0.188	0.285	0.085	0.289	0.25	0.22	0.108	0.315	0.311	0.216	0.215	0.207	0.321	0.202	0.188	0.205	0.1	0.273	0.091	0.184	0.222	0.255	0.246	0.08	0.248	0.1	0.088	0.072	0.004
Al2O3	1.864	2.269	2.185	2.172	2.339	2.222	2.19	2.275	2.36	1.915	2.336	1.814	2.114	1.84	2.427	2.299	2.358	1.683	2.125	2.14	1.823	2.015	0.872	2.167	1.564	1.759	1.381	1.994	1.586	1.402	1.747	1.621	1.7	1.767	1.444	1.156	1.024	1.498	0.716	1.514	1.064	1.955	1.819	0.44	1.351	1.083	0.888	1.067	0.365
MgO	34.301	34.116	34.305	34.172	34.396	33.899	34.168	34.123	34	34.483	34.122	34.78	34.44	34.536	33.975	34.091	33.79	35.049	34.756	34.249	34.728	34.569	34.919	33.729	34.262	34.483	34.76	33.935	33.892	34.821	35.053	35.163	34.753	34.236	34.547	34.699	34.65	34.405	34.926	34.891	34.975	34.715	34.453	35.324	34.484	34.965	34.943	35.185	35.047
CaO	0.208	0.299	0.204	0.315	0.353	0.255	0.196	0.377	0.408	0.191	0.441	0.252	0.222	0.175	0.428	0.365	0.368	0.238	0.195	0.377	0.207	0.237	0.37	0.321	0.19	0.179	0.288	0.295	0.237	0.24	0.292	0.222	0.274	0.295	0.283	0.251	0.227	0.29	0.261	0.204	0.303	0.327	0.343	0.318	0.279	0.32	0.285	0.236	0.296
MnO	0.121	0.047	0.14	0.054	0.187	0.134	0.173	0.153	0.215	0.109	0.18	0.179	0.095	0.127	0.179	0.162	0.16	0.121	0.087	0.156	0.176	0.149	0.097	0.096	0.151	0.233	0.139	0.135	0.2	0.148	0.146	0.161	0.189	0.188	0.14	0.098	0.168	0.16	0.129	0.136	0.133	0.114	0.133	0.102	0.155	0.119	0.175	0.149	0.073
TiO2	-	-	0.014	0.049	0.016	0.025	0.012	-	0.049	0.012	0.014	-	0.033	-	0.033	0.01	-	0.008	0.002	-	0.006	0.01	0.032	-	0.048	0.075	0.016	-	-	-	-	0.027	-	-	0.002	0.035	0.039	-	-	0.012	0.007	0.007	-	-	-	0.003	0.01	0.005	-
FeOTotal	5.896	6.238	6.218	6	5.99	5.95	6.064	6.345	6.072	6.149	6.091	5.884	6.026	5.957	5.944	5.99	5.962	5.798	6.048	5.896	5.716	6.234	5.365	5.846	6.298	6.097	5.841	5.945	5.8	5.854	6.195	5.546	5.82	6.017	5.995	5.717	6.115	5.784	5.669	6.302	6.013	6.077	6.377	5.999	6.219	6.032	5.938	6.277	5.363
NiO	0.102	0.157	0.047	0.118	0.082	0.068	0.08	0.131	0.073	0.032	0.085	0.098	0.047	0.166	0.115	0.112	0.092	0.045	0.111	0.074	0.088	0.091	0.097	0.077	0.055	0.085	0.05	0.055	0.165	0.03	0.03	0.081	0.069	0.041	0.125	0.022	0.122	0.084	0.185	0.048	0.092	0.094	0.035	0.089	0.094	0.086	0.1	0.028	0.083
Total	98.964	98.961	99.434	98.979	99.825	98.679	99.465	99.718	100.065	99.909	99.991	99.253	99.469	99.453	99.299	99.497	98.983	101.134	100.296	99.423	99.974	100.462	99.184	98.594	99.528	99.411	99.798	98.952	98.735	99.462	100.281	100.147	99.597	98.977	99.069	99.131	99.273	99.188	99.517	98.994	99.655	99.599	99.534	99.819	99.108	99.513	99.669	100.006	99.31
Mg#	91.2055	90.6971	90.7705	91.0335	91.1003	91.0364	90.9456	90.5543	90.894	90.9065	90.8978	91.3323	91.062	91.1777	91.0628	91.0278	90.9936	91.5082	91.1065	91.1933	91.5473	90.8131	92.0651	91.1387	90.6522	90.9764	91.3856	91.0519	91.2409	91.3819	90.9801	91.8714	91.4124	91.0257	91.129	91.5395	90.9919	91.382	91.6545	90.8	91.204	91.0581	90.5936	91.3018	90.8127	91.1763	91.2969	90.9027	92.0945
Part III Clinopyroxenes
Sample	C17-17						C17-18					C17-19							C17-20						C17-21						C17-59				C17-63					C17-64				C17-68	C19-52
Spot_#	2	7	10	15	18	25	1	13	9	16	18	4	7	8	12	17	19	21	5	12	14	26	28	34	1	10	15	17	26	27	1	3	8	25	3	4	5	6	11	7	8	10	12	27	24
SiO2	53.72	54.021	53.904	54.41	54.191	54.147	54.857	54.306	54.677	54.131	54.132	54.728	54.367	53.829	54.071	54.791	54.94	54.357	54.078	53.829	54.158	53.796	53.712	53.994	53.498	52.982	53.819	53.844	53.721	54.079	54.665	54.643	54.189	54.247	53.924	54.003	53.984	54.293	53.911	53.863	53.615	54.099	54.189	54.774	54.177
Na2O	0.141	0.093	0.134	0.061	0.088	0.114	0.068	0.14	0.023	0.082	0.06	0.085	0.086	0.083	0.069	0.124	0.072	0.113	0.1	0.073	0.062	0.147	0.089	0.083	0.1	0.144	0.147	0.102	0.123	0.12	0.033	0.062	0.056	0.031	0.111	0.059	0.086	0.061	0.083	0.113	0.087	0.11	0.098	0.071	0.094
K2O	-	-	-	0.005	-	0.002	-	0.003	-	-	-	-	-	0.005	0.003	0.005	0.001	-	-	0.006	-	0.001	0.008	0.01	0.002	0.001	-	-	-	-	-	-	-	0.003	0.007	0.008	-	0.001	-	0.006	-	0.005	0.002	0.008	0.001
Cr2O3	0.272	0.314	0.229	0.346	0.43	0.496	0.308	0.234	0.308	0.411	0.327	0.286	0.384	0.416	0.462	0.305	0.29	0.276	0.462	0.398	0.412	0.43	0.316	0.307	0.425	0.341	0.375	0.252	0.301	0.411	0.198	0.108	0.193	0.254	0.244	0.146	0.229	0.246	0.256	0.253	0.22	0.252	0.245	0.226	0.251
Al2O3	1.385	1.59	1.698	0.874	1.787	1.545	1.23	1.767	1.079	1.492	1.672	1.166	1.453	1.76	1.656	1.723	1.207	1.769	1.567	1.618	1.369	1.66	1.498	1.333	1.583	1.761	1.516	1.436	1.395	1.454	0.773	0.764	0.838	1.163	1.015	1.105	0.977	0.839	1.139	1.078	0.807	1.119	0.899	0.683	0.772
MgO	17.733	17.738	17.854	17.976	17.799	17.865	17.953	17.624	17.869	17.922	17.751	17.858	17.626	17.458	17.669	17.949	18.098	17.701	17.701	17.847	18.04	17.915	17.659	17.919	17.681	17.382	17.62	17.782	17.499	17.788	18.081	18.002	17.837	17.817	17.765	17.942	17.801	17.947	17.995	17.677	18.004	17.972	17.63	18.349	17.943
CaO	24.232	23.97	23.634	24.407	23.687	23.951	24.303	23.86	24.496	24.364	24.188	24.135	24.147	23.696	24.088	24.278	24.436	23.846	24.361	24.21	24.627	23.994	24.417	24.685	23.88	23.681	23.573	23.625	24.094	24.052	24.304	24.507	24.315	24.118	24.584	24.322	24.836	25.014	24.555	24.657	24.564	24.552	24.612	24.612	24.794
MnO	0.006	0.075	-	0.052	-	0.046	0.047	0.082	0.061	0.029	0.056	0.033	0.06	0.075	0.013	0.015	0.037	0.068	0.107	0.161	0.049	0.073	0.016	0.018	0.058	0.094	0.101	0.039	0.12	0.032	0.116	0.088	0.057	0.121	0.061	0.06	0.024	0.044	0.043	0.078	0.103	0.069	0.074	0.046	0.058
TiO2	-	0.051	-	0.023	-	0.017	0.004	0.004	0.027	-	-	0.015	-	-	-	0.025	0.013	-	0.002	0.016	-	-	-	-	0.058	-	-	0.022	0.026	-	0.009	-	-	0.032	-	-	0.042	0.075	0.004	0.022	0.012	0.006	0.01	-	0.027
FeOTotal	1.89	1.937	2.168	1.692	2.07	1.881	1.756	2.066	1.795	1.765	1.929	1.894	1.691	2.028	1.859	2.144	1.799	2.002	1.657	1.835	1.852	2.078	1.885	1.705	1.924	1.98	1.95	2.065	1.935	1.75	1.436	1.59	1.505	1.68	1.548	1.708	1.584	1.625	1.593	1.755	1.474	1.748	1.635	1.537	1.638
NiO	-	0.051	0.099	0.052	0.009	0.148	0.048	0.036	0.03	0.045	0.051	0.038	0.119	0.046	0.091	0.01	0.005	0.057	0.045	0.064	0.03	-	0.002	0.032	0.084	0.058	0.071	0.052	0.013	0.052	0.068	0.052	0.04	0.069	0.043	0.029	0.065	0.033	0.053	0.021	0.021	0.032	0.019	-	0.021
Total	99.379	99.84	99.72	99.898	100.061	100.212	100.574	100.122	100.365	100.241	100.166	100.238	99.933	99.396	99.981	101.369	100.898	100.189	100.08	100.057	100.599	100.094	99.602	100.086	99.293	98.424	99.172	99.219	99.227	99.738	99.683	99.816	99.03	99.535	99.302	99.382	99.628	100.178	99.632	99.523	98.907	99.964	99.413	100.306	99.776
Mg#	94.3584	94.2278	93.6226	94.9847	93.8756	94.423	94.7985	93.8297	94.6655	94.7647	94.2542	94.3845	94.893	93.8822	94.4268	93.7201	94.7183	94.0339	95.0107	94.5467	94.5546	93.8907	94.3503	94.9328	94.2469	93.9938	94.1547	93.884	94.1592	94.7698	95.7348	95.2792	95.4807	94.9762	95.3397	94.9305	95.2456	95.1663	95.269	94.7244	95.609	94.8262	95.0549	95.5119	95.1284
Part IV Amphiboles
Sample		C17-17			C17-18				C17-19						C17-20						C17-21					C17-59					C17-62			C17-63		C17-64				C17-72						C19-52			C17-68
Spot_#		8	13	22	8	14	15	17	13	15	18	20	26	27	6	7	13	24	25	33	4	5	6	7	9	2	7	11	18	21	15	25	30	27	28	19	20	21	22	5	6	15	24	25	28	21	27	28	12
																																																	Unzoned
SiO2		54.314	52.963	52.915	53.603	51.748	51.248	54.919	54.105	53.339	50.749	56.726	49.011	47.708	53.317	52.715	53.912	48.493	48.306	50.845	49.901	47.49	47.871	49.123	50.303	56.291	53.987	53.41	51.29	54.305	51.689	55.002	55.361	52.126	51.206	56.543	52.761	53.287	51.811	53.267	52.828	55.62	52.912	53.775	54.097	55.2	54.102	54.453	52.768
TiO2		0.025	0.065	0.029	0.052	0.048	0.071	0.052	-	0.042	0.025	0.021	0.004	0.031	-	0.033	-	0.03	0.008	0.012	0.022	0.022	0.031	0.055	0.053	-	0.046	0.044	0.074	-	0.073	0.035	0.04	0.062	0.053	0.034	0.013	0.039	0.035	0.026	-	-	0.014	0.006	-	0.01	-	0.017	0.043
Al2O3		4.753	5.808	6.28	5.795	8.041	8.015	4.384	5.249	5.659	9.143	1.751	10.08	11.405	5.637	6.238	5.111	10.07	10.013	7.908	8.05	10.494	9.947	8.552	7.628	3.394	5.01	6.138	8.366	4.891	7.245	3.855	3.426	7.674	8.638	2.749	6.874	6.16	7.726	5.242	5.539	2.838	6.144	5.407	4.292	3.769	5.056	4.637	6.039
Cr2O3		0.596	0.693	0.511	0.639	0.569	1.119	0.38	0.637	0.629	0.781	0.449	1.239	1.479	0.668	0.609	0.745	1.395	1.258	0.644	1.133	1.445	1.313	1.334	1.035	0.296	0.848	1.147	1.189	0.576	1.311	0.636	0.59	1.186	1.17	0.278	0.961	0.807	0.775	0.85	0.905	0.701	0.786	0.746	0.82	0.557	0.592	0.635	1.166
FeOTotal		2.246	2.567	2.688	2.585	2.993	2.872	2.471	2.616	2.643	3.356	1.884	3.331	3.709	2.718	2.676	2.305	3.063	2.917	2.828	2.771	3.335	3.368	2.847	3.015	1.988	2.177	2.212	2.194	2.339	2.243	2.121	1.991	2.302	2.485	2.177	2.341	2.336	2.641	2.009	2.224	1.831	2.179	2.197	2.036	1.993	2.325	2.218	2.224
MnO		0.028	0.035	0.089	0.077	0.007	0.063	0.018	0.084	-	0.078	0.028	0.061	0.093	0.084	0.065	0.031	0.048	0.022	0.078	0.015	0.087	0.097	0.041	0.084	0.065	0.041	0.052	0.085	0.066	0.057	0.021	0.031	0.039	0.058	0.067	0.052	0.018	0.056	0.084	0.018	0.115	0.065	0.119	0.071	0.019	0.054	0.057	0.054
MgO		22.045	21.1	21.276	21.177	20.797	20.758	22.356	22.04	21.49	20.487	22.959	19.46	19.185	21.604	21.334	21.932	19.324	19.798	20.718	20.146	19.09	19.555	20.236	20.54	22.856	21.787	21.37	20.717	22.012	20.951	22.372	22.546	20.761	20.316	22.709	20.993	21.207	20.72	21.794	21.914	23.078	21.521	22.049	22.344	22.028	21.813	21.82	21.379
CaO		12.787	12.479	12.562	12.545	12.575	12.621	12.701	12.595	12.809	12.407	13.176	12.469	12.5	12.635	12.653	12.869	12.616	12.44	12.566	12.644	12.381	12.316	12.46	12.57	12.593	12.766	12.546	12.52	12.534	12.393	12.637	12.642	12.397	12.691	12.832	12.694	12.724	12.653	12.611	12.406	12.723	12.446	12.482	12.797	12.948	12.763	12.781	12.654
Na2O		0.433	0.703	0.614	0.525	0.803	0.851	0.36	0.819	0.797	1.064	0.321	1.232	1.478	0.626	0.691	0.471	1.196	1.692	0.806	1.182	1.499	1.585	1.234	1.195	0.298	0.522	0.707	0.967	0.56	0.98	0.6	0.49	0.884	0.952	0.307	0.743	0.736	0.955	0.665	0.74	0.342	0.828	0.74	0.526	0.515	0.643	0.557	1.41
K2O		0.003	0.046	0.04	0.015	0.06	0.098	0.006	0.011	0.022	0.116	0.07	0.191	0.274	0.021	0.038	0.03	0.171	0.206	0.079	0.178	0.241	0.184	0.176	0.124	0.009	0.017	0.023	0.057	0.012	0.066	0.008	0.01	0.067	0.077	0.009	0.06	0.053	0.076	0.039	0.022	0.024	0.028	0.019	0.022	0.005	0.028	0.023	0.028
NiO		0.106	0.054	0.121	0.156	0.144	0.139	0.088	0.145	0.063	0.063	0.071	0.122	0.133	0.124	0.06	0.089	0.123	0.098	0.117	0.078	0.185	0.1	0.037	0.058	0.096	0.088	0.083	0.087	0.119	0.054	0.117	0.048	0.111	0.075	0.113	0.107	0.123	0.123	0.128	0.159	0.117	0.177	0.128	0.1	0.162	0.107	0.077	0.138
Total		97.336	96.513	97.125	97.169	97.785	97.855	97.735	98.301	97.493	98.269	97.456	97.2	97.995	97.434	97.112	97.495	96.529	96.758	96.601	96.12	96.269	96.367	96.095	96.605	97.886	97.289	97.732	97.546	97.414	97.062	97.404	97.175	97.609	97.721	97.818	97.599	97.49	97.571	96.715	96.755	97.389	97.1	97.668	97.105	97.206	97.483	97.275	97.903
T site	Si	7.50234	7.37832	7.33524	7.42771	7.15596	7.10744	7.5555	7.43522	7.37973	7.00991	7.81358	6.86472	6.67313	7.37942	7.31246	7.44834	6.83473	6.79104	7.09905	7.02818	6.73076	6.76545	6.9302	7.05397	7.71102	7.47047	7.37805	7.10964	7.49565	7.19409	7.59069	7.64143	7.2192	7.09849	7.76142	7.29984	7.37295	7.17908	7.40358	7.34698	7.667	7.33648	7.41539	7.49145	7.62905	7.47095	7.52668	7.30123
	Al	0.480956	0.609082	0.657199	0.55742	0.838104	0.879392	0.428191	0.546445	0.604633	0.984498	0.154844	1.12904	1.32035	0.608596	0.678913	0.533626	1.16063	1.20575	0.903394	0.964585	1.26893	1.23691	1.06599	0.941146	0.266422	0.5087	0.596753	0.875677	0.488311	0.787886	0.386838	0.335829	0.760023	0.884796	0.213276	0.680534	0.606836	0.809428	0.581892	0.641731	0.310199	0.650611	0.568577	0.490853	0.346864	0.51131	0.452889	0.67313
	Ti	0.00259749	0.00681126	0.00302387	0.00541999	0.00499281	0.00740669	0.00538113	0	0.00437094	0.00259749	0.00217579	0.000421423	0.00326159	0	0.00344328	0	0.00318048	0.000845969	0.00126027	0.0023307	0.00234538	0.00329546	0.0058365	0.00559043	0	0.00478791	0.00457195	0.00771571	0	0.0076424	0.00363329	0.00415298	0.00645886	0.0055265	0.00351051	0.00135292	0.00405895	0.00364791	0.00271823	0	0	0.00146013	0.000622349	0	0.00103959	0	0.0017675	0.00447531
	Sum	7.98589	7.99421	7.99547	7.99055	7.99906	7.99424	7.98908	7.98166	7.98874	7.997	7.9706	7.99418	7.99674	7.98801	7.99481	7.98196	7.99855	7.99763	8.00371	7.99509	8.00204	8.00566	8.00202	8.00071	7.97744	7.98396	7.97938	7.99303	7.98396	7.98961	7.98116	7.98141	7.98568	7.98881	7.97821	7.98173	7.98385	7.99216	7.98819	7.98871	7.9772	7.98855	7.98459	7.98231	7.97695	7.98226	7.98134	7.97884
C site	Al	0.292808	0.34452	0.36881	0.388981	0.472407	0.430682	0.282641	0.303692	0.318133	0.503936	0.129413	0.534927	0.559782	0.310923	0.340923	0.29859	0.512105	0.453285	0.397898	0.371657	0.483972	0.419897	0.355959	0.31954	0.281528	0.308357	0.402561	0.491072	0.307341	0.400539	0.240184	0.221503	0.492578	0.526487	0.23145	0.440363	0.39768	0.452276	0.276799	0.266157	0.150866	0.353406	0.310173	0.209647	0.267058	0.311549	0.302508	0.311666
	Fe3+	0.00317415	0.00581583	0.0594863	0.00303825	0.0428694	0.0107088	0.0372229	0.0491569	0.00189067	0.0820422	0	0.0151754	0.041411	0.0505098	0.0483845	0	0	0.0332613	0.0864364	0	0.0398952	0.0838898	0.0351615	0.0626976	0.0275977	0	0	0	0.0322421	0	0	0	0	0	0.00885249	0	0	0.00749393	0.0131855	0.0335705	0.0348938	0.019793	0.0478596	0.0164324	0	0.00646021	0	0
	Cr	0.0650888	0.0763296	0.0560056	0.070007	0.0622102	0.122699	0.0413332	0.0692103	0.0688052	0.0852925	0.0488978	0.137207	0.163562	0.0730984	0.0667915	0.0813776	0.15545	0.139827	0.0710907	0.126165	0.161921	0.146711	0.148796	0.114751	0.0320582	0.0927747	0.125273	0.130308	0.0628589	0.144263	0.069396	0.0643869	0.129866	0.128235	0.0301705	0.105123	0.0882812	0.0849031	0.0934065	0.0995104	0.0763989	0.086165	0.081333	0.0897804	0.0608641	0.0646337	0.0693953	0.127555
	Ni	0.0117782	0.00605153	0.013493	0.0173891	0.0160186	0.0155074	0.00973891	0.0160292	0.0070117	0.00700023	0.00786707	0.013746	0.014965	0.0138059	0.00669526	0.00989124	0.0139455	0.0110828	0.0131409	0.00883721	0.0210921	0.0113687	0.00419903	0.00654267	0.0105787	0.00979554	0.00922325	0.0097011	0.0132131	0.00604586	0.012989	0.00532965	0.0123664	0.0083636	0.0124775	0.0119089	0.0136903	0.01371	0.0143113	0.0177881	0.0129738	0.0197421	0.0141988	0.0111399	0.0180108	0.0118859	0.00856169	0.01536
	Mg	4.53945	4.38203	4.39678	4.3746	4.2873	4.29171	4.58504	4.51519	4.43242	4.21863	4.71443	4.06331	3.99083	4.45758	4.41174	4.51711	4.05758	4.14921	4.31229	4.22991	4.01726	4.10842	4.24818	4.29387	4.66747	4.49433	4.40081	4.28105	4.52937	4.34701	4.60273	4.63926	4.28639	4.19848	4.64696	4.32995	4.37429	4.28001	4.51574	4.54334	4.74243	4.44841	4.53264	4.61278	4.53853	4.49042	4.49619	4.40982
	Fe2+	0.157463	0.225774	0.145946	0.20809	0.165023	0.204978	0.115055	0.129207	0.222138	0.148366	0.217355	0.293164	0.287476	0.159597	0.163606	0.176324	0.325801	0.250532	0.140805	0.300436	0.313786	0.254554	0.244624	0.232483	0.0678723	0.201786	0.221283	0.175344	0.128146	0.211077	0.161994	0.146553	0.223014	0.253575	0.14931	0.231353	0.239083	0.205322	0.147984	0.122315	0.0780688	0.138184	0.0881114	0.136975	0.237567	0.177592	0.201769	0.25443
	Sum	5.06977	5.04052	5.04052	5.06211	5.04583	5.07629	5.07103	5.08249	5.0504	5.04527	5.11796	5.05753	5.05803	5.06551	5.03814	5.08329	5.06488	5.03719	5.02167	5.037	5.03792	5.02484	5.03692	5.02988	5.0871	5.10704	5.15915	5.08748	5.07317	5.10894	5.0873	5.07703	5.14421	5.11514	5.07922	5.1187	5.11303	5.04372	5.06143	5.08268	5.09563	5.0657	5.07431	5.07675	5.12203	5.06254	5.07843	5.11884
B site	Mn2+	0.00327588	0.00412988	0.0104499	0.00903736	0.000819894	0.00740052	0.00209748	0.00977734	0	0.00912567	0.00326671	0.00723676	0.0110181	0.00984738	0.00763708	0.00362761	0.00573019	0.00261965	0.00922427	0.00178941	0.010444	0.0116113	0.00489925	0.0099771	0.00754173	0.00480538	0.00608426	0.00997973	0.00771611	0.00671951	0.00245475	0.00362424	0.00457493	0.00681017	0.00778973	0.00609381	0.00210949	0.00657234	0.0098889	0.00212033	0.0134269	0.00763365	0.0138991	0.00832791	0.00222418	0.00631599	0.00667332	0.00632855
	Fe2+	0.0988113	0.0674763	0.106184	0.0884306	0.138236	0.117415	0.132017	0.122278	0.0817791	0.157262	0	0.0818354	0.104974	0.104495	0.0984448	0.0899941	0.0352312	0.0591537	0.102966	0.0259459	0.0416067	0.0596198	0.0561095	0.0583963	0.132273	0.0501403	0.0342578	0.0789918	0.109607	0.0499966	0.0827991	0.083272	0.0436077	0.0345149	0.0917439	0.0395145	0.0312191	0.0932192	0.0723481	0.102778	0.0981133	0.0946888	0.11739	0.082383	0	0.0844457	0.0546198	0.0029156
	Mg	0	0	0	0	0	0	0	0	0	0	0	0	0.00961308	0	0	0	0.00262468	0	0	0	0.0161878	0.0115167	0.00774558	0	0	0	0	0	0	0	0	0	0	0	0	0	0	0	0	0	0	0	0	0	0	0	0	0
	Ca	1.89977	1.86951	1.87334	1.86799	1.87097	1.87972	1.87905	1.85923	1.90763	1.84145	1.95398	1.87554	1.87623	1.88037	1.8887	1.91214	1.90946	1.87974	1.88893	1.91545	1.88338	1.86954	1.88854	1.89599	1.85193	1.89831	1.85813	1.86216	1.85891	1.8499	1.87416	1.8752	1.84065	1.889	1.89359	1.88635	1.89233	1.88547	1.88416	1.85399	1.88369	1.85417	1.84791	1.90552	1.92587	1.89571	1.89971	1.88036
	Na	0.0384271	0.0840612	0.0428178	0.0707998	0.0108755	0	0.0283363	0.0540364	0.0556816	0	0.0958064	0.0244835	0	0.032626	0.0347116	0.0230711	0.017874	0.0521736	0.00772595	0.0577729	0.0356854	0.0318456	0.0199676	0.0373616	0.0741804	0.0510261	0.0619425	0.0357053	0.0616005	0.0570306	0.0820267	0.0832264	0.063982	0.0386245	0.0890821	0.0584186	0.0740164	0.0521965	0.0601768	0.0367343	0.0462317	0.0703554	0.0552527	0.0342493	0.103861	0.0678901	0.0797701	0.118468
	Sum	2.04029	2.02518	2.0328	2.03626	2.0209	2.00454	2.0415	2.04532	2.04509	2.00783	2.05305	1.9891	2.00184	2.02734	2.02949	2.02883	1.97092	1.99368	2.00885	2.00096	1.98731	1.98413	1.97726	2.00173	2.06593	2.00428	1.96042	1.98684	2.03783	1.96365	2.04144	2.04532	1.95281	1.96895	2.08221	1.99038	1.99968	2.03746	2.02657	1.99562	2.04146	2.02684	2.03445	2.03048	2.03195	2.05436	2.04077	2.00807
A site	Na	0.0775359	0.105822	0.122208	0.0702497	0.204421	0.22883	0.0676899	0.16418	0.158115	0.284953	0	0.310086	0.400829	0.135362	0.151135	0.103095	0.308955	0.409019	0.210463	0.265	0.376232	0.402465	0.31757	0.287542	0.00496681	0.0890215	0.127416	0.224184	0.0882658	0.207423	0.0785196	0.0479069	0.173392	0.217251	0	0.140894	0.123428	0.204368	0.119029	0.162803	0.0451726	0.152237	0.142595	0.10698	0.0341408	0.104265	0.0695036	0.259793
	K	0	0	0	0	0	0.00765279	0	0	0	0.00910468	0	0.0288381	0.0461417	0	0	0	0.0273049	0.0324659	0.00417424	0.0261567	0.0428692	0.0310958	0.0284042	0.015233	0	0	0	0	0	0.00295666	0	0	0.000785036	0.00304651	0	0	0	0.000732315	0	0	0	0	0	0	0	0	0	0
	Sum	0.0775359	0.105822	0.122208	0.0702497	0.204421	0.236483	0.0676899	0.16418	0.158115	0.294057	0	0.338924	0.446971	0.135362	0.151135	0.103095	0.33626	0.441485	0.214638	0.291157	0.419101	0.43356	0.345974	0.302775	0.00496681	0.0890215	0.127416	0.224184	0.0882658	0.21038	0.0785196	0.0479069	0.174177	0.220297	0	0.140894	0.123428	0.2051	0.119029	0.162803	0.0451726	0.152237	0.142595	0.10698	0.0341408	0.104265	0.0695036	0.259793
Mg/(Mg+Fe2+)		0.945936	0.936112	0.933817	0.935912	0.925298	0.927975	0.941615	0.937572	0.935459	0.915839	0.955928	0.912389	0.902158	0.934076	0.93426	0.944325	0.918341	0.923656	0.928873	0.928367	0.910745	0.911894	0.926849	0.92392	0.953476	0.946921	0.94512	0.943922	0.943744	0.943344	0.949501	0.952799	0.94144	0.935788	0.948966	0.941126	0.941803	0.933268	0.950831	0.946134	0.957389	0.946254	0.947062	0.951369	0.950259	0.94358	0.946053	0.944861
Mg#		94.5937	93.6113	93.3818	93.5913	92.5299	92.7976	94.1616	93.7573	93.5461	91.5841	95.5993	91.239	90.216	93.4077	93.4261	94.4326	91.8343	92.3658	92.8874	92.8368	91.0746	91.1896	92.6851	92.3922	95.3477	94.6922	94.5121	94.3923	94.3745	94.3346	94.9502	95.28	94.1442	93.579	94.8967	94.1127	94.1804	93.3269	95.0832	94.6135	95.7389	94.6255	94.7063	95.137	95.1697	94.3581	94.6054	94.4862
Part V Spinels
Sample	C17-17												C17-18											C17-19																C17-20
Spot_#	5	12	14	19	23	28	29	30	31	32	33	34	4	6	11	21	22	24	25	26	27	28	29	2	10	24	28	29	31	32	34	35	36	37	38	39	40	41	42	2	3	4	10	17	18	19	22	23	30
	Inter.	Inter.	Inter.	Inter.	Inter.	Inclu.	Inclu.	Inclu.	Inclu.	Inter.	Inclu.	Inclu.	Inclu.	Inter.	Inter.	Inter.	Inter.	Inclu.	Inclu.	Inclu.	Inclu.	Inclu.	Inclu.	Inter.	Inter.	Inter.	Inclu.	Inclu.	Inclu.	Inclu.	Inter.	Inclu.	Inclu.	Inclu.	Inclu.	Inclu.	Inclu.	Inclu.	Inclu.	Inter.	Inter.	Inter.	Inter.	Inclu.	Inclu.	Inclu.	Inclu.	Inclu.	Inter.
SiO2	-	0.004	-	0.009	0.022	-	-	-	-	-	-	-	0.027	0.009	0.03	-	0.032	-	-	-	-	-	-	-	0.002	-	-	0.017	0.019	-	0.036	-	0.035	-	-	-	-	-	-	0.025	0.023	0.047	0.036	0.036	0.056	0.029	0.048	0.073	0.023
MgO	13.431	14.063	14.122	13.27	12.844	14.841	14.795	14.861	14.71	13.438	14.933	12.934	14.018	13.532	12.934	13.517	13.712	12.499	13.288	14.342	14.622	14.538	13.858	12.765	13.385	12.732	10.165	8.288	11.618	8.858	12.384	13.114	10.5	12.943	11.167	11.273	12.867	13.135	13.045	14.023	14.338	14.13	13.665	13.772	13.771	12.617	14.48	14.766	12.727
TiO2	0.066	0.019	0.041	0.013	0.041	0.011	-	0.041	-	0.024	0.03	0.037	0.068	0.007	0.037	-	-	0.034	-	0.008	0.029	0.004	0.033	-	-	0.054	0.021	0.056	0.016	0.059	0.039	0.056	0.005	0.049	-	-	-	0.005	0.018	-	0.002	-	-	0.041	0.032	-	0.018	0.02	-
V2O3	0.081	0.181	0.111	0.339	0.316	0.19	0.176	0.159	0.18	0.189	0.199	0.205	0.3	0.174	0.259	0.245	0.095	0.148	0.17	0.195	0.203	0.205	0.215	0.109	0.057	0.16	0.355	0.268	0.264	0.361	0.21	0.273	0.448	0.224	0.263	0.198	0.213	0.202	0.191	0.191	0.08	0.243	0.243	0.175	0.256	0.347	0.271	0.205	0.299
Al2O3	33.538	35.746	35.086	35.822	34.611	37.951	37.419	39.164	37.604	37.408	38.114	35.903	35.9	37.464	35.849	35.091	36.106	28.376	32.485	37.963	38.391	38.401	35.568	36.443	36.182	35.978	17.177	12.55	24.917	15.943	34.642	29.773	20.248	29.207	24.456	24.525	29.791	29.101	29.79	35.617	36.507	35.426	35.349	34.56	35.348	27.226	35.757	36.799	35.224
NiO	0.183	0.198	0.252	0.156	0.165	0.24	0.233	0.217	0.274	0.135	0.294	0.154	0.191	0.201	0.137	0.129	0.149	0.173	0.188	0.203	0.172	0.193	0.239	0.146	0.184	0.174	0.19	0.128	0.18	0.092	0.14	0.146	0.152	0.202	0.2	0.159	0.178	0.233	0.18	0.134	0.278	0.213	0.189	0.173	0.177	0.132	0.159	0.248	0.199
Cr2O3	30.857	29.226	28.667	28.224	28.198	25.607	25.768	24.769	25.983	26.363	25.26	27.005	28.803	27.207	28.541	28.883	28.446	34.822	30.561	26.415	25.594	25.912	27.722	27.685	27.748	27.972	43.812	47.317	38.29	46.984	28.834	34.378	42.591	33.352	36.773	36.783	32.586	33.921	32.775	28.758	28.553	27.046	28.855	30.047	28.874	36.863	28.137	27.893	28.187
ZnO	0.243	0.245	0.177	0.303	0.5	0.186	0.146	0.188	0.206	0.29	0.153	0.339	0.259	0.443	0.411	0.413	0.402	0.136	0.189	0.278	0.256	0.252	0.133	0.341	0.313	0.249	0.188	0.135	0.092	0.164	0.315	0.219	0.249	0.198	0.118	0.168	0.224	0.129	0.099	0.191	0.19	0.106	0.264	0.296	0.156	0.251	0.213	0.174	0.349
MnO	0.284	0.249	0.23	0.277	0.224	0.226	0.225	0.219	0.216	0.265	0.241	0.23	0.268	0.2	0.237	0.218	0.269	0.241	0.257	0.253	0.232	0.222	0.2	0.216	0.228	0.33	0.319	0.35	0.198	0.476	0.218	0.274	0.322	0.242	0.354	0.332	0.244	0.259	0.299	0.232	0.226	0.257	0.285	0.225	0.243	0.178	0.237	0.24	0.259
CaO	0.016	0.011	0.002	0.018	0.026	-	0.007	-	-	-	0.004	-	0.007	0.004	0.097	-	0.018	-	-	-	-	0.021	0.014	0.01	-	0.006	0.019	0.004	-	-	0.006	-	-	-	-	-	-	-	0.005	0.017	0.013	0.01	0.013	0.019	0.019	0.015	0.032	0.044	0.018
FeOTotal	22.12	20.846	21.799	21.679	23.121	19.809	20.044	19.777	20.567	22.097	20.257	22.011	20.902	21.339	22.078	22.106	21.833	22.637	20.96	20.183	19.61	19.364	20.845	21.62	22.712	22.371	25.887	30.539	24.178	27.842	23.288	22.542	25.723	22.252	25.22	24.992	22.618	23.017	23.083	20.766	20.69	20.523	21.512	21.153	20.949	22.488	19.711	19.334	22.863
CoO		0.076	0.079	0.123	0.233	0.083	0.084	0.088	0.109	0.088	0.091	0.111	-	0.105	0.069	0.098	0.128	0.096	0.098	0.073	0.048	0.115	0.081	0.104	0.008	0.072	0.068	0.066	0.054	0.081	0.141	0.052	0.097	0.084	0.076	0.059	0.103	0.116	0.071	0.075	0.019	-	0.02	0.05	0.07	0.077	0.064	0.042	0.076
Total	100.819	100.864	100.566	100.233	100.301	99.144	98.897	99.483	99.849	100.297	99.576	98.929	100.743	100.685	100.679	100.7	101.19	99.162	98.196	99.913	99.157	99.227	98.908	99.439	100.819	100.098	98.201	99.718	99.826	100.86	100.253	100.827	100.37	98.753	98.627	98.489	98.824	100.118	99.556	100.029	100.919	98.001	100.431	100.547	99.951	100.223	99.127	99.838	100.224
Cr#	38.1635	35.4188	35.4034	34.5769	35.3379	31.1583	31.5972	29.7869	31.6702	32.0991	30.775	33.5347	34.9882	32.7568	34.8129	35.572	34.5755	45.1504	38.6902	31.8217	30.9007	31.1594	34.3323	33.7566	33.9685	34.2763	63.1123	71.6639	50.7584	66.4071	35.8286	43.6474	58.5232	43.3744	50.2147	50.1511	42.3207	43.8799	42.4627	35.1328	34.4108	33.8674	35.3821	36.8366	35.3978	47.5953	34.5482	33.7066	34.9289
Mg#	51.9783	54.5988	53.5928	52.1799	49.7556	57.1836	56.8185	57.2562	56.0435	52.0173	56.7869	51.16	54.4529	53.0614	51.084	52.1534	52.8205	49.6038	53.0546	55.8837	57.0668	57.2349	54.2358	51.2792	51.233	50.3611	41.1759	32.605	46.1378	36.1898	48.6642	50.9097	42.1183	50.9052	44.1128	44.5701	50.3502	50.4284	50.185	54.6235	55.2642	55.1033	53.1039	53.7168	53.9558	50.0038	56.7015	57.6532	49.8074
Notes: (1) Mg# = 100 × MgO/(MgO + FeOTotal) and Cr# =100 × Cr2O3/(Cr2O3 + Al2O3) (molar ratios); (2) The formulae of amphiboles are calculated using a machine learning method on the basis of principle components regression (Li et al., 2020); (3) The bold italic analyses were measured in Wuhan Sample Solution Analytical Technology Co., LTD. and others in the Key Laboratory of Submarine Geosciences…
[truncated: 120 more columns]

## Sheet: Table S5
Table S5 Clinopyroxene and orthopyroxene trace-element compositions (ppm) of peridotites from the Chagan-Uzun ophiolite
	C17-17 (n = 9)		C17-18 (n = 7)		C17-19 (n = 5)		C17-21 (n = 10)		C17-17 (n = 11)		C17-18 (n = 7)		C17-19 (n = 11)		C17-21 (n = 11)		C17-59 (n = 8)		C17-62 (n = 8)		C17-68 (n = 9)		SRM612				BIR-1G				BCR-2G				BHVO-2G				C17-59 (n = 5)		C19-63 (n = 5)		C19-64 (n = 5)		C19-63 (n = 6)		C19-64 (n = 8)		SRM610
	Clinopyroxene		Clinopyroxene		Clinopyroxene		Clinopyroxene		Orthopyroxene		Orthopyroxene		Orthopyroxene		Orthopyroxene		Orthopyroxene		Orthopyroxene		Orthopyroxene		Measured value (n = 21)		Recommended value	Relative deviation	Measured value (n = 21)		Recommended value	Relative deviation	Measured value (n = 21)		Recommended value	Relative deviation	Measured value (n = 21)		Recommended value	Relative deviation	Clinopyroxene		Clinopyroxene		Clinopyroxene		Orthopyroxene		Orthopyroxene		Measured value (n = 22)
	Average	1 sigma	Average	1 sigma	Average	1 sigma	Average	1 sigma	Average	1 sigma	Average	1 sigma	Average	1 sigma	Average	1 sigma	Average	1 sigma	Average	1 sigma	Average	1 sigma	Average	1 sigma			Average	1 sigma			Average	1 sigma			Average	1 sigma			Average	1 sigma	Average	1 sigma	Average	1 sigma	Average	1 sigma	Average	1 sigma	Average
	Measured in GPMR-CUGW																																						Measured in Wuhan Sample Solution Analytical Technology Co., LTD
B	6.61541	1.48854	4.68233	0.735774	5.52403	0.537839	5.64353	1.11952	6.07077	0.987771	3.24036	0.527403	3.81469	0.324562	4.51723	1.19479	3.4201	0.312701	3.08316	0.555567	3.6477	0.258853	30.6051	2.86418	35	-0.125569	3.23117	0.35213	n.p.		6.02863	0.462718	6	0.00477228	4.56562	0.275058	n.p.		1.64615	0.688697	1.12021	0.297464	1.47513	0.723707	1.09031	0.206876	0.832726	0.354466	460.975
Li	5.80631	1.57774	9.5278	2.13225	12.0853	3.76971	7.68725	1.71983	2.25993	0.887496	3.56679	1.3413	2.79833	0.47488	2.62933	0.613368	1.12427	0.355619	1.68403	0.622095	2.33165	0.658415	40.0884	0.457092	42	-0.0455144	3.01866	0.0977174	3	0.00621891	9.05642	0.180688	9	0.00626913	4.36839	0.0910491	4.4	-0.00718334	8.90784	1.58793	2.79965	0.257111	3.43897	0.404313	0.718323	0.167595	0.779199	0.144954	465.516
Rb	0.0238374	0.0157275	0.0262826	0.00865862	0.0253574	0.0126218	0.0223494	0.0190556	0.0303184	0.0283722	0.020644	0.0191739	0.0221817	0.0187977	0.0310291	0.0155904	0.0778696	0.0797017	0.0283089	0.0219317	0.0494402	0.0648938	31.6598	0.316105	31.4	0.00827529	0.196721	0.0169414	0.197	-0.00141876	47.1733	0.604215	47	0.00368721	9.09454	0.153311	9.2	-0.0114628	0.0119186	0.00440205	0.00865262	0.00482048	0.026581	0.0313941	0.0326934	0.018417	0.0186394	0.0115155	428.502
Ba	0.516698	0.431796	1.70642	0.696086	2.41151	1.81894	1.84637	1.11791	0.669134	0.73848	0.790675	0.720985	0.821958	0.8752	1.90652	1.45113	0.675865	0.613155	0.233704	0.146782	0.329278	0.391926	41.002	0.334362	39.7	0.032795	6.50783	0.281252	6.5	0.0012048	683.291	8.01476	683	0.00042607	131.392	1.80134	131	0.00298984	0.269698	0.0526747	0.766402	0.940471	0.229034	0.0830993	0.285919	0.258482	0.214547	0.190655	462.326
Th	0.0134214	0.00696234	0.00481646	0.0014371	0.00136716	0.000491349	0.016651	0.00273353	0.00310311	0.00160134	0.00232324	0.000588488	0.000932353	0.000367533	0.0042765	0.00238238	0.000817935	0.000395784	0.0023877	0.00195661	0.00226595	0.00189738	38.7014	1.07479	37.79	0.0241173	0.0306245	0.00264021	0.03	0.0208169	5.92107	0.0932612	5.9	0.00357169	1.20836	0.0281806	1.22	-0.00954479	0.000934948	0.000423335	0.00290531	0.000472901	0.00128163	0.000866105	-	-	0.000738575	-	490.734
U	0.00714479	0.00236814	0.00189718	0.000678445	0.00456912	0.00149365	0.0140737	0.00349075	0.00277555	0.00118963	-	-	0.00134866	0.000447683	0.00253905	0.00141874	0.00130969	0.00078461	-	-	0.00121425	0.000483353	37.7408	0.496362	37.38	0.00965193	0.0165601	0.00536219	0.023	-0.279996	1.69031	0.0315416	1.69	0.000185509	0.415679	0.0137201	0.403	0.0314623	0.00178197	0.00128564	0.00186284	0.000625888	0.00107812	0.000534869	0.00055982	-	-	-	457.181
Nb	0.0105518	0.00336316	0.00702428	0.00345396	0.00380199	0.00225647	0.0813377	0.0140903	0.0214985	0.0200299	0.00401762	0.00269105	0.00724354	0.00398526	0.0306708	0.02122	0.00265115	0.00128656	0.00378209	0.00388798	0.00326855	0.000996096	41.968	0.425158	40	0.0491992	0.540742	0.0192142	0.52	0.0398879	12.5599	0.164385	12.5	0.00479254	18.3773	0.235454	18.3	0.00422406	-	-	0.00442215	0.00263967	0.00646026	-	0.00529269	0.00417056	0.00307525	3.62097e-05	522.257
Ta	0.0016285	0.000523831	0.00158537	0.000450037	-	-	0.00747817	0.00097911	0.0018969	0.00130025	-	-	-	-	0.00127357	0.000403801	-	-	-	-	-	-	41.3045	1.11163	40	0.0326135	0.0371143	0.00461932	0.036	0.0309518	0.783622	0.0157188	0.78	0.00464307	1.15607	0.0217363	1.15	0.00527849	-	-	0.00109622	0.000589574	-	-	0.000845518	-	-	-	518.552
La	0.337866	0.0947479	0.100053	0.0238643	0.0260385	0.0064318	0.267166	0.0323565	-	-	-	-	-	-	-	-	-	-	0.00233919	0.00088164	-	-	37.2549	0.415608	35.8	0.040639	0.586938	0.0243273	0.609	-0.0362266	24.938	0.304784	24.7	0.00963664	15.1293	0.229747	15.2	-0.00465409	0.0602553	0.00955791	0.138351	0.0110528	0.0444265	0.00616105	-	-	-	-	467.839
Ce	0.882868	0.222626	0.30353	0.0599008	0.0322229	0.00700212	0.463766	0.0598387	-	-	-	-	-	-	-	-	-	-	0.00272774	0.00138538	-	-	40.7387	0.306558	38.7	0.0526805	1.90742	0.0387031	1.89	0.00921711	53.4343	0.739192	53.3	0.00251991	37.7553	0.544848	37.6	0.00412915	0.158637	0.0209087	0.427991	0.0312435	0.128368	0.0151337	-	-	-	-	482.976
Pb	0.374011	0.0360878	0.375957	0.0482518	0.35848	0.0401909	0.423498	0.0229557	0.0100177	0.00437451	0.00740618	0.0021465	0.00823468	0.00472607	0.0105178	0.0033963	0.00983877	0.00295635	0.00870151	0.00269017	0.00741694	0.00319354	39.1771	1.14949	39.77	-0.0149072	3.54825	0.09269	3.7	-0.0410147	11.1091	0.220747	11	0.00991604	1.78116	0.040446	1.7	0.0477395	0.134646	0.0117788	0.1954	0.014993	0.199142	0.010465	0.0253594	0.00520321	0.0166927	0.00460129	439.625
Pr	0.110436	0.0313909	0.0480676	0.00867369	0.00336874	0.00138373	0.0448131	0.00710876	-	-	-	-	-	-	-	-	-	-	-	-	-	-	40.4443	0.436287	37.2	0.0872131	0.370259	0.0126777	0.37	0.000700446	6.79002	0.0944093	6.7	0.0134352	5.31289	0.0690787	5.35	-0.00693615	0.0196659	0.00279552	0.0705129	0.00903498	0.0198239	0.00279826	-	-	-	-	485.002
Sr	34.3059	3.68923	21.3778	6.07839	14.9122	1.74341	17.8859	6.834	0.393728	0.468795	0.511476	0.417968	0.484558	0.495526	1.05672	0.693385	1.61971	1.43156	0.177172	0.172667	0.2284	0.302282	81.2958	0.752168	78.4	0.0369365	108.856	1.49077	109	-0.00131887	342.297	3.93063	342	0.000868272	399.13	5.09699	396	0.0079046	6.7947	0.829356	14.181	1.01673	10.1067	0.594604	0.186353	0.130894	0.121264	0.136283	545.107
Nd	0.395778	0.132303	0.206517	0.0461711	0.0225056	0.00886734	0.147088	0.0210468	-	-	-	-	-	-	-	-	-	-	-	-	-	-	37.8424	0.631703	35.9	0.0541071	2.38268	0.0726807	2.37	0.00534851	28.9612	0.502472	28.9	0.00211864	24.634	0.366806	24.5	0.00546784	0.0831732	0.0108879	0.351692	0.0580943	0.103835	0.0216841	-	-	-	-	473.515
Zr	1.41391	0.2058	0.738252	0.116714	0.0867191	0.0152812	0.341278	0.0338022	0.137537	0.0294923	0.0704241	0.027951	0.00654708	0.00410647	0.0185138	0.00823905	0.0140358	0.00624917	0.0297342	0.0192815	0.0381175	0.0169532	40.4075	1.10808	38	0.0633559	14.336	0.368123	14	0.0239989	184.922	2.97021	184	0.00500984	170.248	3.34099	170	0.00146173	0.215004	0.0483207	0.608019	0.0783507	0.334267	0.0538079	0.0629074	0.0182925	0.0182926	0.0107485	498.059
Hf	0.0298409	0.00738315	0.0224298	0.0075639	0.00561626	0.00283126	0.00432716	0.00139762	0.004766	0.00190766	0.0033674	0.000414998	-	-	-	-	-	-	-	-	0.00246063	0.0010811	37.2048	1.30733	35	0.062995	0.54878	0.128101	0.57	-0.0372284	4.8087	0.0975675	4.84	-0.0064671	4.38059	0.101529	4.32	0.0140263	0.00675075	0.0014747	0.025266	0.00321715	0.0114949	0.00205453	0.00244385	0.000921569	0.00171988	0.000785686	477.944
Sm	0.0785549	0.0361289	0.0541899	0.0185152	0.0123952	0.00492427	0.0196535	0.00720174	-	-	-	-	-	-	-	-	-	-	-	-	-	-	39.4036	0.573676	38.1	0.034216	1.10816	0.060095	1.09	0.0166579	6.63043	0.156867	6.59	0.00613559	6.10093	0.131804	6.1	0.000152645	0.0122552	0.00218401	0.0663786	0.0104069	0.0257405	0.00352982	-	-	-	-	492.136
Eu	0.0185556	0.00699195	0.0150432	0.0017116	0.00542196	0.00235377	0.0155388	0.00365705	-	-	-	-	-	-	-	-	-	-	-	-	-	-	37.1989	0.649715	35	0.0628258	0.52174	0.0243403	0.517	0.00916791	1.98195	0.040474	1.97	0.00606747	2.07316	0.0385718	2.07	0.00152717	0.0149189	0.0023767	0.0161912	0.00244138	0.0115435	0.00223259	-	-	-	-	483.693
Ti	118.964	13.6335	114.021	8.72235	72.0312	4.09098	69.6573	2.8391	58.1631	3.71008	52.88	3.21403	36.3361	1.96691	36.2487	0.878226	49.9626	2.58718	51.47	2.9439	50.378	2.79265	49.6265	1.65567	45.8334	0.0827569	5702.95	137.912	5399.43	0.0562145	13659.6	274.696	14098.5	-0.0311338	16556.8	320.796	16298.3	0.0158649	76.2941	8.9409	66.399	3.31247	75.5584	6.73583	37.0796	2.21923	41.623	2.89108	481.309
Gd	0.0672207	0.0384516	0.0635378	0.0194578	0.0281399	0.0094945	0.0292613	0.0066305	-	-	-	-	-	-	-	-	-	-	-	-	-	-	39.1568	0.903293	36.7	0.066942	1.82901	0.078186	1.85	-0.0113445	6.71886	0.157226	6.71	0.00132054	6.23273	0.162399	6.16	0.0118068	0.0140253	0.00291758	0.0586792	0.0120118	0.032279	0.00566895	-	-	-	-	488.846
Tb	0.014027	0.00633327	0.013686	0.00402916	0.00865806	0.00304646	0.00979993	0.00223057	-	-	-	-	-	-	-	-	-	-	-	-	-	-	39.1945	1.06238	36	0.0887361	0.353928	0.01154	0.35	0.0112232	1.0286	0.0157184	1.02	0.00843523	0.916559	0.0246617	0.92	-0.00373969	0.00261757	0.000764368	0.00919355	0.000928653	0.0065747	0.00100023	-	-	-	-	489.924
Dy	0.115283	0.0559601	0.158095	0.0344999	0.10062	0.0340172	0.120153	0.01879	0.00556897	0.00138691	0.00654989	0.0026136	0.00599344	0.00142423	-	-	-	-	-	-	-	-	37.3944	1.00693	36	0.0387334	2.57221	0.0895028	2.55	0.00870866	6.42062	0.141665	6.44	-0.00300992	5.32374	0.129984	5.28	0.00828462	0.0361955	0.0106886	0.0593803	0.00578798	0.0614826	0.0114539	0.0032068	0.00186618	0.00269559	2.89472e-05	488.302
Y	0.785541	0.364058	1.23799	0.283662	0.867406	0.238442	1.03588	0.141086	0.0374063	0.0174957	0.0960879	0.0606734	0.0309495	0.0231701	0.0331828	0.016119	0.0117635	0.00563695	0.0147602	0.00679923	0.0199735	0.00886511	41.4444	1.14565	38	0.090643	15.2388	0.357994	14.3	0.0656499	34.7563	0.513834	35	-0.00696187	25.5395	0.47043	26	-0.0177112	0.351093	0.0497591	0.41497	0.0641056	0.445786	0.0663636	0.0243148	0.0083208	0.0139203	0.00685077	532.599
Ho	0.0300997	0.0129357	0.0472084	0.0127552	0.0311549	0.0102253	0.0389677	0.00432495	0.00203491	0.000742437	0.00314597	0.00187645	0.00148914	0.000828994	0.00119638	0.000428169	-	-	0.000693627	0.000110499	0.00103778	0.000337816	39.4452	1.2035	38	0.0380322	0.568781	0.0197634	0.56	0.015681	1.2791	0.0270569	1.27	0.00716225	0.972233	0.0244758	0.98	-0.00792527	0.0122911	0.00240857	0.0154041	0.00208033	0.016123	0.00351079	0.0008379	0.000627705	0.00086305	0.000157693	495.812
Er	0.10749	0.0435683	0.174474	0.0379974	0.127396	0.0367748	0.156412	0.0229684	0.00939014	0.00370079	0.0149489	0.00905454	0.00798636	0.00553743	0.00698589	0.00321993	0.00301515	0.00246921	0.00375537	0.00133664	0.00403429	0.00132458	39.8325	1.30657	38	0.0482229	1.71369	0.0549237	1.7	0.00805007	3.7066	0.0848475	3.7	0.00178343	2.5642	0.0660101	2.56	0.00164116	0.0584895	0.0119553	0.0613048	0.00656151	0.0627941	0.00974915	0.0052108	0.00191272	0.00361436	0.00122984	511.568
Tm	0.0201247	0.0091294	0.032651	0.00663556	0.024043	0.00407144	0.0288382	0.0040936	0.00262805	0.00095545	0.00430934	0.00248471	0.00207982	0.00115489	0.00244832	0.000731274	0.00105493	0.000719686	0.00106786	0.000364607	0.00167021	0.000586284	39.0517	1.43005	38	0.0276771	0.250059	0.00828996	0.24	0.0419126	0.511744	0.0144261	0.51	0.00341871	0.332116	0.010255	0.34	-0.0231893	0.0109897	0.00131869	0.0100704	0.00168076	0.0130652	0.00243773	0.00151094	0.000710712	0.0010581	0.000539476	485.84
Yb	0.160896	0.0528839	0.265732	0.0430572	0.203576	0.0504546	0.238116	0.0319669	0.0299433	0.0090921	0.0531364	0.0239706	0.02745	0.0100167	0.0319173	0.00691827	0.0164314	0.00791358	0.0130509	0.00587217	0.0145568	0.00385803	40.3748	1.42609	39.2	0.0299703	1.66303	0.0498583	1.64	0.0140406	3.38847	0.0989622	3.39	-0.000451818	2.0086	0.0677807	2.01	-0.000694673	0.0957225	0.014641	0.0903664	0.0153316	0.105479	0.0176838	0.0191336	0.00464896	0.0162564	0.00476771	497.349
Lu	0.026594	0.00983901	0.0428584	0.00809266	0.0356827	0.00778912	0.0395605	0.00558426	0.00786533	0.00256276	0.0124395	0.00420173	0.00778325	0.00224898	0.00889639	0.00158526	0.00484797	0.00168297	0.00417306	0.000960364	0.00458291	0.00126742	38.5078	1.30452	36.9	0.0435722	0.249732	0.00975492	0.248	0.00698535	0.504427	0.0139024	0.503	0.00283608	0.279103	0.01156	0.279	0.000368007	0.0169832	0.00209833	0.0140882	0.00124364	0.018575	0.00310317	0.00585701	0.00265081	0.00390515	0.00114957	491.581
Sc	49.5459	4.35896	57.8584	2.60483	53.7814	2.30181	52.6806	1.70341	24.0213	1.00008	29.2586	1.08112	25.5617	3.03034	24.7164	2.196	23.1425	2.68235	19.4702	2.26099	21.7705	3.02059	42.4127	0.39423	41	0.0344567	42.0681	0.576258	43	-0.021672	34.5132	0.437168	33	0.0458547	32.9573	0.459973	33	-0.00129293	51.5466	4.46369	42.0569	2.11878	49.9374	4.16507	17.8567	2.21733	15.9644	4.26554	491.705
V	110.577	13.3447	126.652	12.0043	127.321	13.347	128.859	7.07989	76.2912	3.33401	81.2055	6.87665	65.9263	13.4206	64.5789	11.4601	53.8667	19.6446	43.7835	15.4593	53.943	20.6115	38.484	0.686272	39	-0.0132318	322.275	3.30658	326	-0.0114275	421.082	4.55208	425	-0.00921897	318.134	2.98345	308	0.0329017	103.134	9.84079	94.5359	8.77987	106.426	14.3772	63.8296	12.6724	49.8836	21.9436	456.916
Cr	2190.47	250.936	2293.54	244.813	2383.35	74.2486	2308.21	175.925	2458.8	823.265	2008.4	327.416	1619.57	468.967	1530.7	423.853	936.899	451.785	858.977	457.615	1119.37	496.814	37.5496	0.329538	36	0.0430443	396.288	5.19081	392	0.0109384	15.7457	0.520574	17	-0.0737813	292.471	3.55768	293	-0.00180666	1735.77	327.993	1684.11	143.612	1694.36	259.977	1411.27	331.938	908.02	461.391	424.224
Co	19.9372	2.34075	22.2899	2.75807	21.5108	2.24683	25.7552	5.36414	49.3567	2.49555	49.8356	2.27446	47.5817	2.7799	49.279	3.60188	48.7142	1.49427	50.7084	1.29717	51.0692	1.38406	35.2991	0.152152	35	0.00854644	52.5694	0.618088	52	0.0109504	37.3308	0.427892	38	-0.0176116	44.3938	0.456032	44	0.00895004	21.1658	3.19841	19.6082	1.79139	20.032	2.74404	52.6269	0.971959	50.204	0.752836	414.688
Ni	342.551	43.3978	369.181	50.7924	356.837	40.4512	386.642	60.5913	571.84	38.2075	604.247	39.7057	583.164	20.0581	623.719	102.259	571.651	38.3656	593.689	24.8909	607.249	24.5555	38.7815	0.309868	38.8	-0.000478017	175.82	1.91504	178	-0.0122498	12.2168	0.444905	13	-0.0602425	120.214	1.68196	116	0.0363295	338.467	17.903	365.936	12.733	325.15	13.6375	697.269	23.6514	601.144	20.7792	446.552
Mn	628.304	45.7369	771.414	187.824	837.298	319.119	821.77	169.582	1208.65	39.3657	1236.86	40.9301	1231.6	43.244	1290.48	65.7347	1220.93	25.3513	1223.65	32.9755	1218.93	20.8918	42.2393	2.74594	37.9992	0.111584	1395.38	18.4593	1471.52	-0.0517437	1598.02	30.0146	1549.97	0.031001	1370.42	22.3853	1316.62	0.0408589	586.467	31.0776	579.381	34.2251	595.916	32.2822	1182.7	19.6244	1234.05	21.3786	469.176
Note: (1) The bold italic analyses were measured in Wuhan Sample Solution Analytical Technology Co., LTD. and others in the State Key Laboratory of Geological Processes and Mineral Resources, China University of Geosciences, Wuhan (GPMR-CUGW). (2) "-" referes to elements below detection limit. (3) n.p., not provided.
[truncated: 15 more columns]

## Sheet: Table S6
Table S6 The pressure-temperature conditions and compositions of starting materials used in the modeling of hydrous fluxing melting and peridotite-melt interaction
	For fluxing melting		Components involved in melt percolation
	Depleted MORB mantle (Salters and Stracke, 2004)	Slab component (Manning, 2004)	High-Si boninitic melt (Kamenetsky et al., 2002)	Low-Si boninitic melt (Sobolev and Danyushevsky, 1994)
P-T conditions	1.25 Gpa, 1250 °C	1.75 Gpa, 550 °C	1440 °C	1400 °C
SiO2 (wt%)	44.8285	2.0303	55.5595	50.907
TiO2 (wt%)	0.132933		0.0760834	0.0980488
Al2O3 (wt%)	4.27319	0.00774282	4.5706	6.93205
Cr2O3 (wt%)	0.364803			0
FeOTotal (wt%)	8.05715		9.13026	9.10874
MnO(wt%)	0.134718			0.196098
MgO (wt%)	38.1592	3.82547e-06	25.7457	23.767
CaO (wt%)	3.49443	0.042587	2.51261	6.33395
Na2O (wt%)	0.289538	2.99467	0.315345	0.598098
K2O (wt%)	0.00721612		0.0759622	0.0980488
P2O5 (wt%)	0.00931185		0.0139344	0
NiO (wt%)	0.249036			0
H2O (wt%)	0	94.9247	2	1.96098
SUM	100	100	100	100
Note: (1) All the major-element compositions are normalized to 100 wt%. (2) The high-Si and low-Si boninitic melts were named on the basis of the scheme of Pearce and Reagan (2019).
References:
Kamenetsky, V. S., Sobolev, A. V., Eggins, S. M., Crawford, A. J., and Arculus, R. J., 2002, Olivine-enriched melt inclusions in chromites from low-Ca boninites, Cape Vogel, Papua New Guinea: evidence for ultramafic primary magma, refractory mantle source and enriched components: Chemical Geology, v. 183, no. 1, p. 287-303.
Manning, C. E., 2004, The chemistry of subduction-zone fluids: Earth and Planetary Science Letters, v. 223, no. 1, p. 1-16.
Pearce, J.A., and Reagan, M.K., 2019, Identification, classification, and interpretation of boninites from Anthropocene to Eoarchean using Si-Mg-Ti systematics: Geosphere, v. 15, no. 4, p. 1008-1037.
Salters, V. J. M., and Stracke, A., 2004, Composition of the depleted mantle: Geochemistry, Geophysics, Geosystems, v. 5, no. 5.
Sobolev, A. V., and Danyushevsky, L. V., 1994, Petrology and Geochemistry of Boninites from the North Termination of the Tonga Trench: Constraints on the Generation Conditions of Primary High-Ca Boninite Magmas: Journal of Petrology, v. 35, no. 5, p. 1183-1211.

## Sheet: Table S7
Table S7 Modeling results of isothermal fluxing melting and isenthalpic boninitic melt percolation
Part I Isothermal fluxing melting of depleted MORB mantle (Salters and Stracke, 2004) by slab component (Manning, 2004) at 1.25 Gpa and 1250 °C
Case	Melt fraction (F, %)	Solid residue
		Mass (g)	SiO2 (wt)	TiO2 (wt)	Al2O3 (wt)	FeOT (wt)	Cr2O3 (wt)	MnO (wt)	MgO (wt)	CaO (wt)	Na2O (wt)	Total (wt%)
Fluxing - step of 0.1 g slab component	0.247606	99.7524	45.0076	0.12899	3.95135	8.20946	0.371523	0.140554	38.4012	3.49841	0.271766	99.9809
Fluxing - step of 0.1 g slab component	3.77	96.23	44.7006	0.113985	3.40409	8.32067	0.381354	0.144873	39.4377	3.35044	0.127311	99.981
Fluxing - step of 0.1 g slab component	6.55711	93.4429	44.4523	0.101655	2.95611	8.39829	0.389857	0.148465	40.2961	3.17189	0.066843	99.9815
Fluxing - step of 0.1 g slab component	8.95313	91.0469	44.2835	0.0923879	2.56525	8.43814	0.397055	0.1516	41.0712	2.95076	0.0322199	99.9821
Fluxing - step of 0.1 g slab component	11.1847	88.8153	44.1071	0.082897	2.19162	8.47822	0.403915	0.154643	41.826	2.72205	0.0162595	99.9827
Fluxing - step of 0.1 g slab component	13.2947	86.7053	43.9251	0.0733078	1.83191	8.51743	0.410264	0.157618	42.5727	2.48684	0.00842065	99.9836
Fluxing - step of 0.1 g slab component	15.2978	84.7022	43.7332	0.0635631	1.48741	8.55672	0.415965	0.160516	43.3139	2.24862	0.00463294	99.9845
Fluxing - step of 0.1 g slab component	17.192	82.808	43.5289	0.0537031	1.16354	8.59611	0.420855	0.163296	44.0455	2.01078	0.00281281	99.9855
Fluxing - step of 0.1 g slab component	18.9655	81.0345	43.3103	0.0438612	0.868949	8.63496	0.424782	0.165884	44.7589	1.77705	0.00190188	99.9866
Fluxing - step of 0.1 g slab component	20.6022	79.3978	43.0761	0.0342811	0.614603	8.67205	0.427648	0.168173	45.4419	1.55151	0.0013854	99.9877
Fluxing - step of 0.1 g slab component	22.0902	77.9098	42.8259	0.0253461	0.410749	8.7059	0.429449	0.170033	46.0826	1.33775	0.00103154	99.9888
Fluxing - step of 0.1 g slab component	23.4334	76.5666	42.5599	0.0175654	0.261724	8.73541	0.430289	0.171346	46.6757	1.1371	0.000750181	99.9898
Fluxing - step of 0.1 g slab component	24.6555	75.3445	42.2791	0.0113982	0.16268	8.7606	0.43033	0.172059	47.2263	0.947733	0.000517245	99.9907
Fluxing - step of 0.1 g slab component	25.791	74.209	41.9847	0.00698643	0.101674	8.78272	0.429727	0.172225	47.7476	0.765605	0.000331001	99.9916
Fluxing - step of 0.1 g slab component	26.8721	73.1279	41.6781	0.00409974	0.0653658	8.80355	0.428596	0.17199	48.254	0.58643	0.000188309	99.9923
Fluxing - step of 0.1 g slab component	27.921	72.079	41.3601	0.00233053	0.0435103	8.82459	0.427008	0.171512	48.757	0.406971	8.00839e-05	99.9931
Fluxing - step of 0.1 g slab component	28.8871	71.1129	41.0312	0.00136625	0.0308976	8.84395	0.424202	0.170771	49.2219	0.269376	2.42367e-05	99.9937
Fluxing - step of 0.1 g slab component	29.7161	70.2839	40.7302	0.000851352	0.0236369	8.85386	0.418715	0.169562	49.6099	0.187553	-3.2268e-17	99.9943
Fluxing - step of 0.1 g slab component	30.1331	69.8669	40.7657	0.000641602	0.0231807	8.78361	0.388717	0.165087	49.7085	0.159228	-7.21347e-18	99.9947
Note: The initial mass of depleted MORB mantle is set as 100g, with each step being fluxed by 0.1 g slab components.
Part II Isenthalpic percolation of primary boninitic melts, including both the high-Si and low-Si endmembers, into peridotite residues after isothermal fluxing melting (1.25 Gpa and 1250 °C) of depleted MORB mantle
Case	Pressure (Gpa)	Temperature (°C)	Bulk mass (g)	Solid mass (g)	Net melt added (%)	Major-element compositions of the metasomatized peridotites										Modal abundances in the metasomatized peridotites
						SiO2 (wt)	TiO2 (wt)	Al2O3 (wt)	Cr2O3 (wt)	FeOT (wt)	MnO (wt)	MgO (wt)	CaO (wt)	Na2O (wt)	Total (wt%)	Olivine (wt%)	Orthopyroxene (wt%)	Clinopyroxene (wt%)	Spinel (wt%)
Pre-metasomatic peridotite after 20.6% fluxing melting	1.25 Gpa	1250	99.9995	99.9995	0	43.0763	0.0342792	0.614607	0.42765	8.6721	0.168174	45.4422	1.55152	0.00138541	99.9882	81.3862	12.0987	5.50772	1.00744
Percolation - step of 1 g high-Si boninitic melt	1.25 Gpa	1251.87	100.999	100.62	0.620371	43.1683	0.0330896	0.608531	0.423998	8.68489	0.16695	45.3765	1.52237	0.00292125	99.9876	80.8954	12.8194	5.29233	0.992831
Percolation - step of 1 g high-Si boninitic melt	1.25 Gpa	1253.65	101.999	101.23	1.23007	43.2579	0.031939	0.602311	0.420408	8.69704	0.165753	45.3148	1.49317	0.00357189	99.9869	80.4142	13.5408	5.0654	0.97959
Percolation - step of 1 g high-Si boninitic melt	1.25 Gpa	1255.38	102.738	101.834	1.83442	43.3459	0.030825	0.596242	0.416881	8.70862	0.164576	45.2553	1.46395	0.00395696	99.9862	79.9405	14.2584	4.83405	0.967099
Percolation - step of 1 g high-Si boninitic melt	1.25 Gpa	1257.07	103.346	102.435	2.43506	43.4327	0.0297428	0.590346	0.413412	8.71971	0.163417	45.1974	1.43478	0.00420444	99.9857	79.4736	14.9711	4.60013	0.955195
Percolation - step of 1 g high-Si boninitic melt	1.25 Gpa	1258.71	103.949	103.032	3.0322	43.5181	0.0286925	0.584638	0.410002	8.73032	0.162275	45.1411	1.40565	0.00434965	99.9851	79.0134	15.6788	4.36401	0.943813
Percolation - step of 1 g high-Si boninitic melt	1.25 Gpa	1260.31	104.549	103.625	3.62597	43.6023	0.0276743	0.57913	0.406648	8.74046	0.161149	45.0863	1.37655	0.00441939	99.9846	78.5596	16.3815	4.12601	0.932899
Percolation - step of 1 g high-Si boninitic melt	1.25 Gpa	1261.87	105.146	104.216	4.2165	43.6854	0.0266879	0.573827	0.40335	8.75011	0.160039	45.0328	1.34747	0.00443383	99.9841	78.1121	17.0791	3.88637	0.922404
Percolation - step of 1 g high-Si boninitic melt	1.25 Gpa	1263.39	105.74	104.803	4.80387	43.7673	0.0257331	0.568729	0.400106	8.7593	0.158945	44.9807	1.31842	0.0044081	99.9836	77.6708	17.7717	3.64528	0.912289
Percolation - step of 1 g high-Si boninitic melt	1.25 Gpa	1264.88	106.33	105.388	5.38817	43.8481	0.0248098	0.563835	0.396916	8.76802	0.157866	44.9299	1.28938	0.00435346	99.9832	77.2355	18.4591	3.40291	0.902518
Percolation - step of 1 g high-Si boninitic melt	1.25 Gpa	1266.33	106.917	105.969	5.96943	43.9279	0.0239174	0.559142	0.393777	8.77628	0.156801	44.8803	1.26035	0.00427827	99.9827	76.8061	19.1415	3.15939	0.893061
Percolation - step of 1 g high-Si boninitic melt	1.25 Gpa	1267.75	107.501	106.547	6.54773	44.0067	0.0230555	0.554645	0.390688	8.78412	0.155751	44.832	1.23133	0.00418871	99.9825	76.3824	19.8188	2.91483	0.883889
Percolation - step of 1 g high-Si boninitic melt	1.25 Gpa	1269.13	108.083	107.123	7.12309	44.0844	0.0222238	0.550338	0.387647	8.79151	0.154715	44.7848	1.20232	0.0040893	99.982	75.9644	20.4913	2.66932	0.87498
Percolation - step of 1 g high-Si boninitic melt	1.25 Gpa	1270.48	108.661	107.695	7.69555	44.1612	0.0214216	0.546214	0.384654	8.79848	0.153692	44.7387	1.17332	0.00398335	99.9817	75.552	21.1588	2.42294	0.866311
Percolation - step of 1 g high-Si boninitic melt	1.25 Gpa	1271.8	109.236	108.265	8.26515	44.2371	0.0206485	0.542267	0.381707	8.80505	0.152683	44.6937	1.14433	0.00387327	99.9814	75.1449	21.8215	2.17577	0.857864
Percolation - step of 1 g high-Si boninitic melt	1.25 Gpa	1273.09	109.809	108.831	8.83191	44.312	0.019904	0.538488	0.378805	8.81122	0.151687	44.6498	1.11535	0.00376079	99.981	74.7431	22.4794	1.92786	0.849622
Percolation - step of 1 g high-Si boninitic melt	1.25 Gpa	1274.35	110.378	109.395	9.39586	44.386	0.0191873	0.534871	0.375945	8.817	0.150703	44.607	1.08637	0.00364715	99.9807	74.3466	23.1326	1.67926	0.841571
Percolation - step of 1 g high-Si boninitic melt	1.25 Gpa	1275.58	110.945	109.956	9.95703	44.4592	0.018498	0.531408	0.373128	8.8224	0.149732	44.5652	1.05741	0.00353323	99.9805	73.9551	23.7812	1.43004	0.833697
Percolation - step of 1 g high-Si boninitic melt	1.25 Gpa	1276.78	111.509	110.515	10.5154	44.5315	0.0178354	0.528091	0.370351	8.82745	0.148773	44.5244	1.02844	0.00341965	99.9803	73.5686	24.4252	1.18024	0.825986
Percolation - step of 1 g high-Si boninitic melt	1.25 Gpa	1277.96	112.07	111.071	11.0711	44.603	0.0171989	0.524914	0.367614	8.83213	0.147826	44.4846	0.999488	0.00330685	99.9801	73.187	25.0647	0.929897	0.81843
Percolation - step of 1 g high-Si boninitic melt	1.25 Gpa	1279.1	112.629	111.623	11.6241	44.6736	0.0165878	0.52187	0.364914	8.83648	0.14689	44.4457	0.97054	0.00319511	99.9798	72.8101	25.6998	0.679058	0.811017
Percolation - step of 1 g high-Si boninitic melt	1.25 Gpa	1280.22	113.184	112.174	12.1744	44.7435	0.0160014	0.518952	0.362252	8.8405	0.145966	44.4078	0.941599	0.00308462	99.9797	72.438	26.3305	0.427761	0.803739
Percolation - step of 1 g high-Si boninitic melt	1.25 Gpa	1281.32	113.737	112.721	12.722	44.8126	0.0154391	0.516153	0.359626	8.8442	0.145053	44.3708	0.912665	0.00297551	99.9795	72.0704	26.9569	0.176044	0.796589
Percolation - step of 1 g high-Si boninitic melt	1.25 Gpa	1282.45	114.288	113.272	13.2726	44.8807	0.0149333	0.514076	0.357009	8.8475	0.144143	44.3327	0.885289	0.00289009	99.9792	71.7058	27.5055	0	0.788723
Percolation - step of 1 g high-Si boninitic melt	1.25 Gpa	1283.7	114.841	113.835	13.8357	44.9477	0.0145322	0.513679	0.354359	8.85029	0.143222	44.2904	0.862055	0.00285972	99.9791	71.3411	27.8797	0	0.779229
Percolation - step of 1 g high-Si boninitic melt	1.25 Gpa	1284.95	115.407	114.402	14.4024	45.0137	0.0141788	0.513961	0.351713	8.85269	0.142304	44.2469	0.840654	0.00283895	99.9789	70.9776	28.2521	0	0.770285
Percolation - step of 1 g high-Si boninitic melt	1.25 Gpa	1286.17	115.977	114.972	14.9722	45.0787	0.0138664	0.514823	0.349074	8.85472	0.141389	44.2024	0.820927	0.00282491	99.9787	70.6158	28.6224	0	0.761805
Percolation - step of 1 g high-Si boninitic melt	1.25 Gpa	1287.39	116.549	115.544	15.5445	45.1429	0.0135899	0.516181	0.346444	8.8564	0.140477	44.1571	0.80273	0.00281569	99.9786	70.2561	28.9902	0	0.75372
Percolation - step of 1 g high-Si boninitic melt	1.25 Gpa	1288.58	117.125	116.118	16.1189	45.2062	0.0133445	0.51796	0.343823	8.85775	0.139571	44.1111	0.785932	0.00280997	99.9785	69.8988	29.3553	0	0.74597
Percolation - step of 1 g high-Si boninitic melt	1.25 Gpa	1289.76	117.702	116.694	16.6951	45.2686	0.0131263	0.520097	0.341215	8.85878	0.138669	44.0646	0.770416	0.00280682	99.9783	69.544	29.7175	0	0.738509
Percolation - step of 1 g high-Si boninitic melt	1.25 Gpa	1290.92	118.281	117.272	17.2725	45.3302	0.012932	0.522536	0.338619	8.85951	0.137774	44.0177	0.756076	0.0028056	99.9781	69.192	30.0767	0	0.731297
Percolation - step of 1 g high-Si boninitic melt	1.25 Gpa	1292.06	118.861	117.85	17.8509	45.391	0.0127587	0.525229	0.336036	8.85995	0.136885	43.9705	0.742816	0.00280585	99.978	68.843	30.4327	0	0.724301
Percolation - step of 1 g high-Si boninitic melt	1.25 Gpa	1293.18	119.442	118.429	18.43	45.4511	0.0126038	0.528135	0.333468	8.8601	0.136002	43.9232	0.730548	0.00280725	99.978	68.497	30.7855	0	0.717494
Percolation - step of 1 g high-Si boninitic melt	1.25 Gpa	1294.28	120.024	119.009	19.0096	45.5104	0.0124652	0.531215	0.330916	8.85998	0.135126	43.8757	0.719193	0.00280953	99.9778	68.1542	31.1349	0	0.710852
Percolation - step of 1 g high-Si boninitic melt	1.25 Gpa	1295.37	120.607	119.589	19.5894	45.5689	0.0123409	0.534439	0.328379	8.85961	0.134258	43.8283	0.708679	0.00281253	99.9777	67.8147	31.481	0	0.704356
Percolation - step of 1 g high-Si boninitic melt	1.25 Gpa	1296.44	121.19	120.169	20.1692	45.6267	0.0122293	0.537779	0.325858	8.85898	0.133397	43.7808	0.698942	0.0028161	99.9775	67.4784	31.8236	0	0.69799
Percolation - step of 1 g high-Si boninitic melt	1.25 Gpa	1297.49	121.772	120.748	20.7489	45.6838	0.012129	0.54121	0.323353	8.8581	0.132543	43.7335	0.689921	0.00282014	99.9774	67.1456	32.1627	0	0.69174
Percolation - step of 1 g high-Si boninitic melt	1.25 Gpa	1298.52	122.355	121.328	21.3283	45.7403	0.0120385	0.544711	0.320866	8.857	0.131697	43.6864	0.681562	0.00282455	99.9774	66.8161	32.4983	0	0.685595
Percolation - step of 1 g high-Si boninitic melt	1.25 Gpa	1299.53	122.937	121.907	21.9072	45.7961	0.0119569	0.548265	0.318395	8.85567	0.130859	43.6394	0.673816	0.00282926	99.9773	66.49	32.8305	0	0.679544
Percolation - step of 1 g high-Si boninitic melt	1.25 Gpa	1300.52	123.519	122.485	22.4856	45.8512	0.0118831	0.551854	0.315941	8.85414	0.130028	43.5927	0.666637	0.00283423	99.9772	66.1673	33.1591	0	0.67358
Percolation - step of 1 g high-Si boninitic melt	1.25 Gpa	1301.5	124.1	123.063	23.0632	45.9057	0.0118163	0.555464	0.313505	8.85239	0.129205	43.5462	0.659984	0.00283941	99.9771	65.8481	33.4842	0	0.667695
Percolation - step of 1 g high-Si boninitic melt	1.25 Gpa	1302.45	124.681	123.639	23.6401	45.9595	0.0117556	0.559084	0.311085	8.85044	0.12839	43.5001	0.653819	0.00284475	99.977	65.5322	33.8059	0	0.661884
Percolation - step of 1 g high-Si boninitic melt	1.25 Gpa	1303.39	125.261	124.215	24.2161	46.0128	0.0117003	0.562704	0.308683	8.84829	0.127583	43.4542	0.648106	0.00285023	99.9769	65.2197	34.1241	0	0.65614
Percolation - step of 1 g high-Si boninitic melt	1.25 Gpa	1304.32	125.84	124.79	24.7911	46.0655	0.0116499	0.566313	0.306298	8.84596	0.126784	43.4088	0.642815	0.00285581	99.977	64.9106	34.4389	0	0.65046
Percolation - step of 1 g high-Si boninitic melt	1.25 Gpa	1305.22	126.417	125.364	25.3651	46.1175	0.0116037	0.569904	0.30393	8.84345	0.125992	43.3636	0.637914	0.00286147	99.9768	64.6049	34.7503	0	0.64484
Percolation - step of 1 g high-Si boninitic melt	1.25 Gpa	1306.11	126.994	125.937	25.938	46.1691	0.0115613	0.573471	0.301579	8.84076	0.125208	43.3189	0.633378	0.0028672	99.9768	64.3024	35.0583	0	0.639277
Percolation - step of 1 g high-Si boninitic melt	1.25 Gpa	1306.98	127.57	126.509	26.5098	46.22	0.0115223	0.577007	0.299245	8.8379	0.124432	43.2745	0.629181	0.00287297	99.9767	64.0032	35.363	0	0.633767
Percolation - step of 1 g high-Si boninitic melt	1.25 Gpa	1307.84	128.145	127.08	27.0804	46.2705	0.0114863	0.580507	0.296927	8.83488	0.123663	43.2306	0.6253	0.00287877	99.9767	63.7073	35.6644	0	0.628309
Percolation - step of 1 g high-Si boninitic melt	1.25 Gpa	1308.68	128.718	127.649	27.6497	46.3203	0.0114529	0.583968	0.294626	8.83171	0.122902	43.187	0.621713	0.00288459	99.9766	63.4145	35.9626	0	0.6229
Percolation - step of 1 g high-Si boninitic melt	1.25 Gpa	1309.5	129.29	128.217	28.2178	46.3697	0.0114219	0.587386	0.292341	8.82839	0.122149	43.1439	0.618402	0.00289041	99.9766	63.125	36.2575	0	0.617538
Percolation - step of 1 g high-Si boninitic melt	1.25 Gpa	1310.31	129.861	128.784	28.7847	46.4186	0.0113928	0.590757	0.290072	8.82491	0.121403	43.1012	0.615348	0.00289622	99.9766	62.8385	36.5493	0	0.612223
Percolation - step of 1 g high-Si boninitic melt	1.25 Gpa	1311.1	130.431	129.349	29.3501	46.467	0.0113656	0.59408	0.287819	8.82129	0.120664	43.0589	0.612533	0.00290203	99.9766	62.5551	36.8379	0	0.606952
Percolation - step of 1 g high-Si boninitic melt	1.25 Gpa	1311.88	130.999	129.914	29.9143	46.5148	0.01134	0.597353	0.285582	8.81754	0.119932	43.017	0.609943	0.00290781	99.9764	62.2748	37.1235	0	0.601724
Percolation - step of 1 g high-Si boninitic melt	1.25 Gpa	1312.64	131.566	130.476	30.4771	46.5622	0.0113158	0.600573	0.28336	8.81366	0.119208	42.9756	0.607563	0.00291356	99.9764	61.9974	37.4061	0	0.596539
Percolation - step of 1 g high-Si boninitic melt	1.25 Gpa	1313.39	132.132	131.038	31.0385	46.6092	0.0112928	0.60374	0.281154	8.80965	0.11849	42.9346	0.605379	0.00291929	99.9764	61.723	37.6856	0	0.591394
Percolation - step of 1 g high-Si boninitic melt	1.25 Gpa	1314.13	132.696	131.598	31.5986	46.6556	0.0112708	0.606854	0.278963	8.80552	0.11778	42.8941	0.603379	0.00292498	99.9764	61.4515	37.9622	0	0.58629
Percolation - step of 1 g high-Si boninitic melt	1.25 Gpa	1314.85	133.259	132.156	32.1572	46.7016	0.0112498	0.609912	0.276786	8.80126	0.117076	42.854	0.601552	0.00293063	99.9764	61.1828	38.2359	0	0.581226
Percolation - step of 1 g high-Si boninitic melt	1.25 Gpa	1315.55	133.821	132.714	32.7145	46.7472	0.0112296	0.612916	0.274625	8.7969	0.116379	42.8143	0.599886	0.00293623	99.9764	60.917	38.5068	0	0.5762
Percolation - step of 1 g high-Si boninitic melt	1.25 Gpa	1316.25	134.381	133.27	33.2704	46.7924	0.0112101	0.615864	0.272477	8.79242	0.115689	42.775	0.598371	0.0029418	99.9764	60.6539	38.7749	0	0.571213
Percolation - step of 1 g high-Si boninitic melt	1.25 Gpa	1316.93	134.939	133.824	33.8248	46.8371	0.0111912	0.618758	0.270344	8.78785	0.115006	42.7362	0.596999	0.00294732	99.9764	60.3936	39.0402	0	0.566264
Percolation - step of 1 g high-Si boninitic melt	1.25 Gpa	1317.6	135.497	134.377	34.3779	46.8813	0.0111729	0.621596	0.268225	8.78317	0.114329	42.6978	0.59576	0.00295279	99.9763	60.1359	39.3028	0	0.561351
Percolation - step of 1 g high-Si boninitic melt	1.25 Gpa	1318.25	136.052	134.929	34.9295	46.9252	0.011155	0.62438	0.266119	8.77839	0.113658	42.6598	0.594646	0.00295821	99.9763	59.8809	39.5627	0	0.556476
Percolation - step of 1 g high-Si boninitic melt	1.25 Gpa	1318.89	136.607	135.479	35.4798	46.9687	0.0111374	0.62711	0.264027	8.77352	0.112994	42.6222	0.59365	0.00296358	99.9763	59.6284	39.82	0	0.551636
Percolation - step of 1 g high-Si boninitic melt	1.25 Gpa	1319.52	137.16	136.028	36.0287	47.0118	0.0111203	0.629787	0.261949	8.76855	0.112335	42.5851	0.592764	0.00296891	99.9764	59.3785	40.0747	0	0.546833
Percolation - step of 1 g high-Si boninitic melt	1.25 Gpa	1320.14	137.712	136.575	36.5762	47.0544	0.0111033	0.632411	0.259883	8.76351	0.111683	42.5484	0.591983	0.00297419	99.9763	59.1311	40.3268	0	0.542065
Percolation - step of 1 g high-Si boninitic melt	1.25 Gpa	1320.75	138.262	137.122	37.1223	47.0967	0.0110867	0.634983	0.257831	8.75837	0.111037	42.512	0.591298	0.00297941	99.9763	58.8862	40.5765	0	0.537333
Percolation - step of 1 g high-Si boninitic melt	1.25 Gpa	1321.34	138.811	137.666	37.6671	47.1387	0.0110702	0.637504	0.255791	8.75316	0.110397	42.4761	0.590706	0.0029846	99.9764	58.6437	40.8237	0	0.532634
Percolation - step of 1 g high-Si boninitic melt	1.25 Gpa	1321.92	139.358	138.21	38.2105	47.1802	0.0110539	0.639974	0.253764	8.74787	0.109763	42.4405	0.5902	0.00298973	99.9763	58.4035	41.0685	0	0.52797
Percolation - step of 1 g high-Si boninitic melt	1.25 Gpa	1322.5	139.904	138.752	38.7526	47.2214	0.0110377	0.642395	0.251749	8.7425	0.109134	42.4054	0.589776	0.00299481	99.9764	58.1658	41.3109	0	0.52334
Percolation - step of 1 g high-Si boninitic melt	1.25 Gpa	1323.06	140.449	139.293	39.2933	47.2622	0.0110217	0.644768	0.249746	8.73707	0.108511	42.3706	0.589428	0.00299986	99.9763	57.9303	41.551	0	0.518743
Percolation - step of 1 g high-Si boninitic melt	1.25 Gpa	1323.61	140.993	139.832	39.8327	47.3027	0.0110058	0.647094	0.247755	8.73157	0.107894	42.3362	0.589152	0.00300485	99.9764	57.6971	41.7888	0	0.514181
Percolation - step of 1 g high-Si boninitic melt	1.25 Gpa	1324.15	141.535	140.37	40.3708	47.3428	0.0109899	0.649373	0.245776	8.726	0.107282	42.3022	0.588944	0.0030098	99.9764	57.4661	42.0243	0	0.50965
Percolation - step of 1 g high-Si boninitic melt	1.25 Gpa	1324.68	142.075	140.907	40.9076	47.3826	0.0109741	0.651607	0.243808	8.72037	0.106676	42.2686	0.5888	0.00301471	99.9764	57.2373	42.2576	0	0.505153
Percolation - step of 1 g high-Si boninitic melt	1.25 Gpa	1325.2	142.615	141.442	41.4432	47.422	0.0109584	0.653796	0.241852	8.71468	0.106075	42.2353	0.588717	0.00301958	99.9764	57.0106	42.4887	0	0.500687
Percolation - step of 1 g high-Si boninitic melt	1.25 Gpa	1325.72	143.153	141.977	41.9774	47.4611	0.0109427	0.655943	0.239907	8.70893	0.105479	42.2024	0.58869	0.00302441	99.9764	56.7861	42.7177	0	0.496254
Percolation - step of 1 g high-Si boninitic melt	1.25 Gpa	1326.22	143.69	142.51	42.5104	47.4999	0.0109271	0.658047	0.237973	8.70314	0.104888	42.1698	0.588716	0.0030292	99.9764	56.5636	42.9445	0	0.491852
Percolation - step of 1 g high-Si boninitic melt	1.25 Gpa	1326.71	144.226	143.041	43.0422	47.5384	0.0109115	0.66011	0.23605	8.69728	0.104303	42.1376	0.588793	0.00303395	99.9765	56.3432	43.1693	0	0.487481
Percolation - step of 1 g high-Si boninitic melt	1.25 Gpa	1327.19	144.76	143.572	43.5727	47.5765	0.0108959	0.662133	0.234138	8.69138	0.103722	42.1058	0.588918	0.00303866	99.9765	56.1248	43.392	0	0.483142
Percolation - step of 1 g high-Si boninitic melt	1.25 Gpa	1327.67	145.293	144.101	44.102	47.6143	0.0108804	0.664117	0.232237	8.68543	0.103146	42.0742	0.589087	0.00304334	99.9764	55.9084	43.6128	0	0.478833
Percolation - step of 1 g high-Si boninitic melt	1.25 Gpa	1328.13	145.825	144.629	44.6302	47.6519	0.0108649	0.666064	0.230346	8.67944	0.102576	42.043	0.589299	0.00304798	99.9765	55.6939	43.8315	0	0.474554
Percolation - step of 1 g high-Si boninitic melt	1.25 Gpa	1328.59	146.356	145.156	45.1571	47.6891	0.0108494	0.667973	0.228465	8.6734	0.10201	42.0122	0.589551	0.0030526	99.9766	55.4814	44.0483	0	0.470306
Percolation - step of 1 g high-Si boninitic melt	1.25 Gpa	1329.04	146.886	145.682	45.6829	47.726	0.010834	0.669846	0.226594	8.66732	0.101448	41.9816	0.58984	0.00305718	99.9765	55.2707	44.2632	0	0.466088
Percolation - step of 1 g high-Si boninitic melt	1.25 Gpa	1329.48	147.414	146.207	46.2075	47.7626	0.0108186	0.671684	0.224734	8.6612	0.100892	41.9514	0.590165	0.00306173	99.9766	55.0619	44.4762	0	0.461898
Percolation - step of 1 g high-Si boninitic melt	1.25 Gpa	1329.91	147.941	146.73	46.731	47.799	0.0108033	0.673489	0.222883	8.65505	0.10034	41.9215	0.590523	0.00306625	99.9767	54.8549	44.6873	0	0.457738
Percolation - step of 1 g high-Si boninitic melt	1.25 Gpa	1330.34	148.468	147.253	47.2534	47.835	0.010788	0.67526	0.221042	8.64887	0.0997921	41.8919	0.590912	0.00307074	99.9766	54.6497	44.8967	0	0.453607
Percolation - step of 1 g high-Si boninitic melt	1.25 Gpa	1330.76	148.993	147.774	47.7747	47.8708	0.0107727	0.676999	0.219211	8.64264	0.099249	41.8626	0.591332	0.00307521	99.9767	54.4463	45.1042	0	0.449504
Percolation - step of 1 g high-Si boninitic melt	1.25 Gpa	1331.16	149.516	148.294	48.2949	47.9063	0.0107575	0.678708	0.21739	8.6364	0.0987103	41.8336	0.591779	0.00307965	99.9767	54.2446	45.3099	0	0.445429
Percolation - step of 1 g high-Si boninitic melt	1.25 Gpa	1331.57	150.039	148.813	48.814	47.9415	0.0107424	0.680386	0.215577	8.63012	0.098176	41.8048	0.592253	0.00308407	99.9766	54.0446	45.514	0	0.441383
Percolation - step of 1 g high-Si boninitic melt	1.25 Gpa	1331.96	150.561	149.331	49.3321	47.9765	0.0107273	0.682034	0.213774	8.62382	0.0976459	41.7764	0.592752	0.00308847	99.9767	53.8464	45.7163	0	0.437364
Percolation - step of 1 g high-Si boninitic melt	1.25 Gpa	1332.35	151.082	149.848	49.8491	48.0112	0.0107123	0.683655	0.211981	8.61748	0.09712	41.7483	0.593274	0.00309284	99.9768	53.6497	45.9169	0	0.433372
Percolation - step of 1 g high-Si boninitic melt	1.25 Gpa	1332.73	151.601	150.364	50.3651	48.0456	0.0106973	0.685247	0.210196	8.61113	0.0965983	41.7204	0.593818	0.00309719	99.9768	53.4547	46.1159	0	0.429407
Percolation - step of 1 g high-Si boninitic melt	1.25 Gpa	1333.1	152.12	150.879	50.8801	48.0797	0.0106825	0.686813	0.20842	8.60475	0.0960806	41.6928	0.594384	0.00310152	99.9767	53.2613	46.3132	0	0.425469
Percolation - step of 1 g high-Si boninitic melt	1.25 Gpa	1333.47	152.637	151.393	51.3941	48.1136	0.0106677	0.688353	0.206653	8.59835	0.095567	41.6655	0.594969	0.00310583	99.9768	53.0695	46.5089	0	0.421557
Percolation - step of 1 g high-Si boninitic melt	1.25 Gpa	1333.83	153.154	151.906	51.9071	48.1473	0.010653	0.689868	0.204895	8.59193	0.0950574	41.6385	0.595572	0.00311013	99.9769	52.8793	46.7031	0	0.417671
Percolation - step of 1 g high-Si boninitic melt	1.25 Gpa	1334.19	153.67	152.418	52.4191	48.1807	0.0106383	0.691359	0.203145	8.5855	0.0945517	41.6117	0.596193	0.0031144	99.9769	52.6906	46.8956	0	0.413812
Percolation - step of 1 g high-Si boninitic melt	1.25 Gpa	1334.53	154.184	152.929	52.9302	48.2139	0.0106238	0.692825	0.201404	8.57905	0.0940499	41.5851	0.59683	0.00311866	99.9769	52.5033	47.0867	0	0.409977
Percolation - step of 1 g high-Si boninitic melt	1.25 Gpa	1334.88	154.698	153.44	53.4404	48.2468	0.0106094	0.694269	0.199672	8.57257	0.0935519	41.5588	0.597483	0.00312291	99.9769	52.3176	47.2762	0	0.406168
Percolation - step of 1 g high-Si boninitic melt	1.25 Gpa	1335.21	155.211	153.949	53.9496	48.2795	0.0105951	0.695691	0.197948	8.56609	0.0930577	41.5328	0.59815	0.00312714	99.977	52.1334	47.4642	0	0.402384
Percolation - step of 1 g high-Si boninitic melt	1.25 Gpa	1335.54	155.722	154.457	54.458	48.3119	0.0105809	0.697091	0.196232	8.5596	0.0925672	41.507	0.598831	0.00313135	99.9769	51.9506	47.6508	0	0.398625
Percolation - step of 1 g high-Si boninitic melt	1.25 Gpa	1335.87	156.233	154.965	54.9654	48.3441	0.0105668	0.69847	0.194524	8.55309	0.0920804	41.4815	0.599525	0.00313556	99.977	51.7692	47.8359	0	0.39489
Percolation - step of 1 g high-Si boninitic melt	1.25 Gpa	1336.19	156.743	155.471	55.472	48.3761	0.0105529	0.699829	0.192825	8.54657	0.0915972	41.4562	0.60023	0.00313975	99.977	51.5892	48.0196	0	0.391179
Percolation - step of 1 g high-Si boninitic melt	1.25 Gpa	1336.5	157.252	155.977	55.9776	48.4079	0.010539	0.701168	0.191133	8.54005	0.0911176	41.4311	0.600947	0.00314392	99.9771	51.4107	48.2018	0	0.387492
Percolation - step of 1 g high-Si boninitic melt	1.25 Gpa	1336.81	157.761	156.482	56.4825	48.4394	0.0105253	0.702488	0.18945	8.53351	0.0906415	41.4062	0.601675	0.00314809	99.977	51.2334	48.3827	0	0.383829
Percolation - step of 1 g high-Si boninitic melt	1.25 Gpa	1337.11	158.268	156.986	56.9865	48.4707	0.0105118	0.70379	0.187774	8.52698	0.0901689	41.3816	0.602412	0.00315225	99.9771	51.0576	48.5623	0	0.380189
Percolation - step of 1 g high-Si boninitic melt	1.25 Gpa	1337.41	158.775	157.489	57.4897	48.5018	0.0104983	0.705074	0.186107	8.52043	0.0896998	41.3572	0.603159	0.00315639	99.9771	50.883	48.7404	0	0.376572
Percolation - step of 1 g high-Si boninitic melt	1.25 Gpa	1337.7	159.28	157.991	57.992	48.5327	0.010485	0.706341	0.184447	8.51387	0.0892341	41.333	0.603915	0.00316053	99.9772	50.7098	48.9173	0	0.372978
Percolation - step of 1 g high-Si boninitic melt	1.25 Gpa	1337.98	159.785	158.493	58.4936	48.5633	0.0104719	0.707591	0.182794	8.50732	0.0887717	41.309	0.604678	0.00316465	99.9771	50.5378	49.0928	0	0.369406
Percolation - step of 1 g high-Si boninitic melt	1.25 Gpa	1338.27	160.289	158.994	58.9944	48.5938	0.0104589	0.708824	0.181149	8.50076	0.0883127	41.2853	0.605449	0.00316877	99.9772	50.3671	49.267	0	0.365857
Percolation - step of 1 g high-Si boninitic melt	1.25 Gpa	1338.54	160.792	159.494	59.4944	48.624	0.010446	0.710042	0.179512	8.4942	0.0878569	41.2617	0.606228	0.00317288	99.9772	50.1977	49.44	0	0.362329
Percolation - step of 1 g high-Si boninitic melt	1.25 Gpa	1338.82	161.295	159.993	59.9936	48.654	0.0104333	0.711245	0.177882	8.48763	0.0874044	41.2384	0.607012	0.00317698	99.9772	50.0295	49.6117	0	0.358824
Percolation - step of 1 g high-Si boninitic melt	1.25 Gpa	1339.08	161.797	160.491	60.4921	48.6839	0.0104207	0.712433	0.17626	8.48108	0.0869551	41.2152	0.607803	0.00318108	99.9772	49.8625	49.7821	0	0.35534
Pre-metasomatic peridotite after 20.6% fluxing melting	1.25 Gpa	1250	99.995	99.995	0	43.2633	0.0344301	0.617274	―	8.70974	0.168904	45.6394	1.55825	0.00139142	99.9927	82.6847	11.5574	5.75795	―
Percolation - step of 1 g low-Si boninitic melt	1.25 Gpa	1251.72	100.995	100.54	0.545544	43.3108	0.0334401	0.61073	―	8.72314	0.169846	45.5795	1.55966	0.00493884	99.9921	82.4154	11.8157	5.7689	―
Percolation - step of 1 g low-Si boninitic melt	1.25 Gpa	1253.33	101.995	101.073	1.0781	43.3558	0.0324215	0.60427	―	8.73582	0.170791	45.5242	1.56148	0.00664611	99.9914	82.1529	12.0847	5.76243	―
Percolation - step of 1 g low-Si boninitic melt	1.25 Gpa	1254.9	102.581	101.601	1.60592	43.3998	0.0314113	0.598205	―	8.74792	0.17173	45.4709	1.56325	0.00784292	99.9911	81.8944	12.3553	5.75028	―
Percolation - step of 1 g low-Si boninitic melt	1.25 Gpa	1256.42	103.111	102.125	2.13002	43.4427	0.0304154	0.592538	―	8.75948	0.172661	45.4191	1.56493	0.008707	99.9905	81.6398	12.6262	5.73398	―
Percolation - step of 1 g low-Si boninitic melt	1.25 Gpa	1257.9	103.638	102.646	2.65072	43.4849	0.0294377	0.587276	―	8.77049	0.173584	45.3687	1.56646	0.00932375	99.9902	81.3888	12.897	5.71425	―
Percolation - step of 1 g low-Si boninitic melt	1.25 Gpa	1259.34	104.161	103.163	3.16828	43.5263	0.0284814	0.582414	―	8.78097	0.1745	45.3196	1.56783	0.00975704	99.9898	81.1414	13.167	5.69159	―
Percolation - step of 1 g low-Si boninitic melt	1.25 Gpa	1260.75	104.682	103.678	3.68285	43.567	0.0275488	0.577933	―	8.79093	0.175409	45.2717	1.569	0.0100545	99.9896	80.8975	13.4361	5.66639	―
Percolation - step of 1 g low-Si boninitic melt	1.25 Gpa	1262.13	105.199	104.189	4.19457	43.607	0.0266419	0.573813	―	8.80038	0.17631	45.2249	1.56995	0.0102513	99.9892	80.6572	13.7039	5.63893	―
Percolation - step of 1 g low-Si boninitic melt	1.25 Gpa	1263.47	105.713	104.698	4.70349	43.6464	0.0257619	0.570028	―	8.80935	0.177203	45.1792	1.57067	0.0103739	99.989	80.4203	13.9703	5.60941	―
Percolation - step of 1 g low-Si boninitic melt	1.25 Gpa	1264.78	106.224	105.204	5.20969	43.6851	0.02491	0.56655	―	8.81787	0.178089	45.1345	1.57115	0.0104414	99.9886	80.1869	14.2351	5.578	―
Percolation - step of 1 g low-Si boninitic melt	1.25 Gpa	1266.06	106.733	105.708	5.71319	43.7233	0.0240866	0.563354	―	8.82595	0.178969	45.0909	1.57138	0.0104682	99.9884	79.9569	14.4983	5.5448	―
Percolation - step of 1 g low-Si boninitic melt	1.25 Gpa	1267.31	107.239	106.209	6.21403	43.7609	0.0232922	0.560414	―	8.83361	0.179841	45.0483	1.57135	0.0104649	99.9882	79.7303	14.7598	5.50989	―
Percolation - step of 1 g low-Si boninitic melt	1.25 Gpa	1268.54	107.742	106.707	6.71221	43.798	0.0225269	0.557704	―	8.84087	0.180707	45.0067	1.57107	0.0104393	99.988	79.5071	15.0196	5.47334	―
Percolation - step of 1 g low-Si boninitic melt	1.25 Gpa	1269.73	108.243	107.202	7.20777	43.8346	0.0217906	0.555202	―	8.84776	0.181566	44.966	1.57052	0.0103972	99.9878	79.2872	15.2776	5.4352	―
Percolation - step of 1 g low-Si boninitic melt	1.25 Gpa	1270.9	108.741	107.695	7.70071	43.8706	0.0210832	0.552887	―	8.8543	0.182418	44.9264	1.56971	0.0103429	99.9877	79.0707	15.5338	5.39551	―
Percolation - step of 1 g low-Si boninitic melt	1.25 Gpa	1272.04	109.236	108.186	8.19104	43.9061	0.0204042	0.550741	―	8.86049	0.183264	44.8876	1.56863	0.0102794	99.9875	78.8574	15.7883	5.3543	―
Percolation - step of 1 g low-Si boninitic melt	1.25 Gpa	1273.15	109.729	108.673	8.67878	43.9411	0.0197533	0.548744	―	8.86637	0.184104	44.8498	1.56729	0.0102093	99.9874	78.6474	16.041	5.3116	―
Percolation - step of 1 g low-Si boninitic melt	1.25 Gpa	1274.24	110.219	109.158	9.16394	43.9756	0.0191297	0.546881	―	8.87194	0.184938	44.8129	1.56569	0.0101342	99.9872	78.4407	16.2919	5.26745	―
Percolation - step of 1 g low-Si boninitic melt	1.25 Gpa	1275.31	110.707	109.641	9.64655	44.0097	0.0185328	0.545139	―	8.87722	0.185767	44.777	1.56383	0.0100555	99.9872	78.2371	16.5411	5.22185	―
Percolation - step of 1 g low-Si boninitic melt	1.25 Gpa	1276.35	111.192	110.121	10.1266	44.0432	0.017962	0.543503	―	8.88222	0.186589	44.7419	1.56171	0.00997411	99.9871	78.0366	16.7886	5.17485	―
Percolation - step of 1 g low-Si boninitic melt	1.25 Gpa	1277.36	111.674	110.599	10.6041	44.0764	0.0174164	0.541963	―	8.88697	0.187406	44.7077	1.55933	0.00989076	99.9871	77.8392	17.0344	5.12646	―
Percolation - step of 1 g low-Si boninitic melt	1.25 Gpa	1278.36	112.154	111.074	11.0792	44.109	0.0168953	0.540509	―	8.89146	0.188217	44.6743	1.55671	0.00980603	99.9869	77.6448	17.2785	5.07671	―
Percolation - step of 1 g low-Si boninitic melt	1.25 Gpa	1279.33	112.632	111.546	11.5517	44.1412	0.0163978	0.539131	―	8.89573	0.189023	44.6418	1.55384	0.00972033	99.9868	77.4534	17.521	5.02563	―
Percolation - step of 1 g low-Si boninitic melt	1.25 Gpa	1280.28	113.107	112.016	12.0218	44.173	0.015923	0.537821	―	8.89977	0.189823	44.6101	1.55073	0.00963399	99.9868	77.2649	17.7619	4.97323	―
Percolation - step of 1 g low-Si boninitic melt	1.25 Gpa	1281.21	113.579	112.484	12.4895	44.2044	0.0154702	0.536572	―	8.90359	0.190618	44.5792	1.54738	0.00954725	99.9868	77.0793	18.0011	4.91954	―
Percolation - step of 1 g low-Si boninitic melt	1.25 Gpa	1282.11	114.049	112.949	12.9548	44.2353	0.0150384	0.535378	―	8.90722	0.191408	44.5491	1.54379	0.00946031	99.9867	76.8965	18.2388	4.8646	―
Percolation - step of 1 g low-Si boninitic melt	1.25 Gpa	1283	114.517	113.412	13.4177	44.2659	0.0146268	0.534232	―	8.91064	0.192193	44.5198	1.53998	0.00937332	99.9867	76.7166	18.475	4.80843	―
Percolation - step of 1 g low-Si boninitic melt	1.25 Gpa	1283.87	114.982	113.873	13.8782	44.296	0.0142345	0.533131	―	8.91389	0.192972	44.4912	1.53594	0.00928639	99.9866	76.5393	18.7097	4.75105	―
Percolation - step of 1 g low-Si boninitic melt	1.25 Gpa	1284.71	115.445	114.331	14.3365	44.3257	0.0138607	0.532068	―	8.91695	0.193747	44.4634	1.53168	0.00919963	99.9866	76.3647	18.9428	4.69249	―
Percolation - step of 1 g low-Si boninitic melt	1.25 Gpa	1285.54	115.905	114.787	14.7924	44.3551	0.0135046	0.531042	―	8.91984	0.194517	44.4363	1.5272	0.0091131	99.9866	76.1927	19.1745	4.63278	―
Percolation - step of 1 g low-Si boninitic melt	1.25 Gpa	1286.35	116.363	115.24	15.2461	44.3841	0.0131654	0.530048	―	8.92258	0.195282	44.4099	1.52251	0.00902688	99.9866	76.0233	19.4048	4.57194	―
Percolation - step of 1 g low-Si boninitic melt	1.25 Gpa	1287.14	116.819	115.692	15.6976	44.4127	0.0128422	0.529082	―	8.92515	0.196041	44.3842	1.51762	0.008941	99.9866	75.8564	19.6336	4.51002	―
Percolation - step of 1 g low-Si boninitic melt	1.25 Gpa	1287.91	117.273	116.141	16.1469	44.4409	0.0125343	0.528143	―	8.92758	0.196797	44.3592	1.51253	0.00885551	99.9865	75.6919	19.861	4.44702	―
Percolation - step of 1 g low-Si boninitic melt	1.25 Gpa	1288.67	117.725	116.588	16.594	44.4688	0.012241	0.527229	―	8.92986	0.197547	44.3348	1.50724	0.00877044	99.9865	75.5299	20.0871	4.38299	―
Percolation - step of 1 g low-Si boninitic melt	1.25 Gpa	1289.41	118.174	117.033	17.039	44.4964	0.0119616	0.526336	―	8.93201	0.198293	44.3111	1.50176	0.00868583	99.9865	75.3702	20.3118	4.31795	―
Percolation - step of 1 g low-Si boninitic melt	1.25 Gpa	1290.13	118.621	117.476	17.4819	44.5236	0.0116953	0.525464	―	8.93404	0.199034	44.2881	1.49609	0.00860169	99.9866	75.2129	20.5352	4.25192	―
Percolation - step of 1 g low-Si boninitic melt	1.25 Gpa	1290.84	119.066	117.917	17.9227	44.5504	0.0114415	0.52461	―	8.93593	0.199771	44.2656	1.49025	0.00851805	99.9865	75.0578	20.7573	4.18494	―
Percolation - step of 1 g low-Si boninitic melt	1.25 Gpa	1291.53	119.509	118.356	18.3615	44.577	0.0111996	0.523774	―	8.93769	0.200503	44.2438	1.48422	0.00843492	99.9866	74.9049	20.978	4.11703	―
Percolation - step of 1 g low-Si boninitic melt	1.25 Gpa	1292.2	119.95	118.792	18.7983	44.6032	0.010969	0.522954	―	8.93936	0.20123	44.2225	1.47802	0.00835231	99.9866	74.7542	21.1975	4.04822	―
Percolation - step of 1 g low-Si boninitic melt	1.25 Gpa	1292.86	120.389	119.227	19.2331	44.6291	0.0107489	0.522148	―	8.94089	0.201953	44.2018	1.47166	0.00827024	99.9866	74.6057	21.4158	3.97854	―
Percolation - step of 1 g low-Si boninitic melt	1.25 Gpa	1293.51	120.826	119.66	19.666	44.6547	0.010539	0.521358	―	8.94233	0.202672	44.1817	1.46513	0.00818871	99.9866	74.4592	21.6328	3.90801	―
Percolation - step of 1 g low-Si boninitic melt	1.25 Gpa	1294.14	121.261	120.091	20.097	44.68	0.0103387	0.52058	―	8.94366	0.203386	44.1621	1.45845	0.00810773	99.9866	74.3147	21.8486	3.83666	―
Percolation - step of 1 g low-Si boninitic melt	1.25 Gpa	1294.75	121.694	120.52	20.5261	44.705	0.0101474	0.519815	―	8.9449	0.204096	44.1431	1.45161	0.00802731	99.9867	74.1723	22.0632	3.76451	―
Percolation - step of 1 g low-Si boninitic melt	1.25 Gpa	1295.36	122.126	120.947	20.9534	44.7297	0.00996473	0.519062	―	8.94604	0.204801	44.1245	1.44462	0.00794744	99.9866	74.0318	22.2766	3.6916	―
Percolation - step of 1 g low-Si boninitic melt	1.25 Gpa	1295.95	122.555	121.373	21.3789	44.7541	0.00979015	0.518321	―	8.94709	0.205503	44.1065	1.43748	0.00786814	99.9867	73.8932	22.4888	3.61795	―
Percolation - step of 1 g low-Si boninitic melt	1.25 Gpa	1296.52	122.983	121.796	21.8026	44.7782	0.00962325	0.51759	―	8.94804	0.2062	44.089	1.43021	0.0077894	99.9867	73.7565	22.6999	3.54358	―
Percolation - step of 1 g low-Si boninitic melt	1.25 Gpa	1297.09	123.408	122.218	22.2245	44.8021	0.00946361	0.516871	―	8.94892	0.206892	44.0719	1.4228	0.00771123	99.9867	73.6216	22.9099	3.46852	―
Percolation - step of 1 g low-Si boninitic melt	1.25 Gpa	1297.64	123.833	122.639	22.6447	44.8257	0.00931084	0.516162	―	8.94971	0.207581	44.0554	1.41525	0.00763362	99.9868	73.4885	23.1187	3.39279	―
Percolation - step of 1 g low-Si boninitic melt	1.25 Gpa	1298.18	124.255	123.057	23.0632	44.849	0.00916457	0.515463	―	8.95043	0.208265	44.0393	1.40758	0.00755657	99.9868	73.3572	23.3264	3.31641	―
Percolation - step of 1 g low-Si boninitic melt	1.25 Gpa	1298.71	124.675	123.474	23.4801	44.8721	0.00902444	0.514773	―	8.95106	0.208946	44.0236	1.39978	0.00748008	99.9868	73.2275	23.5331	3.23942	―
Percolation - step of 1 g low-Si boninitic melt	1.25 Gpa	1299.22	125.094	123.889	23.8954	44.8949	0.00889013	0.514094	―	8.95162	0.209622	44.0084	1.39186	0.00740415	99.9868	73.0996	23.7386	3.16182	―
Percolation - step of 1 g low-Si boninitic melt	1.25 Gpa	1299.73	125.512	124.303	24.309	44.9175	0.00876132	0.513423	―	8.95211	0.210294	43.9936	1.38382	0.00732877	99.9868	72.9733	23.9431	3.08366	―
Percolation - step of 1 g low-Si boninitic melt	1.25 Gpa	1300.22	125.927	124.715	24.7211	44.9398	0.00863771	0.512762	―	8.95254	0.210962	43.9792	1.37567	0.00725394	99.9868	72.8486	24.1465	3.00493	―
Percolation - step of 1 g low-Si boninitic melt	1.25 Gpa	1300.71	126.342	125.125	25.1316	44.9619	0.00851903	0.51211	―	8.9529	0.211626	43.9652	1.36741	0.00717966	99.9868	72.7255	24.3488	2.92568	―
Percolation - step of 1 g low-Si boninitic melt	1.25 Gpa	1301.18	126.754	125.534	25.5406	44.9837	0.008405	0.511468	―	8.9532	0.212286	43.9516	1.35905	0.00710593	99.9868	72.6039	24.5501	2.84592	―
Percolation - step of 1 g low-Si boninitic melt	1.25 Gpa	1301.64	127.165	125.942	25.9481	45.0054	0.00829538	0.510834	―	8.95343	0.212942	43.9384	1.35058	0.00703273	99.9869	72.4839	24.7504	2.76568	―
Percolation - step of 1 g low-Si boninitic melt	1.25 Gpa	1302.09	127.575	126.348	26.3542	45.0268	0.00818993	0.510208	―	8.95361	0.213594	43.9256	1.34201	0.00696006	99.987	72.3653	24.9497	2.68496	―
Percolation - step of 1 g low-Si boninitic melt	1.25 Gpa	1302.54	127.983	126.752	26.7588	45.0479	0.00808843	0.509592	―	8.95372	0.214242	43.9131	1.33335	0.00688793	99.9869	72.2482	25.148	2.60379	―
Percolation - step of 1 g low-Si boninitic melt	1.25 Gpa	1302.97	128.389	127.156	27.162	45.0689	0.00799068	0.508984	―	8.95378	0.214887	43.901	1.32459	0.00681631	99.9869	72.1325	25.3453	2.5222	―
Percolation - step of 1 g low-Si boninitic melt	1.25 Gpa	1303.39	128.795	127.557	27.5639	45.0896	0.00789647	0.508385	―	8.9538	0.215527	43.8892	1.31575	0.00674521	99.9869	72.0182	25.5416	2.4402	―
Percolation - step of 1 g low-Si boninitic melt	1.25 Gpa	1303.81	129.198	127.958	27.9643	45.1102	0.00780562	0.507794	―	8.95375	0.216164	43.8778	1.30682	0.00667463	99.987	71.9052	25.7369	2.35781	―
Percolation - step of 1 g low-Si boninitic melt	1.25 Gpa	1304.22	129.601	128.357	28.3635	45.1305	0.00771797	0.507211	―	8.95367	0.216796	43.8667	1.2978	0.00660455	99.987	71.7936	25.9313	2.27505	―
Percolation - step of 1 g low-Si boninitic melt	1.25 Gpa	1304.61	130.002	128.755	28.7613	45.1506	0.00763334	0.506637	―	8.95353	0.217426	43.8559	1.28871	0.00653496	99.987	71.6833	26.1247	2.19193	―
Percolation - step of 1 g low-Si boninitic melt	1.25 Gpa	1305	130.402	129.151	29.1578	45.1706	0.00755157	0.506072	―	8.95335	0.218051	43.8455	1.27953	0.00646587	99.9871	71.5743	26.3172	2.10848	―
Percolation - step of 1 g low-Si boninitic melt	1.25 Gpa	1305.38	130.8	129.547	29.5531	45.1903	0.00747254	0.505514	―	8.95312	0.218672	43.8353	1.27029	0.00639727	99.9871	71.4666	26.5087	2.02471	―
Percolation - step of 1 g low-Si boninitic melt	1.25 Gpa	1305.75	131.198	129.941	29.9472	45.2098	0.00739609	0.504965	―	8.95285	0.21929	43.8255	1.26097	0.00632915	99.9871	71.36	26.6993	1.94064	―
Percolation - step of 1 g low-Si boninitic melt	1.25 Gpa	1306.12	131.594	130.333	30.34	45.2292	0.00732211	0.504424	―	8.95254	0.219904	43.8159	1.25158	0.0062615	99.9871	71.2547	26.889	1.85628	―
Percolation - step of 1 g low-Si boninitic melt	1.25 Gpa	1306.48	131.988	130.725	30.7317	45.2483	0.00725047	0.503891	―	8.9522	0.220515	43.8066	1.24212	0.00619432	99.9871	71.1506	27.0777	1.77165	―
Percolation - step of 1 g low-Si boninitic melt	1.25 Gpa	1306.83	132.382	131.116	31.1222	45.2673	0.00718105	0.503366	―	8.95181	0.221121	43.7976	1.2326	0.00612761	99.9871	71.0476	27.2656	1.68677	―
Percolation - step of 1 g low-Si boninitic melt	1.25 Gpa	1307.17	132.774	131.505	31.5115	45.2861	0.00711375	0.50285	―	8.95139	0.221725	43.7889	1.22302	0.00606135	99.9872	70.9458	27.4526	1.60165	―
Percolation - step of 1 g low-Si boninitic melt	1.25 Gpa	1307.5	133.166	131.893	31.8997	45.3048	0.00704848	0.502341	―	8.95092	0.222324	43.7804	1.21338	0.00599553	99.9872	70.8451	27.6386	1.51631	―
Percolation - step of 1 g low-Si boninitic melt	1.25 Gpa	1307.83	133.556	132.28	32.2868	45.3232	0.00698513	0.50184	―	8.95043	0.22292	43.7722	1.20369	0.00593017	99.9872	70.7455	27.8238	1.43075	―
Percolation - step of 1 g low-Si boninitic melt	1.25 Gpa	1308.15	133.945	132.666	32.6728	45.3415	0.00692362	0.501347	―	8.94991	0.223513	43.7642	1.19394	0.00586523	99.9872	70.6469	28.0081	1.345	―
Percolation - step of 1 g low-Si boninitic melt	1.25 Gpa	1308.46	134.333	133.051	33.0578	45.3596	0.00686386	0.500861	―	8.94935	0.224102	43.7565	1.18414	0.00580073	99.9872	70.5494	28.1915	1.25907	―
Percolation - step of 1 g low-Si boninitic melt	1.25 Gpa	1308.77	134.72	133.435	33.4417	45.3776	0.00680577	0.500384	―	8.94877	0.224687	43.749	1.17428	0.00573666	99.9873	70.4529	28.3741	1.17297	―
Percolation - step of 1 g low-Si boninitic melt	1.25 Gpa	1309.07	135.106	133.818	33.8246	45.3954	0.00674928	0.499914	―	8.94815	0.225269	43.7418	1.16439	0.005673	99.9873	70.3575	28.5558	1.08672	―
Percolation - step of 1 g low-Si boninitic melt	1.25 Gpa	1309.37	135.49	134.2	34.2065	45.413	0.00669433	0.499451	―	8.9475	0.225847	43.7347	1.15444	0.00560976	99.9872	70.263	28.7366	1.00032	―
Percolation - step of 1 g low-Si boninitic melt	1.25 Gpa	1309.66	135.874	134.581	34.5874	45.4305	0.00664083	0.498997	―	8.94684	0.226422	43.7279	1.14445	0.00554692	99.9873	70.1696	28.9166	0.913797	―
Percolation - step of 1 g low-Si boninitic melt	1.25 Gpa	1309.94	136.257	134.961	34.9674	45.4479	0.00658874	0.498549	―	8.94614	0.226994	43.7213	1.13442	0.00548449	99.9874	70.077	29.0958	0.827152	―
Percolation - step of 1 g low-Si boninitic melt	1.25 Gpa	1310.22	136.639	135.34	35.3464	45.465	0.00653798	0.49811	―	8.94541	0.227562	43.715	1.12435	0.00542244	99.9874	69.9855	29.2741	0.7404	―
Percolation - step of 1 g low-Si boninitic melt	1.25 Gpa	1310.49	137.02	135.718	35.7245	45.4821	0.00648851	0.497677	―	8.94467	0.228127	43.7088	1.11425	0.00536079	99.9875	69.8948	29.4516	0.653553	―
Percolation - step of 1 g low-Si boninitic melt	1.25 Gpa	1310.75	137.4	136.095	36.1016	45.499	0.00644028	0.497252	―	8.9439	0.228689	43.7028	1.10411	0.00529953	99.9875	69.805	29.6283	0.566623	―
Percolation - step of 1 g low-Si boninitic melt	1.25 Gpa	1311.01	137.779	136.471	36.4779	45.5157	0.00639323	0.496834	―	8.94312	0.229247	43.697	1.09393	0.00523864	99.9875	69.7162	29.8042	0.47962	―
Percolation - step of 1 g low-Si boninitic melt	1.25 Gpa	1311.27	138.157	136.846	36.8533	45.5323	0.00634731	0.496423	―	8.9423	0.229802	43.6914	1.08372	0.00517812	99.9875	69.6282	29.9793	0.392553	―
Percolation - step of 1 g low-Si boninitic melt	1.25 Gpa	1311.52	138.534	137.221	37.2278	45.5488	0.00630249	0.496019	―	8.94148	0.230353	43.686	1.07348	0.00511798	99.9875	69.5411	30.1535	0.305434	―
Percolation - step of 1 g low-Si boninitic melt	1.25 Gpa	1311.76	138.91	137.595	37.6015	45.5651	0.00625871	0.495622	―	8.94063	0.230902	43.6807	1.06322	0.00505819	99.9875	69.4548	30.327	0.218273	―
Percolation - step of 1 g low-Si boninitic melt	1.25 Gpa	1312	139.286	137.967	37.9744	45.5813	0.00621594	0.495232	―	8.93976	0.231447	43.6757	1.05292	0.00499876	99.9876	69.3693	30.4996	0.131079	―
Percolation - step of 1 g low-Si boninitic melt	1.25 Gpa	1312.24	139.661	138.339	38.3464	45.5974	0.00617415	0.494849	―	8.93886	0.231988	43.6708	1.0426	0.00493969	99.9876	69.2846	30.6715	0.0438617	―
Percolation - step of 1 g low-Si boninitic melt	1.25 Gpa	1312.5	140.035	138.715	38.722	45.6132	0.00614393	0.494874	―	8.93795	0.232519	43.6649	1.03308	0.00489904	99.9876	69.1993	30.8007	0	―
Percolation - step of 1 g low-Si boninitic melt	1.25 Gpa	1312.8	140.412	139.096	39.1027	45.6287	0.0061287	0.495441	―	8.93699	0.233036	43.6577	1.02468	0.00487982	99.9876	69.1126	30.8874	0	―
Percolation - step of 1 g low-Si boninitic melt	1.25 Gpa	1313.09	140.795	139.479	39.4856	45.6441	0.0061206	0.496254	―	8.93601	0.233545	43.6498	1.01687	0.0048658	99.9876	69.0256	30.9744	0	―
Percolation - step of 1 g low-Si boninitic melt	1.25 Gpa	1313.39	141.18	139.863	39.8704	45.6592	0.00611858	0.497277	―	8.93498	0.234046	43.6414	1.00961	0.00485545	99.9875	68.9385	31.0615	0	―
Percolation - step of 1 g low-Si boninitic melt	1.25 Gpa	1313.68	141.566	140.25	40.2567	45.6742	0.00612173	0.498476	―	8.93393	0.23454	43.6326	1.00285	0.00484774	99.9876	68.8513	31.1487	0	―
Percolation - step of 1 g low-Si boninitic melt	1.25 Gpa	1313.97	141.954	140.637	40.6444	45.689	0.00612926	0.499823	―	8.93284	0.235027	43.6233	0.996556	0.00484195	99.9875	68.7642	31.2358	0	―
Percolation - step of 1 g low-Si boninitic melt	1.25 Gpa	1314.26	142.344	141.026	41.0332	45.7036	0.0061405	0.501294	―	8.93172	0.235508	43.6137	0.990684	0.00483759	99.9875	68.6772	31.3228	0	―
Percolation - step of 1 g low-Si boninitic melt	1.25 Gpa	1314.55	142.735	141.416	41.423	45.718	0.00615487	0.502867	―	8.93056	0.235983	43.6039	0.985204	0.00483433	99.9875	68.5905	31.4095	0	―
Percolation - step of 1 g low-Si boninitic melt	1.25 Gpa	1314.84	143.127	141.806	41.8136	45.7323	0.00617186	0.504524	―	8.92937	0.236453	43.5937	0.980089	0.00483191	99.9874	68.504	31.496	0	―
Percolation - step of 1 g low-Si boninitic melt	1.25 Gpa	1315.12	143.519	142.198	42.2048	45.7465	0.00619102	0.506249	―	8.92814	0.236917	43.5834	0.97531	0.00483017	99.9875	68.4179	31.5821	0	―
Percolation - step of 1 g low-Si boninitic melt	1.25 Gpa	1315.4	143.912	142.589	42.5966	45.7605	0.00621199	0.508029	―	8.92688	0.237377	43.5728	0.970845	0.00482898	99.9875	68.3322	31.6678	0	―
Percolation - step of 1 g low-Si boninitic melt	1.25 Gpa	1315.67	144.306	142.982	42.9888	45.7743	0.00623442	0.509851	―	8.92559	0.237832	43.5621	0.966671	0.00482824	99.9874	68.2469	31.7531	0	―
Percolation - step of 1 g low-Si boninitic melt	1.25 Gpa	1315.95	144.7	143.374	43.3814	45.788	0.00625803	0.511705	―	8.92426	0.238282	43.5513	0.962769	0.00482788	99.9874	68.1621	31.8379	0	―
Percolation - step of 1 g low-Si boninitic melt	1.25 Gpa	1316.22	145.095	143.767	43.7741	45.8016	0.00628258	0.513582	―	8.92289	0.238729	43.5404	0.959119	0.00482785	99.9874	68.0778	31.9222	0	―
Percolation - step of 1 g low-Si boninitic melt	1.25 Gpa	1316.48	145.489	144.16	44.1671	45.815	0.00630783	0.515475	―	8.9215	0.239171	43.5294	0.955705	0.00482811	99.9874	67.994	32.006	0	―
Percolation - step of 1 g low-Si boninitic melt	1.25 Gpa	1316.75	145.884	144.553	44.5601	45.8283	0.00633362	0.517376	―	8.92007	0.239609	43.5183	0.952511	0.00482861	99.9873	67.9107	32.0893	0	―
Percolation - step of 1 g low-Si boninitic melt	1.25 Gpa	1317	146.279	144.946	44.9532	45.8415	0.00635976	0.519279	―	8.91862	0.240044	43.5071	0.949524	0.00482934	99.9873	67.828	32.172	0	―
Percolation - step of 1 g low-Si boninitic melt	1.25 Gpa	1317.26	146.674	145.339	45.3463	45.8546	0.00638613	0.521181	―	8.91712	0.240475	43.496	0.946729	0.00483027	99.9873	67.7459	32.2541	0	―
Percolation - step of 1 g low-Si boninitic melt	1.25 Gpa	1317.51	147.069	145.732	45.7392	45.8675	0.0064126	0.523075	―	8.9156	0.240903	43.4848	0.944115	0.00483137	99.9872	67.6644	32.3356	0	―
Percolation - step of 1 g low-Si boninitic melt	1.25 Gpa	1317.76	147.464	146.125	46.1321	45.8804	0.00643906	0.52496	―	8.91405	0.241327	43.4736	0.941671	0.00483264	99.9873	67.5835	32.4165	0	―
Percolation - step of 1 g low-Si boninitic melt	1.25 Gpa	1318.01	147.859	146.517	46.5248	45.8931	0.00646542	0.526831	―	8.91247	0.241749	43.4624	0.939386	0.00483405	99.9872	67.5031	32.4969	0	―
Percolation - step of 1 g low-Si boninitic melt	1.25 Gpa	1318.25	148.254	146.91	46.9174	45.9057	0.00649161	0.528686	―	8.91086	0.242167	43.4512	0.937251	0.00483559	99.9872	67.4234	32.5766	0	―
Percolation - step of 1 g low-Si boninitic melt	1.25 Gpa	1318.49	148.648	147.302	47.3097	45.9182	0.00651756	0.530522	―	8.90922	0.242582	43.44	0.935256	0.00483726	99.9871	67.3443	32.6557	0	―
Percolation - step of 1 g low-Si boninitic melt	1.25 Gpa	1318.72	149.043	147.694	47.7018	45.9306	0.00654322	0.532338	―	8.90756	0.242994	43.4288	0.933393	0.00483904	99.9871	67.2658	32.7342	0	―
Percolation - step of 1 g low-Si boninitic melt	1.25 Gpa	1318.95	149.437	148.086	48.0936	45.9429	0.00656853	0.534133	―	8.90587	0.243403	43.4177	0.931655	0.00484092	99.9871	67.188	32.812	0	―
Percolation - step of 1 g low-Si boninitic melt	1.25 Gpa	1319.18	149.83	148.478	48.4851	45.9551	0.00659346	0.535904	―	8.90415	0.243809	43.4066	0.930035	0.00484289	99.987	67.1107	32.8893	0	―
Percolation - step of 1 g low-Si boninitic melt	1.25 Gpa	1319.41	150.224	148.869	48.8764	45.9672	0.00661797	0.537651	―	8.9024	0.244212	43.3956	0.928525	0.00484495	99.9871	67.0341	32.9659	0	―
Percolation - step of 1 g low-Si boninitic melt	1.25 Gpa	1319.63	150.617	149.26	49.2673	45.9792	0.00664205	0.539374	―	8.90064	0.244613	43.3846	0.92712	0.00484709	99.987	66.9581	33.0419	0	―
Percolation - step of 1 g low-Si boninitic melt	1.25 Gpa	1319.84	151.01	149.65	49.6579	45.9911	0.00666567	0.541071	―	8.89884	0.245011	43.3736	0.925813	0.0048493	99.987	66.8826	33.1174	0	―
Percolation - step of 1 g low-Si boninitic melt	1.25 Gpa	1320.06	151.402	150.041	50.0481	46.003	0.0066888	0.542741	―	8.89703	0.245406	43.3627	0.924599	0.00485157	99.987	66.8078	33.1922	0	―
Percolation - step of 1 g low-Si boninitic melt	1.25 Gpa	1320.27	151.795	150.43	50.438	46.0147	0.00671145	0.544386	―	8.8952	0.245799	43.3519	0.923473	0.00485391	99.987	66.7337	33.2663	0	―
Percolation - step of 1 g low-Si boninitic melt	1.25 Gpa	1320.48	152.186	150.82	50.8275	46.0263	0.0067336	0.546004	―	8.89334	0.24619	43.3411	0.92243	0.00485631	99.987	66.6601	33.3399	0	―
Percolation - step of 1 g low-Si boninitic melt	1.25 Gpa	1320.68	152.578	151.209	51.2167	46.0378	0.00675524	0.547596	―	8.89146	0.246577	43.3304	0.921466	0.00485877	99.9869	66.5871	33.4129	0	―
Percolation - step of 1 g low-Si boninitic melt	1.25 Gpa	1320.88	152.969	151.598	51.6055	46.0493	0.00677638	0.549161	―	8.88955	0.246963	43.3197	0.920576	0.00486127	99.9869	66.5147	33.4853	0	―
Percolation - step of 1 g low-Si boninitic melt	1.25 Gpa	1321.08	153.36	151.986	51.9939	46.0607	0.00679701	0.5507	―	8.88764	0.247346	43.3091	0.919757	0.00486382	99.9869	66.4429	33.5571	0	―
Percolation - step of 1 g low-Si boninitic melt	1.25 Gpa	1321.28	153.75	152.374	52.3819	46.0719	0.00681713	0.552213	―	8.8857	0.247726	43.2986	0.919004	0.00486641	99.9868	66.3716	33.6284	0	―
Percolation - step of 1 g low-Si boninitic melt	1.25 Gpa	1321.47	154.14	152.762	52.7695	46.0831	0.00683674	0.5537	―	8.88375	0.248104	43.2882	0.918315	0.00486904	99.9869	66.301	33.699	0	―
Percolation - step of 1 g low-Si boninitic melt	1.25 Gpa	1321.66	154.529	153.149	53.1568	46.0942	0.00685586	0.555161	―	8.88177	0.24848	43.2778	0.917685	0.00487171	99.9868	66.2309	33.7691	0	―
Percolation - step of 1 g low-Si boninitic melt	1.25 Gpa	1321.84	154.919	153.536	53.5436	46.1052	0.00687449	0.556597	―	8.87979	0.248854	43.2675	0.917113	0.00487442	99.9868	66.1614	33.8386	0	―
Percolation - step of 1 g low-Si boninitic melt	1.25 Gpa	1322.03	155.307	153.922	53.9301	46.1162	0.00689263	0.558008	―	8.87779	0.249225	43.2572	0.916594	0.00487716	99.9868	66.0924	33.9076	0	―
Percolation - step of 1 g low-Si boninitic melt	1.25 Gpa	1322.21	155.696	154.308	54.3161	46.1271	0.00691029	0.559395	―	8.87577	0.249594	43.247	0.916126	0.00487993	99.9868	66.024	33.976	0	―
Percolation - step of 1 g low-Si boninitic melt	1.25 Gpa	1322.38	156.084	154.694	54.7018	46.1378	0.00692749	0.560758	―	8.87373	0.24996	43.2369	0.915707	0.00488273	99.9867	65.9561	34.0439	0	―
Percolation - step of 1 g low-Si boninitic melt	1.25 Gpa	1322.56	156.471	155.079	55.0871	46.1485	0.00694423	0.562097	―	8.87168	0.250325	43.2269	0.915334	0.00488556	99.9867	65.8888	34.1112	0	―
Percolation - step of 1 g low-Si boninitic melt	1.25 Gpa	1322.73	156.859	155.464	55.472	46.1592	0.00696051	0.563413	―	8.86963	0.250687	43.217	0.915004	0.00488841	99.9868	65.822	34.178	0	―
Percolation - step of 1 g low-Si boninitic melt	1.25 Gpa	1322.9	157.245	155.849	55.8565	46.1697	0.00697636	0.564706	―	8.86755	0.251047	43.2071	0.914717	0.00489128	99.9867	65.7557	34.2443	0	―
Percolation - step of 1 g low-Si boninitic melt	1.25 Gpa	1323.06	157.632	156.233	56.2406	46.1802	0.00699178	0.565978	―	8.86547	0.251405	43.1973	0.914468	0.00489418	99.9867	65.69	34.31	0	―
Percolation - step of 1 g low-Si boninitic melt	1.25 Gpa	1323.23	158.018	156.617	56.6244	46.1906	0.00700679	0.567228	―	8.86337	0.251761	43.1875	0.914257	0.00489711	99.9866	65.6247	34.3753	0	―
Percolation - step of 1 g low-Si boninitic melt	1.25 Gpa	1323.39	158.404	157	57.0077	46.2009	0.00702138	0.568456	―	8.86126	0.252115	43.1779	0.914082	0.00490005	99.9866	65.56	34.44	0	―
Percolation - step of 1 g low-Si boninitic melt	1.25 Gpa	1323.55	158.789	157.383	57.3907	46.2112	0.00703559	0.569665	―	8.85914	0.252466	43.1683	0.913941	0.00490301	99.9867	65.4958	34.5042	0	―
Percolation - step of 1 g low-Si boninitic melt	1.25 Gpa	1323.7	159.174	157.765	57.7733	46.2214	0.00704941	0.570853	―	8.85702	0.252816	43.1588	0.913832	0.00490599	99.9867	65.4321	34.5679	0	―
Percolation - step of 1 g low-Si boninitic melt	1.25 Gpa	1323.86	159.558	158.148	58.1555	46.2315	0.00706286	0.572021	―	8.85488	0.253163	43.1493	0.913754	0.00490898	99.9866	65.3688	34.6312	0	―
Percolation - step of 1 g low-Si boninitic melt	1.25 Gpa	1324.01	159.942	158.529	58.5374	46.2415	0.00707595	0.57317	―	8.85273	0.253509	43.14	0.913704	0.004912	99.9866	65.3061	34.6939	0	―
Percolation - step of 1 g low-Si boninitic melt	1.25 Gpa	1324.16	160.326	158.911	58.9189	46.2515	0.00708869	0.574301	―	8.85057	0.253852	43.1307	0.913683	0.00491503	99.9866	65.2438	34.7562	0	―
Percolation - step of 1 g low-Si boninitic melt	1.25 Gpa	1324.3	160.709	159.292	59.3001	46.2614	0.00710109	0.575414	―	8.84841	0.254193	43.1214	0.913688	0.00491807	99.9865	65.182	34.818	0	―
Percolation - step of 1 g low-Si boninitic melt	1.25 Gpa	1324.45	161.093	159.673	59.6808	46.2712	0.00711316	0.576509	―	8.84625	0.254533	43.1123	0.913718	0.00492113	99.9865	65.1206	34.8794	0	―
Percolation - step of 1 g low-Si boninitic melt	1.25 Gpa	1324.59	161.475	160.053	60.0613	46.281	0.00712492	0.577587	―	8.84407	0.25487	43.1032	0.913771	0.0049242	99.9865	65.0597	34.9403	0	―
Percolation - step of 1 g low-Si boninitic melt	1.25 Gpa	1324.73	161.858	160.433	60.4413	46.2907	0.00713637	0.578648	―	8.84188	0.255205	43.0942	0.913848	0.00492728	99.9865	64.9993	35.0007	0	―
Percolation - step of 1 g low-Si boninitic melt	1.25 Gpa	1324.87	162.239	160.813	60.8211	46.3003	0.00714753	0.579693	―	8.8397	0.255539	43.0852	0.913946	0.00493038	99.9865	64.9393	35.0607	0	―
Pre-metasomatic peridotite after 24.7% fluxing melting	1.25 Gpa	1250	100	100	0	42.2791	0.0113982	0.16268	0.43033	8.7606	0.172059	47.2263	0.947733	0.0005172	99.9907	88.6485	7.9139	2.64855	0.789065
Percolation - step of 1 g high-Si boninitic melt	1.25 Gpa	1252.04	101	100.698	0.698115	42.3731	0.0110533	0.185242	0.426201	8.77072	0.170572	47.1199	0.931594	0.00160412	99.99	88.0061	8.70876	2.48885	0.796279
Percolation - step of 1 g high-Si boninitic melt	1.25 Gpa	1253.96	102	101.375	1.37467	42.4649	0.0107751	0.203198	0.42223	8.78076	0.169167	47.0225	0.913845	0.00189755	99.9893	87.3928	9.4962	2.30931	0.801735
Percolation - step of 1 g high-Si boninitic melt	1.25 Gpa	1255.81	102.884	102.038	2.03824	42.5552	0.0105331	0.218553	0.418397	8.79041	0.167814	46.9308	0.894968	0.00203694	99.9887	86.8005	10.2725	2.12143	0.805594
Percolation - step of 1 g high-Si boninitic melt	1.25 Gpa	1257.6	103.551	102.695	2.6949	42.6441	0.0103073	0.232604	0.414658	8.79972	0.166493	46.8424	0.875593	0.00212311	99.988	86.2225	11.0388	1.93021	0.80847
Percolation - step of 1 g high-Si boninitic melt	1.25 Gpa	1259.34	104.211	103.345	3.34497	42.7318	0.0100955	0.245477	0.411008	8.80868	0.165204	46.7573	0.85575	0.00216937	99.9875	85.6581	11.7956	1.73587	0.810449
Percolation - step of 1 g high-Si boninitic melt	1.25 Gpa	1261.03	104.864	103.989	3.98871	42.8183	0.00989594	0.257283	0.407443	8.81729	0.163943	46.6751	0.835467	0.00218585	99.9869	85.1066	12.5432	1.53863	0.811614
Percolation - step of 1 g high-Si boninitic melt	1.25 Gpa	1262.67	105.511	104.626	4.62637	42.9036	0.00970693	0.268122	0.403958	8.82554	0.16271	46.5958	0.814771	0.00218013	99.9864	84.5673	13.282	1.33867	0.812044
Percolation - step of 1 g high-Si boninitic melt	1.25 Gpa	1264.27	106.152	105.258	5.25818	42.9878	0.00952706	0.278082	0.40055	8.83342	0.161503	46.5192	0.793688	0.00215787	99.9859	84.0396	14.0125	1.13614	0.811811
Percolation - step of 1 g high-Si boninitic melt	1.25 Gpa	1265.83	106.787	105.884	5.88435	43.0709	0.00935512	0.28724	0.397214	8.84096	0.160321	46.4452	0.772241	0.00212324	99.9856	83.5229	14.7349	0.931191	0.810981
Percolation - step of 1 g high-Si boninitic melt	1.25 Gpa	1267.34	107.416	106.505	6.50506	43.1529	0.00919007	0.295668	0.393947	8.84813	0.159163	46.3736	0.750451	0.00207932	99.9851	83.0168	15.4496	0.723949	0.809616
Percolation - step of 1 g high-Si boninitic melt	1.25 Gpa	1268.81	108.04	107.121	7.1205	43.2338	0.00903104	0.303427	0.390746	8.85494	0.158027	46.3043	0.728339	0.00202838	99.9846	82.5208	16.1569	0.514533	0.807772
Percolation - step of 1 g high-Si boninitic melt	1.25 Gpa	1270.25	108.659	107.731	7.73083	43.3138	0.00887728	0.310574	0.387608	8.86141	0.156912	46.2373	0.705925	0.00197211	99.9844	82.0343	16.8571	0.303052	0.805497
Percolation - step of 1 g high-Si boninitic melt	1.25 Gpa	1271.64	109.272	108.336	8.3362	43.3928	0.00872815	0.31716	0.384529	8.86754	0.155818	46.1723	0.683226	0.00191177	99.984	81.5571	17.5505	0.0896081	0.802841
Percolation - step of 1 g high-Si boninitic melt	1.25 Gpa	1273.12	109.881	108.947	8.94711	43.4706	0.00863184	0.324312	0.381454	8.87309	0.154727	46.1055	0.663475	0.00189062	99.9837	81.0845	18.1169	0	0.798554
Percolation - step of 1 g high-Si boninitic melt	1.25 Gpa	1274.65	110.495	109.564	9.56416	43.5472	0.00858475	0.332061	0.378378	8.87811	0.153637	46.0366	0.646865	0.00190113	99.9833	80.6156	18.5912	0	0.793242
Percolation - step of 1 g high-Si boninitic melt	1.25 Gpa	1276.15	111.115	110.182	10.1822	43.6228	0.00855874	0.339844	0.375326	8.88268	0.152558	45.9675	0.631803	0.00191535	99.983	80.152	19.06	0	0.787969
Percolation - step of 1 g high-Si boninitic melt	1.25 Gpa	1277.63	111.736	110.801	10.8008	43.6974	0.00855007	0.347623	0.372299	8.88684	0.151489	45.8985	0.618147	0.00193195	99.9828	79.6939	19.5234	0	0.782714
Percolation - step of 1 g high-Si boninitic melt	1.25 Gpa	1279.08	112.358	111.42	11.4197	43.7709	0.00855563	0.355368	0.369298	8.8906	0.150432	45.8296	0.605765	0.00195006	99.9825	79.2413	19.9813	0	0.777461
Percolation - step of 1 g high-Si boninitic melt	1.25 Gpa	1280.5	112.98	112.039	12.0386	43.8435	0.00857281	0.363055	0.366324	8.89399	0.149386	45.7609	0.594541	0.00196909	99.9822	78.7942	20.4336	0	0.772202
Percolation - step of 1 g high-Si boninitic melt	1.25 Gpa	1281.9	113.602	112.657	12.6573	43.9151	0.00859944	0.370662	0.363377	8.89701	0.148351	45.6925	0.584368	0.00198864	99.982	78.3528	20.8802	0	0.766929
Percolation - step of 1 g high-Si boninitic melt	1.25 Gpa	1283.27	114.223	113.275	13.2755	43.9857	0.00863369	0.378173	0.360457	8.89968	0.147328	45.6245	0.575151	0.00200844	99.9816	77.9171	21.3213	0	0.761635
Percolation - step of 1 g high-Si boninitic melt	1.25 Gpa	1284.62	114.845	113.893	13.893	44.0554	0.008674	0.385574	0.357564	8.902	0.146317	45.557	0.566803	0.00202829	99.9814	77.4869	21.7568	0	0.756321
Percolation - step of 1 g high-Si boninitic melt	1.25 Gpa	1285.93	115.465	114.51	14.5096	44.1243	0.00871906	0.392855	0.354699	8.90401	0.145317	45.49	0.559247	0.00204808	99.9812	77.0623	22.1867	0	0.750982
Percolation - step of 1 g high-Si boninitic melt	1.25 Gpa	1287.23	116.085	115.125	15.1253	44.1922	0.00876777	0.400005	0.351861	8.90571	0.144329	45.4236	0.552411	0.00206769	99.981	76.6433	22.6111	0	0.745621
Percolation - step of 1 g high-Si boninitic melt	1.25 Gpa	1288.49	116.704	115.74	15.7398	44.2593	0.00881918	0.407019	0.34905	8.90712	0.143352	45.3578	0.546234	0.00208708	99.9808	76.2297	23.03	0	0.740236
Percolation - step of 1 g high-Si boninitic melt	1.25 Gpa	1289.73	117.321	116.353	16.3531	44.3256	0.0088725	0.413892	0.346267	8.90822	0.142387	45.2926	0.540656	0.00210619	99.9806	75.8216	23.4435	0	0.734831
Percolation - step of 1 g high-Si boninitic melt	1.25 Gpa	1290.95	117.938	116.965	16.965	44.391	0.00892704	0.420619	0.34351	8.90906	0.141434	45.2281	0.535628	0.00212499	99.9804	75.4189	23.8517	0	0.729408
Percolation - step of 1 g high-Si boninitic melt	1.25 Gpa	1292.14	118.553	117.576	17.5755	44.4557	0.00898224	0.427199	0.34078	8.90962	0.140492	45.1643	0.5311	0.00214347	99.9803	75.0214	24.2546	0	0.723968
Percolation - step of 1 g high-Si boninitic melt	1.25 Gpa	1293.31	119.166	118.185	18.1845	44.5196	0.00903759	0.43363	0.338076	8.90992	0.139561	45.1011	0.527033	0.0021616	99.9801	74.6292	24.6523	0	0.718514
Percolation - step of 1 g high-Si boninitic melt	1.25 Gpa	1294.46	119.778	118.792	18.7919	44.5826	0.0090927	0.439911	0.335398	8.90997	0.138641	45.0387	0.523385	0.00217937	99.9799	74.2421	25.0448	0	0.713049
Percolation - step of 1 g high-Si boninitic melt	1.25 Gpa	1295.58	120.389	119.398	19.3977	44.645	0.00914722	0.446042	0.332745	8.90978	0.137732	44.9771	0.520124	0.00219678	99.9799	73.8601	25.4324	0	0.707577
Percolation - step of 1 g high-Si boninitic melt	1.25 Gpa	1296.68	120.998	120.002	20.0017	44.7066	0.00920085	0.452025	0.330117	8.90935	0.136834	44.9161	0.517216	0.00221384	99.9797	73.483	25.8149	0	0.702098
Percolation - step of 1 g high-Si boninitic melt	1.25 Gpa	1297.76	121.605	120.604	20.6041	44.7675	0.00925335	0.45786	0.327514	8.90869	0.135946	44.8559	0.514634	0.00223053	99.9795	73.1108	26.1926	0	0.696617
Percolation - step of 1 g high-Si boninitic melt	1.25 Gpa	1298.81	122.21	121.205	21.2046	44.8277	0.00930452	0.463549	0.324936	8.90782	0.135069	44.7965	0.51235	0.00224686	99.9795	72.7434	26.5655	0	0.691137
Percolation - step of 1 g high-Si boninitic melt	1.25 Gpa	1299.84	122.814	121.803	21.8034	44.8872	0.00935421	0.469094	0.322381	8.90673	0.134202	44.7377	0.51034	0.00226283	99.9793	72.3807	26.9337	0	0.68566
Percolation - step of 1 g high-Si boninitic melt	1.25 Gpa	1300.86	123.416	122.4	22.4004	44.9461	0.00940227	0.474498	0.319849	8.90543	0.133346	44.6798	0.508583	0.00227845	99.9793	72.0226	27.2972	0	0.680187
Percolation - step of 1 g high-Si boninitic melt	1.25 Gpa	1301.85	124.015	122.996	22.9955	45.0042	0.00944861	0.479763	0.31734	8.90395	0.132499	44.6225	0.507059	0.00229372	99.9791	71.669	27.6562	0	0.674723
Percolation - step of 1 g high-Si boninitic melt	1.25 Gpa	1302.82	124.614	123.589	23.5888	45.0618	0.00949315	0.484891	0.314854	8.90226	0.131662	44.566	0.505749	0.00230866	99.979	71.3199	28.0108	0	0.669269
Percolation - step of 1 g high-Si boninitic melt	1.25 Gpa	1303.77	125.21	124.18	24.1803	45.1187	0.00953582	0.489887	0.31239	8.90039	0.130834	44.5103	0.504636	0.00232326	99.979	70.9752	28.361	0	0.663829
Percolation - step of 1 g high-Si boninitic melt	1.25 Gpa	1304.71	125.804	124.77	24.7698	45.175	0.00957659	0.494752	0.309947	8.89835	0.130017	44.4552	0.503706	0.00233753	99.9789	70.6347	28.7069	0	0.658402
Percolation - step of 1 g high-Si boninitic melt	1.25 Gpa	1305.62	126.397	125.358	25.3575	45.2306	0.00961543	0.49949	0.307526	8.89612	0.129208	44.4009	0.502943	0.00235148	99.9788	70.2984	29.0486	0	0.652992
Percolation - step of 1 g high-Si boninitic melt	1.25 Gpa	1306.52	126.987	125.943	25.9434	45.2857	0.00965232	0.504104	0.305125	8.89374	0.128408	44.3473	0.502336	0.00236512	99.9787	69.9662	29.3862	0	0.647601
Percolation - step of 1 g high-Si boninitic melt	1.25 Gpa	1307.39	127.576	126.527	26.5274	45.3402	0.00968727	0.508597	0.302744	8.89118	0.127618	44.2944	0.501872	0.00237846	99.9787	69.638	29.7198	0	0.642229
Percolation - step of 1 g high-Si boninitic melt	1.25 Gpa	1308.25	128.163	127.11	27.1095	45.3941	0.00972029	0.512974	0.300383	8.88847	0.126836	44.2422	0.50154	0.0023915	99.9786	69.3137	30.0494	0	0.636881
Percolation - step of 1 g high-Si boninitic melt	1.25 Gpa	1309.1	128.748	127.69	27.6898	45.4475	0.0097514	0.517235	0.298042	8.88561	0.126063	44.1906	0.50133	0.00240426	99.9785	68.9934	30.3751	0	0.631554
Percolation - step of 1 g high-Si boninitic melt	1.25 Gpa	1309.92	129.331	128.268	28.2683	45.5003	0.00978061	0.521386	0.295719	8.88261	0.125298	44.1398	0.501234	0.00241674	99.9785	68.6767	30.697	0	0.626252
Percolation - step of 1 g high-Si boninitic melt	1.25 Gpa	1310.73	129.913	128.845	28.8449	45.5526	0.00980796	0.52543	0.293416	8.87946	0.124541	44.0896	0.501242	0.00242894	99.9785	68.3638	31.0152	0	0.620977
Percolation - step of 1 g high-Si boninitic melt	1.25 Gpa	1311.53	130.492	129.42	29.4197	45.6043	0.0098335	0.529369	0.29113	8.87617	0.123793	44.04	0.501346	0.00244089	99.9784	68.0546	31.3297	0	0.615728
Percolation - step of 1 g high-Si boninitic melt	1.25 Gpa	1312.3	131.07	129.993	29.9927	45.6555	0.00985725	0.533206	0.288862	8.87277	0.123052	43.9911	0.50154	0.00245258	99.9783	67.7489	31.6406	0	0.610506
Percolation - step of 1 g high-Si boninitic melt	1.25 Gpa	1313.07	131.646	130.564	30.564	45.7063	0.00987927	0.536946	0.286612	8.86922	0.12232	43.9428	0.501817	0.00246402	99.9784	67.4467	31.948	0	0.605314
Percolation - step of 1 g high-Si boninitic melt	1.25 Gpa	1313.81	132.22	131.133	31.1334	45.7565	0.00989961	0.54059	0.284379	8.86556	0.121595	43.8952	0.50217	0.00247522	99.9784	67.1479	32.252	0	0.600151
Percolation - step of 1 g high-Si boninitic melt	1.25 Gpa	1314.54	132.792	131.701	31.7011	45.8062	0.00991831	0.544142	0.282162	8.86178	0.120878	43.8482	0.502594	0.0024862	99.9784	66.8524	32.5526	0	0.595018
Percolation - step of 1 g high-Si boninitic melt	1.25 Gpa	1315.26	133.363	132.267	32.2671	45.8554	0.00993542	0.547605	0.279962	8.85788	0.120168	43.8017	0.503083	0.00249695	99.9782	66.5602	32.8498	0	0.589917
Percolation - step of 1 g high-Si boninitic melt	1.25 Gpa	1315.96	133.932	132.831	32.8314	45.9042	0.009951	0.550981	0.277778	8.85388	0.119465	43.7559	0.503633	0.00250749	99.9783	66.2713	33.1439	0	0.584847
Percolation - step of 1 g high-Si boninitic melt	1.25 Gpa	1316.65	134.499	133.394	33.3939	45.9525	0.00996511	0.554274	0.27561	8.84976	0.118769	43.7106	0.504239	0.00251782	99.9782	65.9855	33.4347	0	0.579809
Percolation - step of 1 g high-Si boninitic melt	1.25 Gpa	1317.33	135.064	133.955	33.9548	46.0003	0.00997779	0.557487	0.273457	8.84555	0.118081	43.6659	0.504896	0.00252795	99.9782	65.7028	33.7224	0	0.574804
Percolation - step of 1 g high-Si boninitic melt	1.25 Gpa	1317.99	135.628	134.514	34.514	46.0477	0.00998911	0.560621	0.271319	8.84123	0.117399	43.6218	0.505602	0.00253789	99.9782	65.4231	34.007	0	0.569831
Percolation - step of 1 g high-Si boninitic melt	1.25 Gpa	1318.64	136.19	135.072	35.0716	46.0946	0.00999912	0.56368	0.269196	8.83683	0.116724	43.5783	0.506352	0.00254763	99.9782	65.1464	34.2887	0	0.564891
Percolation - step of 1 g high-Si boninitic melt	1.25 Gpa	1319.28	136.75	135.628	35.6276	46.1411	0.0100079	0.566665	0.267087	8.83233	0.116055	43.5352	0.507143	0.0025572	99.9781	64.8727	34.5674	0	0.559984
Percolation - step of 1 g high-Si boninitic melt	1.25 Gpa	1319.9	137.309	136.182	36.182	46.1872	0.0100154	0.569581	0.264993	8.82774	0.115393	43.4927	0.507971	0.0025666	99.9782	64.6017	34.8432	0	0.555112
Percolation - step of 1 g high-Si boninitic melt	1.25 Gpa	1320.52	137.866	136.735	36.7348	46.2329	0.0100218	0.572428	0.262913	8.82306	0.114738	43.4507	0.508835	0.00257583	99.9782	64.3336	35.1161	0	0.550272
Percolation - step of 1 g high-Si boninitic melt	1.25 Gpa	1321.12	138.422	137.286	37.286	46.2781	0.0100271	0.575209	0.260846	8.81832	0.114089	43.4093	0.509731	0.0025849	99.9782	64.0683	35.3863	0	0.545466
Percolation - step of 1 g high-Si boninitic melt	1.25 Gpa	1321.71	138.976	137.836	37.8357	46.3229	0.0100314	0.577927	0.258793	8.81349	0.113446	43.3683	0.510656	0.00259381	99.9781	63.8056	35.6537	0	0.540695
Percolation - step of 1 g high-Si boninitic melt	1.25 Gpa	1322.28	139.528	138.384	38.3839	46.3674	0.0100347	0.580583	0.256753	8.80858	0.112809	43.3278	0.511609	0.00260257	99.9782	63.5456	35.9184	0	0.535957
Percolation - step of 1 g high-Si boninitic melt	1.25 Gpa	1322.85	140.079	138.931	38.9306	46.4114	0.010037	0.58318	0.254726	8.8036	0.112177	43.2879	0.512587	0.00261119	99.9782	63.2882	36.1806	0	0.531253
Percolation - step of 1 g high-Si boninitic melt	1.25 Gpa	1323.41	140.629	139.476	39.4759	46.4551	0.0100384	0.58572	0.252711	8.79855	0.111552	43.2483	0.513589	0.00261967	99.9782	63.0333	36.4401	0	0.526582
Percolation - step of 1 g high-Si boninitic melt	1.25 Gpa	1323.95	141.177	140.02	40.0197	46.4983	0.010039	0.588205	0.250709	8.79344	0.110933	43.2093	0.514611	0.00262802	99.9782	62.781	36.6971	0	0.521945
Percolation - step of 1 g high-Si boninitic melt	1.25 Gpa	1324.49	141.723	140.562	40.562	46.5412	0.0100388	0.590636	0.24872	8.78826	0.110319	43.1707	0.515654	0.00263624	99.9782	62.5311	36.9516	0	0.517342
Percolation - step of 1 g high-Si boninitic melt	1.25 Gpa	1325.01	142.268	141.103	41.103	46.5837	0.0100379	0.593016	0.246742	8.78303	0.10971	43.1326	0.516714	0.00264434	99.9782	62.2836	37.2036	0	0.512772
Percolation - step of 1 g high-Si boninitic melt	1.25 Gpa	1325.52	142.812	141.643	41.6426	46.6259	0.0100362	0.595346	0.244777	8.77773	0.109107	43.0949	0.51779	0.00265232	99.9782	62.0385	37.4532	0	0.508235
Percolation - step of 1 g high-Si boninitic melt	1.25 Gpa	1326.03	143.354	142.181	42.1808	46.6677	0.0100339	0.597629	0.242823	8.77237	0.10851	43.0576	0.518882	0.00266018	99.9782	61.7957	37.7005	0	0.503731
Percolation - step of 1 g high-Si boninitic melt	1.25 Gpa	1326.53	143.895	142.718	42.7176	46.7092	0.0100309	0.599864	0.24088	8.76697	0.107918	43.0208	0.519987	0.00266794	99.9783	61.5553	37.9455	0	0.49926
Percolation - step of 1 g high-Si boninitic melt	1.25 Gpa	1327.01	144.435	143.253	43.2532	46.7503	0.0100274	0.602056	0.238949	8.7615	0.107331	42.9843	0.521105	0.00267558	99.9782	61.317	38.1882	0	0.494822
Percolation - step of 1 g high-Si boninitic melt	1.25 Gpa	1327.49	144.973	143.787	43.7874	46.791	0.0100233	0.604204	0.237029	8.756	0.106749	42.9483	0.522234	0.00268313	99.9782	61.081	38.4286	0	0.490416
Percolation - step of 1 g high-Si boninitic melt	1.25 Gpa	1327.96	145.51	144.32	44.3204	46.8314	0.0100187	0.60631	0.23512	8.75045	0.106172	42.9127	0.523374	0.00269058	99.9782	60.8471	38.6669	0	0.486041
Percolation - step of 1 g high-Si boninitic melt	1.25 Gpa	1328.42	146.046	144.852	44.8521	46.8715	0.0100136	0.608376	0.233221	8.74485	0.1056	42.8775	0.524522	0.00269793	99.9783	60.6154	38.9029	0	0.4817
Percolation - step of 1 g high-Si boninitic melt	1.25 Gpa	1328.87	146.58	145.383	45.3826	46.9113	0.010008	0.610403	0.231333	8.7392	0.105033	42.8427	0.525679	0.0027052	99.9784	60.3857	39.1369	0	0.477389
Percolation - step of 1 g high-Si boninitic melt	1.25 Gpa	1329.31	147.113	145.912	45.9118	46.9507	0.0100021	0.612393	0.229456	8.73351	0.10447	42.8082	0.526843	0.00271238	99.9783	60.1581	39.3687	0	0.473109
Percolation - step of 1 g high-Si boninitic melt	1.25 Gpa	1329.74	147.645	146.44	46.4398	46.9899	0.00999574	0.614347	0.227589	8.72779	0.103912	42.7741	0.528014	0.00271947	99.9784	59.9326	39.5985	0	0.468861
Percolation - step of 1 g high-Si boninitic melt	1.25 Gpa	1330.17	148.176	146.967	46.9667	47.0287	0.00998905	0.616265	0.225732	8.72203	0.103359	42.7404	0.529191	0.00272648	99.9784	59.709	39.8263	0	0.464643
Percolation - step of 1 g high-Si boninitic melt	1.25 Gpa	1330.59	148.705	147.492	47.4924	47.0672	0.00998205	0.61815	0.223885	8.71624	0.102811	42.707	0.530372	0.00273342	99.9784	59.4874	40.0521	0	0.460456
Percolation - step of 1 g high-Si boninitic melt	1.25 Gpa	1331	149.234	148.017	48.0169	47.1054	0.00997475	0.620003	0.222048	8.71041	0.102267	42.674	0.531558	0.00274028	99.9784	59.2677	40.276	0	0.456299
Percolation - step of 1 g high-Si boninitic melt	1.25 Gpa	1331.4	149.761	148.54	48.5403	47.1433	0.00996718	0.621824	0.220221	8.70456	0.101728	42.6414	0.532748	0.00274707	99.9785	59.0499	40.4979	0	0.452172
Percolation - step of 1 g high-Si boninitic melt	1.25 Gpa	1331.8	150.287	149.063	49.0626	47.1809	0.00995936	0.623614	0.218403	8.69866	0.101192	42.609	0.533941	0.00275379	99.9784	58.834	40.7179	0	0.448074
Percolation - step of 1 g high-Si boninitic melt	1.25 Gpa	1332.18	150.812	149.584	49.5838	47.2182	0.00995132	0.625376	0.216595	8.69274	0.100662	42.577	0.535137	0.00276045	99.9784	58.6199	40.9361	0	0.444006
Percolation - step of 1 g high-Si boninitic melt	1.25 Gpa	1332.57	151.336	150.104	50.104	47.2552	0.00994309	0.627109	0.214797	8.6868	0.100135	42.5454	0.536335	0.00276704	99.9785	58.4076	41.1524	0	0.439966
Percolation - step of 1 g high-Si boninitic melt	1.25 Gpa	1332.94	151.858	150.623	50.6231	47.2919	0.00993468	0.628814	0.213007	8.68083	0.0996126	42.514	0.537535	0.00277357	99.9784	58.1971	41.3669	0	0.435955
Percolation - step of 1 g high-Si boninitic melt	1.25 Gpa	1333.31	152.38	151.141	51.1411	47.3284	0.00992611	0.630493	0.211227	8.67483	0.0990943	42.483	0.538736	0.00278004	99.9785	57.9883	41.5797	0	0.431972
Percolation - step of 1 g high-Si boninitic melt	1.25 Gpa	1333.67	152.901	151.658	51.6581	47.3646	0.00991741	0.632147	0.209455	8.66881	0.0985801	42.4523	0.539938	0.00278645	99.9785	57.7813	41.7907	0	0.428017
Percolation - step of 1 g high-Si boninitic melt	1.25 Gpa	1334.02	153.42	152.174	52.1741	47.4005	0.00990859	0.633776	0.207693	8.66277	0.0980699	42.4219	0.54114	0.00279281	99.9786	57.5759	42	0	0.424089
Percolation - step of 1 g high-Si boninitic melt	1.25 Gpa	1334.37	153.939	152.689	52.6892	47.4361	0.00989967	0.635381	0.205939	8.65672	0.0975636	42.3918	0.542342	0.00279911	99.9785	57.3722	42.2076	0	0.420189
Percolation - step of 1 g high-Si boninitic melt	1.25 Gpa	1334.72	154.456	153.203	53.2032	47.4715	0.00989066	0.636963	0.204194	8.65064	0.0970612	42.3619	0.543544	0.00280537	99.9785	57.1702	42.4135	0	0.416316
Percolation - step of 1 g high-Si boninitic melt	1.25 Gpa	1335.05	154.973	153.716	53.7163	47.5066	0.00988159	0.638523	0.202458	8.64454	0.0965626	42.3324	0.544745	0.00281157	99.9785	56.9697	42.6178	0	0.412469
Percolation - step of 1 g high-Si boninitic melt	1.25 Gpa	1335.38	155.489	154.228	54.2285	47.5415	0.00987247	0.640061	0.20073	8.63843	0.0960679	42.3032	0.545946	0.00281773	99.9786	56.7709	42.8205	0	0.408648
Percolation - step of 1 g high-Si boninitic melt	1.25 Gpa	1335.71	156.003	154.74	54.7397	47.5761	0.0098633	0.641578	0.199011	8.63231	0.0955769	42.2742	0.547145	0.00282384	99.9786	56.5736	43.0216	0	0.404853
Percolation - step of 1 g high-Si boninitic melt	1.25 Gpa	1336.02	156.517	155.25	55.25	47.6105	0.00985411	0.643075	0.1973	8.62617	0.0950895	42.2455	0.548343	0.00282991	99.9787	56.3778	43.2211	0	0.401085
Percolation - step of 1 g high-Si boninitic melt	1.25 Gpa	1336.34	157.03	155.759	55.7594	47.6446	0.00984491	0.644553	0.195597	8.62001	0.0946058	42.2171	0.54954	0.00283594	99.9787	56.1836	43.419	0	0.397342
Percolation - step of 1 g high-Si boninitic melt	1.25 Gpa	1336.65	157.542	156.268	56.268	47.6784	0.00983571	0.646012	0.193903	8.61385	0.0941257	42.1889	0.550734	0.00284192	99.9786	55.9909	43.6155	0	0.393623
Percolation - step of 1 g high-Si boninitic melt	1.25 Gpa	1336.95	158.053	156.776	56.7757	47.712	0.00982652	0.647452	0.192216	8.60767	0.0936492	42.161	0.551926	0.00284787	99.9786	55.7996	43.8104	0	0.389929
Percolation - step of 1 g high-Si boninitic melt	1.25 Gpa	1337.24	158.563	157.282	57.2825	47.7454	0.00981736	0.648875	0.190538	8.60149	0.0931761	42.1334	0.553116	0.00285378	99.9787	55.6099	44.0039	0	0.38626
Percolation - step of 1 g high-Si boninitic melt	1.25 Gpa	1337.54	159.073	157.788	57.7885	47.7786	0.00980822	0.650281	0.188867	8.5953	0.0927065	42.106	0.554304	0.00285965	99.9787	55.4215	44.1959	0	0.382615
Percolation - step of 1 g high-Si boninitic melt	1.25 Gpa	1337.82	159.581	158.294	58.2936	47.8115	0.00979912	0.651671	0.187205	8.5891	0.0922403	42.0789	0.555489	0.00286548	99.9788	55.2346	44.3864	0	0.378994
Percolation - step of 1 g high-Si boninitic melt	1.25 Gpa	1338.1	160.089	158.798	58.798	47.8442	0.00979008	0.653044	0.18555	8.58288	0.0917775	42.052	0.556671	0.00287128	99.9788	55.049	44.5756	0	0.375396
Percolation - step of 1 g high-Si boninitic melt	1.25 Gpa	1338.38	160.596	159.302	59.3016	47.8766	0.00978109	0.654402	0.183902	8.57667	0.091318	42.0253	0.55785	0.00287705	99.9787	54.8649	44.7633	0	0.371822
Percolation - step of 1 g high-Si boninitic melt	1.25 Gpa	1338.65	161.102	159.804	59.8043	47.9089	0.00977216	0.655744	0.182263	8.57046	0.0908618	41.9989	0.559026	0.00288278	99.9788	54.682	44.9497	0	0.368271
Percolation - step of 1 g high-Si boninitic melt	1.25 Gpa	1338.92	161.607	160.306	60.3063	47.9409	0.00976331	0.657072	0.180631	8.56424	0.0904088	41.9727	0.560199	0.00288849	99.9788	54.5006	45.1347	0	0.364743
Percolation - step of 1 g high-Si boninitic melt	1.25 Gpa	1339.18	162.112	160.808	60.8076	47.9727	0.00975454	0.658386	0.179006	8.55801	0.0899591	41.9467	0.561368	0.00289416	99.9788	54.3204	45.3184	0	0.361237
Pre-metasomatic peridotite after 24.7% fluxing melting	1.25 Gpa	1250	100	100	0	42.4618	0.0114475	0.163383	―	8.79846	0.172803	47.4304	0.951829	0.000519435	99.9906	89.6577	7.49375	2.84855	―
Percolation - step of 1 g low-Si boninitic melt	1.25 Gpa	1251.9	101	100.634	0.634277	42.5141	0.0108118	0.193587	―	8.80126	0.173517	47.3243	0.969664	0.00346623	99.9907	89.2385	7.81254	2.94894	―
Percolation - step of 1 g low-Si boninitic melt	1.25 Gpa	1253.65	102	101.235	1.23548	42.5631	0.0104576	0.214975	―	8.80641	0.174291	47.2324	0.984641	0.00451341	99.9908	88.8556	8.13637	3.00805	―
Percolation - step of 1 g low-Si boninitic melt	1.25 Gpa	1255.32	102.744	101.822	1.82219	42.6107	0.0101807	0.232797	―	8.81212	0.175084	47.1467	0.997965	0.00515454	99.9907	88.4911	8.45656	3.05239	―
Percolation - step of 1 g low-Si boninitic melt	1.25 Gpa	1256.93	103.334	102.4	2.40002	42.6574	0.00994112	0.248563	―	8.81803	0.175882	47.0651	1.01018	0.00561393	99.9907	88.1391	8.77272	3.08822	―
Percolation - step of 1 g low-Si boninitic melt	1.25 Gpa	1258.49	103.915	102.97	2.96978	42.7031	0.0097335	0.26256	―	8.82406	0.176685	46.9872	1.02137	0.00594126	99.9907	87.7985	9.08483	3.11666	―
Percolation - step of 1 g low-Si boninitic melt	1.25 Gpa	1260	104.487	103.532	3.53218	42.748	0.00955251	0.275031	―	8.83017	0.177492	46.9127	1.0316	0.00617294	99.9907	87.4685	9.39291	3.13862	―
Percolation - step of 1 g low-Si boninitic melt	1.25 Gpa	1261.47	105.052	104.088	4.08779	42.792	0.00939348	0.28618	―	8.83631	0.178301	46.8411	1.04093	0.00633539	99.9906	87.1481	9.69706	3.15481	―
Percolation - step of 1 g low-Si boninitic melt	1.25 Gpa	1262.89	105.611	104.637	4.63713	42.8353	0.00925247	0.296182	―	8.84245	0.179111	46.7723	1.04944	0.00644762	99.9905	86.8368	9.99739	3.16582	―
Percolation - step of 1 g low-Si boninitic melt	1.25 Gpa	1264.28	106.163	105.181	5.1806	42.8779	0.00912619	0.305185	―	8.84853	0.179921	46.7061	1.05716	0.00652327	99.9904	86.5338	10.294	3.17215	―
Percolation - step of 1 g low-Si boninitic melt	1.25 Gpa	1265.63	106.709	105.719	5.71859	42.9198	0.00901192	0.313313	―	8.85456	0.18073	46.6423	1.06416	0.0065721	99.9904	86.2387	10.5872	3.17418	―
Percolation - step of 1 g low-Si boninitic melt	1.25 Gpa	1266.94	107.25	106.251	6.25139	42.961	0.00890742	0.320673	―	8.8605	0.181539	46.5807	1.07047	0.00660107	99.9904	85.9509	10.8769	3.17225	―
Percolation - step of 1 g low-Si boninitic melt	1.25 Gpa	1268.21	107.785	106.779	6.77931	43.0015	0.00881084	0.327355	―	8.86634	0.182347	46.5212	1.07614	0.00661518	99.9903	85.67	11.1633	3.16666	―
Percolation - step of 1 g low-Si boninitic melt	1.25 Gpa	1269.45	108.316	107.303	7.30257	43.0414	0.00872068	0.333437	―	8.87206	0.183152	46.4637	1.08119	0.00661799	99.9903	85.3957	11.4467	3.15764	―
Percolation - step of 1 g low-Si boninitic melt	1.25 Gpa	1270.66	108.842	107.821	7.82139	43.0807	0.00863569	0.338987	―	8.87766	0.183955	46.408	1.08567	0.0066121	99.9902	85.1276	11.727	3.1454	―
Percolation - step of 1 g low-Si boninitic melt	1.25 Gpa	1271.84	109.363	108.336	8.33596	43.1194	0.00855487	0.344062	―	8.88315	0.184756	46.3541	1.08959	0.00659938	99.9902	84.8653	12.0045	3.13015	―
Percolation - step of 1 g low-Si boninitic melt	1.25 Gpa	1272.99	109.88	108.846	8.84646	43.1575	0.00847739	0.348713	―	8.88849	0.185554	46.3018	1.093	0.0065812	99.9901	84.6087	12.2792	3.11204	―
Percolation - step of 1 g low-Si boninitic melt	1.25 Gpa	1274.1	110.393	109.353	9.35304	43.1951	0.00840257	0.352984	―	8.89371	0.18635	46.2511	1.09591	0.00655857	99.9901	84.3575	12.5513	3.09122	―
Percolation - step of 1 g low-Si boninitic melt	1.25 Gpa	1275.19	110.903	109.856	9.85585	43.2321	0.00832988	0.356912	―	8.89877	0.187142	46.2019	1.09835	0.00653226	99.99	84.1114	12.8208	3.06784	―
Percolation - step of 1 g low-Si boninitic melt	1.25 Gpa	1276.26	111.408	110.355	10.355	43.2686	0.00825888	0.360532	―	8.9037	0.187931	46.1542	1.10034	0.00650286	99.9901	83.8702	13.0878	3.04201	―
Percolation - step of 1 g low-Si boninitic melt	1.25 Gpa	1277.29	111.91	110.851	10.8506	43.3045	0.00818922	0.363873	―	8.9085	0.188716	46.1079	1.10189	0.00647081	99.99	83.6338	13.3524	3.01384	―
Percolation - step of 1 g low-Si boninitic melt	1.25 Gpa	1278.3	112.408	111.343	11.3429	43.3399	0.00812063	0.366961	―	8.91314	0.189498	46.0628	1.10303	0.00643647	99.9899	83.4019	13.6147	2.98345	―
Percolation - step of 1 g low-Si boninitic melt	1.25 Gpa	1279.29	112.902	111.832	11.8318	43.3749	0.00805289	0.369819	―	8.91765	0.190277	46.0191	1.10377	0.00640013	99.99	83.1744	13.8747	2.95092	―
Percolation - step of 1 g low-Si boninitic melt	1.25 Gpa	1280.25	113.394	112.317	12.3175	43.4093	0.00798584	0.372469	―	8.92202	0.191052	45.9766	1.10413	0.00636203	99.9899	82.9511	14.1326	2.91635	―
Percolation - step of 1 g low-Si boninitic melt	1.25 Gpa	1281.19	113.882	112.8	12.8	43.4433	0.00791936	0.374927	―	8.92625	0.191823	45.9352	1.10413	0.00632236	99.9899	82.7318	14.3884	2.87983	―
Percolation - step of 1 g low-Si boninitic melt	1.25 Gpa	1282.1	114.367	113.28	13.2795	43.4768	0.00785336	0.377212	―	8.93034	0.192591	45.895	1.10377	0.00628129	99.9899	82.5165	14.6421	2.84143	―
Percolation - step of 1 g low-Si boninitic melt	1.25 Gpa	1283	114.849	113.756	13.7561	43.5098	0.00778778	0.379337	―	8.93429	0.193355	45.8559	1.10308	0.00623897	99.9898	82.305	14.8938	2.80122	―
Percolation - step of 1 g low-Si boninitic melt	1.25 Gpa	1283.87	115.328	114.23	14.2298	43.5425	0.00772257	0.381315	―	8.93811	0.194115	45.8178	1.10206	0.00619552	99.9898	82.0971	15.1436	2.75927	―
Percolation - step of 1 g low-Si boninitic melt	1.25 Gpa	1284.72	115.804	114.701	14.7006	43.5746	0.00765772	0.383159	―	8.94181	0.194871	45.7807	1.10072	0.00615105	99.9897	81.8928	15.3915	2.71566	―
Percolation - step of 1 g low-Si boninitic melt	1.25 Gpa	1285.55	116.277	115.169	15.1688	43.6064	0.00759322	0.384879	―	8.94537	0.195623	45.7447	1.09908	0.00610566	99.9897	81.692	15.6376	2.67045	―
Percolation - step of 1 g low-Si boninitic melt	1.25 Gpa	1286.36	116.748	115.634	15.6342	43.6377	0.00752907	0.386485	―	8.9488	0.196372	45.7096	1.09715	0.00605945	99.9897	81.4945	15.8818	2.62369	―
Percolation - step of 1 g low-Si boninitic melt	1.25 Gpa	1287.16	117.215	116.097	16.097	43.6687	0.0074653	0.387986	―	8.95211	0.197116	45.6754	1.09494	0.00601249	99.9897	81.3002	16.1243	2.57545	―
Percolation - step of 1 g low-Si boninitic melt	1.25 Gpa	1287.93	117.68	116.557	16.5573	43.6992	0.00740191	0.389389	―	8.9553	0.197857	45.6421	1.09246	0.00596486	99.9897	81.1091	16.3651	2.52577	―
Percolation - step of 1 g low-Si boninitic melt	1.25 Gpa	1288.69	118.143	117.015	17.0151	43.7294	0.00733893	0.390703	―	8.95838	0.198594	45.6096	1.08971	0.00591662	99.9896	80.9211	16.6042	2.47472	―
Percolation - step of 1 g low-Si boninitic melt	1.25 Gpa	1289.42	118.603	117.47	17.4704	43.7592	0.00727639	0.391933	―	8.96133	0.199327	45.578	1.08671	0.00586784	99.9896	80.736	16.8417	2.42234	―
Percolation - step of 1 g low-Si boninitic melt	1.25 Gpa	1290.14	119.061	117.923	17.9233	43.7886	0.00721433	0.393086	―	8.96417	0.200055	45.5472	1.08347	0.00581857	99.9896	80.5538	17.0776	2.36867	―
Percolation - step of 1 g low-Si boninitic melt	1.25 Gpa	1290.85	119.516	118.374	18.3739	43.8177	0.00715276	0.394167	―	8.96689	0.20078	45.5172	1.07999	0.00576886	99.9897	80.3743	17.3119	2.31378	―
Percolation - step of 1 g low-Si boninitic melt	1.25 Gpa	1291.53	119.969	118.822	18.8222	43.8464	0.00709172	0.395181	―	8.96951	0.201502	45.488	1.07628	0.00571877	99.9897	80.1977	17.5446	2.25769	―
Percolation - step of 1 g low-Si boninitic melt	1.25 Gpa	1292.21	120.419	119.268	19.2683	43.8747	0.00703124	0.396134	―	8.97203	0.202219	45.4595	1.07234	0.00566833	99.9896	80.0236	17.7759	2.20047	―
Percolation - step of 1 g low-Si boninitic melt	1.25 Gpa	1292.86	120.868	119.712	19.7122	43.9027	0.00697136	0.397029	―	8.97444	0.202932	45.4317	1.0682	0.00561759	99.9896	79.8522	18.0057	2.14213	―
Percolation - step of 1 g low-Si boninitic melt	1.25 Gpa	1293.5	121.314	120.154	20.154	43.9304	0.00691209	0.39787	―	8.97675	0.203642	45.4046	1.06385	0.00556658	99.9896	79.6833	18.234	2.08274	―
Percolation - step of 1 g low-Si boninitic melt	1.25 Gpa	1294.13	121.758	120.594	20.5936	43.9578	0.00685346	0.398661	―	8.97896	0.204347	45.3782	1.0593	0.00551534	99.9896	79.5168	18.4609	2.02232	―
Percolation - step of 1 g low-Si boninitic melt	1.25 Gpa	1294.74	122.2	121.031	21.0312	43.9848	0.0067955	0.399406	―	8.98107	0.205049	45.3524	1.05456	0.00546391	99.9895	79.3527	18.6863	1.96092	―
Percolation - step of 1 g low-Si boninitic melt	1.25 Gpa	1295.34	122.639	121.467	21.4668	44.0115	0.00673824	0.400107	―	8.98309	0.205747	45.3273	1.04963	0.0054123	99.9895	79.191	18.9104	1.89857	―
Percolation - step of 1 g low-Si boninitic melt	1.25 Gpa	1295.92	123.077	121.9	21.9004	44.038	0.00668168	0.400768	―	8.98503	0.20644	45.3028	1.04452	0.00536055	99.9896	79.0315	19.1332	1.8353	―
Percolation - step of 1 g low-Si boninitic melt	1.25 Gpa	1296.5	123.513	122.332	22.3321	44.0641	0.00662585	0.40139	―	8.98686	0.207131	45.2789	1.03923	0.00530868	99.9895	78.8742	19.3546	1.77115	―
Percolation - step of 1 g low-Si boninitic melt	1.25 Gpa	1297.05	123.947	122.762	22.7619	44.0899	0.00657077	0.401978	―	8.98862	0.207817	45.2556	1.03378	0.00525671	99.9895	78.7191	19.5747	1.70616	―
Percolation - step of 1 g low-Si boninitic melt	1.25 Gpa	1297.6	124.379	123.19	23.1899	44.1155	0.00651645	0.402532	―	8.99029	0.208499	45.2329	1.02817	0.00520468	99.9896	78.5661	19.7935	1.64035	―
Percolation - step of 1 g low-Si boninitic melt	1.25 Gpa	1298.13	124.809	123.616	23.616	44.1407	0.00646289	0.403055	―	8.99187	0.209178	45.2107	1.02239	0.00515259	99.9895	78.4152	20.0111	1.57376	―
Percolation - step of 1 g low-Si boninitic melt	1.25 Gpa	1298.65	125.237	124.04	24.0404	44.1657	0.00641012	0.40355	―	8.99338	0.209853	45.1891	1.01647	0.00510047	99.9896	78.2663	20.2273	1.50641	―
Percolation - step of 1 g low-Si boninitic melt	1.25 Gpa	1299.16	125.664	124.463	24.463	44.1904	0.00635813	0.404018	―	8.99481	0.210524	45.1679	1.01039	0.00504833	99.9895	78.1193	20.4424	1.43834	―
Percolation - step of 1 g low-Si boninitic melt	1.25 Gpa	1299.66	126.088	124.884	24.8839	44.2149	0.00630693	0.40446	―	8.99617	0.211191	45.1473	1.00418	0.00499619	99.9895	77.9742	20.6562	1.36958	―
Percolation - step of 1 g low-Si boninitic melt	1.25 Gpa	1300.15	126.511	125.303	25.3032	44.2391	0.00625653	0.404879	―	8.99745	0.211855	45.1272	0.997825	0.00494407	99.9895	77.831	20.8688	1.30014	―
Percolation - step of 1 g low-Si boninitic melt	1.25 Gpa	1300.63	126.933	125.721	25.7208	44.263	0.00620692	0.405275	―	8.99866	0.212515	45.1076	0.991339	0.00489197	99.9895	77.6897	21.0803	1.23007	―
Percolation - step of 1 g low-Si boninitic melt	1.25 Gpa	1301.09	127.353	126.137	26.1368	44.2867	0.00615812	0.405651	―	8.9998	0.213171	45.0885	0.984724	0.00483991	99.9895	77.5501	21.2905	1.15938	―
Percolation - step of 1 g low-Si boninitic melt	1.25 Gpa	1301.55	127.771	126.551	26.5512	44.3102	0.00611011	0.406008	―	9.00088	0.213824	45.0698	0.977986	0.0047879	99.9896	77.4123	21.4996	1.08811	―
Percolation - step of 1 g low-Si boninitic melt	1.25 Gpa	1301.99	128.187	126.964	26.9641	44.3334	0.0060629	0.406346	―	9.00188	0.214473	45.0516	0.971128	0.00473595	99.9896	77.2761	21.7076	1.01627	―
Percolation - step of 1 g low-Si boninitic melt	1.25 Gpa	1302.43	128.602	127.375	27.3754	44.3563	0.00601648	0.406668	―	9.00282	0.215118	45.0337	0.964154	0.00468407	99.9895	77.1417	21.9144	0.943885	―
Percolation - step of 1 g low-Si boninitic melt	1.25 Gpa	1302.86	129.016	127.785	27.7853	44.3791	0.00597084	0.406973	―	9.0037	0.215759	45.0164	0.957068	0.00463227	99.9896	77.0088	22.1202	0.870986	―
Percolation - step of 1 g low-Si boninitic melt	1.25 Gpa	1303.27	129.427	128.194	28.1937	44.4016	0.00592599	0.407264	―	9.00452	0.216397	44.9994	0.949875	0.00458056	99.9896	76.8776	22.3248	0.797592	―
Percolation - step of 1 g low-Si boninitic melt	1.25 Gpa	1303.68	129.838	128.601	28.6008	44.4239	0.00588191	0.407541	―	9.00529	0.217032	44.9828	0.942577	0.00452895	99.9895	76.7479	22.5283	0.723725	―
Percolation - step of 1 g low-Si boninitic melt	1.25 Gpa	1304.08	130.247	129.006	29.0064	44.4459	0.0058386	0.407805	―	9.00599	0.217662	44.9667	0.935179	0.00447743	99.9896	76.6198	22.7308	0.649407	―
Percolation - step of 1 g low-Si boninitic melt	1.25 Gpa	1304.47	130.655	129.411	29.4106	44.4678	0.00579604	0.408057	―	9.00664	0.218289	44.9509	0.927684	0.00442603	99.9896	76.4931	22.9322	0.574658	―
Percolation - step of 1 g low-Si boninitic melt	1.25 Gpa	1304.85	131.061	129.814	29.8135	44.4894	0.00575424	0.408298	―	9.00723	0.218913	44.9354	0.920095	0.00437474	99.9895	76.3679	23.1326	0.4995	―
Percolation - step of 1 g low-Si boninitic melt	1.25 Gpa	1305.22	131.466	130.215	30.2151	44.5109	0.00571318	0.408528	―	9.00778	0.219533	44.9204	0.912417	0.00432357	99.9896	76.2442	23.3319	0.423949	―
Percolation - step of 1 g low-Si boninitic melt	1.25 Gpa	1305.59	131.869	130.615	30.6154	44.5321	0.00567284	0.408748	―	9.00827	0.22015	44.9057	0.904651	0.00427253	99.9896	76.1218	23.5301	0.348028	―
Percolation - step of 1 g low-Si boninitic melt	1.25 Gpa	1305.95	132.272	131.014	31.0144	44.5531	0.00563323	0.408959	―	9.00871	0.220763	44.8913	0.896802	0.00422161	99.9895	76.0008	23.7274	0.271752	―
Percolation - step of 1 g low-Si boninitic melt	1.25 Gpa	1306.3	132.673	131.412	31.4122	44.574	0.00559432	0.409161	―	9.00911	0.221372	44.8773	0.888872	0.00417083	99.9896	75.8812	23.9237	0.195142	―
Percolation - step of 1 g low-Si boninitic melt	1.25 Gpa	1306.64	133.073	131.809	31.8088	44.5946	0.00555611	0.409355	―	9.00946	0.221979	44.8636	0.880865	0.00412018	99.9895	75.7629	24.1189	0.118214	―
Percolation - step of 1 g low-Si boninitic melt	1.25 Gpa	1306.97	133.471	132.204	32.2042	44.6151	0.00551859	0.409542	―	9.00976	0.222581	44.8502	0.872783	0.00406967	99.9896	75.6458	24.3132	0.0409851	―
Percolation - step of 1 g low-Si boninitic melt	1.25 Gpa	1307.33	133.869	132.603	32.6026	44.6353	0.00549286	0.410129	―	9.01001	0.223173	44.836	0.86547	0.0040369	99.9896	75.5283	24.4717	0	―
Percolation - step of 1 g low-Si boninitic melt	1.25 Gpa	1307.72	134.269	133.006	33.006	44.6552	0.00548354	0.41129	―	9.01017	0.223751	44.8203	0.859352	0.00402641	99.9896	75.4094	24.5906	0	―
Percolation - step of 1 g low-Si boninitic melt	1.25 Gpa	1308.11	134.674	133.411	33.4111	44.6748	0.0054814	0.412684	―	9.01027	0.22432	44.8041	0.853813	0.00402047	99.9895	75.2905	24.7095	0	―
Percolation - step of 1 g low-Si boninitic melt	1.25 Gpa	1308.5	135.081	133.818	33.8176	44.6942	0.00548521	0.414269	―	9.01031	0.224881	44.7875	0.848796	0.00401764	99.9895	75.1718	24.8282	0	―
Percolation - step of 1 g low-Si boninitic melt	1.25 Gpa	1308.88	135.49	134.225	34.2252	44.7134	0.00549394	0.416007	―	9.0103	0.225435	44.7706	0.84425	0.00401698	99.9895	75.0535	24.9465	0	―
Percolation - step of 1 g low-Si boninitic melt	1.25 Gpa	1309.25	135.9	134.634	34.6337	44.7324	0.00550673	0.41787	―	9.01022	0.225983	44.7533	0.840131	0.00401787	99.9894	74.9355	25.0645	0	―
Percolation - step of 1 g low-Si boninitic melt	1.25 Gpa	1309.63	136.31	135.043	35.0429	44.7512	0.00552285	0.41983	―	9.01008	0.226524	44.7359	0.836398	0.00401989	99.9895	74.8182	25.1818	0	―
Percolation - step of 1 g low-Si boninitic melt	1.25 Gpa	1309.99	136.722	135.453	35.4526	44.7697	0.00554166	0.421866	―	9.00988	0.22706	44.7183	0.833016	0.00402273	99.9894	74.7014	25.2986	0	―
Percolation - step of 1 g low-Si boninitic melt	1.25 Gpa	1310.36	137.133	135.863	35.8627	44.7881	0.00556265	0.423959	―	9.00962	0.22759	44.7006	0.829955	0.0040262	99.9894	74.5853	25.4147	0	―
Percolation - step of 1 g low-Si boninitic melt	1.25 Gpa	1310.72	137.545	136.273	36.273	44.8063	0.00558537	0.426095	―	9.00932	0.228115	44.6827	0.827187	0.00403015	99.9893	74.47	25.53	0	―
Percolation - step of 1 g low-Si boninitic melt	1.25 Gpa	1311.07	137.958	136.683	36.6833	44.8243	0.00560942	0.428261	―	9.00893	0.228635	44.6649	0.824686	0.00403449	99.9894	74.3555	25.6445	0	―
Percolation - step of 1 g low-Si boninitic melt	1.25 Gpa	1311.42	138.37	137.094	37.0937	44.8421	0.00563449	0.430444	―	9.00851	0.229151	44.647	0.822429	0.00403914	99.9893	74.2417	25.7583	0	―
Percolation - step of 1 g low-Si boninitic melt	1.25 Gpa	1311.76	138.783	137.504	37.504	44.8598	0.00566031	0.432637	―	9.00803	0.229662	44.6291	0.820398	0.00404403	99.9893	74.1289	25.8711	0	―
Percolation - step of 1 g low-Si boninitic melt	1.25 Gpa	1312.1	139.195	137.914	37.9141	44.8772	0.00568663	0.43483	―	9.00749	0.230169	44.6112	0.818573	0.00404912	99.9892	74.0168	25.9832	0	―
Percolation - step of 1 g low-Si boninitic melt	1.25 Gpa	1312.43	139.607	138.324	38.3241	44.8946	0.00571326	0.437019	―	9.0069	0.230671	44.5934	0.816938	0.00405439	99.9893	73.9057	26.0943	0	―
Percolation - step of 1 g low-Si boninitic melt	1.25 Gpa	1312.76	140.019	138.734	38.7337	44.9117	0.00574004	0.439196	―	9.00625	0.23117	44.5756	0.815478	0.00405979	99.9892	73.7955	26.2045	0	―
Percolation - step of 1 g low-Si boninitic melt	1.25 Gpa	1313.08	140.431	139.143	39.143	44.9287	0.00576682	0.441359	―	9.00555	0.231665	44.5579	0.81418	0.00406531	99.9892	73.6862	26.3138	0	―
Percolation - step of 1 g low-Si boninitic melt	1.25 Gpa	1313.4	140.842	139.552	39.552	44.9455	0.00579348	0.443502	―	9.00482	0.232157	44.5402	0.813031	0.00407093	99.9891	73.5779	26.4221	0	―
Percolation - step of 1 g low-Si boninitic melt	1.25 Gpa	1313.71	141.253	139.961	39.9605	44.9622	0.00581993	0.445624	―	9.00402	0.232644	44.5227	0.812019	0.00407663	99.9891	73.4704	26.5296	0	―
Percolation - step of 1 g low-Si boninitic melt	1.25 Gpa	1314.02	141.664	140.369	40.3686	44.9787	0.00584609	0.447721	―	9.00317	0.233129	44.5052	0.811136	0.0040824	99.989	73.3639	26.6361	0	―
Percolation - step of 1 g low-Si boninitic melt	1.25 Gpa	1314.32	142.074	140.776	40.7763	44.9951	0.00587188	0.449791	―	9.00229	0.23361	44.4879	0.81037	0.00408823	99.989	73.2583	26.7417	0	―
Percolation - step of 1 g low-Si boninitic melt	1.25 Gpa	1314.62	142.484	141.183	41.1834	45.0114	0.00589725	0.451834	―	9.00135	0.234087	44.4706	0.809714	0.0040941	99.989	73.1536	26.8464	0	―
Percolation - step of 1 g low-Si boninitic melt	1.25 Gpa	1314.91	142.893	141.59	41.5901	45.0275	0.00592217	0.453848	―	9.00039	0.234562	44.4535	0.80916	0.00410001	99.989	73.0498	26.9502	0	―
Percolation - step of 1 g low-Si boninitic melt	1.25 Gpa	1315.2	143.302	141.996	41.9963	45.0434	0.00594659	0.455832	―	8.99936	0.235033	44.4365	0.808701	0.00410595	99.9889	72.947	27.053	0	―
Percolation - step of 1 g low-Si boninitic melt	1.25 Gpa	1315.48	143.71	142.402	42.4019	45.0593	0.0059705	0.457786	―	8.9983	0.235501	44.4196	0.808329	0.00411192	99.9889	72.8451	27.1549	0	―
Percolation - step of 1 g low-Si boninitic melt	1.25 Gpa	1315.76	144.117	142.807	42.807	45.075	0.00599386	0.459709	―	8.9972	0.235966	44.4029	0.808039	0.00411791	99.9889	72.744	27.256	0	―
Percolation - step of 1 g low-Si boninitic melt	1.25 Gpa	1316.03	144.525	143.212	43.2115	45.0905	0.00601667	0.4616	―	8.99606	0.236428	44.3863	0.807825	0.00412391	99.9888	72.6439	27.3561	0	―
Percolation - step of 1 g low-Si boninitic melt	1.25 Gpa	1316.3	144.931	143.616	43.6155	45.106	0.00603893	0.463461	―	8.99488	0.236887	44.3698	0.807682	0.00412992	99.9889	72.5446	27.4554	0	―
Percolation - step of 1 g low-Si boninitic melt	1.25 Gpa	1316.56	145.337	144.019	44.0189	45.1213	0.00606061	0.465291	―	8.99366	0.237343	44.3534	0.807604	0.00413593	99.9888	72.4462	27.5538	0	―
Percolation - step of 1 g low-Si boninitic melt	1.25 Gpa	1316.82	145.743	144.422	44.4218	45.1364	0.00608173	0.46709	―	8.99241	0.237796	44.3372	0.807588	0.00414195	99.9887	72.3487	27.6513	0	―
Percolation - step of 1 g low-Si boninitic melt	1.25 Gpa	1317.08	146.148	144.824	44.8241	45.1515	0.00610229	0.468859	―	8.99112	0.238246	44.3211	0.80763	0.00414797	99.9887	72.252	27.748	0	―
Percolation - step of 1 g low-Si boninitic melt	1.25 Gpa	1317.33	146.552	145.226	45.2258	45.1664	0.00612229	0.470599	―	8.9898	0.238694	44.3052	0.807725	0.00415398	99.9887	72.1562	27.8438	0	―
Percolation - step of 1 g low-Si boninitic melt	1.25 Gpa	1317.58	146.956	145.627	45.627	45.1812	0.00614174	0.472308	―	8.98843	0.239138	44.2894	0.807869	0.00416	99.9886	72.0612	27.9388	0	―
Percolation - step of 1 g low-Si boninitic melt	1.25 Gpa	1317.82	147.359	146.028	46.0276	45.1959	0.00616064	0.473989	―	8.98705	0.23958	44.2737	0.808061	0.004166	99.9886	71.9671	28.0329	0	―
Percolation - step of 1 g low-Si boninitic melt	1.25 Gpa	1318.06	147.761	146.428	46.4277	45.2105	0.00617902	0.475642	―	8.98563	0.240019	44.2582	0.808296	0.004172	99.9886	71.8737	28.1263	0	―
Percolation - step of 1 g low-Si boninitic melt	1.25 Gpa	1318.29	148.163	146.827	46.8272	45.225	0.00619688	0.477266	―	8.98419	0.240456	44.2428	0.808571	0.00417798	99.9887	71.7812	28.2188	0	―
Percolation - step of 1 g low-Si boninitic melt	1.25 Gpa	1318.52	148.565	147.226	47.2261	45.2393	0.00621423	0.478864	―	8.98271	0.24089	44.2275	0.808885	0.00418396	99.9885	71.6894	28.3106	0	―
Percolation - step of 1 g low-Si boninitic melt	1.25 Gpa	1318.75	148.966	147.624	47.6245	45.2535	0.00623108	0.480435	―	8.9812	0.241321	44.2124	0.809233	0.00418992	99.9885	71.5984	28.4016	0	―
Percolation - step of 1 g low-Si boninitic melt	1.25 Gpa	1318.97	149.366	148.022	48.0223	45.2677	0.00624746	0.481981	―	8.97967	0.24175	44.1974	0.809615	0.00419588	99.9886	71.5082	28.4918	0	―
Percolation - step of 1 g low-Si boninitic melt	1.25 Gpa	1319.19	149.766	148.42	48.4196	45.2817	0.00626337	0.483501	―	8.97811	0.242176	44.1825	0.810028	0.00420182	99.9885	71.4188	28.5812	0	―
Percolation - step of 1 g low-Si boninitic melt	1.25 Gpa	1319.4	150.165	148.816	48.8164	45.2956	0.00627884	0.484997	―	8.97653	0.242599	44.1678	0.81047	0.00420774	99.9885	71.3301	28.6699	0	―
Percolation - step of 1 g low-Si boninitic melt	1.25 Gpa	1319.61	150.564	149.213	49.2126	45.3094	0.00629387	0.486468	―	8.97492	0.24302	44.1532	0.810939	0.00421365	99.9884	71.2422	28.7578	0	―
Percolation - step of 1 g low-Si boninitic melt	1.25 Gpa	1319.82	150.962	149.608	49.6083	45.3231	0.00630847	0.487917	―	8.97329	0.243438	44.1387	0.811434	0.00421955	99.9884	71.155	28.845	0	―
Percolation - step of 1 g low-Si boninitic melt	1.25 Gpa	1320.03	151.36	150.003	50.0034	45.3367	0.00632268	0.489343	―	8.97163	0.243854	44.1244	0.811951	0.00422543	99.9884	71.0685	28.9315	0	―
Percolation - step of 1 g low-Si boninitic melt	1.25 Gpa	1320.23	151.757	150.398	50.3981	45.3502	0.00633649	0.490748	―	8.96995	0.244267	44.1102	0.812491	0.0042313	99.9884	70.9827	29.0173	0	―
Percolation - step of 1 g low-Si boninitic melt	1.25 Gpa	1320.42	152.154	150.792	50.7922	45.3636	0.00634992	0.492131	―	8.96826	0.244678	44.0961	0.813052	0.00423715	99.9884	70.8976	29.1024	0	―
Percolation - step of 1 g low-Si boninitic melt	1.25 Gpa	1320.62	152.55	151.186	51.1859	45.3769	0.006363	0.493493	―	8.96654	0.245087	44.0821	0.813631	0.00424298	99.9884	70.8132	29.1868	0	―
Percolation - step of 1 g low-Si boninitic melt	1.25 Gpa	1320.81	152.946	151.579	51.579	45.39	0.00637572	0.494836	―	8.96481	0.245493	44.0683	0.814229	0.0042488	99.9883	70.7295	29.2705	0	―
Percolation - step of 1 g low-Si boninitic melt	1.25 Gpa	1321	153.341	151.972	51.9716	45.4031	0.00638811	0.496159	―	8.96304	0.245896	44.0546	0.814843	0.0042546	99.9883	70.6464	29.3536	0	―
Percolation - step of 1 g low-Si boninitic melt	1.25 Gpa	1321.18	153.735	152.364	52.3638	45.4161	0.00640019	0.497463	―	8.96128	0.246297	44.041	0.815473	0.00426039	99.9883	70.5641	29.4359	0	―
Percolation - step of 1 g low-Si boninitic melt	1.25 Gpa	1321.36	154.129	152.755	52.7555	45.429	0.00641195	0.498748	―	8.95948	0.246696	44.0275	0.816118	0.00426616	99.9882	70.4823	29.5177	0	―
Percolation - step of 1 g low-Si boninitic melt	1.25 Gpa	1321.54	154.523	153.147	53.1467	45.4418	0.00642342	0.500017	―	8.95768	0.247092	44.0141	0.816776	0.00427192	99.9882	70.4013	29.5987	0	―
Percolation - step of 1 g low-Si boninitic melt	1.25 Gpa	1321.72	154.916	153.537	53.5374	45.4546	0.00643461	0.501267	―	8.95585	0.247486	44.0009	0.817447	0.00427766	99.9883	70.3208	29.6792	0	―
Percolation - step of 1 g low-Si boninitic melt	1.25 Gpa	1321.89	155.309	153.928	53.9277	45.4672	0.00644553	0.502502	―	8.95401	0.247878	43.9877	0.818129	0.00428338	99.9881	70.241	29.759	0	―
Percolation - step of 1 g low-Si boninitic melt	1.25 Gpa	1322.06	155.701	154.317	54.3175	45.4797	0.00645619	0.50372	―	8.95215	0.248267	43.9747	0.818823	0.00428909	99.9881	70.1618	29.8382	0	―
Percolation - step of 1 g low-Si boninitic melt	1.25 Gpa	1322.23	156.093	154.707	54.7069	45.4922	0.0064666	0.504922	―	8.95028	0.248654	43.9618	0.819526	0.00429478	99.9881	70.0832	29.9168	0	―
Percolation - step of 1 g low-Si boninitic melt	1.25 Gpa	1322.39	156.484	155.096	55.0958	45.5045	0.00647678	0.506109	―	8.9484	0.249039	43.949	0.820239	0.00430046	99.9881	70.0052	29.9948	0	―
Percolation - step of 1 g low-Si boninitic melt	1.25 Gpa	1322.55	156.875	155.484	55.4843	45.5168	0.00648673	0.507281	―	8.9465	0.249421	43.9363	0.820961	0.00430612	99.9881	69.9278	30.0722	0	―
Percolation - step of 1 g low-Si boninitic melt	1.25 Gpa	1322.71	157.266	155.872	55.8723	45.529	0.00649647	0.508439	―	8.9446	0.249802	43.9237	0.82169	0.00431176	99.988	69.8509	30.1491	0	―
Percolation - step of 1 g low-Si boninitic melt	1.25 Gpa	1322.87	157.656	156.26	56.26	45.5411	0.006506	0.509583	―	8.94267	0.25018	43.9113	0.822427	0.00431739	99.9881	69.7747	30.2253	0	―
Percolation - step of 1 g low-Si boninitic melt	1.25 Gpa	1323.02	158.045	156.647	56.6472	45.5531	0.00651534	0.510714	―	8.94075	0.250555	43.8989	0.823171	0.00432301	99.988	69.699	30.301	0	―
Percolation - step of 1 g low-Si boninitic melt	1.25 Gpa	1323.17	158.434	157.034	57.034	45.565	0.00652449	0.511831	―	8.93881	0.250929	43.8866	0.823922	0.00432861	99.9879	69.6239	30.3761	0	―
Percolation - step of 1 g low-Si boninitic melt	1.25 Gpa	1323.32	158.823	157.42	57.4204	45.5769	0.00653346	0.512936	―	8.93685	0.2513	43.8745	0.824678	0.00433419	99.988	69.5493	30.4507	0	―
Percolation - step of 1 g low-Si boninitic melt	1.25 Gpa	1323.46	159.211	157.806	57.8064	45.5887	0.00654226	0.514028	―	8.93489	0.251669	43.8624	0.825439	0.00433976	99.988	69.4753	30.5247	0	―
Percolation - step of 1 g low-Si boninitic melt	1.25 Gpa	1323.61	159.599	158.192	58.192	45.6004	0.00655091	0.515109	―	8.93292	0.252036	43.8504	0.826205	0.00434532	99.988	69.4018	30.5982	0	―
Percolation - step of 1 g low-Si boninitic melt	1.25 Gpa	1323.75	159.987	158.577	58.5773	45.612	0.00655939	0.516178	―	8.93094	0.252401	43.8386	0.826976	0.00435086	99.988	69.3289	30.6711	0	―
Percolation - step of 1 g low-Si boninitic melt	1.25 Gpa	1323.89	160.374	158.962	58.9621	45.6235	0.00656773	0.517235	―	8.92894	0.252763	43.8268	0.82775	0.00435639	99.9879	69.2564	30.7436	0	―
Percolation - step of 1 g low-Si boninitic melt	1.25 Gpa	1324.03	160.761	159.347	59.3466	45.635	0.00657593	0.518282	―	8.92694	0.253124	43.8151	0.828529	0.0043619	99.9879	69.1845	30.8155	0	―
Percolation - step of 1 g low-Si boninitic melt	1.25 Gpa	1324.16	161.147	159.731	59.7307	45.6463	0.006584	0.519318	―	8.92494	0.253482	43.8035	0.82931	0.0043674	99.9878	69.1131	30.8869	0	―
Percolation - step of 1 g low-Si boninitic melt	1.25 Gpa	1324.29	161.533	160.114	60.1144	45.6576	0.00659194	0.520343	―	8.92293	0.253838	43.7921	0.830095	0.00437288	99.9879	69.0422	30.9578	0	―
Percolation - step of 1 g low-Si boninitic melt	1.25 Gpa	1324.42	161.919	160.498	60.4978	45.6689	0.00659976	0.521359	―	8.92091	0.254192	43.7807	0.830882	0.00437835	99.9879	68.9718	31.0282	0	―
Percolation - step of 1 g low-Si boninitic melt	1.25 Gpa	1324.55	162.304	160.881	60.8808	45.68	0.00660747	0.522365	―	8.91889	0.254545	43.7694	0.831671	0.0043838	99.9879	68.9019	31.0981	0	―
Note: The high-Si and low-Si boninitic endmember melts are taken from Table S6
References
Manning, C. E., 2004, The chemistry of subduction-zone fluids: Earth and Planetary Science Letters, v. 223, no. 1, p. 1-16.
Salters, V. J. M., and Stracke, A., 2004, Composition of the depleted mantle: Geochemistry, Geophysics, Geosystems, v. 5, no. 5.
